# Supplementary material for: Site-specific N-glycosylation of alpha-2-macroglobulin reflects the progression of Schistosoma japonicum-induced liver fibrosis
Source: Research Square preprint supplement (doi:10.21203/rs.3.rs-8453779/v1), 2026-02-20
Supplement: Supplementary file 1 [file 658ff934ec48bd53d9bdf795.docx]

***Supplementary information for***

**Site-specific N-glycosylation of alpha-2-macroglobulin reflects the progression**

**of *Schistosoma japonicum*-induced liver fibrosis**

Song Zhao1,2※, Hanjie Li1,3※, Guofang Li3, Lu Xu3,4, Niannian Bi2, Nakanishi Hideki1,*, Ganglong Yang3,* and Xiao-Dong Gao1,3,*

1 Key Laboratory of Carbohydrate Chemistry and Biotechnology, Ministry of Education, School of Biotechnology, Jiangnan University, Wuxi, Jiangsu 214122, China

2 Key Laboratory of National Health Commission on Parasitic Disease Control and Prevention, Jiangsu Provincial Key Laboratory on Parasite and Vector Control Technology, Jiangsu Institute of Parasitic Diseases, Wuxi, China

3 State Key Laboratory of Biopharmaceutical Preparation and Delivery, Institute of Process Engineering, Chinese Academy of Sciences, Beijing, China.

4 Liaoning Provincial Core Lab of Glycobiology and Glycoengineering, College of Basic Medical Sciences, Dalian Medical University, Dalian, 116044, China

**
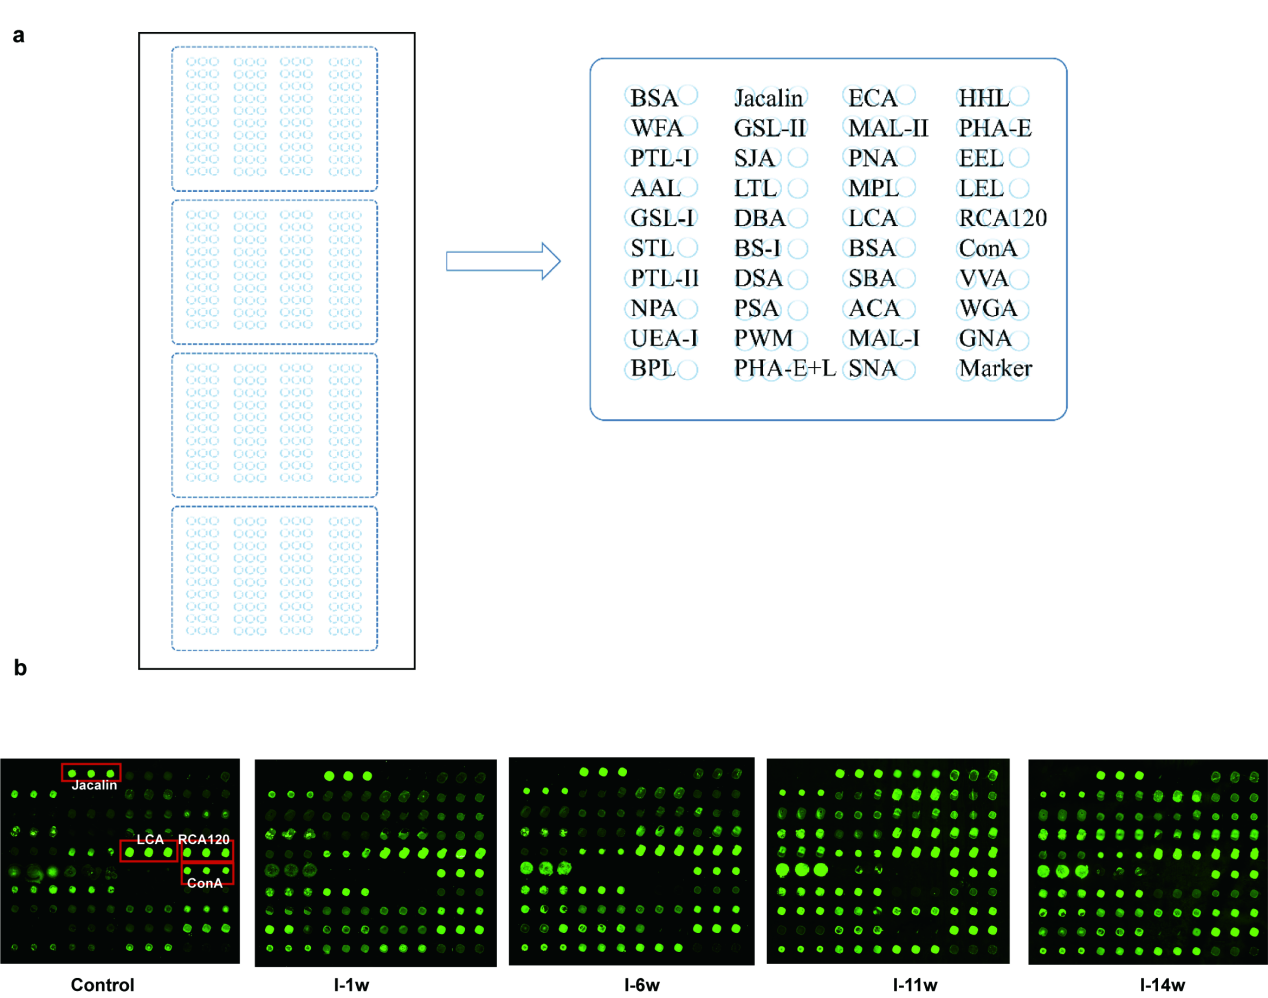
**

**Supplementary Fig. 1：****Glycosylation patterns of serum glycoprotein during the progression of SjLF determined by lectin microarray. (a).** The construction and matrix of lectin microarray. All the lectins were spotted in triplicate on slides, four identical blocks were spotted per slide. **(b).** Scanning image of the serum glycoproteins from control, early infection (I-1w), late infection (I-6w), early liver fibrosis (I-12w) and late liver fibrosis stages (I-14w).

**
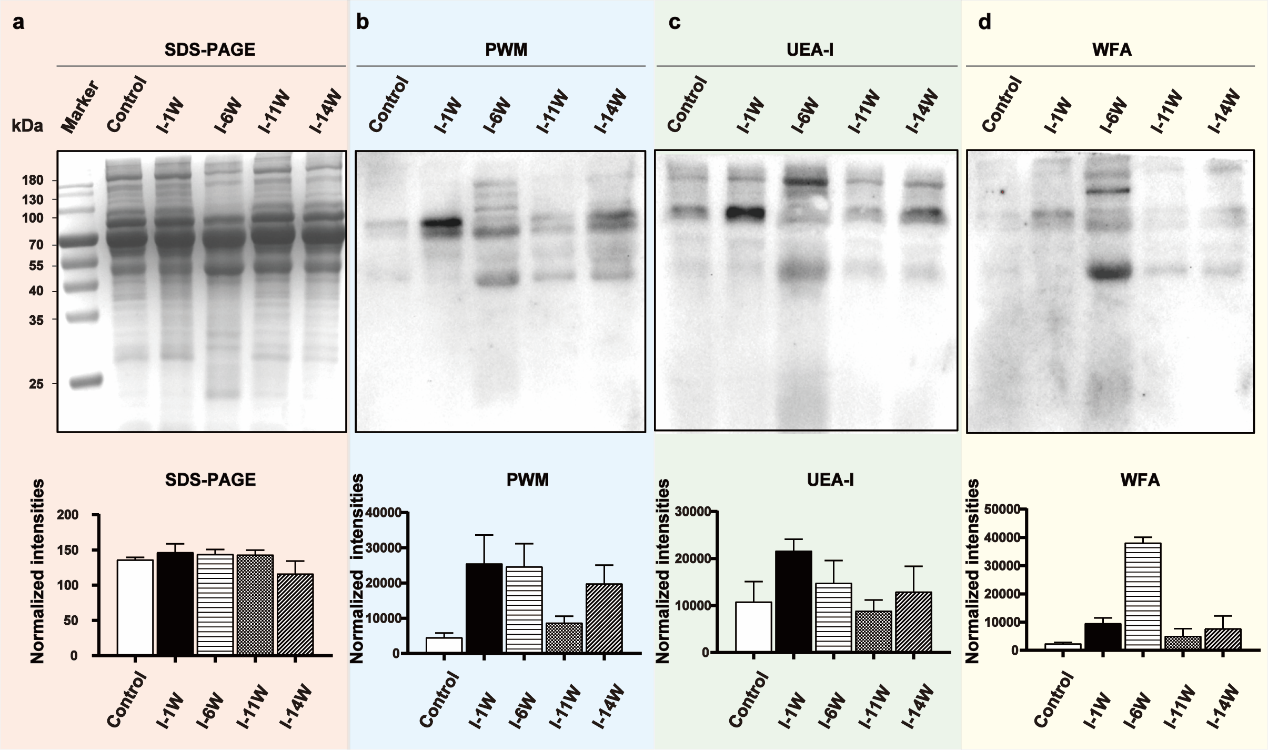
**

**Supplementary Fig. 2. Validation the glycosylation patterns of serum glycoprotein during the progression of SjLF determined by lectin blotting. (a).** SDS-PAGE analysis of serum samples. Samples were collected from the health (control), early infection (I-1w), late infection (I-6w), early liver fibrosis (I-12w) and late liver fibrosis (I-14w) stages of the SjLF rabbit. **(b-c).** Lectin blotting of the serum glycoproteins. Serum proteins separated by SDS-PAGE were transferred to a PVDF membrane and incubated with (**b**) PWM for blotting branched (LacNAc)n; (**c**) UEA-1 for detecting terminal fucosylation and (**d**) WFA for GalNAc α/β 1-3/6 Gal terminal.


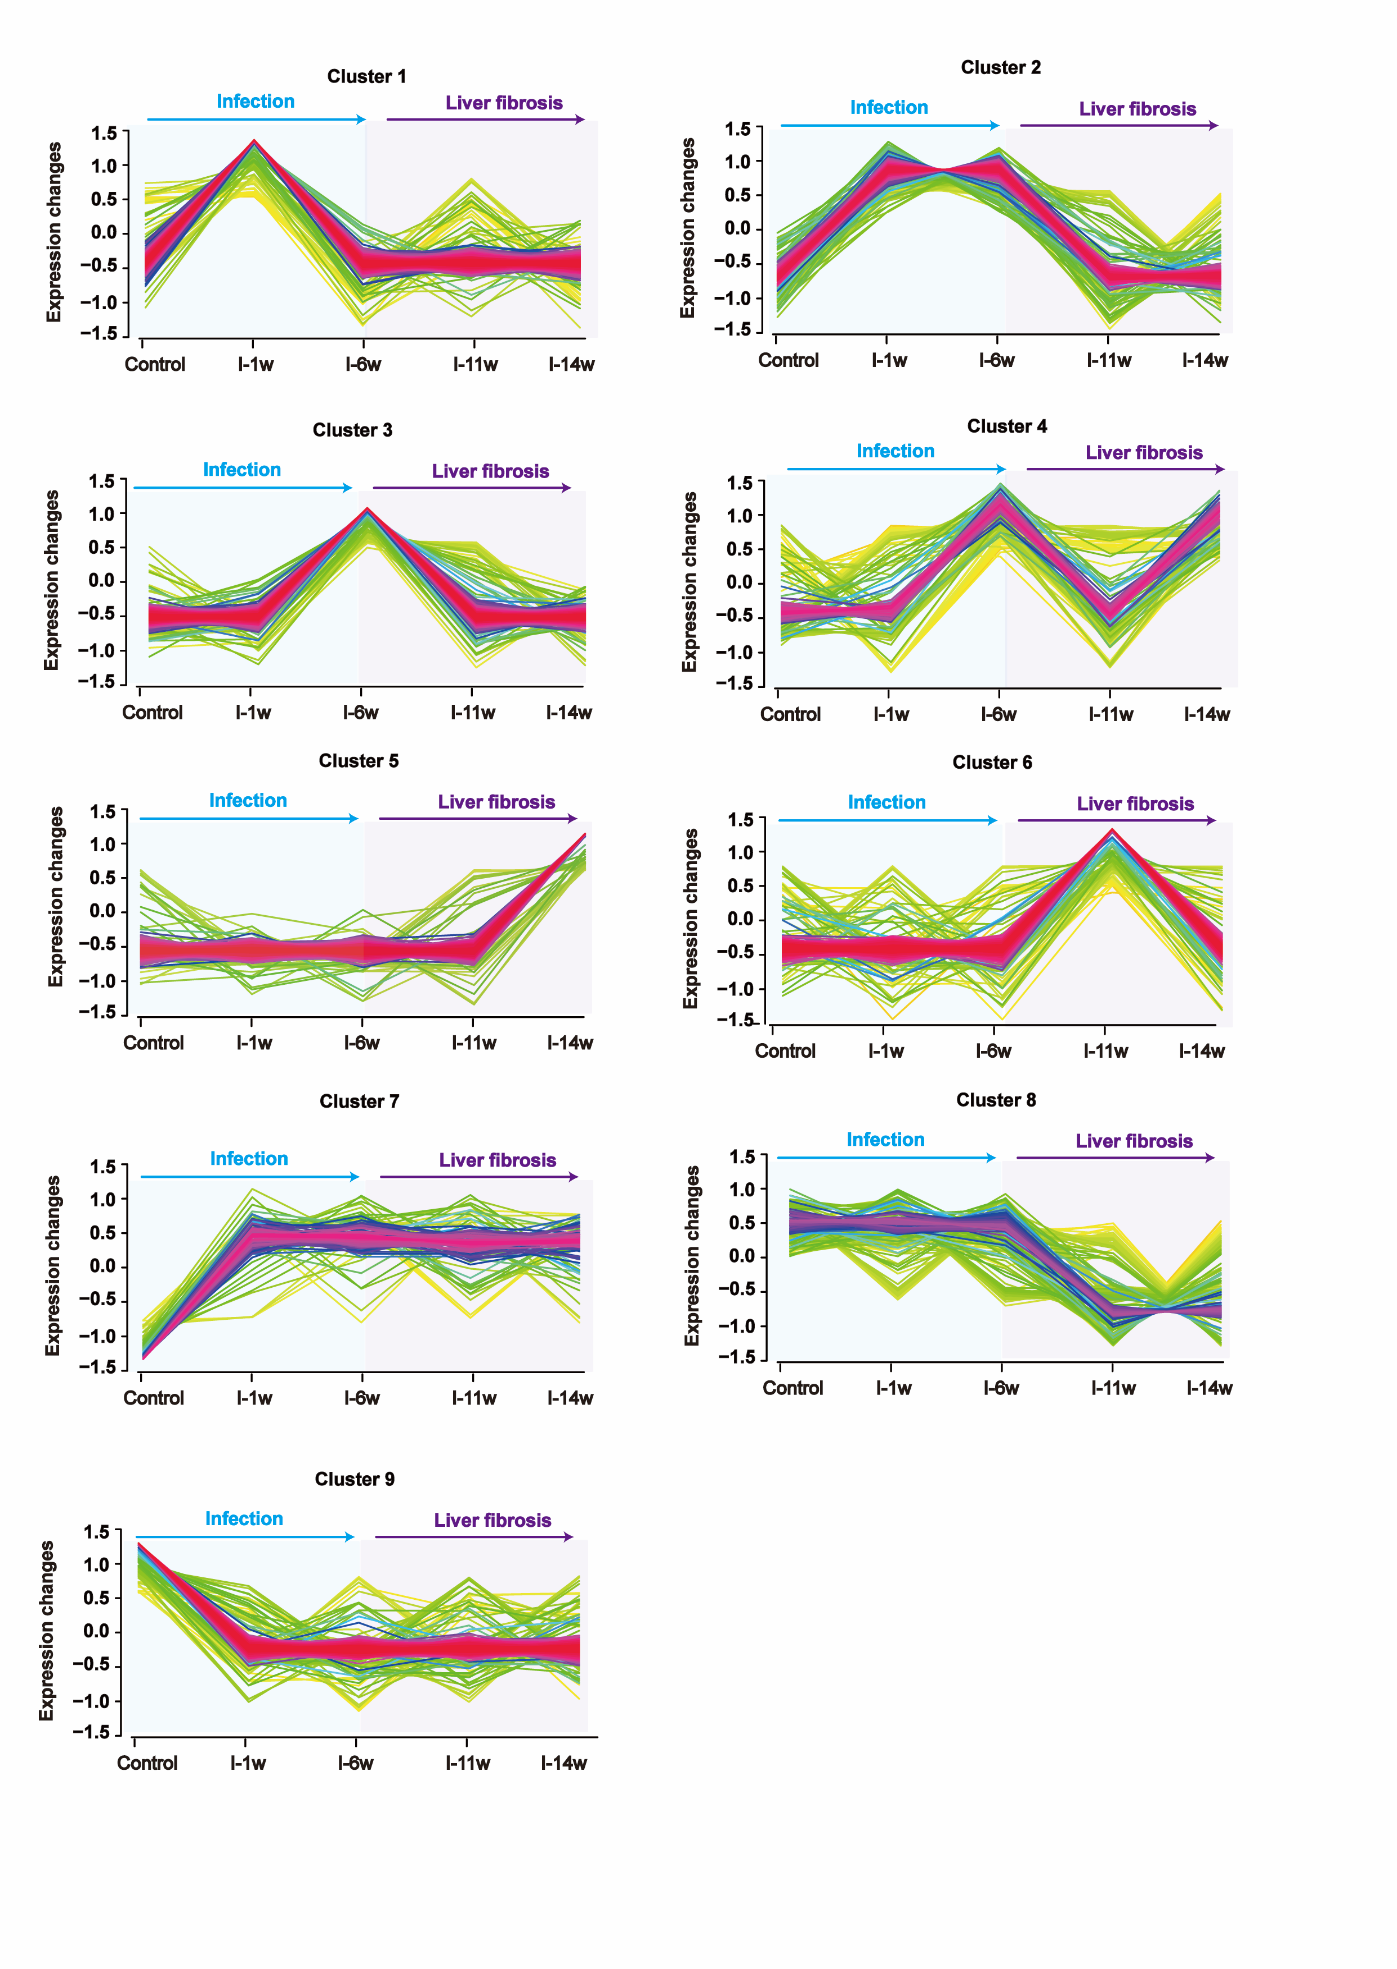


**Supplementary Fig. 3. The clusters of the IGPs identified in the progression of SjLF.** All the relative abundance of IGPs were analyzed with Fuzzy c-means to characterize the feature of IGPs in the progression of SjLF. The Fuzzy c-means clustering identified nine distinct temporal patterns of protein glycosylation. The x axis represents six stages with control, infection and liver fibrosis, while the y axis represents the expression change with log2-transformed normalized relative abundance in each stage and supported by the Supplementary Table 2.

**Supplementary Fig. 4. Serum ALT/AST levels and concurrent liver fibrosis grading of the 12-patient cohort.** The Liver Parenchyma Grading of SjLF patients. Grade 0: Normal. Uniform echo pattern with moderate brightness and homogeneous distribution. Grade I: Coarse echo texture. Characterized by thickened and hyperechoic foci with heterogeneous distribution. Grade II: Prominent hyperechoic bands forming a "fish-scale" pattern, with mesh diameters mostly <2 cm. Grade III: Dense hyperechoic bands creating a reticular framework, resembling "tortoise shell" or "map-like" morphology, with mesh diameters mostly >2 cm. The concentration of alanine aminotransferase (ALT) in SjLF patients, in which the reference range is 0-40 U/L in normal controls, which were set as a threshold with light blue. The concentration of aspartate aminotransferase (AST) in SjLF, in which the reference range is 0-50 U/L in normal controls, which were set as a threshold with light red.


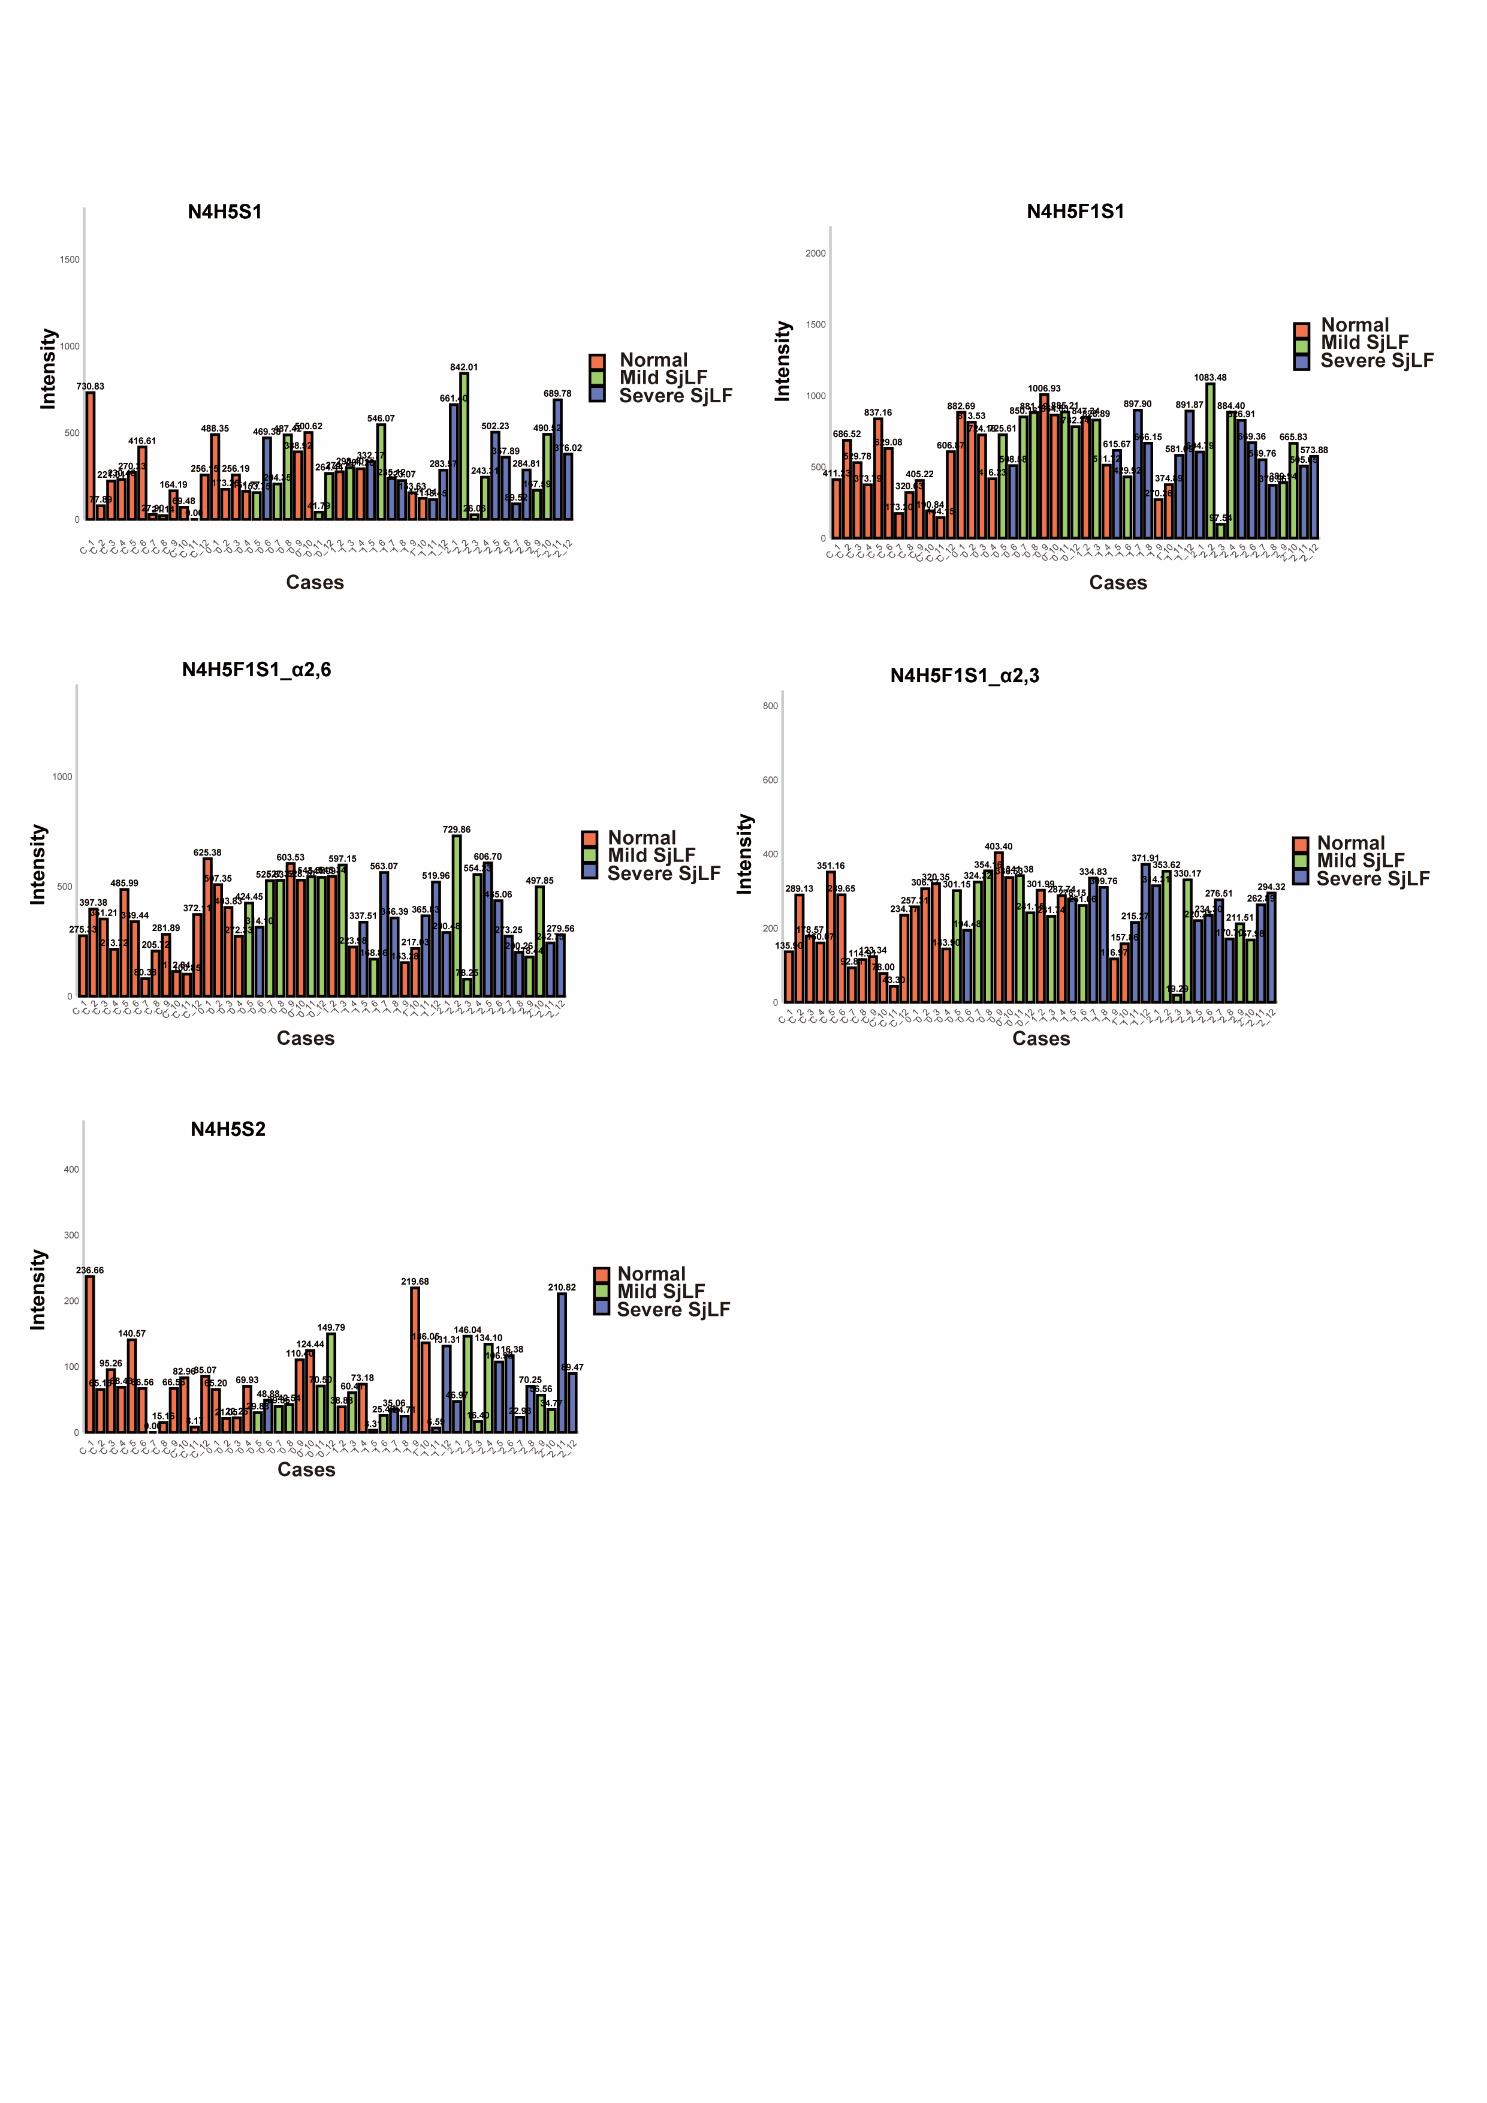


**Supplementary Fig. 5. The abundance distribution of the IGPs containing the A2M-N1424QT site in clinical sera.** The relative abundance of N1424QT-N2H5S1, N1424QT-N2H5F1S1, and N1424QT-N2H5S2 were correspondence with Figure 5e, while the N1424QT-N2H5F1S1_α2,6 and N1424QT-N2H5F1S1_α2,3 were correspondence with Figure 5f. The hepatic parenchymal status of the cohorts was indicated with different colors, in which the red was set as normal, green as mild and blue as severe SjLF.


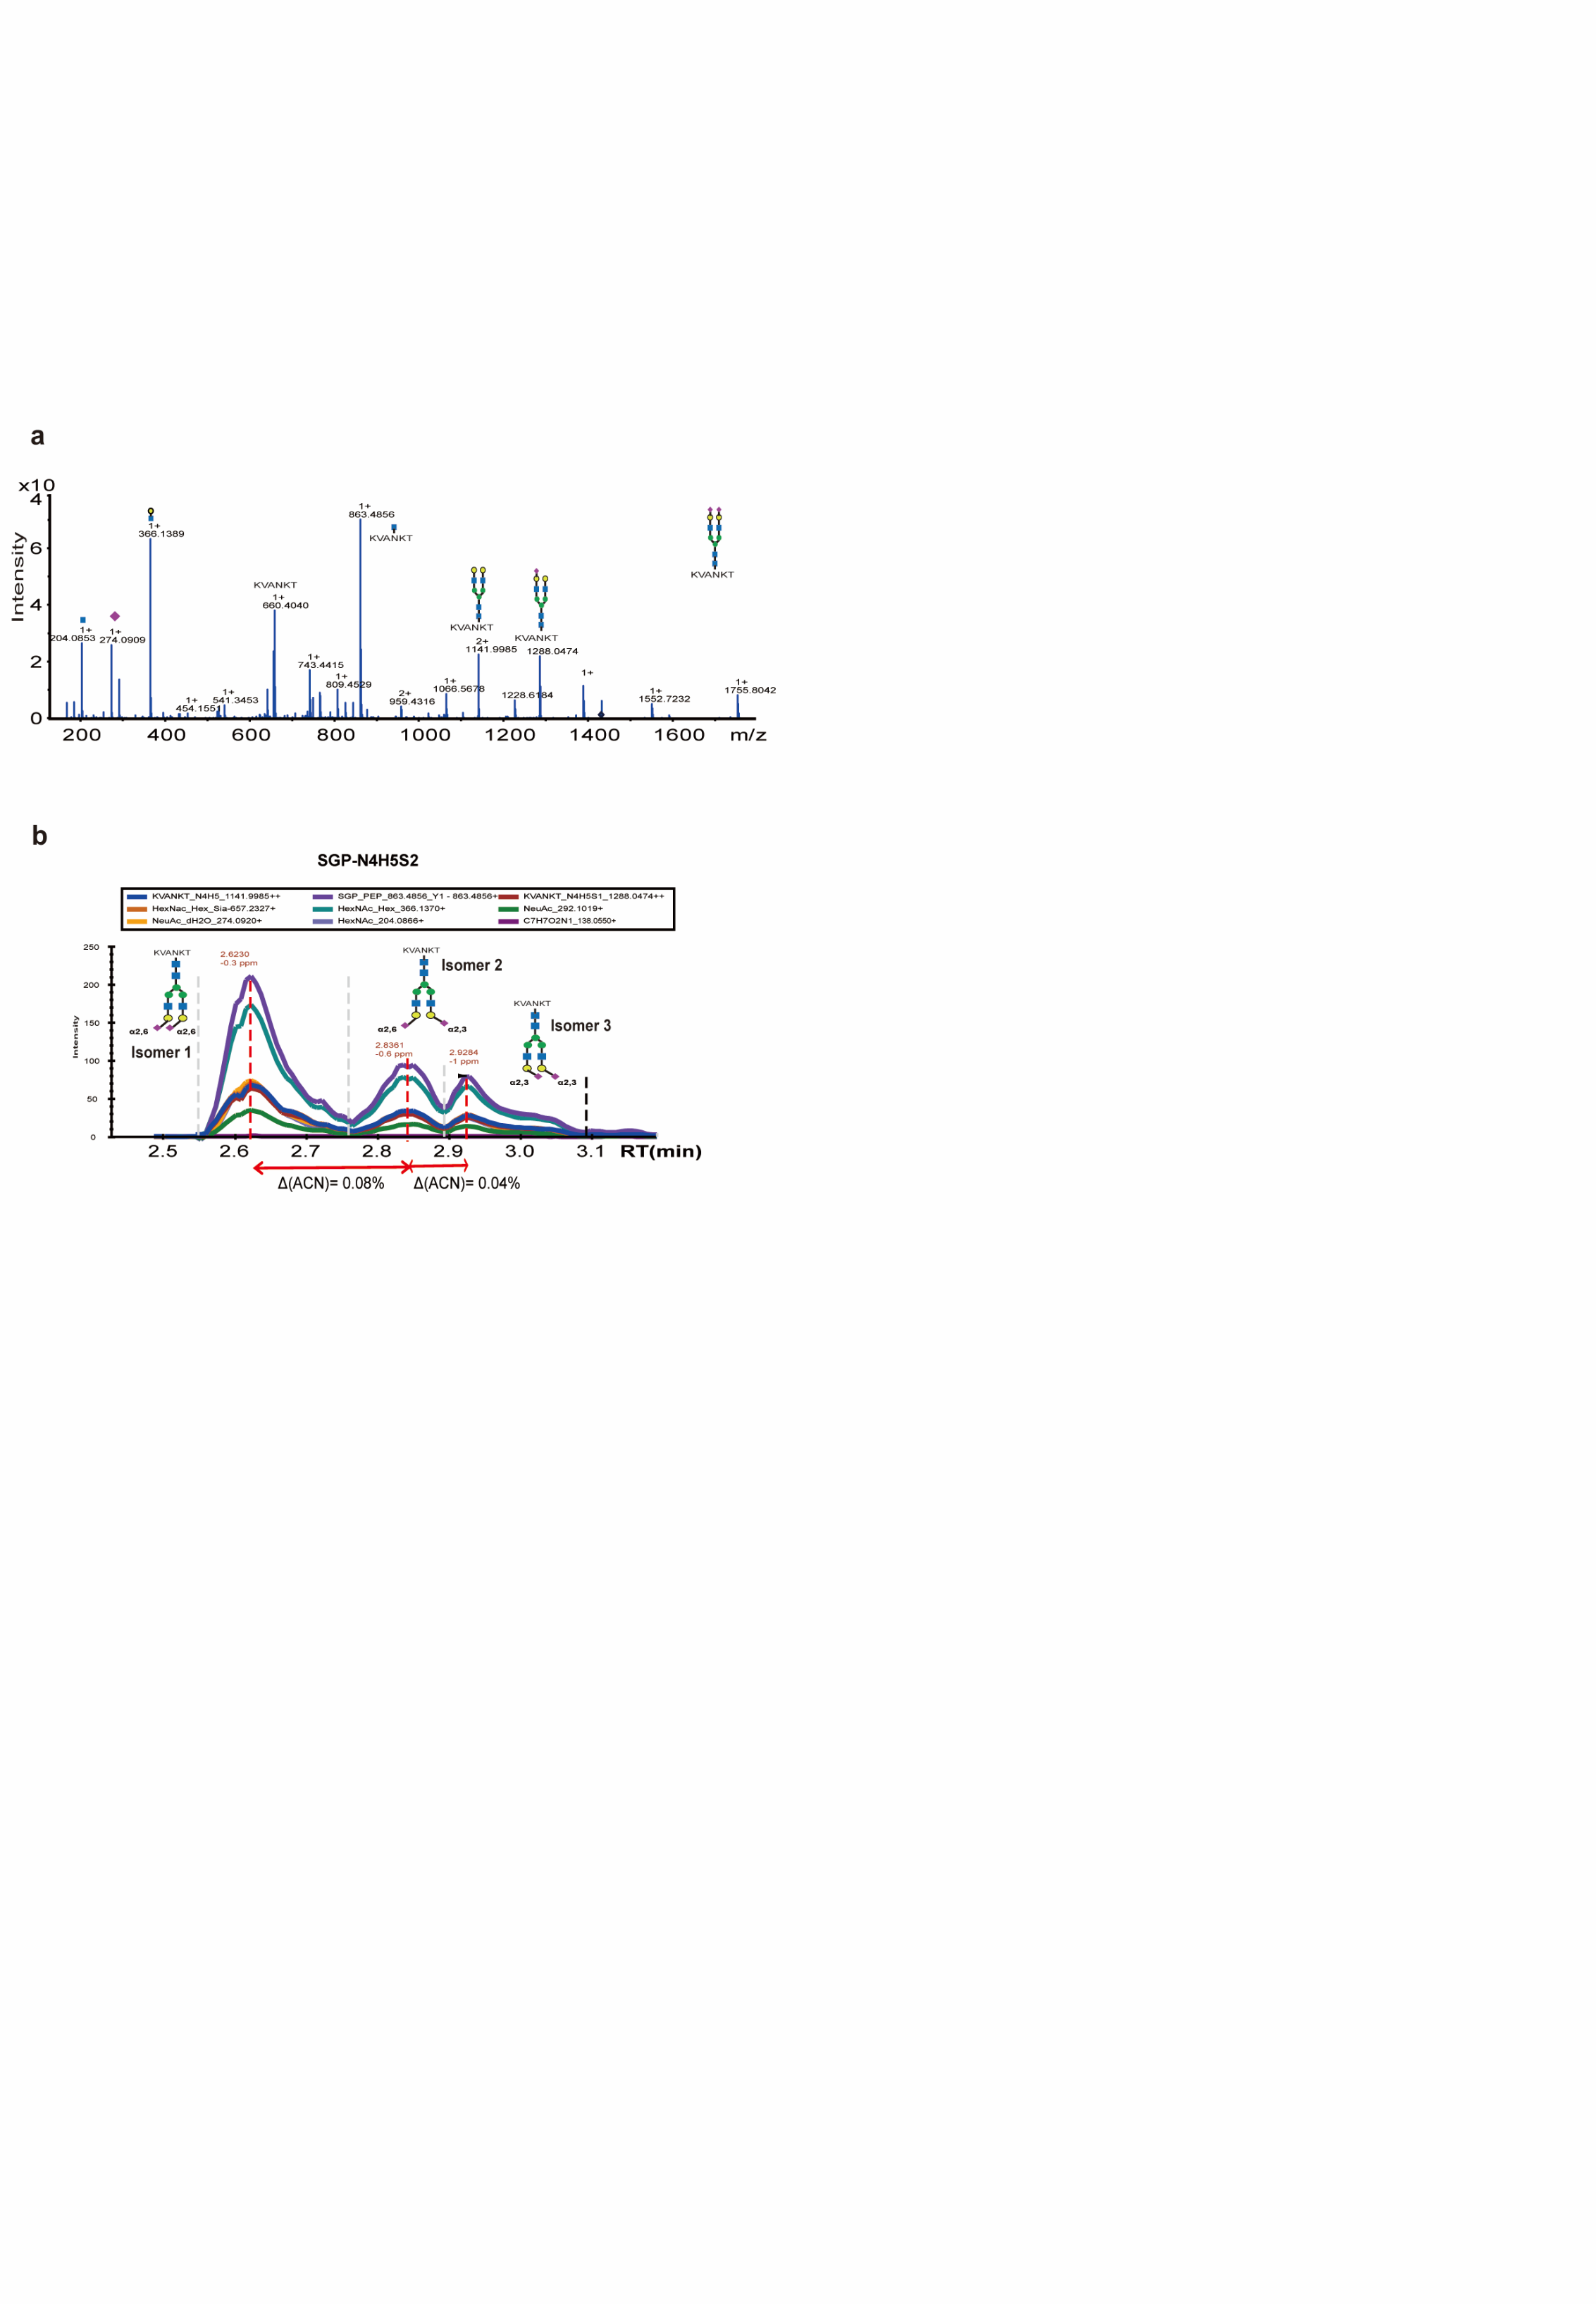


**Supplementary Fig. 6. The isomers of the SGP sialylated glycosylation quantified by PRM-MS. (a).** The MS/MS spectra of Sialoglyopeptide (SGP) for the spectra library. **(b).** The identification and quantification ion distribution of KVANKT-N4H5S2, which could clearly distinguish the isomers. It showed that the isomer 1 was KVANKT-N4H5S2_α2,6/α2,6, isomer 2 was KVANKT-N4H5S2_α2,6/α2,3, and isomer 3 was KVANKT-N4H5S2_α2,3/α2,3.

**
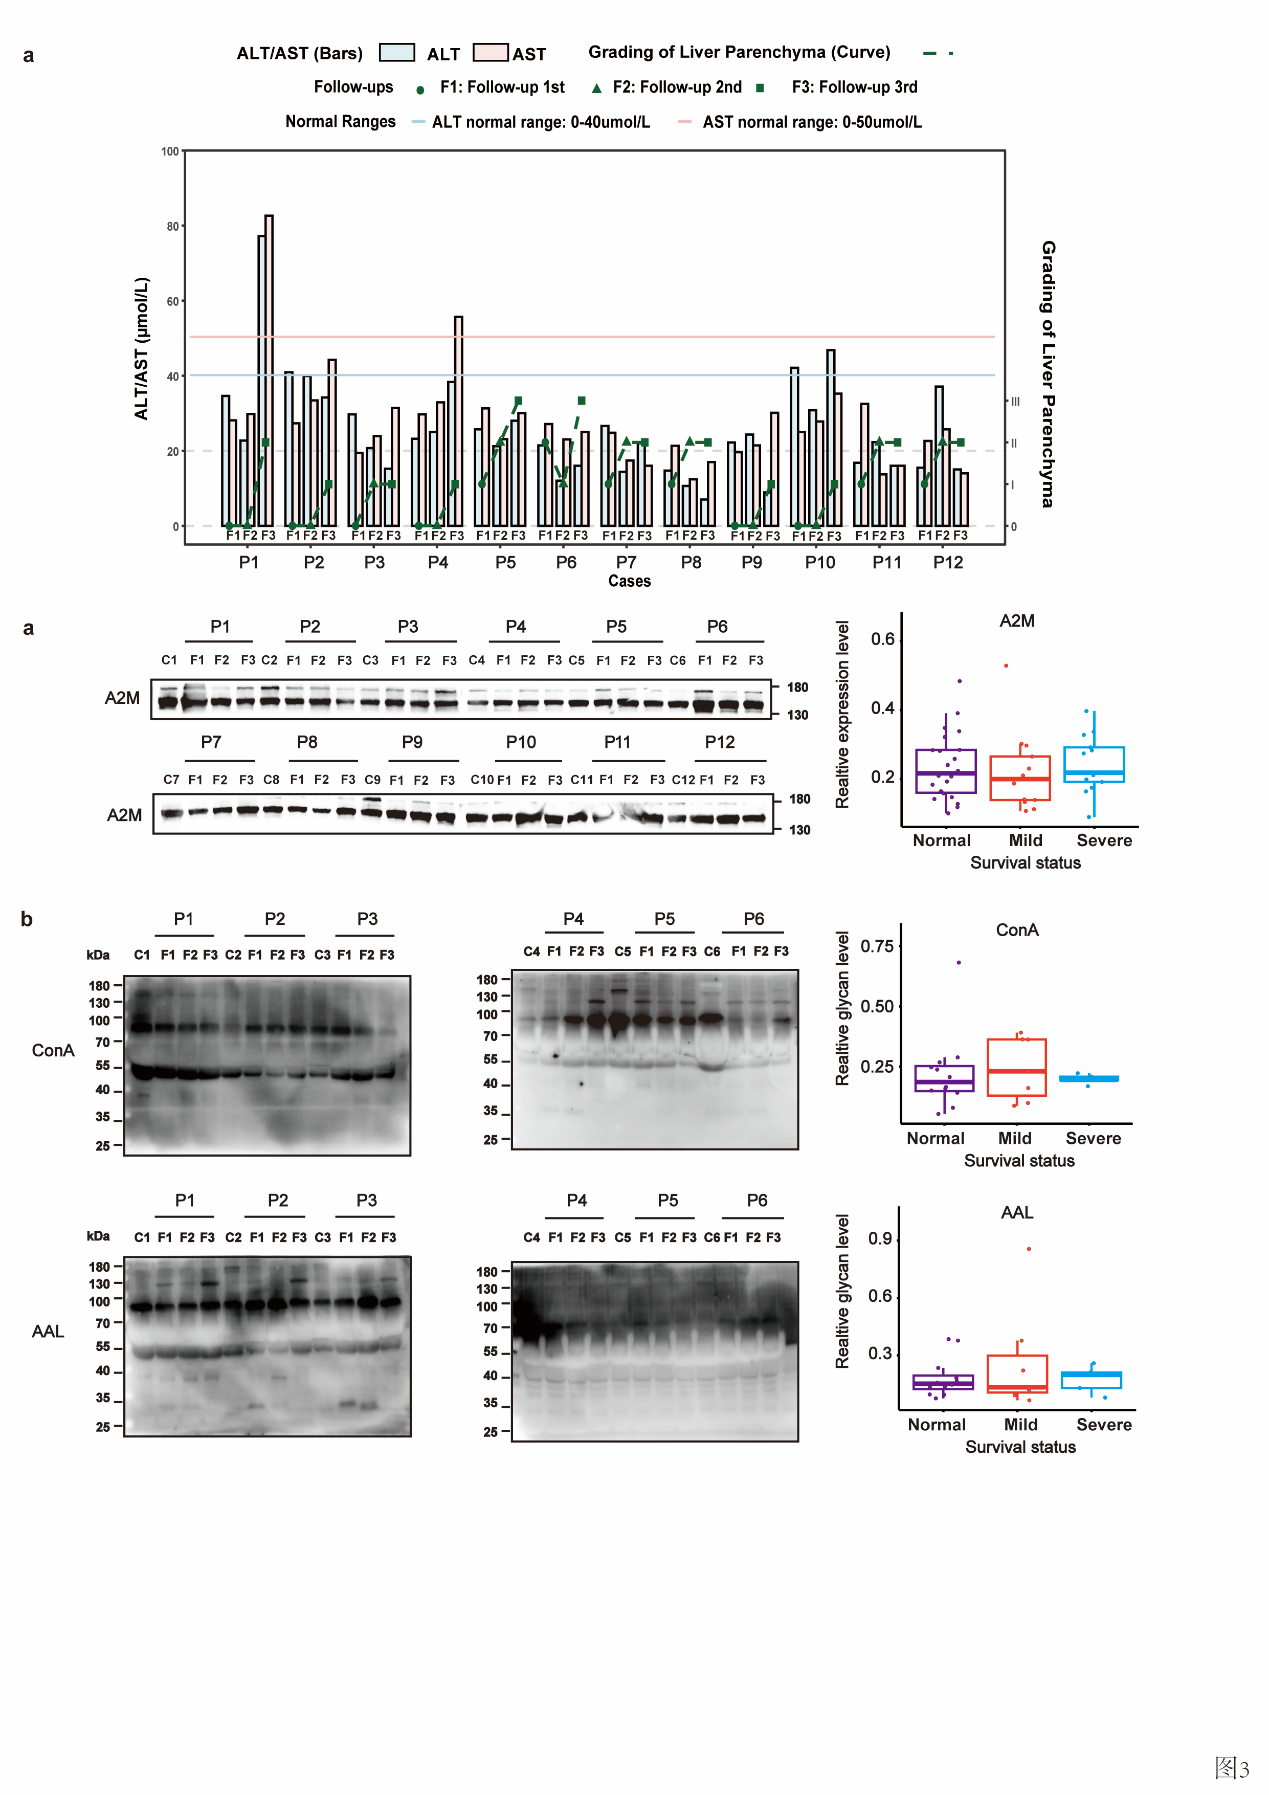
**

**Supplementary Fig. 7. The protein expression and global glycosylation of A2M in clinical samples of the SjLF. (a).** The protein levels of A2M in clinical sera samples monitored by Western Blot. Quantitative analysis of A2M protein abundance using ImageJ, delineating differential expression dynamics between healthy controls and patients across stage of SjLF. (**b).** The global N-linked glycans and fucosylated glycans levels of A2M in the clinical sera samples monitored by Lectin blotting using ConA and AAL. Quantitative analysis of A2M glycosylation levels using ImageJ, delineating differential glycosylation levels dynamics between healthy volunteers and patients across stage of SjLF.
