# Supplementary material for: Site-specific N-glycosylation of alpha-2-macroglobulin reflects the progression of Schistosoma japonicum-induced liver fibrosis
Source: Research Square preprint supplement (doi:10.21203/rs.3.rs-8453779/v1), 2026-02-20
Supplement: Supplementary file 2 [file ad480c18a83ba5f33dfb5553.xlsx]

## Sheet: Tables S1
Supplementary Table 1. Average NFI values of 37 lectins in pooled serum samples by lectin microarrays
Lectin	Control （avg±sd）	I-1w（avg±sd）	I-6w（avg±sd）	I-11w（avg±sd）	I-14w（avg±sd）
Jacalin	0.116±0.011	0.104±0.005	0.109±0.003	0.123±0.004	0.124±0.002
ECA	0.016±0.002	0±0.001	0±0	0.015±0	0.007±0.003
HHL	0.017±0	0.012±0.001	0.013±0	0.012±0	0.014±0.001
WFA	0.035±0.001	0.03±0.001	0.047±0.002	0.045±0.001	0.033±0.001
GSL-II	0±0	0.017±0.001	0.012±0.001	0.011±0.001	0.017±0.001
MAL-II	0.018±0.002	0.018±0	0.016±0	0.017±0.001	0.021±0.002
PHA-E	0.017±0.001	0.02±0.001	0.012±0	0.012±0.001	0.016±0.001
PTL-I	0.008±0.001	0.013±0	0.013±0	0.013±0.001	0.015±0
SJA	0.015±0.001	0.016±0.001	0.015±0.001	0.013±0.001	0.016±0.001
PNA	0.017±0.001	0.017±0.001	0.014±0.001	0.012±0.002	0.016±0.002
EEL	0.022±0.002	0.023±0.001	0.015±0.001	0.015±0.001	0.021±0.001
AAL	0.024±0.001	0.023±0.001	0.018±0.001	0.021±0.001	0.025±0.002
LTL	0.009±0.002	0.011±0	0.012±0.001	0.012±0.001	0.022±0.001
MPL	0.011±0.001	0.017±0.006	0.021±0.001	0.024±0.002	0.02±0.003
LEL	0.015±0.002	0.018±0	0.017±0.003	0.016±0	0.022±0
GSL-I	0.017±0.001	0.015±0.001	0.012±0.001	0.014±0	0.013±0.001
DBA	0.027±0.008	0.033±0.003	0.032±0.01	0.039±0.003	0.016±0.013
LCA	0.136±0.004	0.077±0.005	0.096±0.001	0.115±0.005	0.089±0.012
RCA120	0.055±0.005	0.053±0.021	0.052±0.003	0.049±0.002	0.056±0.006
STL	0.023±0.007	0.016±0.001	0.024±0.001	0.026±0	0.023±0.002
BS-I	0.013±0.004	0.001±0.001	0±0	0.008±0.001	0.006±0.003
ConA	0.077±0.004	0.073±0.003	0.073±0.003	0.068±0.007	0.064±0.005
PTL-II	0.02±0.012	0.024±0.001	0.025±0.002	0.021±0.004	0.023±0.001
DSA	0.034±0.002	0.047±0.002	0.041±0.008	0.048±0.002	0.044±0.007
SBA	0.001±0.002	0.004±0	0.005±0.001	0.004±0	0.009±0.002
VVA	0.018±0.002	0.016±0.002	0.014±0	0.012±0	0.014±0.001
NPA	0.02±0.001	0.019±0.003	0.024±0.004	0.026±0.002	0.026±0.001
PSA	0.02±0	0.022±0.001	0.019±0	0.016±0.003	0.019±0
ACA	0.024±0.001	0.024±0.001	0.02±0.001	0.019±0	0.02±0.001
WGA	0.031±0.001	0.033±0.001	0.032±0.002	0.028±0	0.026±0.001
UEA-I	0.004±0.001	0.035±0.017	0.021±0.01	0.008±0.002	0.016±0.002
PWM	0.015±0	0.024±0.001	0.024±0	0.017±0.001	0.02±0.001
MAL-I	0.018±0	0.02±0.001	0.02±0.001	0.009±0.002	0.02±0.001
GNA	0.032±0.001	0.037±0.002	0.037±0.001	0.037±0.001	0.035±0.002
BPL	0.024±0.003	0.033±0.002	0.037±0.002	0.03±0.003	0.028±0.003
PHA-E+L	0.019±0.001	0.024±0.001	0.023±0.001	0.018±0.001	0.021±0.001
SNA	0.032±0.002	0.03±0.001	0.033±0.001	0.028±0.001	0.027±0.001

## Sheet: Table S2
Supplementary Table 2. The clusters of the IGPs identified in the progression of SjLF.
Clusters	Glycopeptides	Control	I-1w	I-6w	I-11w	I-14w	Protein.Name
1	K.AAAQGLYN[+1914.697]NTYLTAVDEK.I-Fuc(2)Hex(5)HexNAc(4)	-6.18794	-0.784926	-5.21436	-6.01692	-5.60934	>tr|G1U2Q3|G1U2Q3_RABIT Apolipoprotein C-II OS=Oryctolagus cuniculus OX=9986 PE=3 SV=2
1	K.AC[+57.021]VILNHLNETMTLN[+4028.418]MTLEYGTQK.R-NeuAc(4)Fuc(1)Hex(8)HexNAc(7)	-6.18637	-0.745832	-5.59887	-6.48789	-5.86717	>tr|A0A5F9C1C5|A0A5F9C1C5_RABIT Uncharacterized protein OS=Oryctolagus cuniculus OX=9986 PE=3 SV=1
1	K.AEALC[+57.021]LSN[+1751.624]DTGLGLSPIASLR.A-NeuAc(1)Hex(4)HexNAc(4)	-5.66252	-0.435018	-5.86187	-6.34794	-6.39152	>tr|G1TR31|G1TR31_RABIT Uncharacterized protein OS=Oryctolagus cuniculus OX=9986 PE=3 SV=3
1	K.AFITN[+2350.830]FSMTIDGVTYPGK.V-NeuAc(2)Fuc(1)Hex(5)HexNAc(4)	-5.72431	-0.745832	-5.69294	-5.63563	-6.14917	>tr|G1TY29|G1TY29_RABIT Uncharacterized protein OS=Oryctolagus cuniculus OX=9986 GN=ITIH4 PE=4 SV=2
1	K.AHSTFQISMN[+1751.624]LSYTGSR.P-NeuAc(1)Hex(4)HexNAc(4)	-6.41312	-0.784926	-5.91837	-5.90858	-5.76901	>tr|G1SQ70|G1SQ70_RABIT Alpha-2-macroglobulin OS=Oryctolagus cuniculus OX=9986 GN=A2M PE=3 SV=3
1	K.AHSTFQISMN[+1751.624]LSYTGSRPISNMVIADVKMVSGFIALKPTVK.M-NeuAc(1)Hex(4)HexNAc(4)	-6.1245	-0.745832	-5.82303	-5.5689	-6.14585	>tr|G1SQ70|G1SQ70_RABIT Alpha-2-macroglobulin OS=Oryctolagus cuniculus OX=9986 GN=A2M PE=3 SV=3
1	K.AHSTFQISMN[+1971.719]LSYTGSR.P-Fuc(1)Hex(5)HexNAc(5)	-5.66999	-0.784926	-5.8884	-6.10354	-5.58604	>tr|G1SQ70|G1SQ70_RABIT Alpha-2-macroglobulin OS=Oryctolagus cuniculus OX=9986 GN=A2M PE=3 SV=3
1	K.AHSTFQISMN[+2352.846]LSYTGSRPISNMVIADVKMVSGFIALK.P-Hex(7)HexNAc(6)	-5.76944	-0.435018	-5.84195	-6.07249	-5.83745	>tr|G1SQ70|G1SQ70_RABIT Alpha-2-macroglobulin OS=Oryctolagus cuniculus OX=9986 GN=A2M PE=3 SV=3
1	K.AHSTFQISMN[+2569.905]LSYTGSRPISNMVIADVKMVSGFIALKPTVK.M-NeuAc(2)Hex(6)HexNAc(5)	-6.0337	-0.765241	-6.19442	-6.63597	-6.42203	>tr|G1SQ70|G1SQ70_RABIT Alpha-2-macroglobulin OS=Oryctolagus cuniculus OX=9986 GN=A2M PE=3 SV=3
1	K.AHTSFQISIN[+2204.772]VSYIGSR.Q-NeuAc(2)Hex(5)HexNAc(4)	-5.89766	-0.599015	-5.67173	-6.01113	-6.20864	>tr|G1TR31|G1TR31_RABIT Uncharacterized protein OS=Oryctolagus cuniculus OX=9986 PE=3 SV=3
1	K.ALLAFVIPALIIVVIN[+1216.423]VTITVVVITK.I-Hex(5)HexNAc(2)	-6.11017	-0.784926	-6.1564	-5.28811	-5.3786	>tr|U3KMR1|U3KMR1_RABIT Adhesion G protein-coupled receptor F5 OS=Oryctolagus cuniculus OX=9986 GN=ADGRF5 PE=3 SV=1
1	K.ALN[+1850.693]R.S-Fuc(1)Hex(3)HexNAc(6)	-5.82908	-0.745832	-5.78843	-5.70455	-5.97539	>sp|P15196|SHBG_RABIT Sex hormone-binding globulin OS=Oryctolagus cuniculus OX=9986 GN=SHBG PE=1 SV=2
1	K.ALQGPTSYHVMQISSFTN[+2100.761]STWTENR.G-NeuAc(1)Fuc(1)Hex(4)HexNAc(5)	-5.79308	-0.435018	-6.12766	-6.27757	-6.00597	>tr|A0A5F9CZW9|A0A5F9CZW9_RABIT Ig-like domain-containing protein OS=Oryctolagus cuniculus OX=9986 PE=4 SV=1
1	K.AN[+1257.449]K.S-Hex(4)HexNAc(3)	-6.54149	-0.784926	-6.02678	-6.18173	-5.91646	>tr|G1SIK0|G1SIK0_RABIT Antithrombin-III OS=Oryctolagus cuniculus OX=9986 GN=SERPINC1 PE=3 SV=1
1	K.AN[+1752.645]K.S-Fuc(2)Hex(4)HexNAc(4)	-5.95402	-0.745832	-6.03199	-5.66226	-6.30816	>tr|G1SIK0|G1SIK0_RABIT Antithrombin-III OS=Oryctolagus cuniculus OX=9986 GN=SERPINC1 PE=3 SV=1
1	K.AN[+2278.809]R.T-NeuAc(1)Hex(6)HexNAc(5)	-6.37609	-0.745832	-5.8576	-6.42105	-5.99899	>tr|A0A4Z2DLE9|A0A4Z2DLE9_SCHJA Kinesin-like protein OS=Schistosoma japonicum OX=6182 GN=EWB00_011339 PE=3 SV=1
1	K.AN[+2352.846]FTMK.G-Hex(7)HexNAc(6)	-6.13299	-0.435018	-5.95297	-6.3734	-6.19114	>tr|A0A5F9CIL5|A0A5F9CIL5_RABIT Complement C3d receptor 2 OS=Oryctolagus cuniculus OX=9986 GN=CR2 PE=4 SV=1
1	K.AQYDEKEN[+1913.677]LTVR.C-NeuAc(1)Hex(5)HexNAc(4)	-6.04055	-0.784926	-6.20704	-6.06971	-6.20256	>tr|A0A5F9CCJ6|A0A5F9CCJ6_RABIT Uncharacterized protein OS=Oryctolagus cuniculus OX=9986 PE=4 SV=1
1	K.AQYDEKEN[+1914.697]LTVR.C-Fuc(2)Hex(5)HexNAc(4)	-5.64657	-0.784926	-5.91773	-5.38218	-5.57799	>tr|A0A5F9CCJ6|A0A5F9CCJ6_RABIT Uncharacterized protein OS=Oryctolagus cuniculus OX=9986 PE=4 SV=1
1	K.AQYVEKEN[+2060.755]LTVR.C-Fuc(3)Hex(5)HexNAc(4)	-5.68107	-0.745832	-6.11424	-5.67864	-5.59367	>tr|A0A5F9CJA1|A0A5F9CJA1_RABIT Uncharacterized protein OS=Oryctolagus cuniculus OX=9986 PE=4 SV=1
1	K.ASALC[+57.021]LSN[+2204.772]DTGIGLSPIASLQAFQPFFVELTMPYSVIR.G-NeuAc(2)Hex(5)HexNAc(4)	-5.63764	-0.784926	-5.84623	-6.23187	-6.45789	>tr|G1SQ70|G1SQ70_RABIT Alpha-2-macroglobulin OS=Oryctolagus cuniculus OX=9986 GN=A2M PE=3 SV=3
1	K.ASALC[+57.021]LSN[+2262.814]DTGIGLSPIASLQAFQPFFVELTMPYSVIR.G-NeuAc(1)Fuc(1)Hex(5)HexNAc(5)	-5.65188	-0.745832	-6.53016	-5.88665	-6.11739	>tr|G1SQ70|G1SQ70_RABIT Alpha-2-macroglobulin OS=Oryctolagus cuniculus OX=9986 GN=A2M PE=3 SV=3
1	K.AVAGN[+2262.814]ISDPGLQKSFLDSGYR.I-NeuAc(1)Fuc(1)Hex(5)HexNAc(5)	-6.18611	-0.745832	-5.99177	-5.52978	-5.79583	>tr|A0A5F9C3B7|A0A5F9C3B7_RABIT Metavinculin OS=Oryctolagus cuniculus OX=9986 GN=VCL PE=3 SV=1
1	K.C[+57.021]C[+57.021]LSLSHLN[+2133.772]ETVTVSASIVSHSGTISLFDDLVADK.D-Fuc(1)Hex(6)HexNAc(5)	-6.27328	-0.784926	-5.91074	-6.01372	-5.82353	>tr|G1TR31|G1TR31_RABIT Uncharacterized protein OS=Oryctolagus cuniculus OX=9986 PE=3 SV=3
1	K.C[+57.021]IRVN[+1565.560]STGKC[+57.021]GPPPPIENGDITSLSLPVYTSGSSVEYQC[+57.021]QSLYR.L-Fuc(1)Hex(5)HexNAc(3)	-6.2045	-0.435018	-5.97404	-0.755305	-6.46478	>tr|A0A5F9CSQ9|A0A5F9CSQ9_RABIT Uncharacterized protein OS=Oryctolagus cuniculus OX=9986 PE=4 SV=1
1	K.C[+57.021]VVPDSIASETN[+1914.697]LSSK.N-Fuc(2)Hex(5)HexNAc(4)	-5.90803	-0.784926	-5.73522	-5.96406	-6.41745	>tr|A0A5F9CG95|A0A5F9CG95_RABIT Uncharacterized protein OS=Oryctolagus cuniculus OX=9986 PE=4 SV=1
1	K.DIHVVHFHGQTLLEN[+1540.529]GTQQHQLGVWPLLPGSFNTVEMK.A-Hex(7)HexNAc(2)	-6.46093	-0.745832	-5.93153	-6.03947	-5.74348	>tr|A0A5F9DND9|A0A5F9DND9_RABIT Coagulation factor V OS=Oryctolagus cuniculus OX=9986 GN=F5 PE=3 SV=1
1	K.DIHVVHFHGQTLLEN[+1702.581]GTQQHQLGVWPLLPGSFNTVEMK.A-Hex(8)HexNAc(2)	-6.15848	0.176398772369551	-5.66848	-5.87783	-6.89933	>tr|A0A5F9DND9|A0A5F9DND9_RABIT Coagulation factor V OS=Oryctolagus cuniculus OX=9986 GN=F5 PE=3 SV=1
1	K.DILN[+1378.476]GTFSYK.T-Hex(6)HexNAc(2)	-6.19563	-0.745832	-6.09491	-6.33821	-6.7085	>tr|A0A5F9D8X7|A0A5F9D8X7_RABIT Fibroblast activation protein alpha OS=Oryctolagus cuniculus OX=9986 GN=FAP PE=4 SV=1
1	K.DILN[+1702.581]GTFSYK.T-Hex(8)HexNAc(2)	-6.01707	-0.581775	-6.22833	-6.20321	-6.25664	>tr|A0A5F9D8X7|A0A5F9D8X7_RABIT Fibroblast activation protein alpha OS=Oryctolagus cuniculus OX=9986 GN=FAP PE=4 SV=1
1	K.DILN[+892.317]GTFSYK.T-Hex(3)HexNAc(2)	-6.57431	-0.745832	-6.11629	-5.78384	-5.66036	>tr|A0A5F9D8X7|A0A5F9D8X7_RABIT Fibroblast activation protein alpha OS=Oryctolagus cuniculus OX=9986 GN=FAP PE=4 SV=1
1	K.DINN[+1914.697]VTYVWGIVSWGENC[+57.021]GKPEFPGVYTK.V-Fuc(2)Hex(5)HexNAc(4)	-6.49949	-0.435018	-6.70524	-6.53929	-5.7499	>tr|A0A5F9CAP0|A0A5F9CAP0_RABIT Uncharacterized protein OS=Oryctolagus cuniculus OX=9986 PE=4 SV=1
1	K.DLKPEDFELLC[+57.021]LN[+1914.697]GTR.K-Fuc(2)Hex(5)HexNAc(4)	-6.22525	0.176398772369551	-5.86135	-5.70578	-5.88979	>tr|G1TKE4|G1TKE4_RABIT Uncharacterized protein OS=Oryctolagus cuniculus OX=9986 PE=3 SV=1
1	K.DNMHYIEYSFHLGNHESN[+2204.772]YTVHLAQISGNVPTALPEHK.D-NeuAc(2)Hex(5)HexNAc(4)	-5.86494	-0.745832	-6.06319	-6.45491	-5.72333	>tr|G1SEB2|G1SEB2_RABIT Angiopoietin like 3 OS=Oryctolagus cuniculus OX=9986 GN=ANGPTL3 PE=4 SV=1
1	K.DTIIKPLLVEPEGLEKEETFNSLLC[+57.021]PSGGELSYQLFLELPLNVVN[+1914.697]ESAR.A-Fuc(2)Hex(5)HexNAc(4)	-6.09542	-0.745832	-6.29992	-5.64607	-5.82985	>tr|G1SQ70|G1SQ70_RABIT Alpha-2-macroglobulin OS=Oryctolagus cuniculus OX=9986 GN=A2M PE=3 SV=3
1	K.DTIIKPLLVEPEGLEKEETFNSLLC[+57.021]PSGGELSYQLFLELPLNVVN[+2206.813]ESAR.A-Fuc(4)Hex(5)HexNAc(4)	-6.44624	-0.784926	-6.28312	-5.6647	-6.20031	>tr|G1SQ70|G1SQ70_RABIT Alpha-2-macroglobulin OS=Oryctolagus cuniculus OX=9986 GN=A2M PE=3 SV=3
1	K.EAPYFYN[+2060.755]DSVTFEC[+57.021]NPGFTLK.G-Fuc(3)Hex(5)HexNAc(4)	-5.87247	-0.435018	-6.45435	-6.2423	-5.76228	>tr|A0A5F9CIL5|A0A5F9CIL5_RABIT Complement C3d receptor 2 OS=Oryctolagus cuniculus OX=9986 GN=CR2 PE=4 SV=1
1	K.EC[+57.021]FNMLIASN[+2717.978]R.S-Hex(8)HexNAc(7)	-6.07159	-0.435018	-6.48571	-5.96564	-6.0624	>tr|A0A5F9CT93|A0A5F9CT93_RABIT Uncharacterized protein OS=Oryctolagus cuniculus OX=9986 PE=3 SV=1
1	K.EDFPFALGVQTLPQTC[+57.021]DGPKAHSTFQISMN[+2204.772]LSYTGSRPISNMVIADVKMVSGFIALKPTVK.M-NeuAc(2)Hex(5)HexNAc(4)	-6.18577	-0.745832	-6.11646	-5.61026	-6.2377	>tr|G1SQ70|G1SQ70_RABIT Alpha-2-macroglobulin OS=Oryctolagus cuniculus OX=9986 GN=A2M PE=3 SV=3
1	K.EEDFHVN[+1914.697]ATTTVR.V-Fuc(2)Hex(5)HexNAc(4)	-5.33817	-0.745832	-6.47851	-6.24268	-5.60205	>tr|A0A5F9DT67|A0A5F9DT67_RABIT SERPIN domain-containing protein OS=Oryctolagus cuniculus OX=9986 GN=SERPINA1 PE=3 SV=1
1	K.EGEN[+1768.640]ITITC[+57.021]K.T-Fuc(1)Hex(5)HexNAc(4)	-5.30761	-0.435018	-6.41179	-5.56557	-5.88142	>tr|A0A5F9CF37|A0A5F9CF37_RABIT Uncharacterized protein OS=Oryctolagus cuniculus OX=9986 GN=VCAM1 PE=4 SV=1
1	K.EHEGAIYPDN[+1519.555]TTAFQK.A-Fuc(2)Pent(1)Hex(3)HexNAc(3)	-5.8629	-0.435018	-6.29746	-0.835796	-5.5425	>tr|A0A5F9CI66|A0A5F9CI66_RABIT Ceruloplasmin OS=Oryctolagus cuniculus OX=9986 GN=CP PE=3 SV=1
1	K.EHEGAIYPDN[+1711.618]TTAFQKADDK.V-Fuc(2)Hex(5)HexNAc(3)	-6.1002	-0.784926	-6.31918	-6.07468	-6.17126	>tr|G1SJX3|G1SJX3_RABIT Ceruloplasmin OS=Oryctolagus cuniculus OX=9986 GN=CP PE=3 SV=1
1	K.EHEGAIYPDN[+2457.877]TTAFQKADDKVLPGER.Y-Fuc(1)Hex(8)HexNAc(5)	-6.3694	-0.435018	-6.25147	-5.41499	-6.38368	>tr|A0A5F9CI66|A0A5F9CI66_RABIT Ceruloplasmin OS=Oryctolagus cuniculus OX=9986 GN=CP PE=3 SV=1
1	K.EHEGAIYPDN[+3517.228]TTAFQK.A-NeuAc(4)Hex(7)HexNAc(6)	-5.93402	-0.745832	-5.80237	-6.07279	-5.75744	>tr|G1SJX3|G1SJX3_RABIT Ceruloplasmin OS=Oryctolagus cuniculus OX=9986 GN=CP PE=3 SV=1
1	K.EKPIPN[+2206.813]KTVFVSVDAHAHQLSFTTNER.G-Fuc(4)Hex(5)HexNAc(4)	-6.04763	-0.784926	-5.8644	-6.3012	-6.00216	>tr|A0A5F9C1C5|A0A5F9C1C5_RABIT Uncharacterized protein OS=Oryctolagus cuniculus OX=9986 PE=3 SV=1
1	K.ELHHLQEQN[+1913.677]VSNPFLDKEEFYIGSKYK.K-NeuAc(1)Hex(5)HexNAc(4)	-6.12906	-0.784926	-5.76001	-6.45717	-6.15581	>tr|G1SJX3|G1SJX3_RABIT Ceruloplasmin OS=Oryctolagus cuniculus OX=9986 GN=CP PE=3 SV=1
1	K.EN[+1913.677]LTVR.C-NeuAc(1)Hex(5)HexNAc(4)	0.145805118190613	0.515828601177014	0.285488893648089	0.154581324850378	0.242775948696157	>tr|A0A5F9CJA1|A0A5F9CJA1_RABIT Uncharacterized protein OS=Oryctolagus cuniculus OX=9986 PE=4 SV=1
1	K.EVDEQMLAIQSKN[+2204.772]SSYFVEWIPNNVK.V-NeuAc(2)Hex(5)HexNAc(4)	-5.84697	-0.745832	-5.39818	-5.84536	-5.73777	>tr|G1U5S4|G1U5S4_RABIT Tubulin beta chain OS=Oryctolagus cuniculus OX=9986 PE=3 SV=2
1	K.EVDEQMLAIQSKN[+2861.000]SSYFVEWIPNNVKVAVC[+57.021]DIPPR.G-NeuAc(3)Hex(6)HexNAc(5)	-6.04931	-0.784926	-6.23638	-6.08334	-5.90242	>tr|G1U5S4|G1U5S4_RABIT Tubulin beta chain OS=Oryctolagus cuniculus OX=9986 PE=3 SV=2
1	K.EVDEQMLNVQNKN[+3517.228]SSYFVEWIPNNVK.T-NeuAc(4)Hex(7)HexNAc(6)	-5.87379	-0.435018	-6.60307	-6.23495	-6.22376	>tr|A0A4Z2CPU0|A0A4Z2CPU0_SCHJA Tubulin beta chain OS=Schistosoma japonicum OX=6182 GN=EWB00_008460 PE=3 SV=1
1	K.EVVSLTEDC[+57.021]C[+57.021]AEDADPGC[+57.021]YDN[+1710.598]R.T-NeuAc(1)Hex(5)HexNAc(3)	-5.54408	-0.745832	-5.86618	-5.81329	-5.64798	>tr|G1SU82|G1SU82_RABIT Gc-globulin OS=Oryctolagus cuniculus OX=9986 GN=GC PE=4 SV=2
1	K.EVVSLTEDC[+57.021]C[+57.021]AEDADPGC[+57.021]YDN[+2204.772]R.T-NeuAc(2)Hex(5)HexNAc(4)	4.50815518816771	5.23918089565169	4.47077005057481	4.20028289151622	4.7357043950909	>tr|G1SU82|G1SU82_RABIT Gc-globulin OS=Oryctolagus cuniculus OX=9986 GN=GC PE=4 SV=2
1	K.EVVSLTEDC[+57.021]C[+57.021]AEDADPGC[+57.021]YDN[+2206.813]R.T-Fuc(4)Hex(5)HexNAc(4)	-6.09262	0.196143475982252	-5.84382	-5.42461	-5.81872	>tr|G1SU82|G1SU82_RABIT Gc-globulin OS=Oryctolagus cuniculus OX=9986 GN=GC PE=4 SV=2
1	K.EVVSLTEDC[+57.021]C[+57.021]AEDADPGC[+57.021]YDN[+2861.000]R.T-NeuAc(3)Hex(6)HexNAc(5)	-5.80733	0.779072688077658	-6.1871	-5.91816	-6.06252	>tr|G1SU82|G1SU82_RABIT Gc-globulin OS=Oryctolagus cuniculus OX=9986 GN=GC PE=4 SV=2
1	K.EVVSLTEDC[+57.021]C[+57.021]TEDADPGC[+57.021]YDN[+1913.677]R.T-NeuAc(1)Hex(5)HexNAc(4)	-6.01341	-0.745832	-6.17178	-5.41052	-6.60466	>sp|P53789|VTDB_RABIT Vitamin D-binding protein OS=Oryctolagus cuniculus OX=9986 GN=GC PE=2 SV=1
1	K.EVVSLTEDC[+57.021]C[+57.021]TEDADPGC[+57.021]YDN[+2190.793]R.T-Hex(6)HexNAc(6)	-6.51997	1.14484369665732	-5.90625	-6.40013	-6.31047	>sp|P53789|VTDB_RABIT Vitamin D-binding protein OS=Oryctolagus cuniculus OX=9986 GN=GC PE=2 SV=1
1	K.EVVSLTEDC[+57.021]C[+57.021]TEDADPGC[+57.021]YDN[+2204.772]R.T-NeuAc(2)Hex(5)HexNAc(4)	-5.99936	0.205911868863469	-6.21223	-5.9868	-6.06092	>sp|P53789|VTDB_RABIT Vitamin D-binding protein OS=Oryctolagus cuniculus OX=9986 GN=GC PE=2 SV=1
1	K.EVVTDEN[+1063.407]K.S-Fuc(2)Hex(1)HexNAc(3)	-6.18909	-0.745832	-5.84364	-6.12431	-5.93867	>tr|G1T6S4|G1T6S4_RABIT Dystonin OS=Oryctolagus cuniculus OX=9986 GN=DST PE=3 SV=3
1	K.EYVLPSFEVQLTPN[+2204.772]K.T-NeuAc(2)Hex(5)HexNAc(4)	-0.629762	-0.1967	-5.86554	-0.835796	-6.07753	>tr|G1SYK4|G1SYK4_RABIT Uncharacterized protein OS=Oryctolagus cuniculus OX=9986 PE=4 SV=2
1	K.FEVQVKVPKVITILEEEVN[+2569.905]VSVC[+57.021]GIYTYGK.P-NeuAc(2)Hex(6)HexNAc(5)	-6.09934	-0.435018	-6.06198	-5.5748	-5.53694	>tr|G1TR31|G1TR31_RABIT Uncharacterized protein OS=Oryctolagus cuniculus OX=9986 PE=3 SV=3
1	K.FHDVSESTHWTPFLN[+1751.624]ASIHYIHENYPFPWEK.D-NeuAc(1)Hex(4)HexNAc(4)	-6.48165	-0.784926	-5.3843	-6.30912	-5.93915	>tr|G1SD43|G1SD43_RABIT Glycosyl-phosphatidylinositol-specific phospholipase D OS=Oryctolagus cuniculus OX=9986 GN=GPLD1 PE=3 SV=3
1	K.FN[+1548.545]VSLK.Y-NeuAc(1)Hex(4)HexNAc(3)	-5.65111	-0.745832	-5.88979	-5.99656	-5.83704	>tr|A0A5F9CAP0|A0A5F9CAP0_RABIT Uncharacterized protein OS=Oryctolagus cuniculus OX=9986 PE=4 SV=1
1	K.FN[+1914.697]SSYFQGTNQITGR.Y-Fuc(2)Hex(5)HexNAc(4)	-6.04984	-0.745832	-5.96683	-5.73507	-6.281	>tr|G1U9R4|G1U9R4_RABIT Apolipoprotein B OS=Oryctolagus cuniculus OX=9986 GN=APOB PE=4 SV=2
1	K.FN[+1955.724]LTETAEAQIHDGFR.H-Fuc(2)Hex(4)HexNAc(5)	-5.69386	-0.765241	-6.14599	-5.58639	-5.87883	>tr|G1TGM8|G1TGM8_RABIT SERPIN domain-containing protein OS=Oryctolagus cuniculus OX=9986 GN=SERPINA1 PE=3 SV=1
1	K.FN[+2247.840]LTETAEAQIHDGFR.H-Fuc(4)Hex(4)HexNAc(5)	-6.0209	-0.435018	-6.07436	-5.82957	-6.00942	>tr|G1TGM8|G1TGM8_RABIT SERPIN domain-containing protein OS=Oryctolagus cuniculus OX=9986 GN=SERPINA1 PE=3 SV=1
1	K.FN[+2263.835]LTETAEAQIHDGFR.H-Fuc(3)Hex(5)HexNAc(5)	-6.0743	-0.599015	-5.61116	-6.17833	-6.12243	>tr|G1TGM8|G1TGM8_RABIT SERPIN domain-containing protein OS=Oryctolagus cuniculus OX=9986 GN=SERPINA1 PE=3 SV=1
1	K.FN[+2861.000]LTETPEMEIHWGFQQLLSALR.Q-NeuAc(3)Hex(6)HexNAc(5)	-6.72093	-0.745832	-6.10161	-5.84741	-6.04639	>tr|G1TM88|G1TM88_RABIT Serpin family A member 3 OS=Oryctolagus cuniculus OX=9986 GN=SERPINA3 PE=3 SV=2
1	K.GAFISN[+1987.714]FSMTIDGTTFTSSIK.E-Hex(6)HexNAc(5)	-6.11677	-0.435018	-6.26588	-6.18607	-5.7992	>tr|A0A5F9CLB6|A0A5F9CLB6_RABIT Inter-alpha-trypsin inhibitor heavy chain 2 OS=Oryctolagus cuniculus OX=9986 GN=ITIH2 PE=3 SV=1
1	K.GATYRDLESWTDGC[+57.021]NNC[+57.021]TC[+57.021]LN[+2204.772]GTVQC[+57.021]ETLAC[+57.021]PVPEC[+57.021]PLKSAPAYVDGR.C-NeuAc(2)Hex(5)HexNAc(4)	-5.74278	-0.784926	-5.34825	-5.93166	-6.44831	>tr|A0A5F9CP03|A0A5F9CP03_RABIT Neural EGFL like 2 OS=Oryctolagus cuniculus OX=9986 GN=NELL2 PE=4 SV=1
1	K.GC[+57.021]LLLSQLN[+2206.813]ETVTVTASLEALR.E-Fuc(4)Hex(5)HexNAc(4)	-5.91898	-0.745832	-5.68878	-5.79932	-6.35526	>tr|G1SQ70|G1SQ70_RABIT Alpha-2-macroglobulin OS=Oryctolagus cuniculus OX=9986 GN=A2M PE=3 SV=3
1	K.GDSGGPLVC[+57.021]KDINN[+1227.439]VTYVWGIVSWGENC[+57.021]GKPEFPGVYTK.V-Pent(1)Hex(3)HexNAc(3)	-6.35673	-0.435018	-6.14228	-6.02374	-6.14731	>tr|A0A5F9CAP0|A0A5F9CAP0_RABIT Uncharacterized protein OS=Oryctolagus cuniculus OX=9986 PE=4 SV=1
1	K.GELN[+1548.545]STFFSSR.A-NeuAc(1)Hex(4)HexNAc(3)	-6.28195	-0.784926	-6.22876	-6.16318	-6.27042	>tr|G1T0U8|G1T0U8_RABIT Prenylcysteine oxidase 1 OS=Oryctolagus cuniculus OX=9986 GN=PCYOX1 PE=3 SV=2
1	K.GELN[+1751.624]STFFSSR.A-NeuAc(1)Hex(4)HexNAc(4)	-6.07768	-0.784926	-6.17178	-5.9971	-5.96216	>tr|G1T0U8|G1T0U8_RABIT Prenylcysteine oxidase 1 OS=Oryctolagus cuniculus OX=9986 GN=PCYOX1 PE=3 SV=2
1	K.GELN[+1913.677]STFFSSR.A-NeuAc(1)Hex(5)HexNAc(4)	-0.629762	-0.280872	-0.668729	-0.416012	-0.684957	>tr|G1T0U8|G1T0U8_RABIT Prenylcysteine oxidase 1 OS=Oryctolagus cuniculus OX=9986 GN=PCYOX1 PE=3 SV=2
1	K.GELN[+1913.677]STFFSSRAK.D-NeuAc(1)Hex(5)HexNAc(4)	-5.88169	-0.745832	-6.33831	-6.13924	-6.22954	>tr|G1T0U8|G1T0U8_RABIT Prenylcysteine oxidase 1 OS=Oryctolagus cuniculus OX=9986 GN=PCYOX1 PE=3 SV=2
1	K.GHNAQNN[+1914.697]VSQNVFLGHTNVEEIMK.L-Fuc(2)Hex(5)HexNAc(4)	-6.68674	-0.435018	-6.55175	-6.00336	-6.22984	>tr|G1T7H9|G1T7H9_RABIT Complement C1r OS=Oryctolagus cuniculus OX=9986 GN=C1R PE=4 SV=2
1	K.GHNAQNN[+2059.735]VSQNVFLGHTNVEEIMK.L-NeuAc(1)Fuc(1)Hex(5)HexNAc(4)	-5.7777	-0.745832	-5.85065	-5.60463	-6.09132	>tr|G1T7H9|G1T7H9_RABIT Complement C1r OS=Oryctolagus cuniculus OX=9986 GN=C1R PE=4 SV=2
1	K.GHNAQNN[+2060.755]VSQNVFLGHTNVEEIMK.L-Fuc(3)Hex(5)HexNAc(4)	-6.39487	-0.745832	-5.84806	-6.29483	-5.71648	>tr|G1T7H9|G1T7H9_RABIT Complement C1r OS=Oryctolagus cuniculus OX=9986 GN=C1R PE=4 SV=2
1	K.GIDN[+1913.677]GSEDLEILPNGLAFISSGLK.Y-NeuAc(1)Hex(5)HexNAc(4)	-6.12226	0.779072688077658	-5.81252	-6.57955	-5.91351	>tr|A0A5F9DIH2|A0A5F9DIH2_RABIT Serum paraoxonase/arylesterase 1 OS=Oryctolagus cuniculus OX=9986 GN=PON1 PE=3 SV=1
1	K.GIDN[+1914.697]GSEDLEILPNGLAFISSGLK.Y-Fuc(2)Hex(5)HexNAc(4)	-5.60272	-0.784926	-6.89426	-6.55745	-5.99044	>tr|A0A5F9DIH2|A0A5F9DIH2_RABIT Serum paraoxonase/arylesterase 1 OS=Oryctolagus cuniculus OX=9986 GN=PON1 PE=3 SV=1
1	K.GIDN[+2204.772]GSEDLEILPNGLAFISSGLK.Y-NeuAc(2)Hex(5)HexNAc(4)	-0.166109	0.976729913210185	-5.43392	-0.61153	-6.23768	>tr|A0A5F9DIH2|A0A5F9DIH2_RABIT Serum paraoxonase/arylesterase 1 OS=Oryctolagus cuniculus OX=9986 GN=PON1 PE=3 SV=1
1	K.GIPMPN[+2457.877]K.T-Fuc(1)Hex(8)HexNAc(5)	-6.42788	0.0884737366968349	-5.9367	-5.58494	-6.22863	>tr|G1SQ70|G1SQ70_RABIT Alpha-2-macroglobulin OS=Oryctolagus cuniculus OX=9986 GN=A2M PE=3 SV=3
1	K.GKWEKPFEPENTKEEDFHVN[+2262.814]ATTTVR.V-NeuAc(1)Fuc(1)Hex(5)HexNAc(5)	-6.09174	-0.435018	-6.04103	-6.48324	-6.31932	>tr|A0A5F9DT67|A0A5F9DT67_RABIT SERPIN domain-containing protein OS=Oryctolagus cuniculus OX=9986 GN=SERPINA1 PE=3 SV=1
1	K.GN[+1024.359]YS.Q-Pent(1)Hex(3)HexNAc(2)	-5.4086	-0.745832	-5.79597	-6.00831	-6.0114	>tr|Q5C7J7|Q5C7J7_SCHJA SJCHGC07444 protein (Fragment) OS=Schistosoma japonicum OX=6182 PE=2 SV=2
1	K.GN[+2204.772]ATALFLLPDEGKLQHLEHTLTTELIAKFLAK.S-NeuAc(2)Hex(5)HexNAc(4)	-5.97511	-0.784926	-5.69353	-5.83793	-5.91107	>tr|Q28666|Q28666_RABIT Alpha-1-antitrypsin OS=Oryctolagus cuniculus OX=9986 PE=2 SV=1
1	K.GN[+2206.813]ATALFLLPDEGKLQHLEHTLTTELIAKFLAK.S-Fuc(4)Hex(5)HexNAc(4)	-6.30736	-0.784926	-6.06103	-5.76885	-6.29392	>tr|Q28666|Q28666_RABIT Alpha-1-antitrypsin OS=Oryctolagus cuniculus OX=9986 PE=2 SV=1
1	K.GN[+2262.814]ATALFLLPDEGK.L-NeuAc(1)Fuc(1)Hex(5)HexNAc(5)	-6.13624	-0.646255	-6.48969	-5.61349	-5.93136	>tr|G1TGM8|G1TGM8_RABIT SERPIN domain-containing protein OS=Oryctolagus cuniculus OX=9986 GN=SERPINA1 PE=3 SV=1
1	K.GNC[+57.021]IQAN[+2204.772]YSLMENGNIK.V-NeuAc(2)Hex(5)HexNAc(4)	-5.55089	-0.745832	-5.73742	-5.45564	-6.13525	>sp|P37153|APOD_RABIT Apolipoprotein D OS=Oryctolagus cuniculus OX=9986 GN=APOD PE=2 SV=1
1	K.GVN[+1606.587]DTLLVNELK.S-Fuc(1)Hex(4)HexNAc(4)	-5.85539	-0.784926	-5.48128	-6.42368	-5.97753	>tr|A0A5F9C343|A0A5F9C343_RABIT Periostin OS=Oryctolagus cuniculus OX=9986 GN=POSTN PE=4 SV=1
1	K.GVPIPN[+1710.598]ETIFIQAYSANFFLK.A-NeuAc(1)Hex(5)HexNAc(3)	-6.10602	-0.745832	-5.55272	-5.95449	-6.04817	>tr|A0A5F9DI97|A0A5F9DI97_RABIT Uncharacterized protein OS=Oryctolagus cuniculus OX=9986 PE=3 SV=1
1	K.GVPIPN[+2206.813]ETIFIQAHSANFFLK.A-Fuc(4)Hex(5)HexNAc(4)	-6.09813	-0.784926	-6.35926	-5.91519	-5.87727	>tr|G1TR31|G1TR31_RABIT Uncharacterized protein OS=Oryctolagus cuniculus OX=9986 PE=3 SV=3
1	K.HAN[+1298.476]WTLTPLK.S-Hex(3)HexNAc(4)	-6.10028	-0.784926	-5.2549	-5.94725	-6.06858	>sp|P27170|PON1_RABIT Serum paraoxonase/arylesterase 1 OS=Oryctolagus cuniculus OX=9986 GN=PON1 PE=1 SV=2
1	K.HAN[+1809.666]WTLTPLK.S-Fuc(1)Hex(4)HexNAc(5)	-5.99868	0.176398772369551	-6.02687	-6.23729	-6.40513	>sp|P27170|PON1_RABIT Serum paraoxonase/arylesterase 1 OS=Oryctolagus cuniculus OX=9986 GN=PON1 PE=1 SV=2
1	K.HAN[+1913.677]WTLTPLK.S-NeuAc(1)Hex(5)HexNAc(4)	2.23271446609957	2.54358069844678	1.33993474459849	2.06907784314615	1.94712347345858	>sp|P27170|PON1_RABIT Serum paraoxonase/arylesterase 1 OS=Oryctolagus cuniculus OX=9986 GN=PON1 PE=1 SV=2
1	K.HAN[+1955.724]WTLTPLK.S-Fuc(2)Hex(4)HexNAc(5)	-6.1057	-0.435018	-5.93975	-5.90084	-6.15491	>sp|P27170|PON1_RABIT Serum paraoxonase/arylesterase 1 OS=Oryctolagus cuniculus OX=9986 GN=PON1 PE=1 SV=2
1	K.HAN[+1971.719]WTLTPLK.S-Fuc(1)Hex(5)HexNAc(5)	-6.15891	-0.784926	-6.07961	-6.24521	-6.49203	>sp|P27170|PON1_RABIT Serum paraoxonase/arylesterase 1 OS=Oryctolagus cuniculus OX=9986 GN=PON1 PE=1 SV=2
1	K.HAN[+2117.777]WTLTPLK.S-Fuc(2)Hex(5)HexNAc(5)	-5.77812	-0.784926	-6.06413	-6.13204	-5.81113	>sp|P27170|PON1_RABIT Serum paraoxonase/arylesterase 1 OS=Oryctolagus cuniculus OX=9986 GN=PON1 PE=1 SV=2
1	K.HAN[+2204.772]WTLTPLK.S-NeuAc(2)Hex(5)HexNAc(4)	2.30490504773925	2.39567212791724	1.51580006018229	2.33595993614903	1.58318574695169	>sp|P27170|PON1_RABIT Serum paraoxonase/arylesterase 1 OS=Oryctolagus cuniculus OX=9986 GN=PON1 PE=1 SV=2
1	K.HAN[+2569.905]WTLTPLK.S-NeuAc(2)Hex(6)HexNAc(5)	-0.778432	0.515828601177014	-0.361877	0.154581324850378	-0.70885	>sp|P27170|PON1_RABIT Serum paraoxonase/arylesterase 1 OS=Oryctolagus cuniculus OX=9986 GN=PON1 PE=1 SV=2
1	K.HSVYDTTN[+1907.714]R.T-Hex(3)HexNAc(7)	-5.79682	-0.784926	-5.88296	-6.19442	-5.93926	>tr|G1T6S4|G1T6S4_RABIT Dystonin OS=Oryctolagus cuniculus OX=9986 GN=DST PE=3 SV=3
1	K.HVFSLN[+2204.772]K.S-NeuAc(2)Hex(5)HexNAc(4)	0.879275747017967	1.76948252033544	1.02419691140189	1.13312995076014	1.07449837803897	>tr|G1TR31|G1TR31_RABIT Uncharacterized protein OS=Oryctolagus cuniculus OX=9986 PE=3 SV=3
1	K.HYLVWGLSSDLWGEKPN[+2204.772]TSYIIGK.D-NeuAc(2)Hex(5)HexNAc(4)	1.39414651597757	2.24681750121698	0.724669985863478	0.911023264763119	0.000753419365710929	>tr|G1STJ4|G1STJ4_RABIT Complement C3 alpha chain OS=Oryctolagus cuniculus OX=9986 PE=4 SV=3
1	K.IHVYEKHAN[+2278.809]WTLTPLK.S-NeuAc(1)Hex(6)HexNAc(5)	-6.05858	-0.745832	-5.57412	-6.17311	-5.93632	>sp|P27170|PON1_RABIT Serum paraoxonase/arylesterase 1 OS=Oryctolagus cuniculus OX=9986 GN=PON1 PE=1 SV=2
1	K.IIIHENYN[+1913.677]GTTYQNDIALIEMK.K-NeuAc(1)Hex(5)HexNAc(4)	-5.6058	0.50222793774012	-5.84228	-5.98017	-6.27458	>tr|A0A5F9CAP0|A0A5F9CAP0_RABIT Uncharacterized protein OS=Oryctolagus cuniculus OX=9986 PE=4 SV=1
1	K.IIIHENYN[+2204.772]GTTYQNDIALIEMK.K-NeuAc(2)Hex(5)HexNAc(4)	1.0476355564619	1.93062961821138	-0.299481	0.720905141952565	-0.116839	>tr|A0A5F9CAP0|A0A5F9CAP0_RABIT Uncharacterized protein OS=Oryctolagus cuniculus OX=9986 PE=4 SV=1
1	K.IITFLEEEVN[+1711.618]VSVC[+57.021]GIYTYGK.A-Fuc(2)Hex(5)HexNAc(3)	-6.0508	-0.784926	-6.108	-5.89501	-6.13321	>tr|G1SQ70|G1SQ70_RABIT Alpha-2-macroglobulin OS=Oryctolagus cuniculus OX=9986 GN=A2M PE=3 SV=3
1	K.IMPLEDMNEFTAHILEVVNAHMMLN[+2204.772]K.S-NeuAc(2)Hex(5)HexNAc(4)	-6.40899	-0.435018	-6.12339	-6.10556	-5.82668	>tr|G1TB40|G1TB40_RABIT Replication protein A2 OS=Oryctolagus cuniculus OX=9986 GN=RPA2 PE=3 SV=2
1	K.IN[+1316.475]R.T-Fuc(2)Pent(1)Hex(3)HexNAc(2)	-6.11662	-0.435018	-5.67872	-6.25832	-5.92127	>tr|A0A4Z2DIC3|A0A4Z2DIC3_SCHJA Phosphatidylinositol-binding clathrin assembly protein (Fragment) OS=Schistosoma japonicum OX=6182 GN=EWB00_000622 PE=3 SV=1
1	K.IN[+2350.830]R.T-NeuAc(2)Fuc(1)Hex(5)HexNAc(4)	-6.02065	-0.435018	-5.68595	-6.1199	-5.65792	>tr|A0A4Z2DIC3|A0A4Z2DIC3_SCHJA Phosphatidylinositol-binding clathrin assembly protein (Fragment) OS=Schistosoma japonicum OX=6182 GN=EWB00_000622 PE=3 SV=1
1	K.ISSVVGEYN[+1913.677]K.S-NeuAc(1)Hex(5)HexNAc(4)	-6.63881	-0.745832	-6.75219	-6.20237	-5.96905	>tr|A0A4Z2CSE3|A0A4Z2CSE3_SCHJA Uncharacterized protein OS=Schistosoma japonicum OX=6182 GN=EWB00_007940 PE=4 SV=1
1	K.ISSVVGEYN[+2204.772]K.S-NeuAc(2)Hex(5)HexNAc(4)	-5.89655	1.48959165908253	-5.90146	-5.60573	-5.72837	>tr|A0A4Z2CSE3|A0A4Z2CSE3_SCHJA Uncharacterized protein OS=Schistosoma japonicum OX=6182 GN=EWB00_007940 PE=4 SV=1
1	K.ISVSMSYSNVTFC[+57.021]C[+57.021]NKWHHVAVNQN[+917.349]QTLITAYLDNSLILSK.D-Fuc(1)Hex(1)HexNAc(3)	-6.57149	-0.435018	-5.66508	-6.09882	-6.12441	>tr|G1U0E3|G1U0E3_RABIT Uncharacterized protein OS=Oryctolagus cuniculus OX=9986 PE=4 SV=3
1	K.IYLKGVN[+2278.809]DTLLVNELK.S-NeuAc(1)Hex(6)HexNAc(5)	-5.81531	0.176398772369551	-5.62291	-6.33649	-5.62324	>tr|A0A5F9C343|A0A5F9C343_RABIT Periostin OS=Oryctolagus cuniculus OX=9986 GN=POSTN PE=4 SV=1
1	K.IYLKGVN[+2553.910]DTLLVNELK.S-NeuAc(2)Fuc(1)Hex(5)HexNAc(5)	-5.6725	-0.745832	-5.96204	-5.90717	-5.78484	>tr|A0A5F9C343|A0A5F9C343_RABIT Periostin OS=Oryctolagus cuniculus OX=9986 GN=POSTN PE=4 SV=1
1	K.IYLKGVN[+2569.905]DTLLVNELK.S-NeuAc(2)Hex(6)HexNAc(5)	-5.90802	-0.745832	-5.67598	-6.35868	-5.5945	>tr|A0A5F9C343|A0A5F9C343_RABIT Periostin OS=Oryctolagus cuniculus OX=9986 GN=POSTN PE=4 SV=1
1	K.IYSGVDFGGEELN[+1913.677]VTFVK.G-NeuAc(1)Hex(5)HexNAc(4)	-6.27729	-0.745832	-6.00996	-5.88397	-5.84341	>tr|G1T127|G1T127_RABIT Kallikrein B1 OS=Oryctolagus cuniculus OX=9986 GN=KLKB1 PE=4 SV=2
1	K.KDTIIKPLLVEPEGLEKEETFNSLLC[+57.021]PSGGELSYQLFLELPLNVVN[+2076.750]ESAR.A-Fuc(2)Hex(6)HexNAc(4)	-5.74043	-0.784926	-5.72742	-6.35057	-5.53947	>tr|G1SQ70|G1SQ70_RABIT Alpha-2-macroglobulin OS=Oryctolagus cuniculus OX=9986 GN=A2M PE=3 SV=3
1	K.KDTIIKPLLVEPEGLEKEETFNSLLC[+57.021]PSGGELSYQLFLELPLNVVN[+2206.813]ESAR.A-Fuc(4)Hex(5)HexNAc(4)	-5.4313	0.215612243450288	-6.11625	-6.11029	-6.38351	>tr|G1SQ70|G1SQ70_RABIT Alpha-2-macroglobulin OS=Oryctolagus cuniculus OX=9986 GN=A2M PE=3 SV=3
1	K.KLHINHNN[+2133.772]LTESVGPLPK.S-Fuc(1)Hex(6)HexNAc(5)	-5.80424	-0.745832	-6.1889	-5.22797	-5.81668	>tr|G1SP97|G1SP97_RABIT Lumican OS=Oryctolagus cuniculus OX=9986 GN=LUM PE=3 SV=1
1	K.KVFVHTPTTN[+1548.545]YTLQDYRR.F-NeuAc(1)Hex(4)HexNAc(3)	-6.23387	-0.745832	-5.53918	-5.72215	-6.55551	>tr|G1SVB3|G1SVB3_RABIT Phospholipase A2 group XV OS=Oryctolagus cuniculus OX=9986 GN=PLA2G15 PE=3 SV=1
1	K.LASTHSELN[+1663.608]ITQGEWASK.R-Hex(4)HexNAc(5)	-6.60999	-0.599015	-6.96242	-6.11704	-6.38498	>tr|G1SK63|G1SK63_RABIT Uncharacterized protein OS=Oryctolagus cuniculus OX=9986 PE=4 SV=3
1	K.LASTHSELN[+1954.704]ITQGEWASK.R-NeuAc(1)Hex(4)HexNAc(5)	-6.45954	-0.784926	-6.18398	-5.77983	-5.89857	>tr|G1SK63|G1SK63_RABIT Uncharacterized protein OS=Oryctolagus cuniculus OX=9986 PE=4 SV=3
1	K.LC[+57.021]PDC[+57.021]PLLTPLN[+1710.598]DTR.V-NeuAc(1)Hex(5)HexNAc(3)	-6.05946	-0.745832	-6.27184	-6.03217	-5.91218	>tr|U3KMR2|U3KMR2_RABIT Alpha-2-HS-glycoprotein OS=Oryctolagus cuniculus OX=9986 GN=AHSG PE=4 SV=1
1	K.LC[+57.021]PDC[+57.021]PLLTPLN[+1751.624]DTR.V-NeuAc(1)Hex(4)HexNAc(4)	-5.7324	0.196143475982252	-6.15421	-6.20418	-6.15999	>tr|U3KMR2|U3KMR2_RABIT Alpha-2-HS-glycoprotein OS=Oryctolagus cuniculus OX=9986 GN=AHSG PE=4 SV=1
1	K.LC[+57.021]PDC[+57.021]PLLTPLN[+1914.697]DTR.V-Fuc(2)Hex(5)HexNAc(4)	-6.00771	-0.209757	-5.95589	-5.85213	-5.71972	>tr|U3KMR2|U3KMR2_RABIT Alpha-2-HS-glycoprotein OS=Oryctolagus cuniculus OX=9986 GN=AHSG PE=4 SV=1
1	K.LC[+57.021]PDC[+57.021]PLLTPLN[+2247.840]DTR.V-Fuc(4)Hex(4)HexNAc(5)	-5.80609	-0.435018	-5.95096	-5.61545	-6.1076	>tr|U3KMR2|U3KMR2_RABIT Alpha-2-HS-glycoprotein OS=Oryctolagus cuniculus OX=9986 GN=AHSG PE=4 SV=1
1	K.LC[+57.021]PDC[+57.021]PLLTPLN[+2278.809]DTR.V-NeuAc(1)Hex(6)HexNAc(5)	-6.13015	0.0313484800569794	-6.16287	-6.40923	-5.88478	>tr|U3KMR2|U3KMR2_RABIT Alpha-2-HS-glycoprotein OS=Oryctolagus cuniculus OX=9986 GN=AHSG PE=4 SV=1
1	K.LC[+57.021]PDC[+57.021]PLLTPLN[+2861.000]DTR.V-NeuAc(3)Hex(6)HexNAc(5)	1.37514659321211	2.31810478440496	1.50481387273854	0.569051587244511	1.18594144405016	>tr|U3KMR2|U3KMR2_RABIT Alpha-2-HS-glycoprotein OS=Oryctolagus cuniculus OX=9986 GN=AHSG PE=4 SV=1
1	K.LGAC[+57.021]N[+1622.582]DTLK.Q-Hex(5)HexNAc(4)	-6.00548	-0.745832	-5.668	-5.69358	-5.9661	>tr|G1SIK0|G1SIK0_RABIT Antithrombin-III OS=Oryctolagus cuniculus OX=9986 GN=SERPINC1 PE=3 SV=1
1	K.LGAC[+57.021]N[+1913.677]DTLK.Q-NeuAc(1)Hex(5)HexNAc(4)	0.405348580252275	0.727278783294405	0.471360960255299	0.481386009463258	0.458742197523151	>tr|G1SIK0|G1SIK0_RABIT Antithrombin-III OS=Oryctolagus cuniculus OX=9986 GN=SERPINC1 PE=3 SV=1
1	K.LGN[+2569.905]WSAQPSC[+57.021]K.A-NeuAc(2)Hex(6)HexNAc(5)	0.906269661148562	1.01949654472558	-0.866483	-0.0150889	0.213946091921996	>tr|G1SJM1|G1SJM1_RABIT Apolipoprotein H OS=Oryctolagus cuniculus OX=9986 GN=CEP112 PE=4 SV=2
1	K.LGTALSSGHVLIN[+1913.677]ETLTQVLLVGAPTHDDVSK.M-NeuAc(1)Hex(5)HexNAc(4)	-5.71149	0.510074930441187	-5.82312	-6.20831	-5.65564	>tr|G1SD43|G1SD43_RABIT Glycosyl-phosphatidylinositol-specific phospholipase D OS=Oryctolagus cuniculus OX=9986 GN=GPLD1 PE=3 SV=3
1	K.LHINHNN[+2101.782]LTESVGPLPK.S-Fuc(3)Hex(4)HexNAc(5)	-6.62936	-0.435018	-5.93508	-5.7204	-6.61133	>tr|G1SP97|G1SP97_RABIT Lumican OS=Oryctolagus cuniculus OX=9986 GN=LUM PE=3 SV=1
1	K.LHINHNN[+2498.904]LTESVGPLPK.S-Fuc(1)Hex(7)HexNAc(6)	-5.62628	-0.745832	-6.39395	-6.24807	-5.81596	>tr|G1SP97|G1SP97_RABIT Lumican OS=Oryctolagus cuniculus OX=9986 GN=LUM PE=3 SV=1
1	K.LHINHNN[+2644.962]LTESVGPLPK.S-Fuc(2)Hex(7)HexNAc(6)	-5.99853	0.0313484800569794	-6.27216	-6.04738	-5.99365	>tr|G1SP97|G1SP97_RABIT Lumican OS=Oryctolagus cuniculus OX=9986 GN=LUM PE=3 SV=1
1	K.LHINHNN[+2715.963]LTESVGPLPK.S-NeuAc(2)Fuc(1)Hex(6)HexNAc(5)	1.22545451879339	1.56775113058255	1.02174932906422	1.08860902381085	1.2947811819557	>tr|G1SP97|G1SP97_RABIT Lumican OS=Oryctolagus cuniculus OX=9986 GN=LUM PE=3 SV=1
1	K.LLHALGGDDFVGSLN[+1913.677]R.T-NeuAc(1)Hex(5)HexNAc(4)	-5.86773	-0.435018	-5.68218	-6.24634	-6.10554	>tr|G1T0U8|G1T0U8_RABIT Prenylcysteine oxidase 1 OS=Oryctolagus cuniculus OX=9986 GN=PCYOX1 PE=3 SV=2
1	K.LLLSEVDSHPQTSSSYPTAVN[+2569.905]WSAYAMAIR.P-NeuAc(2)Hex(6)HexNAc(5)	-5.5947	-0.745832	-6.80859	-6.44811	-6.11316	>tr|A0A5F9CAG9|A0A5F9CAG9_RABIT Uncharacterized protein OS=Oryctolagus cuniculus OX=9986 PE=3 SV=1
1	K.LN[+2262.814]GSFPGPLQPIVFQEALYNHR.G-NeuAc(1)Fuc(1)Hex(5)HexNAc(5)	-5.29483	-0.784926	-6.18257	-5.5315	-6.56484	>tr|G1U575|G1U575_RABIT C1q domain-containing protein OS=Oryctolagus cuniculus OX=9986 PE=4 SV=2
1	K.LNAENN[+2206.813]ETFFFK.I-Fuc(4)Hex(5)HexNAc(4)	-6.3131	-0.765241	-6.43075	-6.01387	-5.32082	>tr|A0A5F9CHF0|A0A5F9CHF0_RABIT Kininogen 1 OS=Oryctolagus cuniculus OX=9986 GN=KNG1 PE=4 SV=1
1	K.LQGPVAVYTWEGNQVN[+2569.905]ITC[+57.021]EVFAYPSATISWFR.D-NeuAc(2)Hex(6)HexNAc(5)	-5.90773	-0.784926	-6.39296	-6.51353	-6.21411	>tr|G1SQI4|G1SQI4_RABIT Neural cell adhesion molecule 1 OS=Oryctolagus cuniculus OX=9986 GN=NCAM1 PE=4 SV=3
1	K.LQQLFN[+2715.963]HTMFILEQEEYQREGIEWNFIDFGLDLQPC[+57.021]IELIER.P-NeuAc(2)Fuc(1)Hex(6)HexNAc(5)	-6.33207	-0.784926	-6.18494	-5.94187	-5.98882	>tr|G1U469|G1U469_RABIT Myosin-11 OS=Oryctolagus cuniculus OX=9986 GN=MYH11 PE=3 SV=2
1	K.LSFVKVDAYFRPGLSFFGQVLLVDGKGIPMPN[+2206.813]K.T-Fuc(4)Hex(5)HexNAc(4)	-5.97681	-0.745832	-5.56738	-5.91105	-6.18262	>tr|G1SQ70|G1SQ70_RABIT Alpha-2-macroglobulin OS=Oryctolagus cuniculus OX=9986 GN=A2M PE=3 SV=3
1	K.LSPEDLLLRWANYHLENAGC[+57.021]NKISN[+2756.989]FSTDIK.L-NeuAc(2)Fuc(1)Hex(5)HexNAc(6)	-5.99661	-0.784926	-6.18426	-6.17963	-5.83539	>tr|G1TET2|G1TET2_RABIT Lymphocyte cytosolic protein 1 OS=Oryctolagus cuniculus OX=9986 GN=LCP1 PE=4 SV=2
1	K.LSTSPFALN[+2204.772]LSILPNVK.F-NeuAc(2)Hex(5)HexNAc(4)	-5.70252	-0.784926	-6.16947	-5.95669	-6.36822	>tr|G1U9R4|G1U9R4_RABIT Apolipoprotein B OS=Oryctolagus cuniculus OX=9986 GN=APOB PE=4 SV=2
1	K.LSVVKAQYVEKEN[+1663.608]LTVR.C-Hex(4)HexNAc(5)	-6.41181	-0.745832	-6.39434	-6.16422	-6.15725	>tr|A0A5F9CJA1|A0A5F9CJA1_RABIT Uncharacterized protein OS=Oryctolagus cuniculus OX=9986 PE=4 SV=1
1	K.LYASETQFQAVLGN[+2204.772]FTHLVQVC[+57.021]C[+57.021]R.T-NeuAc(2)Hex(5)HexNAc(4)	-6.12671	-0.784926	-6.48663	-6.21068	-5.89047	>tr|G1TZC1|G1TZC1_RABIT Uncharacterized protein OS=Oryctolagus cuniculus OX=9986 PE=4 SV=2
1	K.MDYNSFQAVTSN[+876.322]ETK.F-Fuc(1)Hex(2)HexNAc(2)	-5.88776	-0.784926	-6.19416	-5.85723	-5.52803	>tr|U3KMR1|U3KMR1_RABIT Adhesion G protein-coupled receptor F5 OS=Oryctolagus cuniculus OX=9986 GN=ADGRF5 PE=3 SV=1
1	K.MLNTSSLLDQLNEQFNWVSQLAN[+4028.418]LTQGPDQYYLR.V-NeuAc(4)Fuc(1)Hex(8)HexNAc(7)	-6.1098	-0.784926	-6.2362	-6.06778	-5.96909	>tr|G1SQ27|G1SQ27_RABIT Clusterin OS=Oryctolagus cuniculus OX=9986 GN=CLU PE=3 SV=2
1	K.MYKPSTGN[+1913.677]NSLFQDTAVFEC[+57.021]LPR.Y-NeuAc(1)Hex(5)HexNAc(4)	1.24172866941573	1.4507783007995	-0.579538	0.313206667975792	0.632948429681647	>tr|G1SJM1|G1SJM1_RABIT Apolipoprotein H OS=Oryctolagus cuniculus OX=9986 GN=CEP112 PE=4 SV=2
1	K.MYKPSTGN[+2263.835]NSLFQDTAVFEC[+57.021]LPR.Y-Fuc(3)Hex(5)HexNAc(5)	-6.26545	-0.435018	-6.53454	-5.89522	-5.74204	>tr|G1SJM1|G1SJM1_RABIT Apolipoprotein H OS=Oryctolagus cuniculus OX=9986 GN=CEP112 PE=4 SV=2
1	K.N[+1257.449]SSLC[+57.021]ELC[+57.021]IGPSVC[+57.021]APNNR.E-Hex(4)HexNAc(3)	-5.64923	-0.745832	-5.79663	-6.26047	-5.42125	>tr|G1STF7|G1STF7_RABIT Beta-1 metal-binding globulin OS=Oryctolagus cuniculus OX=9986 PE=3 SV=1
1	K.N[+1403.507]SSLC[+57.021]ELC[+57.021]VGPSVC[+57.021]APNNR.E-Fuc(1)Hex(4)HexNAc(3)	-5.50739	-0.765241	-6.14054	-5.55575	-5.57523	>sp|P19134|TRFE_RABIT Serotransferrin OS=Oryctolagus cuniculus OX=9986 GN=TF PE=1 SV=4
1	K.N[+1540.529]NTR.G-Hex(7)HexNAc(2)	-6.12553	-0.435018	-5.87299	-5.99164	-6.48472	>tr|A0A5F9DC52|A0A5F9DC52_RABIT Tenascin C OS=Oryctolagus cuniculus OX=9986 GN=TNC PE=3 SV=1
1	K.N[+1710.598]GSLFAFR.G-NeuAc(1)Hex(5)HexNAc(3)	0.443085155640002	1.0158729006082	0.285488893648089	0.569051587244511	-0.700839	>tr|G1U415|G1U415_RABIT Vitronectin OS=Oryctolagus cuniculus OX=9986 GN=VTN PE=4 SV=1
1	K.N[+1710.598]MSK.S-NeuAc(1)Hex(5)HexNAc(3)	-5.85091	-0.784926	-5.9632	-6.13857	-6.38616	>tr|Q9TTJ4|Q9TTJ4_RABIT Inter-alpha-trypsin inhibitor heavy chain H1 OS=Oryctolagus cuniculus OX=9986 GN=ITI HC1 PE=2 SV=1
1	K.N[+1710.598]VTK.D-NeuAc(1)Hex(5)HexNAc(3)	-6.1185	-0.765241	-5.55231	-6.18751	-6.61354	>tr|G1U128|G1U128_RABIT Mannan binding lectin serine peptidase 1 OS=Oryctolagus cuniculus OX=9986 GN=MASP1 PE=4 SV=3
1	K.N[+1711.618]SSLC[+57.021]ELC[+57.021]IGPSVC[+57.021]APNNR.E-Fuc(2)Hex(5)HexNAc(3)	-5.53505	-0.435018	-5.76522	-5.82822	-5.51614	>tr|G1STF7|G1STF7_RABIT Beta-1 metal-binding globulin OS=Oryctolagus cuniculus OX=9986 PE=3 SV=1
1	K.N[+1850.693]HTAVLEK.H-Fuc(1)Hex(3)HexNAc(6)	-5.78963	-0.581775	-6.12082	-5.55381	-6.16515	>tr|G1TZA1|G1TZA1_RABIT C1q domain-containing protein OS=Oryctolagus cuniculus OX=9986 PE=4 SV=2
1	K.N[+1850.693]QTR.E-Fuc(1)Hex(3)HexNAc(6)	-6.17624	-0.435018	-5.97735	-6.30496	-6.37258	>tr|U3KPG6|U3KPG6_RABIT Intercellular adhesion molecule 1 OS=Oryctolagus cuniculus OX=9986 GN=ICAM1 PE=3 SV=1
1	K.N[+1913.677]GSLFAFR.G-NeuAc(1)Hex(5)HexNAc(4)	0.69242502889921	1.82312168634573	0.84471840649764	0.867874691712568	0.642070417303167	>tr|G1U415|G1U415_RABIT Vitronectin OS=Oryctolagus cuniculus OX=9986 GN=VTN PE=4 SV=1
1	K.N[+2059.735]ESFQC[+57.021]VNGK.N-NeuAc(1)Fuc(1)Hex(5)HexNAc(4)	-5.85931	-0.745832	-6.24017	-5.88457	-5.89193	>tr|A0A5F9CAP0|A0A5F9CAP0_RABIT Uncharacterized protein OS=Oryctolagus cuniculus OX=9986 PE=4 SV=1
1	K.N[+2101.782]SSLC[+57.021]ELC[+57.021]VGPSVC[+57.021]APNNR.E-Fuc(3)Hex(4)HexNAc(5)	-6.24485	-0.435018	-6.26003	-5.94609	-6.1721	>sp|P19134|TRFE_RABIT Serotransferrin OS=Oryctolagus cuniculus OX=9986 GN=TF PE=1 SV=4
1	K.N[+2116.756]SSLC[+57.021]ELC[+57.021]IGPSVC[+57.021]APNNR.E-NeuAc(1)Hex(5)HexNAc(5)	-6.22893	-0.581775	-6.31506	-5.97261	-6.04141	>tr|G1STF7|G1STF7_RABIT Beta-1 metal-binding globulin OS=Oryctolagus cuniculus OX=9986 PE=3 SV=1
1	K.N[+2133.772]C[+57.021]TR.S-Fuc(1)Hex(6)HexNAc(5)	-5.84151	-0.745832	-6.65	-0.835796	-5.699	>tr|G1SEL1|G1SEL1_RABIT Complement factor H related 5 OS=Oryctolagus cuniculus OX=9986 GN=CFHR5 PE=4 SV=2
1	K.N[+2142.808]SSLC[+57.021]ELC[+57.021]IGPSVC[+57.021]APNNR.E-Fuc(3)Hex(3)HexNAc(6)	-6.06702	-0.745832	-6.11045	-6.19212	-5.92572	>tr|G1STF7|G1STF7_RABIT Beta-1 metal-binding globulin OS=Oryctolagus cuniculus OX=9986 PE=3 SV=1
1	K.N[+2204.772]ESFQC[+57.021]VNGK.N-NeuAc(2)Hex(5)HexNAc(4)	0.66139798864893	1.05180763124793	0.475003680698493	0.921125906410285	0.472630245600012	>tr|A0A5F9CAP0|A0A5F9CAP0_RABIT Uncharacterized protein OS=Oryctolagus cuniculus OX=9986 PE=4 SV=1
1	K.N[+2204.772]ITNDWTR.R-NeuAc(2)Hex(5)HexNAc(4)	-6.5377	-0.784926	-5.62104	-6.04743	-5.95452	>sp|P15541|AMPN_RABIT Aminopeptidase N OS=Oryctolagus cuniculus OX=9986 GN=ANPEP PE=1 SV=4
1	K.N[+2204.772]MSLELNSK.L-NeuAc(2)Hex(5)HexNAc(4)	-6.0744	-0.209757	-5.61282	-6.13303	-6.23867	>tr|G1SEB2|G1SEB2_RABIT Angiopoietin like 3 OS=Oryctolagus cuniculus OX=9986 GN=ANGPTL3 PE=4 SV=1
1	K.N[+2204.772]NSIWYK.L-NeuAc(2)Hex(5)HexNAc(4)	0.147260225748679	0.87903555764311	0.198759506556206	0.140106577123511	0.469100170444643	>tr|A0A5F9CG95|A0A5F9CG95_RABIT Uncharacterized protein OS=Oryctolagus cuniculus OX=9986 PE=4 SV=1
1	K.N[+2206.813]SSLC[+57.021]ELC[+57.021]VGPSVC[+57.021]APNNR.E-Fuc(4)Hex(5)HexNAc(4)	-6.53608	-0.784926	-5.93724	-6.5149	-6.26631	>sp|P19134|TRFE_RABIT Serotransferrin OS=Oryctolagus cuniculus OX=9986 GN=TF PE=1 SV=4
1	K.N[+2245.799]SSLC[+57.021]ELC[+57.021]IGPSVC[+57.021]APNNR.E-NeuAc(2)Hex(4)HexNAc(5)	1.46287911434651	1.86964700541019	1.20119250704801	1.53912703729245	1.19619158929734	>tr|G1STF7|G1STF7_RABIT Beta-1 metal-binding globulin OS=Oryctolagus cuniculus OX=9986 PE=3 SV=1
1	K.N[+2263.835]QTR.E-Fuc(3)Hex(5)HexNAc(5)	-6.21936	-0.435018	-5.20976	-6.08426	-5.96572	>tr|U3KPG6|U3KPG6_RABIT Intercellular adhesion molecule 1 OS=Oryctolagus cuniculus OX=9986 GN=ICAM1 PE=3 SV=1
1	K.N[+2279.830]SSLC[+57.021]ELC[+57.021]VGPSVC[+57.021]APNNR.E-Fuc(2)Hex(6)HexNAc(5)	-6.10215	-0.784926	-5.66531	-6.00855	-6.23844	>sp|P19134|TRFE_RABIT Serotransferrin OS=Oryctolagus cuniculus OX=9986 GN=TF PE=1 SV=4
1	K.N[+2350.830]HSIR.P-NeuAc(2)Fuc(1)Hex(5)HexNAc(4)	-6.19771	-0.435018	-5.68906	-5.84323	-5.81817	>tr|A0A4Z2CUB8|A0A4Z2CUB8_SCHJA Membrane-associated guanylate kinase, WW and PDZ domain-containing protein isoform 2 OS=Schistosoma japonicum OX=6182 GN=EWB00_007472 PE=4 SV=1
1	K.N[+2350.830]ITNDWTR.R-NeuAc(2)Fuc(1)Hex(5)HexNAc(4)	-6.01092	-0.784926	-5.85268	-6.26598	-6.31874	>sp|P15541|AMPN_RABIT Aminopeptidase N OS=Oryctolagus cuniculus OX=9986 GN=ANPEP PE=1 SV=4
1	K.N[+2553.910]HSIR.P-NeuAc(2)Fuc(1)Hex(5)HexNAc(5)	-5.78855	0.176398772369551	-6.29317	-5.5275	-5.72676	>tr|A0A4Z2CUB8|A0A4Z2CUB8_SCHJA Membrane-associated guanylate kinase, WW and PDZ domain-containing protein isoform 2 OS=Schistosoma japonicum OX=6182 GN=EWB00_007472 PE=4 SV=1
1	K.N[+2569.905]ESFQC[+57.021]VNGK.N-NeuAc(2)Hex(6)HexNAc(5)	-6.53146	-0.745832	-6.45603	-6.31986	-5.98955	>tr|A0A5F9CAP0|A0A5F9CAP0_RABIT Uncharacterized protein OS=Oryctolagus cuniculus OX=9986 PE=4 SV=1
1	K.N[+2569.905]HSIR.P-NeuAc(2)Hex(6)HexNAc(5)	-6.40164	-0.784926	-6.202	-5.84547	-6.12674	>tr|A0A4Z2CUB8|A0A4Z2CUB8_SCHJA Membrane-associated guanylate kinase, WW and PDZ domain-containing protein isoform 2 OS=Schistosoma japonicum OX=6182 GN=EWB00_007472 PE=4 SV=1
1	K.N[+2569.905]STVMAR.A-NeuAc(2)Hex(6)HexNAc(5)	-6.34731	-0.745832	-6.89169	-5.90712	-5.65792	>tr|A0A5F9D8X7|A0A5F9D8X7_RABIT Fibroblast activation protein alpha OS=Oryctolagus cuniculus OX=9986 GN=FAP PE=4 SV=1
1	K.N[+2715.963]HSIR.P-NeuAc(2)Fuc(1)Hex(6)HexNAc(5)	-6.43001	0.527265140466286	-6.03093	-5.81295	-5.925	>tr|A0A4Z2CUB8|A0A4Z2CUB8_SCHJA Membrane-associated guanylate kinase, WW and PDZ domain-containing protein isoform 2 OS=Schistosoma japonicum OX=6182 GN=EWB00_007472 PE=4 SV=1
1	K.N[+2861.000]HSIR.P-NeuAc(3)Hex(6)HexNAc(5)	-6.22677	-0.784926	-5.92143	-6.3993	-6.21528	>tr|A0A4Z2CUB8|A0A4Z2CUB8_SCHJA Membrane-associated guanylate kinase, WW and PDZ domain-containing protein isoform 2 OS=Schistosoma japonicum OX=6182 GN=EWB00_007472 PE=4 SV=1
1	K.N[+2861.000]KSSGTQSVLK.G-NeuAc(3)Hex(6)HexNAc(5)	-5.8259	-0.435018	-5.75072	-6.42871	-6.36024	>tr|A0A5F9CIL7|A0A5F9CIL7_RABIT Senataxin OS=Oryctolagus cuniculus OX=9986 GN=SETX PE=4 SV=1
1	K.N[+3007.058]FTVNDILVR.I-NeuAc(3)Fuc(1)Hex(6)HexNAc(5)	-6.027	-0.599015	-5.82036	-6.12517	-6.35505	>tr|Q28731|Q28731_RABIT Thrombin (Fragment) OS=Oryctolagus cuniculus OX=9986 GN=thrombin PE=2 SV=1
1	K.N[+3007.058]ITNDWTR.R-NeuAc(3)Fuc(1)Hex(6)HexNAc(5)	-6.33704	-0.784926	-5.85089	-5.84677	-5.85183	>sp|P15541|AMPN_RABIT Aminopeptidase N OS=Oryctolagus cuniculus OX=9986 GN=ANPEP PE=1 SV=4
1	K.N[+3372.190]KSLR.T-NeuAc(3)Fuc(1)Hex(7)HexNAc(6)	-6.36725	-0.745832	-6.26851	-6.15397	-5.94868	>tr|A0A5F9C115|A0A5F9C115_RABIT Ring finger protein 8 OS=Oryctolagus cuniculus OX=9986 GN=RNF8 PE=4 SV=1
1	K.N[+4028.418]ASSNR.F-NeuAc(4)Fuc(1)Hex(8)HexNAc(7)	-6.10643	-0.435018	-6.04638	-5.85529	-6.09185	>tr|A0A4Z2CP65|A0A4Z2CP65_SCHJA Uncharacterized protein OS=Schistosoma japonicum OX=6182 GN=EWB00_008685 PE=4 SV=1
1	K.N[+4028.418]ESFQC[+57.021]VNGK.N-NeuAc(4)Fuc(1)Hex(8)HexNAc(7)	-5.71911	-0.784926	-6.42184	-5.94877	-5.97834	>tr|A0A5F9CAP0|A0A5F9CAP0_RABIT Uncharacterized protein OS=Oryctolagus cuniculus OX=9986 PE=4 SV=1
1	K.N[+730.264]SSLC[+57.021]ELC[+57.021]VGPSVC[+57.021]APNNREGYYGYTGAFR.C-Hex(2)HexNAc(2)	-5.85134	-0.745832	-6.06331	-6.37908	-5.64113	>sp|P19134|TRFE_RABIT Serotransferrin OS=Oryctolagus cuniculus OX=9986 GN=TF PE=1 SV=4
1	K.N[+876.322]C[+57.021]TR.S-Fuc(1)Hex(2)HexNAc(2)	-6.40061	-0.745832	-5.5324	-6.47017	-5.75733	>tr|G1SEL1|G1SEL1_RABIT Complement factor H related 5 OS=Oryctolagus cuniculus OX=9986 GN=CFHR5 PE=4 SV=2
1	K.N[+892.317]TTC[+57.021]R.D-Hex(3)HexNAc(2)	-5.79276	-0.745832	-5.93454	-5.69059	-6.26011	>tr|G1SS91|G1SS91_RABIT C4a anaphylatoxin OS=Oryctolagus cuniculus OX=9986 PE=4 SV=2
1	K.NAC[+57.021]WLNWDDTKALLAFVIPALIIVVIN[+1768.640]VTITVVVITK.I-Fuc(1)Hex(5)HexNAc(4)	-6.40374	-0.784926	-5.87815	-6.49303	-5.89961	>tr|U3KMR1|U3KMR1_RABIT Adhesion G protein-coupled receptor F5 OS=Oryctolagus cuniculus OX=9986 GN=ADGRF5 PE=3 SV=1
1	K.NEEVKN[+2204.772]MSLELNSK.L-NeuAc(2)Hex(5)HexNAc(4)	-6.24353	0.215612243450288	-6.07746	-6.15208	-6.30083	>tr|G1SEB2|G1SEB2_RABIT Angiopoietin like 3 OS=Oryctolagus cuniculus OX=9986 GN=ANGPTL3 PE=4 SV=1
1	K.NEYNHNSN[+2204.772]VSYR.C-NeuAc(2)Hex(5)HexNAc(4)	-0.167891	0.0157761487075127	-0.668729	-0.657968	-0.70885	>tr|A0A5F9CG95|A0A5F9CG95_RABIT Uncharacterized protein OS=Oryctolagus cuniculus OX=9986 PE=4 SV=1
1	K.NIDQEFVVMFSVVDEN[+4028.418]LSWYLGDNIKTYC[+57.021]SDPEGVDEDDEDFQESNR.M-NeuAc(4)Fuc(1)Hex(8)HexNAc(7)	-5.79981	-0.745832	-6.14326	-6.75426	-5.94226	>tr|G1SJX3|G1SJX3_RABIT Ceruloplasmin OS=Oryctolagus cuniculus OX=9986 GN=CP PE=3 SV=1
1	K.NIENC[+57.021]YIPWC[+57.021]DHHLC[+57.021]HNN[+1519.555]GTC[+57.021]ISDGENWFC[+57.021]EC[+57.021]PR.L-Fuc(2)Pent(1)Hex(3)HexNAc(3)	-6.38723	-0.435018	-6.0489	-5.82244	-6.0709	>tr|G1U0E3|G1U0E3_RABIT Uncharacterized protein OS=Oryctolagus cuniculus OX=9986 PE=4 SV=3
1	K.NIENC[+57.021]YIPWC[+57.021]DHHLC[+57.021]HNN[+2553.910]GTC[+57.021]ISDGENWFC[+57.021]EC[+57.021]PR.L-NeuAc(2)Fuc(1)Hex(5)HexNAc(5)	-5.69821	-0.435018	-6.0567	-6.93574	-6.51125	>tr|G1U0E3|G1U0E3_RABIT Uncharacterized protein OS=Oryctolagus cuniculus OX=9986 PE=4 SV=3
1	K.NKEDALN[+2350.830]ETR.D-NeuAc(2)Fuc(1)Hex(5)HexNAc(4)	-6.1992	-0.435018	-5.94559	-5.59729	-5.9981	>sp|Q9XSC5|CLUS_RABIT Clusterin OS=Oryctolagus cuniculus OX=9986 GN=CLU PE=2 SV=1
1	K.NNLLHPSLVLLLLVLLPAGASASGKPNYMVLVPSLIHTGTPVKGC[+57.021]LLLSQLN[+1768.640]ETVTVTASLEALR.E-Fuc(1)Hex(5)HexNAc(4)	-5.61533	-0.745832	-5.74517	-5.96994	-6.2218	>tr|G1SQ70|G1SQ70_RABIT Alpha-2-macroglobulin OS=Oryctolagus cuniculus OX=9986 GN=A2M PE=3 SV=3
1	K.NYTN[+2204.772]YSANVLEEVNR.C-NeuAc(2)Hex(5)HexNAc(4)	-5.95784	-0.435018	-5.68269	-6.13475	-5.80274	>tr|Q5DC10|Q5DC10_SCHJA SJCHGC00993 protein OS=Schistosoma japonicum OX=6182 PE=2 SV=1
1	K.PELPDEELQSLFTN[+1460.529]FTDTLEK.C-Hex(4)HexNAc(4)	-5.57495	-0.784926	-5.70252	-5.86556	-6.30515	>tr|A0A5F9DE89|A0A5F9DE89_RABIT Afamin OS=Oryctolagus cuniculus OX=9986 GN=AFM PE=4 SV=1
1	K.PIPN[+2245.799]K.T-NeuAc(2)Hex(4)HexNAc(5)	-0.778432	0.517877970944257	-0.28996	-0.755305	-0.684957	>tr|A0A5F9C1C5|A0A5F9C1C5_RABIT Uncharacterized protein OS=Oryctolagus cuniculus OX=9986 PE=3 SV=1
1	K.PLLVEPEGLEKEETFNSLLC[+57.021]PSGGELSYQLFLELPLNVVN[+2204.772]ESAR.A-NeuAc(2)Hex(5)HexNAc(4)	-6.40058	-0.745832	-6.48478	-5.37541	-5.88826	>tr|G1SQ70|G1SQ70_RABIT Alpha-2-macroglobulin OS=Oryctolagus cuniculus OX=9986 GN=A2M PE=3 SV=3
1	K.PLPTMPASHMN[+2204.772]GSSSPR.C-NeuAc(2)Hex(5)HexNAc(4)	-5.88056	-0.784926	-6.25843	-6.18979	-6.09227	>tr|G1U469|G1U469_RABIT Myosin-11 OS=Oryctolagus cuniculus OX=9986 GN=MYH11 PE=3 SV=2
1	K.PSTGN[+2644.962]NSLFQDTAVFEC[+57.021]LPR.Y-Fuc(2)Hex(7)HexNAc(6)	0.509014489707279	1.17914701737632	-0.28996	0.221622246184235	-0.660497	>tr|G1SJM1|G1SJM1_RABIT Apolipoprotein H OS=Oryctolagus cuniculus OX=9986 GN=CEP112 PE=4 SV=2
1	K.PTLSQQQQAAGQPDTALN[+1694.603]GSFIIR.Y-NeuAc(1)Fuc(1)Hex(4)HexNAc(3)	-5.75304	-0.435018	-6.20576	-5.77018	-5.95874	>tr|G1TY29|G1TY29_RABIT Uncharacterized protein OS=Oryctolagus cuniculus OX=9986 GN=ITIH4 PE=4 SV=2
1	K.PTLSQQQQAAGQPDTALN[+2206.813]GSFIIR.Y-Fuc(4)Hex(5)HexNAc(4)	-6.06627	-0.784926	-6.16583	-5.9317	-5.72559	>tr|G1TY29|G1TY29_RABIT Uncharacterized protein OS=Oryctolagus cuniculus OX=9986 GN=ITIH4 PE=4 SV=2
1	K.PVDPDPWKSDKQFN[+2569.905]ATVIIR.S-NeuAc(2)Hex(6)HexNAc(5)	-6.17989	-0.435018	-5.79954	-6.3313	-5.91161	>tr|G1SK63|G1SK63_RABIT Uncharacterized protein OS=Oryctolagus cuniculus OX=9986 PE=4 SV=3
1	K.PVPGHVTIC[+57.021]IC[+57.021]PHGSHFLNRDQSTINLPC[+57.021]KEVSQQVSEN[+2059.735]YSEIYSQGC[+57.021]LTQQVNTSMFQLK.D-NeuAc(1)Fuc(1)Hex(5)HexNAc(4)	-6.05338	-0.784926	-5.69846	-6.29279	-5.73576	>tr|G1TR31|G1TR31_RABIT Uncharacterized protein OS=Oryctolagus cuniculus OX=9986 PE=3 SV=3
1	K.PYSIPPC[+57.021]EHHVN[+1257.449]GSR.P-Hex(4)HexNAc(3)	-6.12779	-0.784926	-6.04266	-5.74158	-5.38083	>tr|A0A5F9CQV5|A0A5F9CQV5_RABIT Cathepsin B OS=Oryctolagus cuniculus OX=9986 GN=CTSB PE=3 SV=1
1	K.QFN[+1257.449]ATVIIR.S-Hex(4)HexNAc(3)	-5.7817	-0.765241	-6.00657	-5.46366	-6.43309	>tr|G1SK63|G1SK63_RABIT Uncharacterized protein OS=Oryctolagus cuniculus OX=9986 PE=4 SV=3
1	K.QFN[+1460.529]ATVIIR.S-Hex(4)HexNAc(4)	-6.51799	-0.765241	-6.27399	-5.87117	-6.0813	>tr|G1SK63|G1SK63_RABIT Uncharacterized protein OS=Oryctolagus cuniculus OX=9986 PE=4 SV=3
1	K.QFN[+1897.682]ATVIIR.S-NeuAc(1)Fuc(1)Hex(4)HexNAc(4)	-5.89398	-0.784926	-6.34039	-5.82267	-5.11339	>tr|G1SK63|G1SK63_RABIT Uncharacterized protein OS=Oryctolagus cuniculus OX=9986 PE=4 SV=3
1	K.QFN[+730.264]ATVIIR.S-Hex(2)HexNAc(2)	-5.78196	-0.435018	-5.77063	-6.09968	-6.20455	>tr|G1SK63|G1SK63_RABIT Uncharacterized protein OS=Oryctolagus cuniculus OX=9986 PE=4 SV=3
1	K.QLEKQLNEFNYN[+2424.867]LTINK.R-NeuAc(1)Fuc(1)Hex(6)HexNAc(5)	-5.76096	-0.435018	-5.82879	-5.60187	-6.24141	>tr|A0A4Z2DIC3|A0A4Z2DIC3_SCHJA Phosphatidylinositol-binding clathrin assembly protein (Fragment) OS=Schistosoma japonicum OX=6182 GN=EWB00_000622 PE=3 SV=1
1	K.QTGNPTKMYEVVYQTGSETHSDFYDIILVATPLNRNMAN[+1548.545]ITFLNFDPPIEEFHQYYQPIVTTLVK.G-NeuAc(1)Hex(4)HexNAc(3)	-6.05222	-0.435018	-5.82286	-5.94437	-5.98152	>tr|G1T0U8|G1T0U8_RABIT Prenylcysteine oxidase 1 OS=Oryctolagus cuniculus OX=9986 GN=PCYOX1 PE=3 SV=2
1	K.SAAC[+57.021]HVEYNSVIN[+714.269]ESLPVPFPDC[+57.021]C[+57.021]PANSC[+57.021]C[+57.021]TC[+57.021]PSSSSRNLISGC[+57.021]QPSLSLQR.P-Fuc(1)Hex(1)HexNAc(2)	-6.62117	-0.784926	-5.58951	-5.73532	-6.27204	>sp|P01879|IGHA_RABIT Ig alpha chain C region (Fragment) OS=Oryctolagus cuniculus OX=9986 PE=2 SV=1
1	K.SAHLHRGFLAVYQAVAVN[+2424.867]SSQPITK.A-NeuAc(1)Fuc(1)Hex(6)HexNAc(5)	-5.08328	-0.435018	-6.37667	-6.16394	-6.25803	>tr|A0A5F9CYP3|A0A5F9CYP3_RABIT Complement C1r OS=Oryctolagus cuniculus OX=9986 GN=C1R PE=4 SV=1
1	K.SC[+57.021]HPAVGTSAGWNIPMGLIYN[+1913.677]QTGSC[+57.021]K.L-NeuAc(1)Hex(5)HexNAc(4)	-6.07841	-0.745832	-6.4153	-5.86957	-5.54121	>tr|G1TKE4|G1TKE4_RABIT Uncharacterized protein OS=Oryctolagus cuniculus OX=9986 PE=3 SV=1
1	K.SFPHIIINDYNHLIIEN[+2756.989]TTTSDSGNYTC[+57.021]VAAC[+57.021]LNGEK.R-NeuAc(2)Fuc(1)Hex(5)HexNAc(6)	-5.95273	-0.784926	-5.49972	-5.55156	-6.12805	>tr|A0A4Z2D1A1|A0A4Z2D1A1_SCHJA Netrin receptor UNC5 OS=Schistosoma japonicum OX=6182 GN=EWB00_005545 PE=3 SV=1
1	K.SIN[+3517.228]TTIR.V-NeuAc(4)Hex(7)HexNAc(6)	-6.30943	-0.435018	-6.54786	-5.89012	-5.48139	>tr|G1U0E3|G1U0E3_RABIT Uncharacterized protein OS=Oryctolagus cuniculus OX=9986 PE=4 SV=3
1	K.SLGAKHSVYDTTN[+860.327]R.T-Fuc(2)Hex(1)HexNAc(2)	-6.1194	-0.784926	-6.02995	-0.835796	-5.97389	>tr|G1T6S4|G1T6S4_RABIT Dystonin OS=Oryctolagus cuniculus OX=9986 GN=DST PE=3 SV=3
1	K.SLGKVN[+1200.428]FTATAEALHPQELC[+57.021]DNEVAEVPALGQK.D-Fuc(1)Hex(4)HexNAc(2)	-6.09337	0.176398772369551	-5.96118	-5.90447	-5.81691	>tr|A0A5F9C1C5|A0A5F9C1C5_RABIT Uncharacterized protein OS=Oryctolagus cuniculus OX=9986 PE=3 SV=1
1	K.SLGSVN[+1622.582]FTVSAEALESQELC[+57.021]ENEVAVVPEHGK.K-Hex(5)HexNAc(4)	-6.23836	-0.784926	-6.49671	-5.68977	-5.91906	>tr|G1SQ70|G1SQ70_RABIT Alpha-2-macroglobulin OS=Oryctolagus cuniculus OX=9986 GN=A2M PE=3 SV=3
1	K.SMGVTELFDKNGN[+1095.397]MSGISDQGITMDLFK.H-Hex(3)HexNAc(3)	-6.11001	-0.784926	-5.40201	-5.44632	-5.61111	>tr|G1SWF0|G1SWF0_RABIT Heparin cofactor 2 OS=Oryctolagus cuniculus OX=9986 GN=SERPIND1 PE=3 SV=1
1	K.SMTN[+1225.460]R.T-Fuc(2)Hex(2)HexNAc(3)	-6.28218	-0.435018	-6.10523	-6.00743	-6.50486	>tr|G1SWF0|G1SWF0_RABIT Heparin cofactor 2 OS=Oryctolagus cuniculus OX=9986 GN=SERPIND1 PE=3 SV=1
1	K.SMTN[+2142.808]R.T-Fuc(3)Hex(3)HexNAc(6)	-5.80959	-0.784926	-5.87969	-5.81424	-6.12534	>tr|G1SWF0|G1SWF0_RABIT Heparin cofactor 2 OS=Oryctolagus cuniculus OX=9986 GN=SERPIND1 PE=3 SV=1
1	K.SN[+1622.582]K.S-Hex(5)HexNAc(4)	-5.66891	-0.745832	-6.18071	-5.94453	-6.38811	>tr|A0A4Z2CSE3|A0A4Z2CSE3_SCHJA Uncharacterized protein OS=Schistosoma japonicum OX=6182 GN=EWB00_007940 PE=4 SV=1
1	K.SPDLEPILSHAVQHFNN[+3517.228]R.T-NeuAc(4)Hex(7)HexNAc(6)	0.69242502889921	1.92341885662969	1.0060177695403	1.32685562663817	1.39379053772302	>tr|A0A5F9CHF0|A0A5F9CHF0_RABIT Kininogen 1 OS=Oryctolagus cuniculus OX=9986 GN=KNG1 PE=4 SV=1
1	K.SYPIVN[+1216.423]VSK.E-Hex(5)HexNAc(2)	-5.9417	-0.784926	-6.43225	-5.79715	-5.83863	>sp|P12337|EST1_RABIT Liver carboxylesterase 1 OS=Oryctolagus cuniculus OX=9986 PE=1 SV=3
1	K.SYPIVN[+1378.476]VSK.E-Hex(6)HexNAc(2)	-5.92067	-0.581775	-5.7715	-6.2513	-5.4007	>sp|P12337|EST1_RABIT Liver carboxylesterase 1 OS=Oryctolagus cuniculus OX=9986 PE=1 SV=3
1	K.TAFITN[+1914.697]FTLTIDGVTYPGHVK.E-Fuc(2)Hex(5)HexNAc(4)	-5.80224	-0.784926	-6.00809	-6.17599	-6.1159	>sp|Q9GLY5|ITIH3_RABIT Inter-alpha-trypsin inhibitor heavy chain H3 OS=Oryctolagus cuniculus OX=9986 GN=ITIH3 PE=2 SV=1
1	K.TAFITN[+1914.697]FTLWVTIDGVTYPGHVK.E-Fuc(2)Hex(5)HexNAc(4)	-5.92865	-0.745832	-5.71725	-6.00858	-5.68574	>tr|A0A5F9DMU6|A0A5F9DMU6_RABIT Inter-alpha-trypsin inhibitor heavy chain H3 OS=Oryctolagus cuniculus OX=9986 GN=ITIH3 PE=3 SV=1
1	K.TINNIFIPAMGN[+1024.359]ITYEFSFK.S-Pent(1)Hex(3)HexNAc(2)	-6.13885	-0.745832	-5.76328	-5.66593	-5.84281	>tr|G1U9R4|G1U9R4_RABIT Apolipoprotein B OS=Oryctolagus cuniculus OX=9986 GN=APOB PE=4 SV=2
1	K.TLPEPC[+57.021]HFKIYSGVDFGGEELN[+1913.677]VTFVK.G-NeuAc(1)Hex(5)HexNAc(4)	-5.79323	-0.435018	-5.84365	-6.2185	-6.32471	>tr|G1T127|G1T127_RABIT Kallikrein B1 OS=Oryctolagus cuniculus OX=9986 GN=KLKB1 PE=4 SV=2
1	K.TN[+1540.529]R.T-Hex(7)HexNAc(2)	-5.89533	0.527265140466286	-5.80655	-6.26577	-5.75844	>tr|A0A4Z2DIC3|A0A4Z2DIC3_SCHJA Phosphatidylinositol-binding clathrin assembly protein (Fragment) OS=Schistosoma japonicum OX=6182 GN=EWB00_000622 PE=3 SV=1
1	K.TN[+2204.772]GSHVYTK.A-NeuAc(2)Hex(5)HexNAc(4)	0.147260225748679	0.176398772369551	-0.668729	-0.163202	-0.700839	>tr|G1TR31|G1TR31_RABIT Uncharacterized protein OS=Oryctolagus cuniculus OX=9986 PE=3 SV=3
1	K.TN[+2204.772]GSHVYTKALLAYAFALAGNQGR.R-NeuAc(2)Hex(5)HexNAc(4)	-6.34017	-0.784926	-5.90255	-6.22668	-5.98859	>tr|G1TR31|G1TR31_RABIT Uncharacterized protein OS=Oryctolagus cuniculus OX=9986 PE=3 SV=3
1	K.TN[+2715.963]R.T-NeuAc(2)Fuc(1)Hex(6)HexNAc(5)	-6.27737	0.527265140466286	-5.84299	-6.07821	-5.88233	>tr|A0A4Z2DIC3|A0A4Z2DIC3_SCHJA Phosphatidylinositol-binding clathrin assembly protein (Fragment) OS=Schistosoma japonicum OX=6182 GN=EWB00_000622 PE=3 SV=1
1	K.TN[+892.317]R.T-Hex(3)HexNAc(2)	-5.89683	-0.435018	-6.44862	-5.98799	-6.49764	>tr|A0A4Z2DIC3|A0A4Z2DIC3_SCHJA Phosphatidylinositol-binding clathrin assembly protein (Fragment) OS=Schistosoma japonicum OX=6182 GN=EWB00_000622 PE=3 SV=1
1	K.TNN[+1622.582]LSK.K-Hex(5)HexNAc(4)	-5.75579	-0.435018	-6.0179	-5.25886	-6.17224	>tr|G1T6S4|G1T6S4_RABIT Dystonin OS=Oryctolagus cuniculus OX=9986 GN=DST PE=3 SV=3
1	K.TNN[+1751.624]LSKK.F-NeuAc(1)Hex(4)HexNAc(4)	-5.7254	-0.435018	-5.94734	-5.37456	-5.43846	>tr|G1T6S4|G1T6S4_RABIT Dystonin OS=Oryctolagus cuniculus OX=9986 GN=DST PE=3 SV=3
1	K.TPLVQEVHQN[+1378.476]FSAWC[+57.021]SQVVR.L-Hex(6)HexNAc(2)	-6.72067	-0.745832	-6.28536	-6.12881	-6.15554	>tr|A0A5F9DR50|A0A5F9DR50_RABIT Alpha-mannosidase OS=Oryctolagus cuniculus OX=9986 PE=3 SV=1
1	K.TYEDDSPEWFQEDNAIQPN[+2206.813]C[+57.021]SYTYVWHATQR.S-Fuc(4)Hex(5)HexNAc(4)	-6.28036	-0.745832	-5.72673	-6.04926	-6.53643	>tr|A0A5F9DND9|A0A5F9DND9_RABIT Coagulation factor V OS=Oryctolagus cuniculus OX=9986 GN=F5 PE=3 SV=1
1	K.VAGQEDFGWFGYSLHGARVDN[+1225.460]RSLLLVGSPTWK.N-Fuc(2)Hex(2)HexNAc(3)	-6.01249	-0.435018	-6.24186	-6.10476	-6.35121	>tr|G1SD43|G1SD43_RABIT Glycosyl-phosphatidylinositol-specific phospholipase D OS=Oryctolagus cuniculus OX=9986 GN=GPLD1 PE=3 SV=3
1	K.VDAYFRPGLSFFGQVLLVDGKGIPMPN[+2206.813]K.T-Fuc(4)Hex(5)HexNAc(4)	-5.74007	-0.784926	-6.33611	-5.66769	-5.90203	>tr|G1SQ70|G1SQ70_RABIT Alpha-2-macroglobulin OS=Oryctolagus cuniculus OX=9986 GN=A2M PE=3 SV=3
1	K.VEAAQN[+2060.755]LTVPGSLR.A-Fuc(3)Hex(5)HexNAc(4)	-6.28019	-0.435018	-5.90076	-5.99966	-6.10117	>tr|A0A5F9DC52|A0A5F9DC52_RABIT Tenascin C OS=Oryctolagus cuniculus OX=9986 GN=TNC PE=3 SV=1
1	K.VEGSSTHLVTFSVLPLETGLHSIN[+2204.772]FSLETSFGGETLVKTLRVVPEGVK.R-NeuAc(2)Hex(5)HexNAc(4)	-5.5955	-0.784926	-6.02334	-6.11863	-6.17548	>tr|A0A5F9CD07|A0A5F9CD07_RABIT Complement C5 OS=Oryctolagus cuniculus OX=9986 GN=C5 PE=4 SV=1
1	K.VFVHTPTTN[+2116.756]YTLQDYRR.F-NeuAc(1)Hex(5)HexNAc(5)	-6.1481	-0.745832	-6.22484	-6.14524	-6.08879	>tr|G1SVB3|G1SVB3_RABIT Phospholipase A2 group XV OS=Oryctolagus cuniculus OX=9986 GN=PLA2G15 PE=3 SV=1
1	K.VFVHTPTTN[+2715.963]YTLQDYR.R-NeuAc(2)Fuc(1)Hex(6)HexNAc(5)	-5.64189	-0.784926	-6.12356	-6.05521	-6.01704	>tr|G1SVB3|G1SVB3_RABIT Phospholipase A2 group XV OS=Oryctolagus cuniculus OX=9986 GN=PLA2G15 PE=3 SV=1
1	K.VLN[+1913.677]FTMK.A-NeuAc(1)Hex(5)HexNAc(4)	-0.663772	0.527265140466286	-0.189594	-0.61153	-0.672672	>tr|A0A5F9DR45|A0A5F9DR45_RABIT Complement component C6 OS=Oryctolagus cuniculus OX=9986 GN=C6 PE=3 SV=1
1	K.VLNQELRPDGTVNQIEGQATQSN[+1768.640]LTEPAK.L-Fuc(1)Hex(5)HexNAc(4)	-6.04033	-0.784926	-6.11919	-6.05281	-6.221	>sp|P37153|APOD_RABIT Apolipoprotein D OS=Oryctolagus cuniculus OX=9986 GN=APOD PE=2 SV=1
1	K.VN[+1722.634]FTATAEALHPQELC[+57.021]DNEVAEVPALGQK.D-Fuc(2)Pent(1)Hex(3)HexNAc(4)	-6.44663	-0.435018	-5.93094	-6.22803	-5.82933	>tr|A0A5F9C1C5|A0A5F9C1C5_RABIT Uncharacterized protein OS=Oryctolagus cuniculus OX=9986 PE=3 SV=1
1	K.VPKVITILEEEVN[+1768.640]VSVC[+57.021]GIYTYGK.P-Fuc(1)Hex(5)HexNAc(4)	-6.1032	-0.745832	-5.85426	-6.00522	-5.66036	>tr|G1TR31|G1TR31_RABIT Uncharacterized protein OS=Oryctolagus cuniculus OX=9986 PE=3 SV=3
1	K.VPTISIN[+714.269]K.T-Fuc(1)Hex(1)HexNAc(2)	-5.86324	-0.745832	-5.81191	-5.61533	-5.71643	>tr|G1T432|G1T432_RABIT Adenylyl cyclase-associated protein OS=Oryctolagus cuniculus OX=9986 PE=3 SV=1
1	K.VRAIC[+57.021]NN[+1751.624]YTSLGLSSYPNGYPFLFWEQYIGLR.H-NeuAc(1)Hex(4)HexNAc(4)	-5.73657	-0.435018	-5.8562	-6.22413	-5.66387	>tr|G1SIS0|G1SIS0_RABIT Patched 1 OS=Oryctolagus cuniculus OX=9986 GN=PTCH1 PE=3 SV=3
1	K.VSN[+1751.624]QTLSLSFTVVQDIPVIDLKPAIVK.V-NeuAc(1)Hex(4)HexNAc(4)	-5.88594	-0.1967	-6.38159	-5.95272	-6.14159	>tr|G1SQ70|G1SQ70_RABIT Alpha-2-macroglobulin OS=Oryctolagus cuniculus OX=9986 GN=A2M PE=3 SV=3
1	K.VSN[+1751.624]QTLSLSFTVVQEIPVIDLKPAIVK.V-NeuAc(1)Hex(4)HexNAc(4)	-5.84848	1.47792189107119	-6.12851	-6.22202	-5.91537	>tr|A0A5F9CQC0|A0A5F9CQC0_RABIT Alpha-2-macroglobulin OS=Oryctolagus cuniculus OX=9986 GN=A2M PE=3 SV=1
1	K.VSN[+1752.645]QTLSLSFTVVQDIPVIDLKPAIVK.V-Fuc(2)Hex(4)HexNAc(4)	-5.39188	-0.784926	-6.13152	-5.75942	-6.40337	>tr|G1SQ70|G1SQ70_RABIT Alpha-2-macroglobulin OS=Oryctolagus cuniculus OX=9986 GN=A2M PE=3 SV=3
1	K.VSN[+1752.645]QTLSLSFTVVQEIPVIDLKPAIVK.V-Fuc(2)Hex(4)HexNAc(4)	-5.98061	-0.745832	-6.13875	-6.30029	-5.63314	>tr|A0A5F9CQC0|A0A5F9CQC0_RABIT Alpha-2-macroglobulin OS=Oryctolagus cuniculus OX=9986 GN=A2M PE=3 SV=1
1	K.VTHTLLN[+2407.852]SSC[+57.021]DPFR.Y-NeuAc(2)Hex(5)HexNAc(5)	-5.86073	-0.745832	-5.86972	-6.10806	-6.01212	>tr|A0A4Z2CP65|A0A4Z2CP65_SCHJA Uncharacterized protein OS=Schistosoma japonicum OX=6182 GN=EWB00_008685 PE=4 SV=1
1	K.VTMPKIITFLEEEVN[+1751.624]VSVC[+57.021]GIYTYGKAVPGHVTMK.I-NeuAc(1)Hex(4)HexNAc(4)	-6.01205	-0.745832	-6.06896	-6.45543	-6.04215	>tr|G1SQ70|G1SQ70_RABIT Alpha-2-macroglobulin OS=Oryctolagus cuniculus OX=9986 GN=A2M PE=3 SV=3
1	K.VTPKSLGSVN[+1316.475]FTVSAEALESQELC[+57.021]ENEVAVVPEHGK.K-Fuc(2)Pent(1)Hex(3)HexNAc(2)	-5.96368	-0.745832	-5.99797	-6.21297	-5.97137	>tr|G1SQ70|G1SQ70_RABIT Alpha-2-macroglobulin OS=Oryctolagus cuniculus OX=9986 GN=A2M PE=3 SV=3
1	K.VTVAYAEN[+1038.375]GTVLQGSTVAAVYKGKMLVGTVFHK.A-Fuc(1)Hex(3)HexNAc(2)	-6.09399	-0.745832	-6.52526	-5.85539	-6.00436	>sp|P27170|PON1_RABIT Serum paraoxonase/arylesterase 1 OS=Oryctolagus cuniculus OX=9986 GN=PON1 PE=1 SV=2
1	K.VVITYSSHHVYNN[+2424.867]LTEEQK.G-NeuAc(1)Fuc(1)Hex(6)HexNAc(5)	-6.2092	-0.435018	-5.87529	-6.78157	-6.39049	>tr|A0A5F9DK98|A0A5F9DK98_RABIT Heat shock protein family A (Hsp70) member 8 OS=Oryctolagus cuniculus OX=9986 GN=HSPA8 PE=3 SV=1
1	K.VVLHPN[+2245.799]YSEVDIGLIK.L-NeuAc(2)Hex(4)HexNAc(5)	-5.75675	-0.784926	-5.69756	-5.95795	-6.01022	>tr|G1SWF6|G1SWF6_RABIT Haptoglobin OS=Oryctolagus cuniculus OX=9986 PE=3 SV=1
1	K.VVLHPN[+2553.910]YSEVDIGLIK.L-NeuAc(2)Fuc(1)Hex(5)HexNAc(5)	-6.16226	-0.784926	-5.79279	-6.21197	-5.9848	>tr|G1SWF6|G1SWF6_RABIT Haptoglobin OS=Oryctolagus cuniculus OX=9986 PE=3 SV=1
1	K.VWPRRPTGEVYELEIDTLETTC[+57.021]HALDPTPLAN[+1378.476]C[+57.021]SVR.Q-Hex(6)HexNAc(2)	-6.05236	-0.784926	-5.62354	-6.05406	-6.10597	>tr|U3KMR2|U3KMR2_RABIT Alpha-2-HS-glycoprotein OS=Oryctolagus cuniculus OX=9986 GN=AHSG PE=4 SV=1
1	K.VYSLSWGEVNLLSN[+1914.697]C[+57.021]SK.F-Fuc(2)Hex(5)HexNAc(4)	-6.17743	-0.784926	-5.89987	-5.82548	-6.13966	>tr|A0A5F9CAP0|A0A5F9CAP0_RABIT Uncharacterized protein OS=Oryctolagus cuniculus OX=9986 PE=4 SV=1
1	K.VYSLSWGEVNLLSN[+2204.772]C[+57.021]SK.F-NeuAc(2)Hex(5)HexNAc(4)	0.879275747017967	2.00882060633013	0.578474446993483	0.796156692151361	0.923673760300171	>tr|A0A5F9CAP0|A0A5F9CAP0_RABIT Uncharacterized protein OS=Oryctolagus cuniculus OX=9986 PE=4 SV=1
1	K.WEKPFEPENTKEEDFHVN[+2262.814]ATTTVR.V-NeuAc(1)Fuc(1)Hex(5)HexNAc(5)	-5.38917	-0.581775	-5.93919	-6.05194	-5.53064	>tr|A0A5F9DT67|A0A5F9DT67_RABIT SERPIN domain-containing protein OS=Oryctolagus cuniculus OX=9986 GN=SERPINA1 PE=3 SV=1
1	K.WEKPFEPENTKEEDFHVN[+2407.852]ATTTVR.V-NeuAc(2)Hex(5)HexNAc(5)	-6.09795	0.176398772369551	-5.57393	-6.17996	-6.01366	>tr|A0A5F9DT67|A0A5F9DT67_RABIT SERPIN domain-containing protein OS=Oryctolagus cuniculus OX=9986 GN=SERPINA1 PE=3 SV=1
1	K.YKISETGHDIALIQLQAPLN[+1913.677]DTDIQKPIC[+57.021]LPSK.D-NeuAc(1)Hex(5)HexNAc(4)	-6.30285	-0.745832	-6.19067	-5.53902	-6.34347	>tr|G1T127|G1T127_RABIT Kallikrein B1 OS=Oryctolagus cuniculus OX=9986 GN=KLKB1 PE=4 SV=2
1	K.YLN[+1389.492]ETHQLTPELK.S-Pent(1)Hex(4)HexNAc(3)	-6.39251	-0.745832	-5.2846	-5.78655	-5.88234	>tr|G1TR31|G1TR31_RABIT Uncharacterized protein OS=Oryctolagus cuniculus OX=9986 PE=3 SV=3
1	K.YLN[+1913.677]ETHQLTPELK.S-NeuAc(1)Hex(5)HexNAc(4)	-5.84174	-0.765241	-5.99554	-5.79351	-5.9891	>tr|G1TR31|G1TR31_RABIT Uncharacterized protein OS=Oryctolagus cuniculus OX=9986 PE=3 SV=3
1	K.YLN[+1914.697]ETHQLTPELK.S-Fuc(2)Hex(5)HexNAc(4)	-6.16006	-0.745832	-5.65485	-6.10679	-5.26417	>tr|G1TR31|G1TR31_RABIT Uncharacterized protein OS=Oryctolagus cuniculus OX=9986 PE=3 SV=3
1	K.YN[+1914.697]ITLK.W-Fuc(2)Hex(5)HexNAc(4)	-6.06974	-0.745832	-5.82215	-5.99076	-6.3474	>tr|A0A5F9CG95|A0A5F9CG95_RABIT Uncharacterized protein OS=Oryctolagus cuniculus OX=9986 PE=4 SV=1
1	K.YN[+2715.963]ATINKYNHDIALLELDK.P-NeuAc(2)Fuc(1)Hex(6)HexNAc(5)	-5.739	-0.435018	-6.26934	-6.11469	-6.09071	>tr|G1U9U2|G1U9U2_RABIT Christmas factor OS=Oryctolagus cuniculus OX=9986 GN=F9 PE=4 SV=1
1	K.YVMLPVADQDKC[+57.021]IQHYEN[+2204.772]STVPENK.I-NeuAc(2)Hex(5)HexNAc(4)	-5.77738	-0.581775	-5.85586	-5.67881	-5.64956	>tr|G1SWF6|G1SWF6_RABIT Haptoglobin OS=Oryctolagus cuniculus OX=9986 PE=3 SV=1
1	K.YVYIAELLAHKIHVYEKHAN[+2206.813]WTLTPLK.S-Fuc(4)Hex(5)HexNAc(4)	-5.95444	-0.784926	-6.3296	-6.01283	-5.88194	>sp|P27170|PON1_RABIT Serum paraoxonase/arylesterase 1 OS=Oryctolagus cuniculus OX=9986 GN=PON1 PE=1 SV=2
1	K.YVYIAELLAHKIHVYEKHAN[+2245.799]WTLTPLK.S-NeuAc(2)Hex(4)HexNAc(5)	-5.9874	-0.784926	-5.90006	-5.838	-6.4577	>sp|P27170|PON1_RABIT Serum paraoxonase/arylesterase 1 OS=Oryctolagus cuniculus OX=9986 GN=PON1 PE=1 SV=2
1	R.ADLSFDVEASNLENPEDVIISC[+57.021]EVFNFEEHGN[+1024.359]ISGFRPHLGKTPLGTDGSR.D-Pent(1)Hex(3)HexNAc(2)	-6.30314	-0.784926	-5.88503	-5.83144	-5.48995	>tr|G1U754|G1U754_RABIT Histidine-rich glycoprotein OS=Oryctolagus cuniculus OX=9986 GN=HRG PE=4 SV=3
1	R.ADLSFDVEASNLENPEDVIISC[+57.021]EVFNFEEHGN[+1913.677]ISGFRPHLGK.T-NeuAc(1)Hex(5)HexNAc(4)	-5.27963	0.176398772369551	-6.21918	-5.5887	-6.36823	>tr|G1U754|G1U754_RABIT Histidine-rich glycoprotein OS=Oryctolagus cuniculus OX=9986 GN=HRG PE=4 SV=3
1	R.AGLTSRPHTAVDSELPPN[+1378.476]VSVFIPPR.D-Hex(6)HexNAc(2)	-5.48665	-0.784926	-6.04555	-5.57182	-6.38101	>tr|G1TK85|G1TK85_RABIT Immunoglobulin heavy constant mu OS=Oryctolagus cuniculus OX=9986 GN=IGHM PE=4 SV=2
1	R.AGPN[+1389.492]GTLFVADAYK.G-Pent(1)Hex(4)HexNAc(3)	-6.69645	-0.784926	-5.90159	-5.59216	-6.23683	>tr|A0A5F9C6C9|A0A5F9C6C9_RABIT Adipocyte plasma membrane-associated protein OS=Oryctolagus cuniculus OX=9986 GN=APMAP PE=3 SV=1
1	R.AGPN[+1913.677]GTLFVADAYK.G-NeuAc(1)Hex(5)HexNAc(4)	-5.59076	-0.784926	-6.17309	-6.28569	-5.78242	>tr|A0A5F9C6C9|A0A5F9C6C9_RABIT Adipocyte plasma membrane-associated protein OS=Oryctolagus cuniculus OX=9986 GN=APMAP PE=3 SV=1
1	R.AIINDWISN[+1622.582]K.T-Hex(5)HexNAc(4)	-6.0807	-0.435018	-6.01994	-5.68182	-5.53698	>tr|G1SIK0|G1SIK0_RABIT Antithrombin-III OS=Oryctolagus cuniculus OX=9986 GN=SERPINC1 PE=3 SV=1
1	R.ALGFQN[+3517.228]ATEALGR.A-NeuAc(4)Hex(7)HexNAc(6)	-5.76837	-0.765241	-6.08959	-6.0736	-5.6125	>tr|G1TFU9|G1TFU9_RABIT Galectin-3-binding protein OS=Oryctolagus cuniculus OX=9986 GN=LGALS3BP PE=4 SV=2
1	R.ALVN[+1548.545]FTHSIEYSPR.L-NeuAc(1)Hex(4)HexNAc(3)	-5.99294	-0.745832	-5.37332	-6.14776	-6.01904	>tr|G1TN89|G1TN89_RABIT Heparan sulfate proteoglycan 2 OS=Oryctolagus cuniculus OX=9986 GN=HSPG2 PE=4 SV=3
1	R.ANN[+2204.772]C[+57.021]TYFFGDIVVYSC[+57.021]YQK.Q-NeuAc(2)Hex(5)HexNAc(4)	-6.03759	-0.581775	-6.37221	-6.33283	-6.28647	>tr|A0A5F9CJA1|A0A5F9CJA1_RABIT Uncharacterized protein OS=Oryctolagus cuniculus OX=9986 PE=4 SV=1
1	R.ANN[+2206.813]C[+57.021]TYFFGDIVVYSC[+57.021]YQK.Q-Fuc(4)Hex(5)HexNAc(4)	-6.62725	-0.435018	-5.77092	-6.6511	-5.97877	>tr|A0A5F9CJA1|A0A5F9CJA1_RABIT Uncharacterized protein OS=Oryctolagus cuniculus OX=9986 PE=4 SV=1
1	R.AVSVVDSAN[+1548.545]YSC[+57.021]VYVDPAPPFAGSVASEPLELR.V-NeuAc(1)Hex(4)HexNAc(3)	-6.33983	-0.784926	-6.44395	-5.94431	-6.58782	>tr|G1SYM4|G1SYM4_RABIT Alpha-1B-glycoprotein OS=Oryctolagus cuniculus OX=9986 GN=A1BG PE=4 SV=2
1	R.AVSVVDSAN[+2204.772]YSC[+57.021]VYVDPAPPFAGSVASEPLELR.V-NeuAc(2)Hex(5)HexNAc(4)	3.38383982945558	3.43733270377007	2.06083138703209	2.55737543774208	2.39445845001111	>tr|G1SYM4|G1SYM4_RABIT Alpha-1B-glycoprotein OS=Oryctolagus cuniculus OX=9986 GN=A1BG PE=4 SV=2
1	R.AVSVVDSAN[+2206.813]YSC[+57.021]VYVDPAPPFAGSVASEPLELR.V-Fuc(4)Hex(5)HexNAc(4)	-0.629762	2.08217812687762	-0.852159	0.140106577123511	0.548351299535256	>tr|G1SYM4|G1SYM4_RABIT Alpha-1B-glycoprotein OS=Oryctolagus cuniculus OX=9986 GN=A1BG PE=4 SV=2
1	R.AVSVVDSAN[+2263.835]YSC[+57.021]VYVDPAPPFAGSVASEPLELR.V-Fuc(3)Hex(5)HexNAc(5)	-5.94492	-0.745832	-5.99211	-6.16064	-6.03749	>tr|G1SYM4|G1SYM4_RABIT Alpha-1B-glycoprotein OS=Oryctolagus cuniculus OX=9986 GN=A1BG PE=4 SV=2
1	R.AVSVVDSAN[+2861.000]YSC[+57.021]VYVDPAPPFAGSVASEPLELR.V-NeuAc(3)Hex(6)HexNAc(5)	-5.87854	-0.745832	-5.75757	-5.60529	-6.28685	>tr|G1SYM4|G1SYM4_RABIT Alpha-1B-glycoprotein OS=Oryctolagus cuniculus OX=9986 GN=A1BG PE=4 SV=2
1	R.C[+57.021]C[+57.021]LLPQAN[+2204.772]C[+57.021]SVHTAPPAR.A-NeuAc(2)Hex(5)HexNAc(4)	-6.32563	-0.209757	-5.82528	-5.56591	-5.85174	>tr|A0A5F9DJY7|A0A5F9DJY7_RABIT Proprotein convertase 9 OS=Oryctolagus cuniculus OX=9986 GN=PCSK9 PE=3 SV=1
1	R.C[+57.021]GLVPVLAESYDTTN[+2861.000]ATEK.L-NeuAc(3)Hex(6)HexNAc(5)	-5.89951	0.215612243450288	-5.80948	-5.70205	-5.88123	>tr|G1TKE4|G1TKE4_RABIT Uncharacterized protein OS=Oryctolagus cuniculus OX=9986 PE=3 SV=1
1	R.C[+57.021]N[+1752.645]YSIR.V-Fuc(2)Hex(4)HexNAc(4)	-5.83638	-0.435018	-5.80045	-6.20195	-6.36053	>tr|G1T7H9|G1T7H9_RABIT Complement C1r OS=Oryctolagus cuniculus OX=9986 GN=C1R PE=4 SV=2
1	R.DFVN[+1913.677]ASSK.Y-NeuAc(1)Hex(5)HexNAc(4)	0.187490070772565	0.315478223114547	-0.319969	0.302186910798418	0.0057244580162851	>tr|G1SWF0|G1SWF0_RABIT Heparin cofactor 2 OS=Oryctolagus cuniculus OX=9986 GN=SERPIND1 PE=3 SV=1
1	R.DPVQLNLLYVQARDDILN[+2116.756]GSHPVSFDK.A-NeuAc(1)Hex(5)HexNAc(5)	-6.21555	-0.784926	-6.66803	-5.51991	-5.90581	>tr|A0A5F9DB63|A0A5F9DB63_RABIT Talin 1 OS=Oryctolagus cuniculus OX=9986 GN=TLN1 PE=4 SV=1
1	R.EALAIVFFGAQPQPN[+1872.651]VSELLVGPLPHPSYMR.D-NeuAc(1)Hex(6)HexNAc(3)	0.515909362963373	0.779072688077658	-6.06216	-0.79502	-6.23895	>tr|A0A5F9DJG6|A0A5F9DJG6_RABIT Amine oxidase OS=Oryctolagus cuniculus OX=9986 GN=AOC3 PE=3 SV=1
1	R.EGDSTFLEVAEAGPDGQATFPVHQAGN[+2204.772]YSC[+57.021]SYR.T-NeuAc(2)Hex(5)HexNAc(4)	1.55184617995826	3.31703620888087	1.82214796310871	0.937139256405843	1.58474859672043	>tr|G1SYM4|G1SYM4_RABIT Alpha-1B-glycoprotein OS=Oryctolagus cuniculus OX=9986 GN=A1BG PE=4 SV=2
1	R.EGDSTFLEVAEAGPDGQATFPVHQAGN[+2861.000]YSC[+57.021]SYR.T-NeuAc(3)Hex(6)HexNAc(5)	-5.79435	-0.745832	-6.05534	-6.1911	-5.52881	>tr|G1SYM4|G1SYM4_RABIT Alpha-1B-glycoprotein OS=Oryctolagus cuniculus OX=9986 GN=A1BG PE=4 SV=2
1	R.EGHFYYN[+2059.735]ISDVK.V-NeuAc(1)Fuc(1)Hex(5)HexNAc(4)	-5.63493	-0.765241	-5.79948	-0.835796	-6.37943	>tr|Q8WMQ5|Q8WMQ5_RABIT Phospholipid transfer protein OS=Oryctolagus cuniculus OX=9986 GN=PLTP PE=2 SV=1
1	R.EGHFYYN[+2060.755]ISDVK.V-Fuc(3)Hex(5)HexNAc(4)	-5.76145	-0.784926	-6.00857	-5.10122	-5.79816	>tr|A0A5F9C720|A0A5F9C720_RABIT Phospholipid transfer protein OS=Oryctolagus cuniculus OX=9986 GN=PLTP PE=3 SV=1
1	R.EIC[+57.021]EEQVNSLAASIN[+2060.755]K.S-Fuc(3)Hex(5)HexNAc(4)	-6.56226	-0.765241	-5.23047	-6.44999	-5.85014	>tr|G1STJ4|G1STJ4_RABIT Complement C3 alpha chain OS=Oryctolagus cuniculus OX=9986 PE=4 SV=3
1	R.EIC[+57.021]EEQVNSLAASIN[+2262.814]K.S-NeuAc(1)Fuc(1)Hex(5)HexNAc(5)	-5.76843	-0.745832	-6.19896	-6.27572	-5.8977	>tr|G1STJ4|G1STJ4_RABIT Complement C3 alpha chain OS=Oryctolagus cuniculus OX=9986 PE=4 SV=3
1	R.ELN[+2717.978]YTR.Q-Hex(8)HexNAc(7)	-6.34774	-0.435018	-6.4258	-6.00578	-6.25127	>tr|G1SIS0|G1SIS0_RABIT Patched 1 OS=Oryctolagus cuniculus OX=9986 GN=PTCH1 PE=3 SV=3
1	R.EN[+1419.502]R.S-Hex(5)HexNAc(3)	-6.21281	-0.435018	-6.28448	-6.13482	-5.4948	>tr|A0A5F9CQC0|A0A5F9CQC0_RABIT Alpha-2-macroglobulin OS=Oryctolagus cuniculus OX=9986 GN=A2M PE=3 SV=1
1	R.EN[+1751.624]R.S-NeuAc(1)Hex(4)HexNAc(4)	-6.3625	-0.745832	-6.20125	-6.19935	-6.03324	>tr|A0A5F9CQC0|A0A5F9CQC0_RABIT Alpha-2-macroglobulin OS=Oryctolagus cuniculus OX=9986 GN=A2M PE=3 SV=1
1	R.EN[+1954.704]ISDPTSPLR.T-NeuAc(1)Hex(4)HexNAc(5)	-6.09896	-0.784926	-6.20342	-5.66266	-5.88216	>sp|P23108|IGJ_RABIT Immunoglobulin J chain OS=Oryctolagus cuniculus OX=9986 GN=JCHAIN PE=1 SV=1
1	R.EN[+2262.814]R.S-NeuAc(1)Fuc(1)Hex(5)HexNAc(5)	-5.36814	-0.784926	-7.10139	-6.16939	-5.81093	>tr|A0A5F9CQC0|A0A5F9CQC0_RABIT Alpha-2-macroglobulin OS=Oryctolagus cuniculus OX=9986 GN=A2M PE=3 SV=1
1	R.EN[+2457.877]R.S-Fuc(1)Hex(8)HexNAc(5)	-5.66054	-0.435018	-6.30892	-6.07808	-6.08013	>tr|A0A5F9CQC0|A0A5F9CQC0_RABIT Alpha-2-macroglobulin OS=Oryctolagus cuniculus OX=9986 GN=A2M PE=3 SV=1
1	R.EN[+4028.418]R.S-NeuAc(4)Fuc(1)Hex(8)HexNAc(7)	-6.1327	-0.435018	-6.12713	-5.57717	-6.54545	>tr|A0A5F9CQC0|A0A5F9CQC0_RABIT Alpha-2-macroglobulin OS=Oryctolagus cuniculus OX=9986 GN=A2M PE=3 SV=1
1	R.ESN[+1913.677]TTNIFFSPVSIALAFAMLSLGAK.G-NeuAc(1)Hex(5)HexNAc(4)	-5.78249	-0.435018	-5.71015	-6.24175	-5.22186	>tr|Q28666|Q28666_RABIT Alpha-1-antitrypsin OS=Oryctolagus cuniculus OX=9986 PE=2 SV=1
1	R.EVAHESN[+1914.697]TTNIFFSPVSISLAFAMLSLGAK.G-Fuc(2)Hex(5)HexNAc(4)	-6.1018	-0.745832	-6.59067	-5.97263	-5.60424	>tr|O62663|O62663_RABIT ATS-22 OS=Oryctolagus cuniculus OX=9986 PE=2 SV=1
1	R.EVAHESN[+2245.799]TTNIFFSPVSIALAFAMLSLGAK.G-NeuAc(2)Hex(4)HexNAc(5)	-5.71807	-0.784926	-6.60616	-5.82464	-6.07339	>tr|G1TGM8|G1TGM8_RABIT SERPIN domain-containing protein OS=Oryctolagus cuniculus OX=9986 GN=SERPINA1 PE=3 SV=1
1	R.EVAHESN[+2569.905]TTNIFFSPVSIALAFAMLSLGAK.G-NeuAc(2)Hex(6)HexNAc(5)	-6.08735	-0.784926	-6.23571	-6.52121	-6.17846	>tr|G1TGM8|G1TGM8_RABIT SERPIN domain-containing protein OS=Oryctolagus cuniculus OX=9986 GN=SERPINA1 PE=3 SV=1
1	R.EYITTN[+714.269]NTC[+57.021]FYNSSIVR.V-Fuc(1)Hex(1)HexNAc(2)	-6.01641	-0.784926	-5.86715	-6.4536	-5.8671	>sp|P25227|A1AG_RABIT Alpha-1-acid glycoprotein OS=Oryctolagus cuniculus OX=9986 GN=ORM1 PE=2 SV=1
1	R.FAPPQPAEPWSYVKN[+1694.603]TTSYPPMC[+57.021]SQDAVSGHMLSELFTNR.K-NeuAc(1)Fuc(1)Hex(4)HexNAc(3)	-5.88308	-0.745832	-6.20799	-6.55907	-6.11209	>tr|A0A5F9CL28|A0A5F9CL28_RABIT Carboxylic ester hydrolase OS=Oryctolagus cuniculus OX=9986 PE=3 SV=1
1	R.FAPPQPAEPWSYVKN[+2407.852]TTSYPPMC[+57.021]SQDAVSGHMLSELFTNR.K-NeuAc(2)Hex(5)HexNAc(5)	-6.21173	-0.745832	-5.91179	-5.53689	-5.94205	>tr|A0A5F9CL28|A0A5F9CL28_RABIT Carboxylic ester hydrolase OS=Oryctolagus cuniculus OX=9986 PE=3 SV=1
1	R.FDEFFRQGC[+57.021]APGSQKN[+1298.476]SSLC[+57.021]ELC[+57.021]VGPSVC[+57.021]APNNR.E-Hex(3)HexNAc(4)	-5.7797	-0.435018	-5.90436	-6.12656	-6.02063	>sp|P19134|TRFE_RABIT Serotransferrin OS=Oryctolagus cuniculus OX=9986 GN=TF PE=1 SV=4
1	R.FDEFFRQGC[+57.021]APGSQKN[+1954.704]SSLC[+57.021]ELC[+57.021]IGPSVC[+57.021]APNNR.E-NeuAc(1)Hex(4)HexNAc(5)	-6.16149	-0.435018	-5.97036	-5.97397	-6.24823	>tr|G1STF7|G1STF7_RABIT Beta-1 metal-binding globulin OS=Oryctolagus cuniculus OX=9986 PE=3 SV=1
1	R.FDEFFRQGC[+57.021]APGSQKN[+1971.719]SSLC[+57.021]ELC[+57.021]VGPSVC[+57.021]APNNR.E-Fuc(1)Hex(5)HexNAc(5)	-6.32482	-0.435018	-5.46027	-5.68657	-6.07883	>sp|P19134|TRFE_RABIT Serotransferrin OS=Oryctolagus cuniculus OX=9986 GN=TF PE=1 SV=4
1	R.FDEFFRQGC[+57.021]APGSQKN[+1987.714]SSLC[+57.021]ELC[+57.021]IGPSVC[+57.021]APNNR.E-Hex(6)HexNAc(5)	-5.74566	-0.745832	-5.93844	-6.24203	-6.49452	>tr|G1STF7|G1STF7_RABIT Beta-1 metal-binding globulin OS=Oryctolagus cuniculus OX=9986 PE=3 SV=1
1	R.FDEFFRQGC[+57.021]APGSQKN[+2133.772]SSLC[+57.021]ELC[+57.021]IGPSVC[+57.021]APNNR.E-Fuc(1)Hex(6)HexNAc(5)	-6.0874	-0.435018	-6.25664	-6.10149	-5.63893	>tr|G1STF7|G1STF7_RABIT Beta-1 metal-binding globulin OS=Oryctolagus cuniculus OX=9986 PE=3 SV=1
1	R.FEAGQVNVVLIPNN[+2553.910]GTGGWWSLK.L-NeuAc(2)Fuc(1)Hex(5)HexNAc(5)	-5.28283	-0.784926	-5.97708	-0.835796	-6.50617	>tr|A0A5F9DI44|A0A5F9DI44_RABIT Amine oxidase OS=Oryctolagus cuniculus OX=9986 GN=AOC3 PE=3 SV=1
1	R.FKPTLSQQQQAAGQPDSALN[+1954.704]GSFIIR.Y-NeuAc(1)Hex(4)HexNAc(5)	-6.38659	-0.745832	-5.70073	-6.09584	-5.48502	>tr|Q9GLY4|Q9GLY4_RABIT Inter-alpha-trypsin inhibitor heavy chain4 OS=Oryctolagus cuniculus OX=9986 GN=ITI-HC4 PE=2 SV=1
1	R.FKPTLSQQQQAAGQPDTALN[+1622.582]GSFIIR.Y-Hex(5)HexNAc(4)	-5.98042	-0.784926	-5.77241	-6.02012	-5.93684	>tr|G1TY29|G1TY29_RABIT Uncharacterized protein OS=Oryctolagus cuniculus OX=9986 GN=ITIH4 PE=4 SV=2
1	R.FKPTLSQQQQAAGQPDTALN[+2206.813]GSFIIR.Y-Fuc(4)Hex(5)HexNAc(4)	-5.32194	-0.784926	-5.97517	-5.6577	-6.14136	>tr|G1TY29|G1TY29_RABIT Uncharacterized protein OS=Oryctolagus cuniculus OX=9986 GN=ITIH4 PE=4 SV=2
1	R.FLFYN[+1913.677]R.S-NeuAc(1)Hex(5)HexNAc(4)	-5.60559	-0.745832	-5.69804	-6.02909	-5.84672	>tr|G1SU36|G1SU36_RABIT Apolipoprotein M OS=Oryctolagus cuniculus OX=9986 GN=APOM PE=3 SV=1
1	R.FN[+1711.618]GSVSFFR.G-Fuc(2)Hex(5)HexNAc(3)	-6.12444	-0.784926	-5.5223	-6.11583	-5.78919	>tr|G1T8V2|G1T8V2_RABIT Microfibril associated protein 4 OS=Oryctolagus cuniculus OX=9986 GN=MFAP4 PE=4 SV=2
1	R.FN[+2206.813]ETHAIANWLLEK.R-Fuc(4)Hex(5)HexNAc(4)	-5.70184	-0.581775	-6.0063	-5.93028	-6.28615	>tr|G1SYK4|G1SYK4_RABIT Uncharacterized protein OS=Oryctolagus cuniculus OX=9986 PE=4 SV=2
1	R.FSDSLESN[+1864.634]SSTQFEVK.K-Hex(9)HexNAc(2)	-6.29332	0.186306104188603	-5.47965	-5.9968	-5.75209	>tr|G1SS91|G1SS91_RABIT C4a anaphylatoxin OS=Oryctolagus cuniculus OX=9986 PE=4 SV=2
1	R.FSN[+2204.772]C[+57.021]SVDNGGC[+57.021]AHYC[+57.021]LEEEAGR.S-NeuAc(2)Hex(5)HexNAc(4)	-5.38535	-0.745832	-5.89997	-5.30155	-5.75684	>sp|Q28661|PROC_RABIT Vitamin K-dependent protein C (Fragment) OS=Oryctolagus cuniculus OX=9986 GN=PROC PE=2 SV=1
1	R.FTC[+57.021]SVAHTPSATHTN[+1702.581]KTFQGDDR.A-Hex(8)HexNAc(2)	-5.63207	-0.435018	-6.31214	-5.98208	-6.00182	>tr|A0A5F9DLH0|A0A5F9DLH0_RABIT Uncharacterized protein OS=Oryctolagus cuniculus OX=9986 PE=4 SV=1
1	R.GAFFPLAEGN[+2350.830]WSFLNR.A-NeuAc(2)Fuc(1)Hex(5)HexNAc(4)	-5.77722	-0.745832	-6.10719	-5.957	-5.55109	>tr|Q8WMQ5|Q8WMQ5_RABIT Phospholipid transfer protein OS=Oryctolagus cuniculus OX=9986 GN=PLTP PE=2 SV=1
1	R.GALAAMGIADLFTNQAN[+1913.677]FSSISQEGPLK.V-NeuAc(1)Hex(5)HexNAc(4)	-5.3573	-0.646255	-5.64629	-6.15892	-6.10038	>sp|P23775|CBG_RABIT Corticosteroid-binding globulin OS=Oryctolagus cuniculus OX=9986 GN=SERPINA6 PE=1 SV=1
1	R.GALAAMGIADLFTNQAN[+2204.772]FSSISQEGPLK.V-NeuAc(2)Hex(5)HexNAc(4)	-5.37307	0.766110707248067	-5.73002	-0.755305	-6.2115	>sp|P23775|CBG_RABIT Corticosteroid-binding globulin OS=Oryctolagus cuniculus OX=9986 GN=SERPINA6 PE=1 SV=1
1	R.GDN[+2059.735]ASLEAVFVK.R-NeuAc(1)Fuc(1)Hex(5)HexNAc(4)	-5.9454	-0.435018	-6.18971	-5.99712	-5.97652	>tr|G1T0Q0|G1T0Q0_RABIT Fibulin 1 OS=Oryctolagus cuniculus OX=9986 GN=FBLN1 PE=3 SV=2
1	R.GFLAVYQAVAVN[+2206.813]SSQPITK.A-Fuc(4)Hex(5)HexNAc(4)	-4.90813	0.0157761487075127	-6.51038	-6.42014	-6.01256	>tr|A0A5F9CYP3|A0A5F9CYP3_RABIT Complement C1r OS=Oryctolagus cuniculus OX=9986 GN=C1R PE=4 SV=1
1	R.GIFFDKN[+1768.640]VSMSSEC[+57.021]STTPSPGIQVFPIAPSFADTFLSK.S-Fuc(1)Hex(5)HexNAc(4)	-6.32213	-0.745832	-5.80781	-5.91627	-6.4162	>sp|P03988|IGHM_RABIT Ig mu chain C region secreted form OS=Oryctolagus cuniculus OX=9986 PE=2 SV=1
1	R.GIFFDKN[+2190.793]VSMSSEC[+57.021]STTPSPGIQVFPIAPSFADTFLSK.S-Hex(6)HexNAc(6)	-5.59745	-0.784926	-5.94206	-6.31134	-5.97362	>sp|P03988|IGHM_RABIT Ig mu chain C region secreted form OS=Oryctolagus cuniculus OX=9986 PE=2 SV=1
1	R.GIFFDKN[+2498.904]VSMSSEC[+57.021]STTPSPGIQVFPIAPSFADTFLSK.S-Fuc(1)Hex(7)HexNAc(6)	-5.67397	-0.745832	-6.42852	-5.8366	-5.58495	>sp|P03988|IGHM_RABIT Ig mu chain C region secreted form OS=Oryctolagus cuniculus OX=9986 PE=2 SV=1
1	R.GLN[+1914.697]LTDDAYAPR.I-Fuc(2)Hex(5)HexNAc(4)	-5.89593	-0.435018	-6.04568	-6.02894	-6.21263	>tr|G1TFU9|G1TFU9_RABIT Galectin-3-binding protein OS=Oryctolagus cuniculus OX=9986 GN=LGALS3BP PE=4 SV=2
1	R.GLNMAATFIGN[+2245.799]NTAIQELFGR.V-NeuAc(2)Hex(4)HexNAc(5)	-6.07128	-0.435018	-5.33643	-6.08847	-6.02617	>tr|A0A5F9C791|A0A5F9C791_RABIT Tubulin beta 1 class VI OS=Oryctolagus cuniculus OX=9986 GN=TUBB1 PE=3 SV=1
1	R.GRVHTGN[+1987.714]VTFYMESSVAEQEEAFR.S-Hex(6)HexNAc(5)	-6.12322	-0.745832	-6.19842	-5.55819	-6.06067	>tr|G1TY29|G1TY29_RABIT Uncharacterized protein OS=Oryctolagus cuniculus OX=9986 GN=ITIH4 PE=4 SV=2
1	R.HAQDAGVVC[+57.021]TN[+2206.813]ETR.S-Fuc(4)Hex(5)HexNAc(4)	-6.61087	-0.435018	-5.74301	-6.21419	-6.21886	>tr|G1TFU9|G1TFU9_RABIT Galectin-3-binding protein OS=Oryctolagus cuniculus OX=9986 GN=LGALS3BP PE=4 SV=2
1	R.HAQDAGVVC[+57.021]TN[+2352.846]ETR.S-Hex(7)HexNAc(6)	-5.74581	-0.745832	-5.90575	-6.24875	-6.42285	>tr|G1TFU9|G1TFU9_RABIT Galectin-3-binding protein OS=Oryctolagus cuniculus OX=9986 GN=LGALS3BP PE=4 SV=2
1	R.HGAPLVPVYSFGEN[+1913.677]DSFKSK.T-NeuAc(1)Hex(5)HexNAc(4)	-6.35137	-0.435018	-5.92139	-5.77952	-6.06246	>tr|A0A5F9CXY4|A0A5F9CXY4_RABIT Acyltransferase OS=Oryctolagus cuniculus OX=9986 PE=3 SV=1
1	R.HN[+1225.460]K.T-Fuc(2)Hex(2)HexNAc(3)	-6.29803	-0.745832	-6.13588	-6.2901	-5.92179	>tr|B7NZA0|B7NZA0_RABIT Serine proteinase inhibitor, clade B, member 10 (Predicted) OS=Oryctolagus cuniculus OX=9986 GN=SERPINB10 PE=3 SV=1
1	R.HN[+1519.555]K.T-Fuc(2)Pent(1)Hex(3)HexNAc(3)	-6.43027	-0.435018	-5.96467	-5.33029	-4.98693	>tr|B7NZA0|B7NZA0_RABIT Serine proteinase inhibitor, clade B, member 10 (Predicted) OS=Oryctolagus cuniculus OX=9986 GN=SERPINB10 PE=3 SV=1
1	R.HN[+1663.608]K.T-Hex(4)HexNAc(5)	-6.25885	-0.784926	-5.59202	-5.95268	-5.88013	>tr|B7NZA0|B7NZA0_RABIT Serine proteinase inhibitor, clade B, member 10 (Predicted) OS=Oryctolagus cuniculus OX=9986 GN=SERPINB10 PE=3 SV=1
1	R.HN[+1710.598]K.T-NeuAc(1)Hex(5)HexNAc(3)	-6.19669	-0.435018	-5.98866	-6.20622	-5.39891	>tr|B7NZA0|B7NZA0_RABIT Serine proteinase inhibitor, clade B, member 10 (Predicted) OS=Oryctolagus cuniculus OX=9986 GN=SERPINB10 PE=3 SV=1
1	R.HN[+1872.651]K.T-NeuAc(1)Hex(6)HexNAc(3)	-6.33395	-0.745832	-5.82126	-5.67092	-6.26018	>tr|B7NZA0|B7NZA0_RABIT Serine proteinase inhibitor, clade B, member 10 (Predicted) OS=Oryctolagus cuniculus OX=9986 GN=SERPINB10 PE=3 SV=1
1	R.HN[+1913.677]FSHC[+57.021]C[+57.021]SK.V-NeuAc(1)Hex(5)HexNAc(4)	-6.42165	-0.784926	-6.10579	-6.36915	-6.20416	>tr|A0A5F9DE89|A0A5F9DE89_RABIT Afamin OS=Oryctolagus cuniculus OX=9986 GN=AFM PE=4 SV=1
1	R.HN[+1914.697]FSHC[+57.021]C[+57.021]SK.V-Fuc(2)Hex(5)HexNAc(4)	-5.92438	-0.745832	-5.81563	-5.49026	-5.53472	>tr|A0A5F9DE89|A0A5F9DE89_RABIT Afamin OS=Oryctolagus cuniculus OX=9986 GN=AFM PE=4 SV=1
1	R.HN[+2204.772]QSC[+57.021]EQC[+57.021]QTLAVR.S-NeuAc(2)Hex(5)HexNAc(4)	-5.7397	-0.0720599	-5.94016	-5.65309	-5.78203	>tr|A0A5F9DNQ4|A0A5F9DNQ4_RABIT Coagulation factor XII OS=Oryctolagus cuniculus OX=9986 GN=F12 PE=4 SV=1
1	R.HN[+2278.809]K.T-NeuAc(1)Hex(6)HexNAc(5)	-5.78397	-0.745832	-5.94654	-6.16042	-7.03515	>tr|B7NZA0|B7NZA0_RABIT Serine proteinase inhibitor, clade B, member 10 (Predicted) OS=Oryctolagus cuniculus OX=9986 GN=SERPINB10 PE=3 SV=1
1	R.HN[+876.322]K.T-Fuc(1)Hex(2)HexNAc(2)	-6.04739	-0.435018	-5.82781	-5.98152	-5.93306	>tr|B7NZA0|B7NZA0_RABIT Serine proteinase inhibitor, clade B, member 10 (Predicted) OS=Oryctolagus cuniculus OX=9986 GN=SERPINB10 PE=3 SV=1
1	R.HN[+917.349]K.T-Fuc(1)Hex(1)HexNAc(3)	-6.20445	-0.745832	-5.59927	-5.82979	-5.20025	>tr|B7NZA0|B7NZA0_RABIT Serine proteinase inhibitor, clade B, member 10 (Predicted) OS=Oryctolagus cuniculus OX=9986 GN=SERPINB10 PE=3 SV=1
1	R.HRPFGTN[+1548.545]ETHR.F-NeuAc(1)Hex(4)HexNAc(3)	-6.36603	-0.435018	-6.13845	-5.84027	-6.11397	>tr|G1U754|G1U754_RABIT Histidine-rich glycoprotein OS=Oryctolagus cuniculus OX=9986 GN=HRG PE=4 SV=3
1	R.HRPFGTN[+1751.624]ETHR.F-NeuAc(1)Hex(4)HexNAc(4)	-6.2246	-0.435018	-6.62492	-5.86039	-6.03717	>tr|G1U754|G1U754_RABIT Histidine-rich glycoprotein OS=Oryctolagus cuniculus OX=9986 GN=HRG PE=4 SV=3
1	R.HYTN[+1914.697]LTSGIYR.F-Fuc(2)Hex(5)HexNAc(4)	-6.2695	-0.745832	-5.5792	-5.86895	-5.57878	>tr|A0A5F9CXM9|A0A5F9CXM9_RABIT Peptidase M20 domain containing 1 OS=Oryctolagus cuniculus OX=9986 GN=PM20D1 PE=4 SV=1
1	R.HYYIAAEETIWDYAPSGVDTFTHEN[+2247.840]LTAPGSASEVFFEQGPTR.I-Fuc(4)Hex(4)HexNAc(5)	-5.97201	-0.784926	-5.67122	-5.90578	-6.2408	>tr|G1SJX3|G1SJX3_RABIT Ceruloplasmin OS=Oryctolagus cuniculus OX=9986 GN=CP PE=3 SV=1
1	R.IAN[+2133.772]FSR.S-Fuc(1)Hex(6)HexNAc(5)	-5.97003	-0.435018	-5.90686	-6.20665	-6.22674	>tr|A0A5F9CIL7|A0A5F9CIL7_RABIT Senataxin OS=Oryctolagus cuniculus OX=9986 GN=SETX PE=4 SV=1
1	R.IAN[+2424.867]FSR.S-NeuAc(1)Fuc(1)Hex(6)HexNAc(5)	-5.77891	1.09100632500697	-5.85182	-5.87273	-5.67256	>tr|A0A5F9CIL7|A0A5F9CIL7_RABIT Senataxin OS=Oryctolagus cuniculus OX=9986 GN=SETX PE=4 SV=1
1	R.IAPSLAEFALSLYREVAHESN[+1913.677]TTNIFFSPVSIALAFAMLSLGAK.G-NeuAc(1)Hex(5)HexNAc(4)	-5.53594	-0.435018	-6.42354	-5.58854	-6.45794	>tr|G1TGM8|G1TGM8_RABIT SERPIN domain-containing protein OS=Oryctolagus cuniculus OX=9986 GN=SERPINA1 PE=3 SV=1
1	R.IAPSLVEFALSLYREVARESN[+2553.910]TTNIFFSPVSIALAFAMLSLGAK.G-NeuAc(2)Fuc(1)Hex(5)HexNAc(5)	-6.23019	-0.745832	-5.87783	-6.62707	-6.51216	>tr|Q28666|Q28666_RABIT Alpha-1-antitrypsin OS=Oryctolagus cuniculus OX=9986 PE=2 SV=1
1	R.IDGAQNFN[+1751.624]ETWENYK.H-NeuAc(1)Hex(4)HexNAc(4)	-6.27446	-0.435018	-6.10963	-6.26194	-5.9219	>tr|G1SEB2|G1SEB2_RABIT Angiopoietin like 3 OS=Oryctolagus cuniculus OX=9986 GN=ANGPTL3 PE=4 SV=1
1	R.IDGAQNFN[+1913.677]ETWENYK.H-NeuAc(1)Hex(5)HexNAc(4)	-5.88903	-0.435018	-5.83825	-6.08466	-5.66837	>tr|G1SEB2|G1SEB2_RABIT Angiopoietin like 3 OS=Oryctolagus cuniculus OX=9986 GN=ANGPTL3 PE=4 SV=1
1	R.IDGAQNFN[+1914.697]ETWENYK.H-Fuc(2)Hex(5)HexNAc(4)	-6.44031	-0.784926	-6.24257	-6.15227	-5.91943	>tr|G1SEB2|G1SEB2_RABIT Angiopoietin like 3 OS=Oryctolagus cuniculus OX=9986 GN=ANGPTL3 PE=4 SV=1
1	R.IDQDN[+2204.772]SSFDSLSPESK.S-NeuAc(2)Hex(5)HexNAc(4)	-6.20021	-0.784926	-6.30334	-5.86761	-5.53051	>tr|G1SEB2|G1SEB2_RABIT Angiopoietin like 3 OS=Oryctolagus cuniculus OX=9986 GN=ANGPTL3 PE=4 SV=1
1	R.IHILPSMNPDGYEVAAAQGPN[+2206.813]MSGYLVGR.N-Fuc(4)Hex(5)HexNAc(4)	-5.96315	-0.435018	-5.94846	-5.74263	-5.96142	>tr|G1SH58|G1SH58_RABIT Carboxypeptidase N subunit 1 OS=Oryctolagus cuniculus OX=9986 GN=CPN1 PE=3 SV=2
1	R.ITSTPLSARKISSATN[+2715.963]QTTSR.N-NeuAc(2)Fuc(1)Hex(6)HexNAc(5)	-5.77745	-0.435018	-5.61224	-6.24443	-6.01019	>tr|A0A4Z2DIC3|A0A4Z2DIC3_SCHJA Phosphatidylinositol-binding clathrin assembly protein (Fragment) OS=Schistosoma japonicum OX=6182 GN=EWB00_000622 PE=3 SV=1
1	R.IVSVDVNFHPVN[+1971.719]ETVSLITNPK.K-Fuc(1)Hex(5)HexNAc(5)	-5.58711	-0.765241	-6.06372	-6.14324	-5.98524	>tr|A0A5F9C1C5|A0A5F9C1C5_RABIT Uncharacterized protein OS=Oryctolagus cuniculus OX=9986 PE=3 SV=1
1	R.KAFITN[+2133.772]FSMTIDGVTYPGK.V-Fuc(1)Hex(6)HexNAc(5)	-6.83879	-0.784926	-5.72905	-5.09099	-5.65595	>tr|G1TY29|G1TY29_RABIT Uncharacterized protein OS=Oryctolagus cuniculus OX=9986 GN=ITIH4 PE=4 SV=2
1	R.KAFITN[+2204.772]FSMTIDGVTYPGK.V-NeuAc(2)Hex(5)HexNAc(4)	-5.92993	0.260212442076787	-6.03905	-6.3943	-5.85854	>tr|G1TY29|G1TY29_RABIT Uncharacterized protein OS=Oryctolagus cuniculus OX=9986 GN=ITIH4 PE=4 SV=2
1	R.KAFITN[+2206.813]FSMTIDGVTYPGK.V-Fuc(4)Hex(5)HexNAc(4)	-6.08071	-0.745832	-6.01821	-6.00623	-5.94025	>tr|G1TY29|G1TY29_RABIT Uncharacterized protein OS=Oryctolagus cuniculus OX=9986 GN=ITIH4 PE=4 SV=2
1	R.KC[+57.021]SN[+2076.750]C[+57.021]SETAVDGQLVVMYDVNR.E-Fuc(2)Hex(6)HexNAc(4)	-6.19756	-0.745832	-5.7036	-6.16599	-5.76787	>tr|A0A5F9CLB6|A0A5F9CLB6_RABIT Inter-alpha-trypsin inhibitor heavy chain 2 OS=Oryctolagus cuniculus OX=9986 GN=ITIH2 PE=3 SV=1
1	R.KC[+57.021]SN[+2204.772]C[+57.021]SETAVDGQLVVMYDVNR.E-NeuAc(2)Hex(5)HexNAc(4)	-5.981	-0.745832	-5.34004	-5.69189	-6.56569	>tr|A0A5F9CLB6|A0A5F9CLB6_RABIT Inter-alpha-trypsin inhibitor heavy chain 2 OS=Oryctolagus cuniculus OX=9986 GN=ITIH2 PE=3 SV=1
1	R.KC[+57.021]SN[+2206.813]C[+57.021]SETAVDGQLVVMYDVNR.E-Fuc(4)Hex(5)HexNAc(4)	-5.98366	-0.784926	-5.82295	-5.93446	-6.14729	>tr|A0A5F9CLB6|A0A5F9CLB6_RABIT Inter-alpha-trypsin inhibitor heavy chain 2 OS=Oryctolagus cuniculus OX=9986 GN=ITIH2 PE=3 SV=1
1	R.KEVELVIQVPPRN[+1054.370]TTISIYPSSNVK.E-Hex(4)HexNAc(2)	-5.9259	-0.435018	-6.13585	-6.00742	-6.43146	>tr|A0A5F9CF37|A0A5F9CF37_RABIT Uncharacterized protein OS=Oryctolagus cuniculus OX=9986 GN=VCAM1 PE=4 SV=1
1	R.KGWLKVDDHQN[+2861.000]K.S-NeuAc(3)Hex(6)HexNAc(5)	-6.16058	-0.435018	-5.91774	-6.12987	-6.59148	>tr|G1U0E3|G1U0E3_RABIT Uncharacterized protein OS=Oryctolagus cuniculus OX=9986 PE=4 SV=3
1	R.KN[+3372.190]QTR.E-NeuAc(3)Fuc(1)Hex(7)HexNAc(6)	-5.58369	-0.745832	-6.12473	-6.12865	-6.12358	>tr|U3KPG6|U3KPG6_RABIT Intercellular adhesion molecule 1 OS=Oryctolagus cuniculus OX=9986 GN=ICAM1 PE=3 SV=1
1	R.KSC[+57.021]HPAVGTSAGWNIPMGLIYN[+2204.772]QTGSC[+57.021]K.L-NeuAc(2)Hex(5)HexNAc(4)	-5.55089	-0.745832	-6.16645	-6.14556	-5.6589	>tr|G1TKE4|G1TKE4_RABIT Uncharacterized protein OS=Oryctolagus cuniculus OX=9986 PE=3 SV=1
1	R.LDSFAN[+3007.058]YSHC[+57.021]GDC[+57.021]GEGAADK.T-NeuAc(3)Fuc(1)Hex(6)HexNAc(5)	-5.43891	-0.435018	-5.85322	-5.66784	-6.48424	>tr|G1SYK4|G1SYK4_RABIT Uncharacterized protein OS=Oryctolagus cuniculus OX=9986 PE=4 SV=2
1	R.LGMYVMFHC[+57.021]STLASTVVLMDYKGN[+2204.772]ATALFLLPDEGK.L-NeuAc(2)Hex(5)HexNAc(4)	-5.70798	0.527265140466286	-6.07041	-6.45288	-6.23333	>tr|Q28666|Q28666_RABIT Alpha-1-antitrypsin OS=Oryctolagus cuniculus OX=9986 PE=2 SV=1
1	R.LIHFSDKDVIN[+2204.772]ETC[+57.021]FPEDQR.V-NeuAc(2)Hex(5)HexNAc(4)	-6.08538	-0.191466	-5.81661	-5.65027	-6.31669	>tr|A0A5F9DJY7|A0A5F9DJY7_RABIT Proprotein convertase 9 OS=Oryctolagus cuniculus OX=9986 GN=PCSK9 PE=3 SV=1
1	R.LIYN[+2861.000]NTSR.A-NeuAc(3)Hex(6)HexNAc(5)	-6.17671	-0.745832	-6.32781	-5.90886	-5.51736	>tr|G1SVB3|G1SVB3_RABIT Phospholipase A2 group XV OS=Oryctolagus cuniculus OX=9986 GN=PLA2G15 PE=3 SV=1
1	R.LIYNN[+1872.651]TSR.A-NeuAc(1)Hex(6)HexNAc(3)	-6.13318	-0.435018	-6.2421	-5.62187	-5.90092	>tr|G1SVB3|G1SVB3_RABIT Phospholipase A2 group XV OS=Oryctolagus cuniculus OX=9986 GN=PLA2G15 PE=3 SV=1
1	R.LLDAAIQHN[+1913.677]ATQNYLQENLR.D-NeuAc(1)Hex(5)HexNAc(4)	-5.77248	0.527265140466286	-6.09448	-6.09863	-6.27524	>tr|G1TZC1|G1TZC1_RABIT Uncharacterized protein OS=Oryctolagus cuniculus OX=9986 PE=4 SV=2
1	R.LLLQEVVLPEIPGN[+2204.772]YSTTVSGAGC[+57.021]VYLQTSLR.Y-NeuAc(2)Hex(5)HexNAc(4)	-5.8381	-0.745832	-5.31788	-6.16166	-5.85512	>tr|G1U6R8|G1U6R8_RABIT Uncharacterized protein OS=Oryctolagus cuniculus OX=9986 PE=3 SV=2
1	R.LLSPPGAEASFELRAVSVVDSAN[+2278.809]YSC[+57.021]VYVDPAPPFAGSVASEPLELR.V-NeuAc(1)Hex(6)HexNAc(5)	-5.96035	-0.745832	-6.13013	-6.18737	-6.1863	>tr|G1SYM4|G1SYM4_RABIT Alpha-1B-glycoprotein OS=Oryctolagus cuniculus OX=9986 GN=A1BG PE=4 SV=2
1	R.LMSTEASQN[+1864.634]ITYHC[+57.021]K.N-Hex(9)HexNAc(2)	-5.87621	-0.646255	-6.26541	-6.10906	-6.37263	>tr|Q6GVI2|Q6GVI2_RABIT Prepro-alpha-1 collagen type I (Fragment) OS=Oryctolagus cuniculus OX=9986 PE=2 SV=1
1	R.LMSTEASQN[+1872.651]ITYHC[+57.021]K.N-NeuAc(1)Hex(6)HexNAc(3)	-6.12108	0.215612243450288	-5.74205	-5.99121	-5.87876	>tr|Q6GVI2|Q6GVI2_RABIT Prepro-alpha-1 collagen type I (Fragment) OS=Oryctolagus cuniculus OX=9986 PE=2 SV=1
1	R.LNDFN[+1216.423]C[+57.021]TTSSVSSALANTK.D-Hex(5)HexNAc(2)	-5.50429	0.527265140466286	-5.49295	-5.30756	-5.91626	>tr|G1U754|G1U754_RABIT Histidine-rich glycoprotein OS=Oryctolagus cuniculus OX=9986 GN=HRG PE=4 SV=3
1	R.LNDFN[+1710.598]C[+57.021]TTSSVSSALANTK.D-NeuAc(1)Hex(5)HexNAc(3)	-0.563901	0.196143475982252	-6.10032	-0.79502	-5.70301	>tr|G1U754|G1U754_RABIT Histidine-rich glycoprotein OS=Oryctolagus cuniculus OX=9986 GN=HRG PE=4 SV=3
1	R.LNDFN[+1971.719]C[+57.021]TTSSVSSALANTK.D-Fuc(1)Hex(5)HexNAc(5)	-5.74499	-0.784926	-6.07432	-6.51749	-5.85514	>tr|G1U754|G1U754_RABIT Histidine-rich glycoprotein OS=Oryctolagus cuniculus OX=9986 GN=HRG PE=4 SV=3
1	R.LNDFN[+2206.813]C[+57.021]TTSSVSSALANTK.D-Fuc(4)Hex(5)HexNAc(4)	-5.73193	0.0313484800569794	-5.7186	-6.38546	-5.85591	>tr|G1U754|G1U754_RABIT Histidine-rich glycoprotein OS=Oryctolagus cuniculus OX=9986 GN=HRG PE=4 SV=3
1	R.LPGNYHFQFDVELQHC[+57.021]N[+1540.529]VTVWLK.K-Hex(7)HexNAc(2)	-6.05459	-0.784926	-6.08407	-6.4518	-6.71103	>tr|G1TZA1|G1TZA1_RABIT C1q domain-containing protein OS=Oryctolagus cuniculus OX=9986 PE=4 SV=2
1	R.LPGNYHFQFDVELQHC[+57.021]N[+2204.772]VTVWLK.K-NeuAc(2)Hex(5)HexNAc(4)	-6.03104	-0.784926	-5.93152	-5.36631	-6.17376	>tr|G1TZA1|G1TZA1_RABIT C1q domain-containing protein OS=Oryctolagus cuniculus OX=9986 PE=4 SV=2
1	R.LVQLDYVGN[+2204.772]GTAFFILPDK.G-NeuAc(2)Hex(5)HexNAc(4)	-6.07056	1.4740101436146	-5.49717	-5.89788	-6.06319	>sp|P23775|CBG_RABIT Corticosteroid-binding globulin OS=Oryctolagus cuniculus OX=9986 GN=SERPINA6 PE=1 SV=1
1	R.LVQLDYVGN[+2206.813]GTAFFILPDK.G-Fuc(4)Hex(5)HexNAc(4)	-6.0565	0.215612243450288	-6.02582	-6.59686	-5.77092	>sp|P23775|CBG_RABIT Corticosteroid-binding globulin OS=Oryctolagus cuniculus OX=9986 GN=SERPINA6 PE=1 SV=1
1	R.N[+1389.492]C[+57.021]SR.S-Pent(1)Hex(4)HexNAc(3)	-6.07161	-0.745832	-6.21879	-6.43108	-6.19254	>tr|G1U754|G1U754_RABIT Histidine-rich glycoprotein OS=Oryctolagus cuniculus OX=9986 GN=HRG PE=4 SV=3
1	R.N[+1389.492]ISEGFSGIPDNVDAAFALPAHSYSGR.E-Pent(1)Hex(4)HexNAc(3)	-6.13859	-0.435018	-6.45119	-5.80755	-6.15841	>tr|G1U415|G1U415_RABIT Vitronectin OS=Oryctolagus cuniculus OX=9986 GN=VTN PE=4 SV=1
1	R.N[+1751.624]HTHPLKPEIQPFPQVASER.C-NeuAc(1)Hex(4)HexNAc(4)	-5.96338	1.09100632500697	-5.51469	-5.52741	-5.58944	>tr|G1U754|G1U754_RABIT Histidine-rich glycoprotein OS=Oryctolagus cuniculus OX=9986 GN=HRG PE=4 SV=3
1	R.N[+1768.640]YTLTGMDSC[+57.021]AVPAAVQK.A-Fuc(1)Hex(5)HexNAc(4)	-5.67238	-0.435018	-5.64464	-5.20548	-6.13996	>tr|A0A5F9DPA2|A0A5F9DPA2_RABIT Caspase recruitment domain family member 6 OS=Oryctolagus cuniculus OX=9986 GN=CARD6 PE=3 SV=1
1	R.N[+1897.682]LSLDYSFVTPLTSMVITKPEGQGQAQVAEKPSQDDK.H-NeuAc(1)Fuc(1)Hex(4)HexNAc(4)	-5.6064	0.215612243450288	-6.13673	-6.25376	-6.23732	>tr|Q9GLY4|Q9GLY4_RABIT Inter-alpha-trypsin inhibitor heavy chain4 OS=Oryctolagus cuniculus OX=9986 GN=ITI-HC4 PE=2 SV=1
1	R.N[+1954.704]HTHPLKPEIQPFPQVASER.C-NeuAc(1)Hex(4)HexNAc(5)	-5.82371	-0.435018	-6.28716	-6.05863	-6.04677	>tr|G1U754|G1U754_RABIT Histidine-rich glycoprotein OS=Oryctolagus cuniculus OX=9986 GN=HRG PE=4 SV=3
1	R.N[+1971.719]HTHPLKPEIQPFPQVASER.C-Fuc(1)Hex(5)HexNAc(5)	-6.04749	-0.745832	-5.87441	-5.91942	-6.26752	>tr|G1U754|G1U754_RABIT Histidine-rich glycoprotein OS=Oryctolagus cuniculus OX=9986 GN=HRG PE=4 SV=3
1	R.N[+2059.735]HTHPLKPEIQPFPQVASER.C-NeuAc(1)Fuc(1)Hex(5)HexNAc(4)	-6.08763	-0.784926	-6.03215	-5.92668	-5.88883	>tr|G1U754|G1U754_RABIT Histidine-rich glycoprotein OS=Oryctolagus cuniculus OX=9986 GN=HRG PE=4 SV=3
1	R.N[+2059.735]YTLTGMDSC[+57.021]AVPAAVQK.A-NeuAc(1)Fuc(1)Hex(5)HexNAc(4)	-6.6415	-0.599015	-6.08968	-5.96838	-5.99702	>tr|A0A5F9DPA2|A0A5F9DPA2_RABIT Caspase recruitment domain family member 6 OS=Oryctolagus cuniculus OX=9986 GN=CARD6 PE=3 SV=1
1	R.N[+2076.750]FTVEK.M-Fuc(2)Hex(6)HexNAc(4)	-6.00675	-0.745832	-5.9236	-6.29729	-5.93416	>tr|A0A5F9C3B7|A0A5F9C3B7_RABIT Metavinculin OS=Oryctolagus cuniculus OX=9986 GN=VCL PE=3 SV=1
1	R.N[+2190.793]MTAR.C-Hex(6)HexNAc(6)	-5.85763	-0.745832	-6.66392	-5.73384	-5.96998	>tr|G1T1Z5|G1T1Z5_RABIT Extracellular matrix protein 1 OS=Oryctolagus cuniculus OX=9986 GN=ECM1 PE=4 SV=3
1	R.N[+2204.772]ATALYHVEAFK.T-NeuAc(2)Hex(5)HexNAc(4)	-6.1022	-0.765241	-5.17891	-6.11329	-5.3994	>tr|G1SIL2|G1SIL2_RABIT 2,3-bisphosphoglycerate 3-phosphatase OS=Oryctolagus cuniculus OX=9986 GN=PAPSS2 PE=3 SV=2
1	R.N[+2204.772]FSESTLATIR.F-NeuAc(2)Hex(5)HexNAc(4)	-5.98512	-0.784926	-6.45571	-6.51727	-6.16171	>sp|P98139|FA7_RABIT Coagulation factor VII OS=Oryctolagus cuniculus OX=9986 GN=F7 PE=2 SV=2
1	R.N[+2206.813]HTHPLKPEIQPFPQVASER.C-Fuc(4)Hex(5)HexNAc(4)	-0.778432	-0.435018	-6.11376	-0.835796	-6.0496	>tr|G1U754|G1U754_RABIT Histidine-rich glycoprotein OS=Oryctolagus cuniculus OX=9986 GN=HRG PE=4 SV=3
1	R.N[+2245.799]ISEGFSGIPDNVDAAFALPAHSYSGR.E-NeuAc(2)Hex(4)HexNAc(5)	-6.29695	-0.745832	-6.48611	-6.08293	-5.49733	>tr|G1U415|G1U415_RABIT Vitronectin OS=Oryctolagus cuniculus OX=9986 GN=VTN PE=4 SV=1
1	R.N[+2245.799]KTLLR.Q-NeuAc(2)Hex(4)HexNAc(5)	-6.13813	-0.745832	-6.02724	-6.11876	-6.06926	>tr|A0A4Z2DLE9|A0A4Z2DLE9_SCHJA Kinesin-like protein OS=Schistosoma japonicum OX=6182 GN=EWB00_011339 PE=3 SV=1
1	R.N[+2247.840]HTHPLK.P-Fuc(4)Hex(4)HexNAc(5)	-5.9287	-0.784926	-6.21996	-5.82453	-5.9137	>tr|G1U754|G1U754_RABIT Histidine-rich glycoprotein OS=Oryctolagus cuniculus OX=9986 GN=HRG PE=4 SV=3
1	R.N[+2279.830]KTLLR.Q-Fuc(2)Hex(6)HexNAc(5)	-6.09363	-0.745832	-5.96194	-6.07774	-6.61516	>tr|A0A4Z2DLE9|A0A4Z2DLE9_SCHJA Kinesin-like protein OS=Schistosoma japonicum OX=6182 GN=EWB00_011339 PE=3 SV=1
1	R.N[+2569.905]LSC[+57.021]VVLR.L-NeuAc(2)Hex(6)HexNAc(5)	-5.64842	-0.599015	-5.97676	-6.05748	-6.59521	>tr|G1SQG6|G1SQG6_RABIT SERPIN domain-containing protein OS=Oryctolagus cuniculus OX=9986 PE=3 SV=3
1	R.N[+2717.978]C[+57.021]SR.S-Hex(8)HexNAc(7)	-6.01058	-0.581775	-6.24106	-6.02314	-5.49042	>tr|G1U754|G1U754_RABIT Histidine-rich glycoprotein OS=Oryctolagus cuniculus OX=9986 GN=HRG PE=4 SV=3
1	R.N[+2861.000]FTLLDPK.P-NeuAc(3)Hex(6)HexNAc(5)	-6.44657	-0.745832	-5.81711	-6.20976	-6.56625	>tr|G1STA7|G1STA7_RABIT Peptidoglycan recognition protein 2 OS=Oryctolagus cuniculus OX=9986 GN=PGLYRP2 PE=3 SV=2
1	R.N[+2861.000]ISEGFSGIPDNVDAAFALPAHSYSGR.E-NeuAc(3)Hex(6)HexNAc(5)	0.860126423381199	1.75026992313065	0.635181407739946	-0.163202	0.943395056186708	>tr|G1U415|G1U415_RABIT Vitronectin OS=Oryctolagus cuniculus OX=9986 GN=VTN PE=4 SV=1
1	R.N[+2861.000]TTPNFVR.C-NeuAc(3)Hex(6)HexNAc(5)	-6.3622	-0.784926	-6.52708	-5.86341	-6.37818	>tr|G1U469|G1U469_RABIT Myosin-11 OS=Oryctolagus cuniculus OX=9986 GN=MYH11 PE=3 SV=2
1	R.N[+3007.058]FTLLDPK.P-NeuAc(3)Fuc(1)Hex(6)HexNAc(5)	-5.99476	-0.435018	-6.01471	-5.92505	-5.98217	>tr|G1STA7|G1STA7_RABIT Peptidoglycan recognition protein 2 OS=Oryctolagus cuniculus OX=9986 GN=PGLYRP2 PE=3 SV=2
1	R.N[+3007.058]HTHPLK.P-NeuAc(3)Fuc(1)Hex(6)HexNAc(5)	-5.89674	-0.435018	-5.90544	-6.14509	-6.08147	>tr|G1U754|G1U754_RABIT Histidine-rich glycoprotein OS=Oryctolagus cuniculus OX=9986 GN=HRG PE=4 SV=3
1	R.N[+3007.058]YSKR.N-NeuAc(3)Fuc(1)Hex(6)HexNAc(5)	-6.05322	-0.745832	-6.19978	-5.98853	-6.06359	>tr|A0A4Z2CMQ9|A0A4Z2CMQ9_SCHJA SH3 and multiple ankyrin repeat-containing protein OS=Schistosoma japonicum OX=6182 GN=EWB00_009240 PE=4 SV=1
1	R.N[+3372.190]KTLLR.Q-NeuAc(3)Fuc(1)Hex(7)HexNAc(6)	-5.90972	0.215612243450288	-5.43544	-5.78654	-6.4774	>tr|A0A4Z2DLE9|A0A4Z2DLE9_SCHJA Kinesin-like protein OS=Schistosoma japonicum OX=6182 GN=EWB00_011339 PE=3 SV=1
1	R.N[+3517.228]ISEGFSGIPDNVDAAFALPAHSYSGR.E-NeuAc(4)Hex(7)HexNAc(6)	-5.87758	-0.765241	-5.96	-5.91533	-6.19144	>tr|G1U415|G1U415_RABIT Vitronectin OS=Oryctolagus cuniculus OX=9986 GN=VTN PE=4 SV=1
1	R.N[+3517.228]KTLLR.Q-NeuAc(4)Hex(7)HexNAc(6)	-5.77205	0.215612243450288	-6.45751	-5.81998	-5.71516	>tr|A0A4Z2DLE9|A0A4Z2DLE9_SCHJA Kinesin-like protein OS=Schistosoma japonicum OX=6182 GN=EWB00_011339 PE=3 SV=1
1	R.NALGHLPPTVFSALGN[+2204.772]LTFLNLQGNTLR.T-NeuAc(2)Hex(5)HexNAc(4)	-5.96968	-0.1967	-6.23404	-5.57073	-6.83924	>tr|U3KPI5|U3KPI5_RABIT Carboxypeptidase N subunit 2 OS=Oryctolagus cuniculus OX=9986 GN=CPN2 PE=4 SV=1
1	R.NC[+57.021]GVN[+2204.772]C[+57.021]SGDVFTTLIGEITSPNYPR.P-NeuAc(2)Hex(5)HexNAc(4)	-6.1583	-0.435018	-6.42767	-6.22783	-6.10383	>tr|G1T7G7|G1T7G7_RABIT Complement C1s OS=Oryctolagus cuniculus OX=9986 GN=C1S PE=4 SV=2
1	R.NC[+57.021]N[+1914.697]DSDVLSVSGFALQDINR.D-Fuc(2)Hex(5)HexNAc(4)	-6.04196	-0.209757	-5.97029	-6.08275	-6.21665	>tr|G1SEK8|G1SEK8_RABIT Fetuin B OS=Oryctolagus cuniculus OX=9986 GN=FETUB PE=4 SV=2
1	R.NC[+57.021]N[+730.264]DSDVLSVSGFALQDINR.D-Hex(2)HexNAc(2)	-6.47682	-0.784926	-5.66234	-6.09572	-5.51185	>tr|G1SEK8|G1SEK8_RABIT Fetuin B OS=Oryctolagus cuniculus OX=9986 GN=FETUB PE=4 SV=2
1	R.NGVQQQEFWLEGVEQTQNSLFRVEGDNNWILANLN[+4028.418]VTGYYQVNYDEGNWK.K-NeuAc(4)Fuc(1)Hex(8)HexNAc(7)	-5.62977	-0.435018	-5.97526	-5.8872	-6.26221	>tr|G1TE56|G1TE56_RABIT Aminopeptidase N OS=Oryctolagus cuniculus OX=9986 GN=ANPEP PE=3 SV=3
1	R.NNQIDRIDEKAFEN[+1872.651]VTDLQWLILDHNLLENSK.I-NeuAc(1)Hex(6)HexNAc(3)	-5.38509	-0.745832	-6.08879	-5.6068	-6.0432	>tr|G1SP97|G1SP97_RABIT Lumican OS=Oryctolagus cuniculus OX=9986 GN=LUM PE=3 SV=1
1	R.NVILFSVFDEN[+3517.228]QSWYLTENMQR.F-NeuAc(4)Hex(7)HexNAc(6)	-5.69003	-0.435018	-6.25439	-6.17709	-6.25406	>tr|A0A5F9DUT3|A0A5F9DUT3_RABIT Uncharacterized protein OS=Oryctolagus cuniculus OX=9986 PE=3 SV=1
1	R.PALLGSAENFTVLIKNNIDFPGHN[+2204.772]YTTR.N-NeuAc(2)Hex(5)HexNAc(4)	-5.71342	-0.435018	-6.0981	-5.99266	-6.04611	>tr|A0A5F9CKV3|A0A5F9CKV3_RABIT P2X purinoceptor OS=Oryctolagus cuniculus OX=9986 GN=P2RX7 PE=3 SV=1
1	R.PFGTN[+2553.910]ETHR.F-NeuAc(2)Fuc(1)Hex(5)HexNAc(5)	-5.70031	-0.581775	-5.82169	-6.2546	-6.30291	>tr|G1U754|G1U754_RABIT Histidine-rich glycoprotein OS=Oryctolagus cuniculus OX=9986 GN=HRG PE=4 SV=3
1	R.PHTAVDSELPPN[+2100.761]VSVFIPPR.D-NeuAc(1)Fuc(1)Hex(4)HexNAc(5)	0.294250018604829	0.593835682610055	0.37494182555044	0.262435625419381	0.23474581120806	>tr|G1TK85|G1TK85_RABIT Immunoglobulin heavy constant mu OS=Oryctolagus cuniculus OX=9986 GN=IGHM PE=4 SV=2
1	R.PLFEHFKN[+1548.545]ITNDWTR.R-NeuAc(1)Hex(4)HexNAc(3)	-6.0634	-0.784926	-6.11906	-5.84798	-5.59251	>sp|P15541|AMPN_RABIT Aminopeptidase N OS=Oryctolagus cuniculus OX=9986 GN=ANPEP PE=1 SV=4
1	R.PLFEHFKN[+4028.418]ITNDWTR.R-NeuAc(4)Fuc(1)Hex(8)HexNAc(7)	-6.16533	-0.784926	-5.7722	-6.3141	-5.8217	>sp|P15541|AMPN_RABIT Aminopeptidase N OS=Oryctolagus cuniculus OX=9986 GN=ANPEP PE=1 SV=4
1	R.PPLREQQFN[+1378.476]STIRVVSTLPIAHQDWLR.G-Hex(6)HexNAc(2)	-6.43356	-0.581775	-5.25661	-5.39037	-6.19072	>tr|G1THZ6|G1THZ6_RABIT Immunoglobulin heavy constant mu OS=Oryctolagus cuniculus OX=9986 GN=IGHM PE=4 SV=3
1	R.PSGFGLTLSGVIAFIPNGIFDIN[+1378.476]ISPNSQDK.Q-Hex(6)HexNAc(2)	-6.16955	-0.745832	-6.01199	-5.80878	-6.53056	>tr|A0A4Z2CUB8|A0A4Z2CUB8_SCHJA Membrane-associated guanylate kinase, WW and PDZ domain-containing protein isoform 2 OS=Schistosoma japonicum OX=6182 GN=EWB00_007472 PE=4 SV=1
1	R.PTGEVYELEIDTLETTC[+57.021]HALDPTPLAN[+1540.529]C[+57.021]SVR.Q-Hex(7)HexNAc(2)	-5.95223	-0.745832	-5.89051	-5.70768	-6.18644	>tr|U3KMR2|U3KMR2_RABIT Alpha-2-HS-glycoprotein OS=Oryctolagus cuniculus OX=9986 GN=AHSG PE=4 SV=1
1	R.PTLDPAWMSQANEN[+2204.772]GSDTVSIFSTSSFMK.T-NeuAc(2)Hex(5)HexNAc(4)	-5.70671	-0.745832	-6.1773	-6.07555	-6.34691	>tr|A0A4Z2CMQ9|A0A4Z2CMQ9_SCHJA SH3 and multiple ankyrin repeat-containing protein OS=Schistosoma japonicum OX=6182 GN=EWB00_009240 PE=4 SV=1
1	R.PYLQN[+2262.814]ESVK.V-NeuAc(1)Fuc(1)Hex(5)HexNAc(5)	-5.85396	-0.745832	-5.98266	-5.90792	-6.79369	>tr|A0A5F9CG95|A0A5F9CG95_RABIT Uncharacterized protein OS=Oryctolagus cuniculus OX=9986 PE=4 SV=1
1	R.PYLQN[+3663.286]ESVKVDC[+57.021]YPGYSLPNEQTEITC[+57.021]TENGWSPLPK.C-NeuAc(4)Fuc(1)Hex(7)HexNAc(6)	-5.71235	-0.784926	-6.10947	-6.54873	-6.24017	>tr|A0A5F9CG95|A0A5F9CG95_RABIT Uncharacterized protein OS=Oryctolagus cuniculus OX=9986 PE=4 SV=1
1	R.PYLTEFIHN[+1751.624]TTVNYRC[+57.021]IGTHSYMQTVC[+57.021]INGR.W-NeuAc(1)Hex(4)HexNAc(4)	-5.94666	-0.745832	-5.96404	-5.66242	-6.0638	>tr|G1SEL1|G1SEL1_RABIT Complement factor H related 5 OS=Oryctolagus cuniculus OX=9986 GN=CFHR5 PE=4 SV=2
1	R.PYLTEFIHN[+2100.761]TTVNYR.C-NeuAc(1)Fuc(1)Hex(4)HexNAc(5)	-6.634	-0.745832	-5.71699	-6.25024	-5.81361	>tr|G1SEL1|G1SEL1_RABIT Complement factor H related 5 OS=Oryctolagus cuniculus OX=9986 GN=CFHR5 PE=4 SV=2
1	R.PYLTEFIHN[+2756.989]TTVNYRC[+57.021]IGTHSYMQTVC[+57.021]INGR.W-NeuAc(2)Fuc(1)Hex(5)HexNAc(6)	-6.36561	-0.435018	-6.30858	-6.00027	-5.63481	>tr|G1SEL1|G1SEL1_RABIT Complement factor H related 5 OS=Oryctolagus cuniculus OX=9986 GN=CFHR5 PE=4 SV=2
1	R.QEPPSVTASSHMAPGQN[+1257.449]R.T-Hex(4)HexNAc(3)	-5.51364	-0.745832	-5.92359	-5.60397	-6.43816	>tr|G1TN25|G1TN25_RABIT Alpha-2-glycoprotein 1, zinc-binding OS=Oryctolagus cuniculus OX=9986 GN=AZGP1 PE=3 SV=3
1	R.QGC[+57.021]APGSQKN[+1378.476]SSLC[+57.021]ELC[+57.021]VGPSVC[+57.021]APNNR.E-Hex(6)HexNAc(2)	-5.3421	-0.435018	-5.82985	-5.77532	-6.33878	>sp|P19134|TRFE_RABIT Serotransferrin OS=Oryctolagus cuniculus OX=9986 GN=TF PE=1 SV=4
1	R.QGC[+57.021]APGSQKN[+2190.793]SSLC[+57.021]ELC[+57.021]VGPSVC[+57.021]APNNR.E-Hex(6)HexNAc(6)	-5.97122	-0.435018	-6.18287	-6.22241	-6.21083	>sp|P19134|TRFE_RABIT Serotransferrin OS=Oryctolagus cuniculus OX=9986 GN=TF PE=1 SV=4
1	R.QINEYIEN[+2204.772]K.T-NeuAc(2)Hex(5)HexNAc(4)	-0.667458	1.13381175109996	-0.28996	0.546926000553984	-0.00883865	>sp|P23775|CBG_RABIT Corticosteroid-binding globulin OS=Oryctolagus cuniculus OX=9986 GN=SERPINA6 PE=1 SV=1
1	R.QINEYIEN[+2350.830]K.T-NeuAc(2)Fuc(1)Hex(5)HexNAc(4)	-6.59787	-0.1967	-6.39648	-5.54998	-5.96705	>sp|P23775|CBG_RABIT Corticosteroid-binding globulin OS=Oryctolagus cuniculus OX=9986 GN=SERPINA6 PE=1 SV=1
1	R.QLEEFLN[+1752.645]QSSPFYFWINGDR.I-Fuc(2)Hex(4)HexNAc(4)	-6.22686	-0.435018	-6.20279	-6.40191	-6.05898	>sp|Q9XSC5|CLUS_RABIT Clusterin OS=Oryctolagus cuniculus OX=9986 GN=CLU PE=2 SV=1
1	R.QPQPVHLLPLHETEHLNMVFSN[+2204.772]QTLEHINAILLGAYR.S-NeuAc(2)Hex(5)HexNAc(4)	-5.77741	-0.784926	-5.75231	-6.34225	-6.49616	>sp|P53761|LCAT_RABIT Phosphatidylcholine-sterol acyltransferase OS=Oryctolagus cuniculus OX=9986 GN=LCAT PE=1 SV=1
1	R.QPQPVHLLPLHETEHLNMVFSN[+2206.813]QTLEHINAILLGAYR.S-Fuc(4)Hex(5)HexNAc(4)	-5.51671	-0.784926	-6.01615	-5.91157	-6.08779	>sp|P53761|LCAT_RABIT Phosphatidylcholine-sterol acyltransferase OS=Oryctolagus cuniculus OX=9986 GN=LCAT PE=1 SV=1
1	R.RLLSPPGAEASFELRAVSVVDSAN[+2100.761]YSC[+57.021]VYVDPAPPFAGSVASEPLELR.V-NeuAc(1)Fuc(1)Hex(4)HexNAc(5)	-5.61045	-0.784926	-5.94763	-5.36626	-5.91592	>tr|G1SYM4|G1SYM4_RABIT Alpha-1B-glycoprotein OS=Oryctolagus cuniculus OX=9986 GN=A1BG PE=4 SV=2
1	R.RLLSPPGAEASFELRAVSVVDSAN[+2117.777]YSC[+57.021]VYVDPAPPFAGSVASEPLELR.V-Fuc(2)Hex(5)HexNAc(5)	-6.13867	-0.784926	-6.16586	-6.24173	-6.53296	>tr|G1SYM4|G1SYM4_RABIT Alpha-1B-glycoprotein OS=Oryctolagus cuniculus OX=9986 GN=A1BG PE=4 SV=2
1	R.RPTGEVYELEIDTLETTC[+57.021]HALDPTPLAN[+1622.582]C[+57.021]SVR.Q-Hex(5)HexNAc(4)	-6.15042	0.30030119240778	-5.82977	-5.85269	-6.37826	>tr|U3KMR2|U3KMR2_RABIT Alpha-2-HS-glycoprotein OS=Oryctolagus cuniculus OX=9986 GN=AHSG PE=4 SV=1
1	R.RPTGEVYELEIDTLETTC[+57.021]HALDPTPLAN[+1954.704]C[+57.021]SVR.Q-NeuAc(1)Hex(4)HexNAc(5)	-6.76473	-0.745832	-5.79138	-5.46859	-5.87347	>tr|U3KMR2|U3KMR2_RABIT Alpha-2-HS-glycoprotein OS=Oryctolagus cuniculus OX=9986 GN=AHSG PE=4 SV=1
1	R.RPTGEVYELEIDTLETTC[+57.021]HALDPTPLAN[+2059.735]C[+57.021]SVR.Q-NeuAc(1)Fuc(1)Hex(5)HexNAc(4)	-6.00244	-0.784926	-6.02086	-5.73331	-5.49607	>tr|U3KMR2|U3KMR2_RABIT Alpha-2-HS-glycoprotein OS=Oryctolagus cuniculus OX=9986 GN=AHSG PE=4 SV=1
1	R.RPTGEVYELEIDTLETTC[+57.021]HALDPTPLAN[+2262.814]C[+57.021]SVR.Q-NeuAc(1)Fuc(1)Hex(5)HexNAc(5)	0.147260225748679	0.374397119388078	-0.361877	0.083128926802037	-0.116839	>tr|U3KMR2|U3KMR2_RABIT Alpha-2-HS-glycoprotein OS=Oryctolagus cuniculus OX=9986 GN=AHSG PE=4 SV=1
1	R.RPTGEVYELEIDTLETTC[+57.021]HALDPTPLAN[+2350.830]C[+57.021]SVR.Q-NeuAc(2)Fuc(1)Hex(5)HexNAc(4)	-5.65837	-0.280872	-5.52942	-5.92492	-5.68422	>tr|U3KMR2|U3KMR2_RABIT Alpha-2-HS-glycoprotein OS=Oryctolagus cuniculus OX=9986 GN=AHSG PE=4 SV=1
1	R.SITC[+57.021]IN[+2206.813]GTWTQLPQC[+57.021]VATDQLEK.C-Fuc(4)Hex(5)HexNAc(4)	-6.08832	-0.745832	-6.4873	-6.24216	-5.80792	>tr|A0A5F9CG95|A0A5F9CG95_RABIT Uncharacterized protein OS=Oryctolagus cuniculus OX=9986 PE=4 SV=1
1	R.SLEPTVVN[+1038.375]R.S-Fuc(1)Hex(3)HexNAc(2)	-5.99655	-0.745832	-6.49783	-5.84804	-5.68941	>sp|P98137|CO8B_RABIT Complement component C8 beta chain OS=Oryctolagus cuniculus OX=9986 GN=C8B PE=1 SV=1
1	R.SLGVHLSFIRPTELDSN[+1710.598]WSWFQLRC[+57.021]MQTAFFHQYGC[+57.021]TASDANSK.C-NeuAc(1)Hex(5)HexNAc(3)	-6.59274	-0.435018	-6.5164	-5.8162	-6.02349	>tr|A0A5F9CX54|A0A5F9CX54_RABIT Arf-GAP domain-containing protein OS=Oryctolagus cuniculus OX=9986 PE=4 SV=1
1	R.SLGVHLSFIRPTELDSN[+2553.910]WSWFQLR.C-NeuAc(2)Fuc(1)Hex(5)HexNAc(5)	-5.81631	-0.435018	-6.27723	-6.07002	-5.80053	>tr|A0A5F9CX54|A0A5F9CX54_RABIT Arf-GAP domain-containing protein OS=Oryctolagus cuniculus OX=9986 PE=4 SV=1
1	R.SLPGHSSGSQDGGVN[+1913.677]TTSGPIR.K-NeuAc(1)Hex(5)HexNAc(4)	-6.73295	-0.745832	-6.45037	-6.04507	-5.9062	>tr|A0A5F9CPI4|A0A5F9CPI4_RABIT CD44 antigen OS=Oryctolagus cuniculus OX=9986 GN=CD44 PE=4 SV=1
1	R.SLPVSDSVLGAFEQRVAQAN[+568.212]LTQDQVLFFPTYGFC[+57.021]EAADQFHILDEVR.R-Hex(1)HexNAc(2)	-5.70104	-0.745832	-5.81514	-6.19563	-5.42112	>sp|Q28679|CO8G_RABIT Complement component C8 gamma chain OS=Oryctolagus cuniculus OX=9986 GN=C8G PE=2 SV=1
1	R.SSEVVSTVVAN[+2350.830]R.S-NeuAc(2)Fuc(1)Hex(5)HexNAc(4)	-6.74579	-0.745832	-5.6013	-6.21217	-6.12537	>tr|G1SF18|G1SF18_RABIT Carboxylic ester hydrolase OS=Oryctolagus cuniculus OX=9986 PE=3 SV=1
1	R.SWPAVGN[+2262.814]C[+57.021]TSALR.W-NeuAc(1)Fuc(1)Hex(5)HexNAc(5)	-6.37281	-0.784926	-5.76066	-6.07617	-6.07558	>tr|G1TVS4|G1TVS4_RABIT Hemopexin OS=Oryctolagus cuniculus OX=9986 GN=TRIM3 PE=3 SV=2
1	R.TEVSTNHVLIYFEELTN[+1622.582]K.T-Hex(5)HexNAc(4)	-6.20035	-0.0720599	-5.62084	-5.95167	-5.75599	>tr|A0A5F9C1C5|A0A5F9C1C5_RABIT Uncharacterized protein OS=Oryctolagus cuniculus OX=9986 PE=3 SV=1
1	R.TEVSTNHVLIYFEELTN[+2247.840]K.T-Fuc(4)Hex(4)HexNAc(5)	-5.90668	-0.435018	-5.9091	-5.35048	-6.40409	>tr|A0A5F9C1C5|A0A5F9C1C5_RABIT Uncharacterized protein OS=Oryctolagus cuniculus OX=9986 PE=3 SV=1
1	R.TEVSTNHVLIYLDKVSN[+1914.697]QTLSLSFTVVQDIPVIDLKPAIVK.V-Fuc(2)Hex(5)HexNAc(4)	-5.41908	-0.745832	-5.69465	-5.99576	-5.64404	>tr|G1SQ70|G1SQ70_RABIT Alpha-2-macroglobulin OS=Oryctolagus cuniculus OX=9986 GN=A2M PE=3 SV=3
1	R.TEVSTNHVLIYLDKVSN[+1914.697]QTLSLSFTVVQEIPVIDLKPAIVK.V-Fuc(2)Hex(5)HexNAc(4)	-6.43677	-0.581775	-6.01285	-5.67437	-6.16859	>tr|A0A5F9CQC0|A0A5F9CQC0_RABIT Alpha-2-macroglobulin OS=Oryctolagus cuniculus OX=9986 GN=A2M PE=3 SV=1
1	R.TEVSTNHVLIYLDKVSN[+2204.772]QTLSLSFTVVQEIPVIDLKPAIVK.V-NeuAc(2)Hex(5)HexNAc(4)	-5.55543	-0.435018	-6.57207	-5.76882	-5.83217	>tr|A0A5F9CQC0|A0A5F9CQC0_RABIT Alpha-2-macroglobulin OS=Oryctolagus cuniculus OX=9986 GN=A2M PE=3 SV=1
1	R.TFQIHVN[+1710.598]ISYTGKRPTSNMVIVDVK.M-NeuAc(1)Hex(5)HexNAc(3)	-5.78577	-0.435018	-5.67027	-6.25763	-5.90021	>tr|A0A5F9C1C5|A0A5F9C1C5_RABIT Uncharacterized protein OS=Oryctolagus cuniculus OX=9986 PE=3 SV=1
1	R.TFQIHVN[+1914.697]ISYTGK.R-Fuc(2)Hex(5)HexNAc(4)	0.509014489707279	0.87903555764311	-0.866483	-0.835796	-0.182197	>tr|A0A5F9C1C5|A0A5F9C1C5_RABIT Uncharacterized protein OS=Oryctolagus cuniculus OX=9986 PE=3 SV=1
1	R.VDN[+1257.449]STSVSVPMLSGTGTFPHGSDAENNFSMTR.V-Hex(4)HexNAc(3)	-6.12743	-0.745832	-5.95533	-5.79613	-6.11777	>tr|G1SDD6|G1SDD6_RABIT Angiotensin 1-10 OS=Oryctolagus cuniculus OX=9986 GN=AGT PE=3 SV=3
1	R.VDN[+1694.603]R.S-NeuAc(1)Fuc(1)Hex(4)HexNAc(3)	-5.93763	-0.745832	-5.75855	-5.98681	-6.63491	>tr|G1SD43|G1SD43_RABIT Glycosyl-phosphatidylinositol-specific phospholipase D OS=Oryctolagus cuniculus OX=9986 GN=GPLD1 PE=3 SV=3
1	R.VDN[+2279.830]R.S-Fuc(2)Hex(6)HexNAc(5)	-5.95328	-0.784926	-6.15289	-5.81998	-5.72917	>tr|G1SD43|G1SD43_RABIT Glycosyl-phosphatidylinositol-specific phospholipase D OS=Oryctolagus cuniculus OX=9986 GN=GPLD1 PE=3 SV=3
1	R.VFSLN[+1914.697]K.S-Fuc(2)Hex(5)HexNAc(4)	-0.563901	-0.435018	-6.16292	-0.755305	-5.6044	>tr|A0A5F9DI97|A0A5F9DI97_RABIT Uncharacterized protein OS=Oryctolagus cuniculus OX=9986 PE=3 SV=1
1	R.VHTGN[+2262.814]VTFYMESSVAK.Q-NeuAc(1)Fuc(1)Hex(5)HexNAc(5)	-5.88897	-0.745832	-6.19509	-6.06821	-5.91016	>tr|Q9GLY4|Q9GLY4_RABIT Inter-alpha-trypsin inhibitor heavy chain4 OS=Oryctolagus cuniculus OX=9986 GN=ITI-HC4 PE=2 SV=1
1	R.VPMMSRLGMYVTLHC[+57.021]STLASTVVLMDYKGN[+2350.830]ATALFLLPDEGK.L-NeuAc(2)Fuc(1)Hex(5)HexNAc(4)	-5.74784	-0.784926	-5.6693	-6.44796	-6.06661	>tr|O62663|O62663_RABIT ATS-22 OS=Oryctolagus cuniculus OX=9986 PE=2 SV=1
1	R.VQN[+2204.772]VSVLSIC[+57.021]DFR.E-NeuAc(2)Hex(5)HexNAc(4)	-6.6659	-0.784926	-6.33555	-5.68798	-5.94313	>tr|A0A5F9D8X7|A0A5F9D8X7_RABIT Fibroblast activation protein alpha OS=Oryctolagus cuniculus OX=9986 GN=FAP PE=4 SV=1
1	R.VSFPVDSELPPN[+1914.697]VSVFIPPR.D-Fuc(2)Hex(5)HexNAc(4)	-0.629762	-0.581775	-6.06228	-0.835796	-6.66261	>sp|P03988|IGHM_RABIT Ig mu chain C region secreted form OS=Oryctolagus cuniculus OX=9986 PE=2 SV=1
1	R.VSFPVDSELPPN[+2116.756]VSVFIPPR.D-NeuAc(1)Hex(5)HexNAc(5)	-6.08957	-0.435018	-5.96771	-6.61722	-6.24353	>sp|P03988|IGHM_RABIT Ig mu chain C region secreted form OS=Oryctolagus cuniculus OX=9986 PE=2 SV=1
1	R.VTGAPLVLQVGQLQLSHN[+1913.677]LSFVILMPQSLK.H-NeuAc(1)Hex(5)HexNAc(4)	-6.12738	-0.784926	-5.77349	-6.22997	-6.40328	>tr|G1SCJ8|G1SCJ8_RABIT Plasma protease C1 inhibitor OS=Oryctolagus cuniculus OX=9986 GN=SERPING1 PE=3 SV=3
1	R.YDLFHC[+57.021]STLASTVLRMDYKGN[+4028.418]ATALFLLPDEGK.L-NeuAc(4)Fuc(1)Hex(8)HexNAc(7)	-5.95724	-0.745832	-6.32937	-6.57365	-5.84231	>tr|A0A5F9DT67|A0A5F9DT67_RABIT SERPIN domain-containing protein OS=Oryctolagus cuniculus OX=9986 GN=SERPINA1 PE=3 SV=1
1	R.YLYLASN[+1913.677]QSNK.W-NeuAc(1)Hex(5)HexNAc(4)	-0.00472454	0.527265140466286	-0.591287	-0.163202	-0.323803	>tr|A0A5F9DJG6|A0A5F9DJG6_RABIT Amine oxidase OS=Oryctolagus cuniculus OX=9986 GN=AOC3 PE=3 SV=1
1	R.YNELLQSYQWKMLN[+1227.439]TSSLLDQLNEQFNWVSQLANLTQGPDQYYLR.V-Pent(1)Hex(3)HexNAc(3)	-5.65571	-0.784926	-6.43634	-5.65223	-6.96817	>tr|G1SQ27|G1SQ27_RABIT Clusterin OS=Oryctolagus cuniculus OX=9986 GN=CLU PE=3 SV=2
1	R.YSDEYQTLRLNDFN[+2350.830]C[+57.021]TTSSVSSALANTKDSPVLFDFIEDTEPFR.K-NeuAc(2)Fuc(1)Hex(5)HexNAc(4)	-5.77525	-0.784926	-5.81893	-5.88972	-5.98823	>tr|G1U754|G1U754_RABIT Histidine-rich glycoprotein OS=Oryctolagus cuniculus OX=9986 GN=HRG PE=4 SV=3
1	R.YTYILN[+1024.359]ASEEQSPGEGDGNC[+57.021]VTR.I-Pent(1)Hex(3)HexNAc(2)	-6.42478	-0.784926	-6.4867	-6.12995	-6.2221	>tr|G1SJX3|G1SJX3_RABIT Ceruloplasmin OS=Oryctolagus cuniculus OX=9986 GN=CP PE=3 SV=1
1	R.YTYILN[+2861.000]ASEEQSPGEGDGNC[+57.021]VTR.I-NeuAc(3)Hex(6)HexNAc(5)	-6.28957	-0.745832	-5.66692	-5.55362	-5.60937	>tr|G1SJX3|G1SJX3_RABIT Ceruloplasmin OS=Oryctolagus cuniculus OX=9986 GN=CP PE=3 SV=1
1	R.YYESLAQLEEQFEAGQVNVVLIPNN[+1694.603]GTGGWWSLK.P-NeuAc(1)Fuc(1)Hex(4)HexNAc(3)	-6.04887	-0.784926	-5.88402	-6.00565	-5.83347	>tr|A0A5F9DJG6|A0A5F9DJG6_RABIT Amine oxidase OS=Oryctolagus cuniculus OX=9986 GN=AOC3 PE=3 SV=1
1	R.YYESLAQLEERFEAGQVNVVLIPNN[+2142.808]GTGGWWSLKLQVPPGLAPPLQFHPQGPR.F-Fuc(3)Hex(3)HexNAc(6)	-5.74194	-0.745832	-5.38489	-6.20924	-5.98607	>tr|A0A5F9DI44|A0A5F9DI44_RABIT Amine oxidase OS=Oryctolagus cuniculus OX=9986 GN=AOC3 PE=3 SV=1
2	K.AAVPSALSTN[+2059.735]SSR.G-NeuAc(1)Fuc(1)Hex(5)HexNAc(4)	-5.52142	-0.599015	-0.319969	-5.54759	-6.41358	>tr|G1TFU9|G1TFU9_RABIT Galectin-3-binding protein OS=Oryctolagus cuniculus OX=9986 GN=LGALS3BP PE=4 SV=2
2	K.AAVPSALSTN[+2117.777]SSR.G-Fuc(2)Hex(5)HexNAc(5)	-6.24614	-0.435018	-0.361877	-5.9979	-5.82159	>tr|G1TFU9|G1TFU9_RABIT Galectin-3-binding protein OS=Oryctolagus cuniculus OX=9986 GN=LGALS3BP PE=4 SV=2
2	K.AAVPSALSTN[+2262.814]SSR.G-NeuAc(1)Fuc(1)Hex(5)HexNAc(5)	-5.85377	-0.745832	-0.866483	-5.97394	-5.89675	>tr|G1TFU9|G1TFU9_RABIT Galectin-3-binding protein OS=Oryctolagus cuniculus OX=9986 GN=LGALS3BP PE=4 SV=2
2	K.AAVPSALSTN[+2861.000]SSR.G-NeuAc(3)Hex(6)HexNAc(5)	-5.88305	-0.599015	-0.866483	-5.72379	-6.30978	>tr|G1TFU9|G1TFU9_RABIT Galectin-3-binding protein OS=Oryctolagus cuniculus OX=9986 GN=LGALS3BP PE=4 SV=2
2	K.AEALC[+57.021]LSN[+1913.677]DTGLGLSPIASLR.A-NeuAc(1)Hex(5)HexNAc(4)	-0.663772	0.686366286057981	0.399691652823889	-0.261715	-0.157489	>tr|G1TR31|G1TR31_RABIT Uncharacterized protein OS=Oryctolagus cuniculus OX=9986 PE=3 SV=3
2	K.AEALC[+57.021]LSN[+2204.772]DTGLGLSPIASLR.A-NeuAc(2)Hex(5)HexNAc(4)	0.478750903065301	0.686366286057981	0.720095332048528	0.140106577123511	0.444711508381902	>tr|G1TR31|G1TR31_RABIT Uncharacterized protein OS=Oryctolagus cuniculus OX=9986 PE=3 SV=3
2	K.AHSTFQISMN[+1913.677]LSYTGSRPISNMVIADVK.M-NeuAc(1)Hex(5)HexNAc(4)	-6.11829	2.38344600012001	3.24540871557762	-6.18278	-5.9496	>tr|G1SQ70|G1SQ70_RABIT Alpha-2-macroglobulin OS=Oryctolagus cuniculus OX=9986 GN=A2M PE=3 SV=3
2	K.AHSTFQISMN[+1914.697]LSYTGSR.P-Fuc(2)Hex(5)HexNAc(4)	2.05161567558272	2.84799534770819	2.87002872768453	1.79858126824395	2.61230784435705	>tr|G1SQ70|G1SQ70_RABIT Alpha-2-macroglobulin OS=Oryctolagus cuniculus OX=9986 GN=A2M PE=3 SV=3
2	K.AHSTFQISMN[+1914.697]LSYTGSRPISNMVIADVK.M-Fuc(2)Hex(5)HexNAc(4)	-6.01779	-0.435018	-0.319969	-6.61475	-5.75717	>tr|G1SQ70|G1SQ70_RABIT Alpha-2-macroglobulin OS=Oryctolagus cuniculus OX=9986 GN=A2M PE=3 SV=3
2	K.AHSTFQISMN[+1971.719]LSYTGSRPISNMVIADVK.M-Fuc(1)Hex(5)HexNAc(5)	-5.77105	0.510074930441187	-0.319969	-6.29727	-5.91909	>tr|G1SQ70|G1SQ70_RABIT Alpha-2-macroglobulin OS=Oryctolagus cuniculus OX=9986 GN=A2M PE=3 SV=3
2	K.AHSTFQISMN[+2206.813]LSYTGSRPISNMVIADVK.M-Fuc(4)Hex(5)HexNAc(4)	-5.833	0.473460032546227	-0.852159	-6.0234	-6.19937	>tr|G1SQ70|G1SQ70_RABIT Alpha-2-macroglobulin OS=Oryctolagus cuniculus OX=9986 GN=A2M PE=3 SV=3
2	K.AHSTFQISMN[+2262.814]LSYTGSRPISNMVIADVK.M-NeuAc(1)Fuc(1)Hex(5)HexNAc(5)	-6.21225	-0.271699	-0.28996	-5.84824	-6.42283	>tr|G1SQ70|G1SQ70_RABIT Alpha-2-macroglobulin OS=Oryctolagus cuniculus OX=9986 GN=A2M PE=3 SV=3
2	K.AHSTFQISMN[+2278.809]LSYTGSR.P-NeuAc(1)Hex(6)HexNAc(5)	-5.89063	-0.599015	-0.189594	-5.59163	-5.51789	>tr|G1SQ70|G1SQ70_RABIT Alpha-2-macroglobulin OS=Oryctolagus cuniculus OX=9986 GN=A2M PE=3 SV=3
2	K.AQYDEKEN[+2204.772]LTVR.C-NeuAc(2)Hex(5)HexNAc(4)	-6.45707	-0.784926	-0.837983	-5.48991	-6.29089	>tr|A0A5F9CCJ6|A0A5F9CCJ6_RABIT Uncharacterized protein OS=Oryctolagus cuniculus OX=9986 PE=4 SV=1
2	K.AQYVEKEN[+2204.772]LTVR.C-NeuAc(2)Hex(5)HexNAc(4)	-6.09126	0.0884737366968349	0.702057466165696	-6.1325	-6.47198	>tr|A0A5F9CJA1|A0A5F9CJA1_RABIT Uncharacterized protein OS=Oryctolagus cuniculus OX=9986 PE=4 SV=1
2	K.C[+57.021]IQHYEN[+1694.603]STVPENK.I-NeuAc(1)Fuc(1)Hex(4)HexNAc(3)	-5.88474	-0.745832	-0.837983	-5.7501	-5.68176	>tr|G1SWF6|G1SWF6_RABIT Haptoglobin OS=Oryctolagus cuniculus OX=9986 PE=3 SV=1
2	K.C[+57.021]TFSYVENGYRPSSERPYLQN[+2204.772]ESVK.V-NeuAc(2)Hex(5)HexNAc(4)	-5.84055	0.0157761487075127	-0.852159	-5.63692	-5.94077	>tr|A0A5F9CG95|A0A5F9CG95_RABIT Uncharacterized protein OS=Oryctolagus cuniculus OX=9986 PE=4 SV=1
2	K.DINN[+1913.677]VTYVWGIVSWGENC[+57.021]GKPEFPGVYTK.V-NeuAc(1)Hex(5)HexNAc(4)	-5.64703	-0.784926	-0.837983	-5.654	-5.78825	>tr|A0A5F9CAP0|A0A5F9CAP0_RABIT Uncharacterized protein OS=Oryctolagus cuniculus OX=9986 PE=4 SV=1
2	K.DLKPEDFELLC[+57.021]LN[+1913.677]GTR.K-NeuAc(1)Hex(5)HexNAc(4)	-6.33478	-0.1967	-0.28996	-5.95124	-0.758977	>tr|G1TKE4|G1TKE4_RABIT Uncharacterized protein OS=Oryctolagus cuniculus OX=9986 PE=3 SV=1
2	K.DLKPEDFELLC[+57.021]LN[+2204.772]GTR.K-NeuAc(2)Hex(5)HexNAc(4)	0.188906588243672	1.63238946988232	1.13839548327497	-0.79502	0.620605188559783	>tr|G1TKE4|G1TKE4_RABIT Uncharacterized protein OS=Oryctolagus cuniculus OX=9986 PE=3 SV=1
2	K.DTIIKPLLVEPEGLEKEETFNSLLC[+57.021]PSGGELSYQLFLELPLNVVN[+1913.677]ESAR.A-NeuAc(1)Hex(5)HexNAc(4)	-6.00557	0.686366286057981	0.635181407739946	-6.50346	-0.684957	>tr|G1SQ70|G1SQ70_RABIT Alpha-2-macroglobulin OS=Oryctolagus cuniculus OX=9986 GN=A2M PE=3 SV=3
2	K.DTIIKPLLVEPEGLEKEETFNSLLC[+57.021]PSGGELSYQLFLELPLNVVN[+2204.772]ESAR.A-NeuAc(2)Hex(5)HexNAc(4)	-6.27881	0.176398772369551	0.0870922090334206	-0.79502	-5.84618	>tr|G1SQ70|G1SQ70_RABIT Alpha-2-macroglobulin OS=Oryctolagus cuniculus OX=9986 GN=A2M PE=3 SV=3
2	K.EETFNSLLC[+57.021]PSGGELSYQLFLELPLNVVN[+2204.772]ESAR.A-NeuAc(2)Hex(5)HexNAc(4)	-6.04332	0.50222793774012	0.660496472425597	-6.19296	-6.07919	>tr|G1SQ70|G1SQ70_RABIT Alpha-2-macroglobulin OS=Oryctolagus cuniculus OX=9986 GN=A2M PE=3 SV=3
2	K.EKPIPN[+1444.534]KTVFVSVDAHAHQLSFTTNER.G-Fuc(1)Hex(3)HexNAc(4)	-5.84369	-0.784926	-0.668729	-6.16817	-5.64052	>tr|A0A5F9C1C5|A0A5F9C1C5_RABIT Uncharacterized protein OS=Oryctolagus cuniculus OX=9986 PE=3 SV=1
2	K.EKPIPN[+2204.772]K.T-NeuAc(2)Hex(5)HexNAc(4)	0.443085155640002	0.686366286057981	0.705141024801227	0.611067246456659	0.455176004494049	>tr|A0A5F9DH12|A0A5F9DH12_RABIT Uncharacterized protein OS=Oryctolagus cuniculus OX=9986 PE=3 SV=1
2	K.ELHHLQEQN[+2190.793]VSNPFLDKEEFYIGSK.Y-Hex(6)HexNAc(6)	-5.8794	-0.784926	-0.866483	-5.48766	-5.9161	>tr|G1SJX3|G1SJX3_RABIT Ceruloplasmin OS=Oryctolagus cuniculus OX=9986 GN=CP PE=3 SV=1
2	K.ELHHLQEQN[+2278.809]VSNPFLDKEEFYIGSK.Y-NeuAc(1)Hex(6)HexNAc(5)	-6.21952	-0.784926	0.0476300521182762	-6.24435	-5.94263	>tr|G1SJX3|G1SJX3_RABIT Ceruloplasmin OS=Oryctolagus cuniculus OX=9986 GN=CP PE=3 SV=1
2	K.ELHHLQEQN[+2569.905]VSNPFLDK.E-NeuAc(2)Hex(6)HexNAc(5)	-5.56765	-0.745832	-0.313519	-6.04213	-5.79827	>tr|G1SJX3|G1SJX3_RABIT Ceruloplasmin OS=Oryctolagus cuniculus OX=9986 GN=CP PE=3 SV=1
2	K.ELHHLQEQN[+2715.963]VSNPFLDKEEFYIGSK.Y-NeuAc(2)Fuc(1)Hex(6)HexNAc(5)	-6.30475	-0.745832	-0.668729	-0.835796	-5.96681	>tr|G1SJX3|G1SJX3_RABIT Ceruloplasmin OS=Oryctolagus cuniculus OX=9986 GN=CP PE=3 SV=1
2	K.EVSQQIYSQGC[+57.021]LTQQVN[+2204.772]TSMFQLK.D-NeuAc(2)Hex(5)HexNAc(4)	-6.41106	1.60805762452413	-0.866483	-5.62356	-5.68486	>tr|A0A5F9CCK9|A0A5F9CCK9_RABIT Uncharacterized protein OS=Oryctolagus cuniculus OX=9986 PE=3 SV=1
2	K.EVVSLTEDC[+57.021]C[+57.021]AEDADPGC[+57.021]YDN[+1913.677]R.T-NeuAc(1)Hex(5)HexNAc(4)	-0.0761853	2.67219529888525	1.80310837579395	0.88136253023884	0.916255633525855	>tr|G1SU82|G1SU82_RABIT Gc-globulin OS=Oryctolagus cuniculus OX=9986 GN=GC PE=4 SV=2
2	K.EVVSLTEDC[+57.021]C[+57.021]AEDADPGC[+57.021]YDN[+2569.905]R.T-NeuAc(2)Hex(6)HexNAc(5)	-6.37599	-0.765241	-0.837983	-5.59986	-6.14694	>tr|G1SU82|G1SU82_RABIT Gc-globulin OS=Oryctolagus cuniculus OX=9986 GN=GC PE=4 SV=2
2	K.FN[+2206.813]LTETAEAQIHDGFR.H-Fuc(4)Hex(5)HexNAc(4)	-0.0761853	0.606654261236298	0.650919786882816	0.221622246184235	0.222099062710251	>tr|G1TGM8|G1TGM8_RABIT SERPIN domain-containing protein OS=Oryctolagus cuniculus OX=9986 GN=SERPINA1 PE=3 SV=1
2	K.GC[+57.021]LLLSQLN[+2204.772]ETVTVTASLEALR.E-NeuAc(2)Hex(5)HexNAc(4)	-5.48411	1.17429795470401	1.21846460721839	-6.50236	-0.758977	>tr|G1SQ70|G1SQ70_RABIT Alpha-2-macroglobulin OS=Oryctolagus cuniculus OX=9986 GN=A2M PE=3 SV=3
2	K.GHNAQNN[+1913.677]VSQNVFLGHTNVEEIMK.L-NeuAc(1)Hex(5)HexNAc(4)	-5.66094	-0.745832	-0.28996	-5.87317	-5.98096	>tr|G1T7H9|G1T7H9_RABIT Complement C1r OS=Oryctolagus cuniculus OX=9986 GN=C1R PE=4 SV=2
2	K.GIPMPN[+1548.545]K.T-NeuAc(1)Hex(4)HexNAc(3)	0.102968170370198	0.648945550156319	1.0397241377168	-0.755305	0.242775948696157	>tr|G1SQ70|G1SQ70_RABIT Alpha-2-macroglobulin OS=Oryctolagus cuniculus OX=9986 GN=A2M PE=3 SV=3
2	K.GIPMPN[+1751.624]K.T-NeuAc(1)Hex(4)HexNAc(4)	-0.167891	0.918626873859717	0.285488893648089	-0.416012	-0.305489	>tr|G1SQ70|G1SQ70_RABIT Alpha-2-macroglobulin OS=Oryctolagus cuniculus OX=9986 GN=A2M PE=3 SV=3
2	K.GIPMPN[+1914.697]K.T-Fuc(2)Hex(5)HexNAc(4)	-0.629762	0.0313484800569794	-0.0311637	-0.0150889	-0.721466	>tr|G1SQ70|G1SQ70_RABIT Alpha-2-macroglobulin OS=Oryctolagus cuniculus OX=9986 GN=A2M PE=3 SV=3
2	K.GKWEKPFEPENTKEEDFHVN[+1913.677]ATTTVR.V-NeuAc(1)Hex(5)HexNAc(4)	-0.166109	1.65787062645715	1.72128642145743	0.840536405342241	0.441108450760402	>tr|G1TFV7|G1TFV7_RABIT SERPIN domain-containing protein OS=Oryctolagus cuniculus OX=9986 GN=SERPINA1 PE=3 SV=2
2	K.GKWEKPFEPENTKEEDFHVN[+2204.772]ATTTVR.V-NeuAc(2)Hex(5)HexNAc(4)	1.87638922910262	3.2700534861235	2.94098353485307	0.656007435994365	1.75903822372857	>tr|G1TFV7|G1TFV7_RABIT SERPIN domain-containing protein OS=Oryctolagus cuniculus OX=9986 GN=SERPINA1 PE=3 SV=2
2	K.GKWEKPFEPENTKEEDFHVN[+2206.813]ATTTVR.V-Fuc(4)Hex(5)HexNAc(4)	-5.77032	-0.765241	-0.119249	-6.40061	-6.0404	>tr|A0A5F9DT67|A0A5F9DT67_RABIT SERPIN domain-containing protein OS=Oryctolagus cuniculus OX=9986 GN=SERPINA1 PE=3 SV=1
2	K.GKWEKPFEPENTKEEDFHVN[+2245.799]ATTTVR.V-NeuAc(2)Hex(4)HexNAc(5)	-5.71346	-0.581775	-0.837983	-5.68561	-6.14818	>tr|A0A5F9DT67|A0A5F9DT67_RABIT SERPIN domain-containing protein OS=Oryctolagus cuniculus OX=9986 GN=SERPINA1 PE=3 SV=1
2	K.GKWEKPFEPENTKEEDFHVN[+2247.840]ATTTVR.V-Fuc(4)Hex(4)HexNAc(5)	-6.01517	-0.435018	-0.866483	-6.17986	-5.97367	>tr|A0A5F9DT67|A0A5F9DT67_RABIT SERPIN domain-containing protein OS=Oryctolagus cuniculus OX=9986 GN=SERPINA1 PE=3 SV=1
2	K.GN[+1913.677]ATALFLLPDEGK.L-NeuAc(1)Hex(5)HexNAc(4)	1.95404793176807	2.4536794568504	2.39304307721803	1.87729657650549	2.19240706776735	>tr|G1TGM8|G1TGM8_RABIT SERPIN domain-containing protein OS=Oryctolagus cuniculus OX=9986 GN=SERPINA1 PE=3 SV=1
2	K.GN[+2247.840]ATALFLLPDEGK.L-Fuc(4)Hex(4)HexNAc(5)	-5.68692	-0.435018	0.0476300521182762	-6.1656	-5.84734	>tr|G1TGM8|G1TGM8_RABIT SERPIN domain-containing protein OS=Oryctolagus cuniculus OX=9986 GN=SERPINA1 PE=3 SV=1
2	K.GVPIPN[+2204.772]ETIFIQAHSANFFLK.A-NeuAc(2)Hex(5)HexNAc(4)	-6.25921	0.253957014626389	-0.852159	-6.02605	-5.74599	>tr|G1TR31|G1TR31_RABIT Uncharacterized protein OS=Oryctolagus cuniculus OX=9986 PE=3 SV=3
2	K.IITFLEEEVN[+1710.598]VSVC[+57.021]GIYTYGK.A-NeuAc(1)Hex(5)HexNAc(3)	-6.12899	0.176398772369551	-0.837983	-6.21603	-5.80383	>tr|G1SQ70|G1SQ70_RABIT Alpha-2-macroglobulin OS=Oryctolagus cuniculus OX=9986 GN=A2M PE=3 SV=3
2	K.ILFPYSYN[+1913.677]R.S-NeuAc(1)Hex(5)HexNAc(4)	-6.17176	-0.765241	-0.837983	-6.1992	-6.30904	>tr|G1TET0|G1TET0_RABIT Carboxypeptidase B2 OS=Oryctolagus cuniculus OX=9986 GN=CPB2 PE=3 SV=2
2	K.IQLC[+57.021]PPPPQIPYSQN[+1913.677]VTTTVNYQDGEK.M-NeuAc(1)Hex(5)HexNAc(4)	-6.04376	-0.435018	-0.852159	-6.44007	-5.7375	>tr|A0A5F9CG95|A0A5F9CG95_RABIT Uncharacterized protein OS=Oryctolagus cuniculus OX=9986 PE=4 SV=1
2	K.IQLC[+57.021]PPPPQIPYSQN[+2204.772]VTTTVNYQDGEK.M-NeuAc(2)Hex(5)HexNAc(4)	-6.04917	-0.745832	-0.866483	-5.8045	-5.86298	>tr|A0A5F9CG95|A0A5F9CG95_RABIT Uncharacterized protein OS=Oryctolagus cuniculus OX=9986 PE=4 SV=1
2	K.IYSGVDFGGEELN[+2204.772]VTFVK.G-NeuAc(2)Hex(5)HexNAc(4)	-5.52213	2.04091	0.660496472425597	-0.755305	-5.62944	>tr|G1T127|G1T127_RABIT Kallikrein B1 OS=Oryctolagus cuniculus OX=9986 GN=KLKB1 PE=4 SV=2
2	K.KDTIIKPLLVEPEGLEKEETFNSLLC[+57.021]PSGGELSYQLFLELPLNVVN[+2204.772]ESAR.A-NeuAc(2)Hex(5)HexNAc(4)	-5.67767	-0.599015	-0.299481	-6.14933	-5.55172	>tr|G1SQ70|G1SQ70_RABIT Alpha-2-macroglobulin OS=Oryctolagus cuniculus OX=9986 GN=A2M PE=3 SV=3
2	K.KLHINHNN[+1768.640]LTESVGPLPK.S-Fuc(1)Hex(5)HexNAc(4)	-6.0887	-0.745832	-0.837983	-5.96151	-6.13117	>tr|G1SP97|G1SP97_RABIT Lumican OS=Oryctolagus cuniculus OX=9986 GN=LUM PE=3 SV=1
2	K.KLHINHNN[+2076.750]LTESVGPLPK.S-Fuc(2)Hex(6)HexNAc(4)	-6.11645	-0.745832	-0.28996	-6.02937	-6.17911	>tr|G1SP97|G1SP97_RABIT Lumican OS=Oryctolagus cuniculus OX=9986 GN=LUM PE=3 SV=1
2	K.KLHINHNN[+2204.772]LTESVGPLPK.S-NeuAc(2)Hex(5)HexNAc(4)	-5.66257	-0.599015	1.01096447337039	-5.27359	-5.91519	>tr|G1SP97|G1SP97_RABIT Lumican OS=Oryctolagus cuniculus OX=9986 GN=LUM PE=3 SV=1
2	K.KLHINHNN[+2278.809]LTESVGPLPK.S-NeuAc(1)Hex(6)HexNAc(5)	-6.23163	-0.599015	-0.837983	-5.85348	-6.44109	>tr|G1SP97|G1SP97_RABIT Lumican OS=Oryctolagus cuniculus OX=9986 GN=LUM PE=3 SV=1
2	K.KLHINHNN[+2424.867]LTESVGPLPK.S-NeuAc(1)Fuc(1)Hex(6)HexNAc(5)	0.187490070772565	1.08338627052746	0.974026834206521	-0.61153	0.242775948696157	>tr|G1SP97|G1SP97_RABIT Lumican OS=Oryctolagus cuniculus OX=9986 GN=LUM PE=3 SV=1
2	K.KLHINHNN[+2569.905]LTESVGPLPK.S-NeuAc(2)Hex(6)HexNAc(5)	-5.84291	-0.581775	-0.668729	-5.85642	-6.20206	>tr|G1SP97|G1SP97_RABIT Lumican OS=Oryctolagus cuniculus OX=9986 GN=LUM PE=3 SV=1
2	K.LASTHSELN[+1548.545]ITQGEWASK.R-NeuAc(1)Hex(4)HexNAc(3)	-6.20434	-0.599015	-0.852159	-5.72921	-6.0427	>tr|G1SK63|G1SK63_RABIT Uncharacterized protein OS=Oryctolagus cuniculus OX=9986 PE=4 SV=3
2	K.LASTHSELN[+1751.624]ITQGEWASK.R-NeuAc(1)Hex(4)HexNAc(4)	-5.84971	-0.581775	-0.852159	-5.79548	-5.48992	>tr|G1SK63|G1SK63_RABIT Uncharacterized protein OS=Oryctolagus cuniculus OX=9986 PE=4 SV=3
2	K.LC[+57.021]PDC[+57.021]PLLTPLN[+1913.677]DTR.V-NeuAc(1)Hex(5)HexNAc(4)	1.09494810435053	1.80669785219364	1.59357090449274	0.621364713666574	1.39723387911788	>tr|U3KMR2|U3KMR2_RABIT Alpha-2-HS-glycoprotein OS=Oryctolagus cuniculus OX=9986 GN=AHSG PE=4 SV=1
2	K.LC[+57.021]PDC[+57.021]PLLTPLN[+2569.905]DTR.V-NeuAc(2)Hex(6)HexNAc(5)	0.352706401928955	0.87903555764311	1.15268096545229	0.611067246456659	-0.299272	>tr|U3KMR2|U3KMR2_RABIT Alpha-2-HS-glycoprotein OS=Oryctolagus cuniculus OX=9986 GN=AHSG PE=4 SV=1
2	K.LHINHNN[+1768.640]LTESVGPLPK.S-Fuc(1)Hex(5)HexNAc(4)	-6.43617	0.196143475982252	-0.299481	-6.31614	-5.30117	>tr|G1SP97|G1SP97_RABIT Lumican OS=Oryctolagus cuniculus OX=9986 GN=LUM PE=3 SV=1
2	K.LHINHNN[+1913.677]LTESVGPLPK.S-NeuAc(1)Hex(5)HexNAc(4)	-5.9831	0.380135525537159	-0.189594	-6.00322	-5.5467	>tr|G1SP97|G1SP97_RABIT Lumican OS=Oryctolagus cuniculus OX=9986 GN=LUM PE=3 SV=1
2	K.LHINHNN[+1914.697]LTESVGPLPK.S-Fuc(2)Hex(5)HexNAc(4)	-5.84719	0.0202708759387374	-0.866483	-5.79319	-5.73266	>tr|G1SP97|G1SP97_RABIT Lumican OS=Oryctolagus cuniculus OX=9986 GN=LUM PE=3 SV=1
2	K.LHINHNN[+2204.772]LTESVGPLPK.S-NeuAc(2)Hex(5)HexNAc(4)	-6.30131	0.494336494895723	0.0706913138275425	-0.835796	-6.53978	>tr|G1SP97|G1SP97_RABIT Lumican OS=Oryctolagus cuniculus OX=9986 GN=LUM PE=3 SV=1
2	K.LHINHNN[+2457.877]LTESVGPLPK.S-Fuc(1)Hex(8)HexNAc(5)	-5.35039	-0.209757	-0.866483	-0.79502	-6.40736	>tr|G1SP97|G1SP97_RABIT Lumican OS=Oryctolagus cuniculus OX=9986 GN=LUM PE=3 SV=1
2	K.LHINHNN[+2569.905]LTESVGPLPK.S-NeuAc(2)Hex(6)HexNAc(5)	-5.82135	-0.280872	-0.319969	-5.97322	-6.50677	>tr|G1SP97|G1SP97_RABIT Lumican OS=Oryctolagus cuniculus OX=9986 GN=LUM PE=3 SV=1
2	K.LHVLRC[+57.021]QGRN[+1987.714]YTLTGMDSC[+57.021]AVPAAVQK.A-Hex(6)HexNAc(5)	-6.24397	0.176398772369551	-0.668729	-6.22352	-6.54337	>tr|A0A5F9DPA2|A0A5F9DPA2_RABIT Caspase recruitment domain family member 6 OS=Oryctolagus cuniculus OX=9986 GN=CARD6 PE=3 SV=1
2	K.LHVLRC[+57.021]QGRN[+2204.772]YTLTGMDSC[+57.021]AVPAAVQK.A-NeuAc(2)Hex(5)HexNAc(4)	-6.48566	-0.745832	-0.837983	-6.26197	-5.62783	>tr|A0A5F9DPA2|A0A5F9DPA2_RABIT Caspase recruitment domain family member 6 OS=Oryctolagus cuniculus OX=9986 GN=CARD6 PE=3 SV=1
2	K.LNAENN[+1914.697]ETFFFK.I-Fuc(2)Hex(5)HexNAc(4)	-6.05001	-0.599015	0.37494182555044	-6.01057	-6.28648	>tr|A0A5F9CHF0|A0A5F9CHF0_RABIT Kininogen 1 OS=Oryctolagus cuniculus OX=9986 GN=KNG1 PE=4 SV=1
2	K.LQEQPHIQRTEVSTNHVLIYFEELTN[+1913.677]KTLSFSFLVEQDIQIENLKPATVK.A-NeuAc(1)Hex(5)HexNAc(4)	-6.32717	0.527265140466286	0.0476300521182762	-5.91377	-6.10305	>tr|A0A5F9C1C5|A0A5F9C1C5_RABIT Uncharacterized protein OS=Oryctolagus cuniculus OX=9986 PE=3 SV=1
2	K.LQEQPHIQRTEVSTNHVLIYFEELTN[+2204.772]KTLSFSFLVEQDIQIENLKPATVK.A-NeuAc(2)Hex(5)HexNAc(4)	-5.3146	0.771355216801598	0.406178864204678	-5.57529	0.240520073561946	>tr|A0A5F9C1C5|A0A5F9C1C5_RABIT Uncharacterized protein OS=Oryctolagus cuniculus OX=9986 PE=3 SV=1
2	K.LQGPVAVYTWEGNQVN[+1913.677]ITC[+57.021]EVFAYPSATISWFR.D-NeuAc(1)Hex(5)HexNAc(4)	-4.85692	-0.784926	-0.837983	-5.5379	-6.00522	>tr|G1SQI4|G1SQI4_RABIT Neural cell adhesion molecule 1 OS=Oryctolagus cuniculus OX=9986 GN=NCAM1 PE=4 SV=3
2	K.N[+1419.502]NSEISSR.T-Hex(5)HexNAc(3)	-5.90899	-0.435018	-0.299481	-0.416012	-5.81715	>sp|P03988|IGHM_RABIT Ig mu chain C region secreted form OS=Oryctolagus cuniculus OX=9986 PE=2 SV=1
2	K.N[+1622.582]SSLC[+57.021]ELC[+57.021]IGPSVC[+57.021]APNNR.E-Hex(5)HexNAc(4)	-0.629762	0.380135525537159	-0.0364198	-0.79502	-0.299272	>tr|G1STF7|G1STF7_RABIT Beta-1 metal-binding globulin OS=Oryctolagus cuniculus OX=9986 PE=3 SV=1
2	K.N[+1622.582]SSLC[+57.021]ELC[+57.021]VGPSVC[+57.021]APNNR.E-Hex(5)HexNAc(4)	-0.629762	0.561981483799553	0.285488893648089	-0.657968	-0.323803	>sp|P19134|TRFE_RABIT Serotransferrin OS=Oryctolagus cuniculus OX=9986 GN=TF PE=1 SV=4
2	K.N[+1647.613]SSLC[+57.021]ELC[+57.021]IGPSVC[+57.021]APNNR.E-Fuc(1)Hex(3)HexNAc(5)	-5.8388	-0.435018	0.593173151808632	-6.23971	-5.88755	>tr|G1STF7|G1STF7_RABIT Beta-1 metal-binding globulin OS=Oryctolagus cuniculus OX=9986 PE=3 SV=1
2	K.N[+1647.613]SSLC[+57.021]ELC[+57.021]VGPSVC[+57.021]APNNR.E-Fuc(1)Hex(3)HexNAc(5)	-6.66053	-0.745832	-0.852159	-6.25688	-5.96258	>sp|P19134|TRFE_RABIT Serotransferrin OS=Oryctolagus cuniculus OX=9986 GN=TF PE=1 SV=4
2	K.N[+1768.640]SSLC[+57.021]ELC[+57.021]IGPSVC[+57.021]APNNR.E-Fuc(1)Hex(5)HexNAc(4)	-5.75633	-0.435018	0.0870922090334206	-5.61066	-6.21338	>tr|G1STF7|G1STF7_RABIT Beta-1 metal-binding globulin OS=Oryctolagus cuniculus OX=9986 PE=3 SV=1
2	K.N[+1768.640]SSLC[+57.021]ELC[+57.021]VGPSVC[+57.021]APNNR.E-Fuc(1)Hex(5)HexNAc(4)	-6.15039	-0.0960327	0.285488893648089	-5.69819	-6.0104	>sp|P19134|TRFE_RABIT Serotransferrin OS=Oryctolagus cuniculus OX=9986 GN=TF PE=1 SV=4
2	K.N[+1872.651]SSLC[+57.021]ELC[+57.021]IGPSVC[+57.021]APNNR.E-NeuAc(1)Hex(6)HexNAc(3)	-6.07425	-0.435018	-0.361877	-6.08418	-6.04135	>tr|G1STF7|G1STF7_RABIT Beta-1 metal-binding globulin OS=Oryctolagus cuniculus OX=9986 PE=3 SV=1
2	K.N[+1907.714]C[+57.021]TR.S-Hex(3)HexNAc(7)	-6.04797	-0.435018	0.115691052274908	-5.7566	-5.68383	>tr|G1SEL1|G1SEL1_RABIT Complement factor H related 5 OS=Oryctolagus cuniculus OX=9986 GN=CFHR5 PE=4 SV=2
2	K.N[+1913.677]SSLC[+57.021]ELC[+57.021]IGPSVC[+57.021]APNNR.E-NeuAc(1)Hex(5)HexNAc(4)	2.06476771654369	3.10127910046776	2.96035616607168	2.46792063512247	2.48170577720194	>tr|G1STF7|G1STF7_RABIT Beta-1 metal-binding globulin OS=Oryctolagus cuniculus OX=9986 PE=3 SV=1
2	K.N[+1914.697]GSLFAFR.G-Fuc(2)Hex(5)HexNAc(4)	-5.70397	-0.435018	-0.866483	-6.74458	-5.63168	>tr|G1U415|G1U415_RABIT Vitronectin OS=Oryctolagus cuniculus OX=9986 GN=VTN PE=4 SV=1
2	K.N[+1914.697]SSLC[+57.021]ELC[+57.021]IGPSVC[+57.021]APNNR.E-Fuc(2)Hex(5)HexNAc(4)	0.190321812492477	1.33238840110893	0.790347568783158	-0.064165	0.0057244580162851	>tr|G1STF7|G1STF7_RABIT Beta-1 metal-binding globulin OS=Oryctolagus cuniculus OX=9986 PE=3 SV=1
2	K.N[+1971.719]SSLC[+57.021]ELC[+57.021]IGPSVC[+57.021]APNNR.E-Fuc(1)Hex(5)HexNAc(5)	-5.85351	-0.435018	0.406178864204678	-5.88111	-6.12843	>tr|G1STF7|G1STF7_RABIT Beta-1 metal-binding globulin OS=Oryctolagus cuniculus OX=9986 PE=3 SV=1
2	K.N[+2190.793]SSLC[+57.021]ELC[+57.021]VGPSVC[+57.021]APNNR.E-Hex(6)HexNAc(6)	-5.19728	0.176398772369551	-0.852159	-6.05375	-5.94965	>sp|P19134|TRFE_RABIT Serotransferrin OS=Oryctolagus cuniculus OX=9986 GN=TF PE=1 SV=4
2	K.N[+2204.772]SSLC[+57.021]ELC[+57.021]IGPSVC[+57.021]APNNR.E-NeuAc(2)Hex(5)HexNAc(4)	3.11018963574601	3.35490929978004	3.68079860818914	2.84980446647622	3.20540097329709	>tr|G1STF7|G1STF7_RABIT Beta-1 metal-binding globulin OS=Oryctolagus cuniculus OX=9986 PE=3 SV=1
2	K.N[+2245.799]ETYQLFLSYSSQK.E-NeuAc(2)Hex(4)HexNAc(5)	-5.4646	-0.435018	-0.837983	-6.28554	-6.94411	>sp|P48747|CO9_RABIT Complement component C9 OS=Oryctolagus cuniculus OX=9986 GN=C9 PE=1 SV=1
2	K.N[+2262.814]SSLC[+57.021]ELC[+57.021]VGPSVC[+57.021]APNNR.E-NeuAc(1)Fuc(1)Hex(5)HexNAc(5)	1.9052200543133	2.63966498555963	2.36872052547743	1.08860902381085	1.81349755036539	>sp|P19134|TRFE_RABIT Serotransferrin OS=Oryctolagus cuniculus OX=9986 GN=TF PE=1 SV=4
2	K.N[+2350.830]SSLC[+57.021]ELC[+57.021]IGPSVC[+57.021]APNNR.E-NeuAc(2)Fuc(1)Hex(5)HexNAc(4)	0.145805118190613	1.67565861651142	1.14064521110835	0.814972007449565	0.441108450760402	>tr|G1STF7|G1STF7_RABIT Beta-1 metal-binding globulin OS=Oryctolagus cuniculus OX=9986 PE=3 SV=1
2	K.N[+2350.830]SSLC[+57.021]ELC[+57.021]VGPSVC[+57.021]APNNR.E-NeuAc(2)Fuc(1)Hex(5)HexNAc(4)	1.87686586539532	2.1314383553672	2.20018035898434	1.72512838086919	1.66525069593639	>sp|P19134|TRFE_RABIT Serotransferrin OS=Oryctolagus cuniculus OX=9986 GN=TF PE=1 SV=4
2	K.N[+2407.852]C[+57.021]TR.S-NeuAc(2)Hex(5)HexNAc(5)	-5.98172	-0.765241	-0.837983	-5.86007	-6.39888	>tr|G1SEL1|G1SEL1_RABIT Complement factor H related 5 OS=Oryctolagus cuniculus OX=9986 GN=CFHR5 PE=4 SV=2
2	K.N[+2569.905]GSLFAFR.G-NeuAc(2)Hex(6)HexNAc(5)	-6.09674	-0.435018	-0.866483	-5.98965	-6.38195	>tr|G1U415|G1U415_RABIT Vitronectin OS=Oryctolagus cuniculus OX=9986 GN=VTN PE=4 SV=1
2	K.N[+3517.228]MSK.S-NeuAc(4)Hex(7)HexNAc(6)	-5.67123	-0.784926	-0.837983	-5.82895	-6.45918	>tr|Q9TTJ4|Q9TTJ4_RABIT Inter-alpha-trypsin inhibitor heavy chain H1 OS=Oryctolagus cuniculus OX=9986 GN=ITI HC1 PE=2 SV=1
2	K.NNGAFN[+1540.529]ETLLR.N-Hex(7)HexNAc(2)	-0.629762	-0.191466	-0.0364198	-0.61153	-0.700839	>tr|G1TCW1|G1TCW1_RABIT Transferrin receptor protein 1 OS=Oryctolagus cuniculus OX=9986 GN=TFRC PE=3 SV=2
2	K.PTLYN[+1971.719]VSLIMSDTASTC[+57.021]Y.--Fuc(1)Hex(5)HexNAc(5)	-5.64926	0.176398772369551	-0.361877	-5.9053	-5.99228	>sp|P03988|IGHM_RABIT Ig mu chain C region secreted form OS=Oryctolagus cuniculus OX=9986 PE=2 SV=1
2	K.PTLYN[+2133.772]VSLIMSDTASTC[+57.021]Y.--Fuc(1)Hex(6)HexNAc(5)	-6.54782	-0.209757	-0.668729	-6.02246	-5.52673	>sp|P03988|IGHM_RABIT Ig mu chain C region secreted form OS=Oryctolagus cuniculus OX=9986 PE=2 SV=1
2	K.RFN[+1216.423]GSVSFFR.G-Hex(5)HexNAc(2)	-5.9757	-0.745832	-0.668729	-5.61958	-5.92275	>tr|G1T8V2|G1T8V2_RABIT Microfibril associated protein 4 OS=Oryctolagus cuniculus OX=9986 GN=MFAP4 PE=4 SV=2
2	K.RFN[+1378.476]GSVSFFR.G-Hex(6)HexNAc(2)	-5.9449	-0.784926	-0.852159	-5.76988	-5.92098	>tr|G1T8V2|G1T8V2_RABIT Microfibril associated protein 4 OS=Oryctolagus cuniculus OX=9986 GN=MFAP4 PE=4 SV=2
2	K.RHEEGHMLN[+1913.677]C[+57.021]TC[+57.021]FGQGR.G-NeuAc(1)Hex(5)HexNAc(4)	-6.00509	-0.745832	-0.041696	-5.42562	-5.86991	>tr|A0A5F9CPW4|A0A5F9CPW4_RABIT Fibronectin OS=Oryctolagus cuniculus OX=9986 GN=FN1 PE=4 SV=1
2	K.SGIHVLSITQGN[+2206.813]MTGVFSFSFR.V-Fuc(4)Hex(5)HexNAc(4)	-5.90915	-0.745832	0.115691052274908	-6.0982	-5.96411	>tr|A0A5F9C1C5|A0A5F9C1C5_RABIT Uncharacterized protein OS=Oryctolagus cuniculus OX=9986 PE=3 SV=1
2	K.SGIHVLSITQGN[+2262.814]MTGVFSFSFR.V-NeuAc(1)Fuc(1)Hex(5)HexNAc(5)	-6.58685	0.727278783294405	-0.837983	-6.39714	-0.758977	>tr|A0A5F9C1C5|A0A5F9C1C5_RABIT Uncharacterized protein OS=Oryctolagus cuniculus OX=9986 PE=3 SV=1
2	K.SISTPN[+2204.772]VTILDSSFYVPSYTLALPSLELPVFHVPR.N-NeuAc(2)Hex(5)HexNAc(4)	-6.09737	-0.784926	-0.852159	-0.835796	-6.47117	>tr|G1U9R4|G1U9R4_RABIT Apolipoprotein B OS=Oryctolagus cuniculus OX=9986 GN=APOB PE=4 SV=2
2	K.SLGSVN[+1460.529]FTVSAEALESQELC[+57.021]ENEVAVVPEHGK.K-Hex(4)HexNAc(4)	-5.70407	-0.209757	0.406178864204678	-6.21425	-5.79434	>tr|G1SQ70|G1SQ70_RABIT Alpha-2-macroglobulin OS=Oryctolagus cuniculus OX=9986 GN=A2M PE=3 SV=3
2	K.SLGSVN[+1751.624]FTVSAEALESQELC[+57.021]ENEVAVVPEHGKK.D-NeuAc(1)Hex(4)HexNAc(4)	-6.09265	-0.784926	-0.299481	-5.33597	-6.0292	>tr|G1SQ70|G1SQ70_RABIT Alpha-2-macroglobulin OS=Oryctolagus cuniculus OX=9986 GN=A2M PE=3 SV=3
2	K.SLGSVN[+1913.677]FTVSAEALESQELC[+57.021]ENEVAVVPEHGKK.D-NeuAc(1)Hex(5)HexNAc(4)	-5.89157	-0.784926	0.879303916287243	-6.2953	-6.09013	>tr|G1SQ70|G1SQ70_RABIT Alpha-2-macroglobulin OS=Oryctolagus cuniculus OX=9986 GN=A2M PE=3 SV=3
2	K.SLGSVN[+2206.813]FTVSAEALESQELC[+57.021]ENEVAVVPEHGK.K-Fuc(4)Hex(5)HexNAc(4)	-0.563901	0.949534132332458	1.8580900227856	0.64175371789712	-0.672672	>tr|G1SQ70|G1SQ70_RABIT Alpha-2-macroglobulin OS=Oryctolagus cuniculus OX=9986 GN=A2M PE=3 SV=3
2	K.STGKPTLYN[+1702.581]VSLIMSDTASTC[+57.021].Y-Hex(8)HexNAc(2)	-6.19767	-0.745832	0.0870922090334206	-5.58833	-5.96343	>sp|P03988|IGHM_RABIT Ig mu chain C region secreted form OS=Oryctolagus cuniculus OX=9986 PE=2 SV=1
2	K.TAFITN[+1663.608]FTLWVTIDGVTYPGHVKEK.E-Hex(4)HexNAc(5)	-5.80471	0.527265140466286	0.593173151808632	-6.50711	-6.23097	>tr|A0A5F9DMU6|A0A5F9DMU6_RABIT Inter-alpha-trypsin inhibitor heavy chain H3 OS=Oryctolagus cuniculus OX=9986 GN=ITIH3 PE=3 SV=1
2	K.TAFITN[+2204.772]FTLTIDGVTYPGHVK.E-NeuAc(2)Hex(5)HexNAc(4)	3.47607646887154	4.16633050985729	4.29024393582255	3.6941071155869	3.55495248902314	>sp|Q9GLY5|ITIH3_RABIT Inter-alpha-trypsin inhibitor heavy chain H3 OS=Oryctolagus cuniculus OX=9986 GN=ITIH3 PE=2 SV=1
2	K.TN[+2861.000]GSHVYTK.A-NeuAc(3)Hex(6)HexNAc(5)	-6.30212	-0.765241	-0.852159	-6.15957	-6.05797	>tr|G1TR31|G1TR31_RABIT Uncharacterized protein OS=Oryctolagus cuniculus OX=9986 PE=3 SV=3
2	K.TNN[+2424.867]LSK.K-NeuAc(1)Fuc(1)Hex(6)HexNAc(5)	-6.05156	-0.784926	-0.852159	-5.77781	-6.16009	>tr|G1T6S4|G1T6S4_RABIT Dystonin OS=Oryctolagus cuniculus OX=9986 GN=DST PE=3 SV=3
2	K.TPQNSADC[+57.021]TYN[+1540.529]LSSTLTLTSTQYNSHK.E-Hex(7)HexNAc(2)	-5.76123	-0.784926	0.682204174695553	-0.79502	-6.02579	>tr|A0A1Y1B9K3|A0A1Y1B9K3_RABIT IgM light chain (Fragment) OS=Oryctolagus cuniculus OX=9986 PE=2 SV=1
2	K.VISN[+2861.000]ATEVK.E-NeuAc(3)Hex(6)HexNAc(5)	-5.93567	0.362848905111935	0.0550434595798335	-5.96461	-6.11284	>tr|A0A4Z2D1A1|A0A4Z2D1A1_SCHJA Netrin receptor UNC5 OS=Schistosoma japonicum OX=6182 GN=EWB00_005545 PE=3 SV=1
2	K.VLN[+2204.772]FTMK.A-NeuAc(2)Hex(5)HexNAc(4)	0.188906588243672	0.727278783294405	0.638417597040303	0.399609575616516	0.259028539628061	>tr|A0A5F9DR45|A0A5F9DR45_RABIT Complement component C6 OS=Oryctolagus cuniculus OX=9986 GN=C6 PE=3 SV=1
2	K.VLNQELRPDGTVNQIEGQATQSN[+2204.772]LTEPAK.L-NeuAc(2)Hex(5)HexNAc(4)	-5.71058	-0.745832	-0.361877	-6.01794	-5.94101	>sp|P37153|APOD_RABIT Apolipoprotein D OS=Oryctolagus cuniculus OX=9986 GN=APOD PE=2 SV=1
2	K.VLNQELRPDGTVNQIEGQATQSN[+3372.190]LTEPAK.L-NeuAc(3)Fuc(1)Hex(7)HexNAc(6)	-0.563901	0.315478223114547	-0.041696	-0.416012	-0.672672	>sp|P37153|APOD_RABIT Apolipoprotein D OS=Oryctolagus cuniculus OX=9986 GN=APOD PE=2 SV=1
2	K.VREEGTGLELTGYGSSEITNN[+1216.423]LSK.L-Hex(5)HexNAc(2)	-6.21175	-0.646255	-0.837983	-6.17563	-5.7435	>tr|A0A5F9C1C5|A0A5F9C1C5_RABIT Uncharacterized protein OS=Oryctolagus cuniculus OX=9986 PE=3 SV=1
2	K.VSN[+1622.582]QTLSLSFTVVQEIPVIDLKPAIVK.V-Hex(5)HexNAc(4)	-6.28832	-0.191466	-0.299481	-6.58551	-0.660497	>tr|A0A5F9CQC0|A0A5F9CQC0_RABIT Alpha-2-macroglobulin OS=Oryctolagus cuniculus OX=9986 GN=A2M PE=3 SV=1
2	K.VSN[+2190.793]QTLSLSFTVVQEIPVIDLKPAIVK.V-Hex(6)HexNAc(6)	-5.97757	0.527265140466286	0.0476300521182762	-5.64443	-0.684957	>tr|A0A5F9CQC0|A0A5F9CQC0_RABIT Alpha-2-macroglobulin OS=Oryctolagus cuniculus OX=9986 GN=A2M PE=3 SV=1
2	K.VSN[+2204.772]QTLSLSFTVVQDIPVIDLKPAIVK.V-NeuAc(2)Hex(5)HexNAc(4)	2.82489888533196	3.58203137317803	3.35433298228448	2.12412880300623	2.18855866497425	>tr|G1SQ70|G1SQ70_RABIT Alpha-2-macroglobulin OS=Oryctolagus cuniculus OX=9986 GN=A2M PE=3 SV=3
2	K.VTHTLLN[+1501.555]SSC[+57.021]DPFR.Y-Hex(3)HexNAc(5)	-5.77533	-0.435018	-0.837983	-6.396	-6.40427	>tr|A0A4Z2CP65|A0A4Z2CP65_SCHJA Uncharacterized protein OS=Schistosoma japonicum OX=6182 GN=EWB00_008685 PE=4 SV=1
2	K.VTMPKIITFLEEEVN[+1710.598]VSVC[+57.021]GIYTYGKAVPGHVTMK.I-NeuAc(1)Hex(5)HexNAc(3)	-6.24464	-0.784926	0.406178864204678	-6.27933	-6.12876	>tr|G1SQ70|G1SQ70_RABIT Alpha-2-macroglobulin OS=Oryctolagus cuniculus OX=9986 GN=A2M PE=3 SV=3
2	K.VTMPKIITFLEEEVN[+1913.677]VSVC[+57.021]GIYTYGK.A-NeuAc(1)Hex(5)HexNAc(4)	-5.79706	0.176398772369551	-0.852159	-6.18503	-5.28379	>tr|G1SQ70|G1SQ70_RABIT Alpha-2-macroglobulin OS=Oryctolagus cuniculus OX=9986 GN=A2M PE=3 SV=3
2	K.VTMPKIITFLEEEVN[+1913.677]VSVC[+57.021]GIYTYGKAVPGHVTMK.I-NeuAc(1)Hex(5)HexNAc(4)	-6.1448	-0.209757	0.660496472425597	-0.755305	-5.79231	>tr|G1SQ70|G1SQ70_RABIT Alpha-2-macroglobulin OS=Oryctolagus cuniculus OX=9986 GN=A2M PE=3 SV=3
2	K.VTMPKIITFLEEEVN[+2204.772]VSVC[+57.021]GIYTYGKAVPGHVTMK.I-NeuAc(2)Hex(5)HexNAc(4)	-5.84616	-0.1967	0.406178864204678	-6.2049	-5.96967	>tr|G1SQ70|G1SQ70_RABIT Alpha-2-macroglobulin OS=Oryctolagus cuniculus OX=9986 GN=A2M PE=3 SV=3
2	K.VVLHPN[+1914.697]YSEVDIGLIK.L-Fuc(2)Hex(5)HexNAc(4)	-5.97918	-0.435018	0.64610645482226	-6.04482	-6.22458	>tr|G1SWF6|G1SWF6_RABIT Haptoglobin OS=Oryctolagus cuniculus OX=9986 PE=3 SV=1
2	K.VYSLSWGEVNLLSN[+1913.677]C[+57.021]SK.F-NeuAc(1)Hex(5)HexNAc(4)	-0.166109	0.517877970944257	0.115691052274908	-0.61153	-0.305489	>tr|A0A5F9CAP0|A0A5F9CAP0_RABIT Uncharacterized protein OS=Oryctolagus cuniculus OX=9986 PE=4 SV=1
2	K.VYSLSWGEVNLLSN[+2206.813]C[+57.021]SK.F-Fuc(4)Hex(5)HexNAc(4)	-6.40021	-0.435018	0.593173151808632	-5.63752	-0.758977	>tr|A0A5F9CAP0|A0A5F9CAP0_RABIT Uncharacterized protein OS=Oryctolagus cuniculus OX=9986 PE=4 SV=1
2	K.YLN[+2204.772]ETQQLTPELK.S-NeuAc(2)Hex(5)HexNAc(4)	0.441882944985142	1.44812035562909	1.58644842274053	0.850511271251207	0.943395056186708	>tr|A0A5F9DI97|A0A5F9DI97_RABIT Uncharacterized protein OS=Oryctolagus cuniculus OX=9986 PE=3 SV=1
2	K.YN[+1913.677]ITLK.W-NeuAc(1)Hex(5)HexNAc(4)	0.188906588243672	1.04471768845172	0.641646229598049	-0.261715	-0.00883865	>tr|A0A5F9CG95|A0A5F9CG95_RABIT Uncharacterized protein OS=Oryctolagus cuniculus OX=9986 PE=4 SV=1
2	R.ADLSFDVEASNLENPEDVIISC[+57.021]EVFNFEEHGN[+2204.772]ISGFRPHLGK.T-NeuAc(2)Hex(5)HexNAc(4)	-5.75941	2.64374430846212	1.04455191769061	-5.76303	-0.0138631	>tr|G1U754|G1U754_RABIT Histidine-rich glycoprotein OS=Oryctolagus cuniculus OX=9986 GN=HRG PE=4 SV=3
2	R.ADLSFDVEASNLENPEDVIISC[+57.021]EVFNFEEHGN[+2206.813]ISGFRPHLGK.T-Fuc(4)Hex(5)HexNAc(4)	-6.07536	0.186306104188603	-0.866483	-6.14433	-5.89261	>tr|G1U754|G1U754_RABIT Histidine-rich glycoprotein OS=Oryctolagus cuniculus OX=9986 GN=HRG PE=4 SV=3
2	R.AFHYN[+2204.772]VSSHGC[+57.021]QLLPWTQNSPYTR.L-NeuAc(2)Hex(5)HexNAc(4)	-0.557013	0.0813955262550899	-0.299481	-0.61153	-0.721466	>tr|A0A5F9C402|A0A5F9C402_RABIT Macrophage stimulating 1 OS=Oryctolagus cuniculus OX=9986 GN=MST1 PE=4 SV=1
2	R.AKN[+1913.677]NSIWYK.L-NeuAc(1)Hex(5)HexNAc(4)	-5.74334	-0.745832	-0.852159	-5.71153	-5.46665	>tr|A0A5F9CG95|A0A5F9CG95_RABIT Uncharacterized protein OS=Oryctolagus cuniculus OX=9986 PE=4 SV=1
2	R.ALGFQN[+1913.677]ATEALGR.A-NeuAc(1)Hex(5)HexNAc(4)	-0.629762	0.447481174915263	0.0658091268458056	-0.79502	-0.70885	>tr|G1TFU9|G1TFU9_RABIT Galectin-3-binding protein OS=Oryctolagus cuniculus OX=9986 GN=LGALS3BP PE=4 SV=2
2	R.ALGFQN[+2350.830]ATEALGR.A-NeuAc(2)Fuc(1)Hex(5)HexNAc(4)	-6.28756	-0.745832	0.0658091268458056	-6.4758	-6.02582	>tr|G1TFU9|G1TFU9_RABIT Galectin-3-binding protein OS=Oryctolagus cuniculus OX=9986 GN=LGALS3BP PE=4 SV=2
2	R.ALVEVYNMMSWPGDVPPEGWN[+2204.772]R.T-NeuAc(2)Hex(5)HexNAc(4)	-6.04225	1.32567774378053	-0.837983	-0.163202	-5.84072	>tr|G1SS69|G1SS69_RABIT C3/C5 convertase OS=Oryctolagus cuniculus OX=9986 PE=4 SV=2
2	R.ANEANYNSAATTDEQGLVQFSIN[+1913.677]TTNVMGTSLTVR.A-NeuAc(1)Hex(5)HexNAc(4)	-5.79997	0.593835682610055	0.411902391297678	-6.35747	0.259028539628061	>tr|G1SQ70|G1SQ70_RABIT Alpha-2-macroglobulin OS=Oryctolagus cuniculus OX=9986 GN=A2M PE=3 SV=3
2	R.ANEANYNSAATTDEQGLVQFSIN[+1914.697]TTNVMGTSLTVR.A-Fuc(2)Hex(5)HexNAc(4)	-5.95061	-0.1967	-0.299481	-6.0994	-0.684957	>tr|G1SQ70|G1SQ70_RABIT Alpha-2-macroglobulin OS=Oryctolagus cuniculus OX=9986 GN=A2M PE=3 SV=3
2	R.ANEANYNSAATTDEQGLVQFSIN[+1971.719]TTNVMGTSLTVR.A-Fuc(1)Hex(5)HexNAc(5)	-5.46554	-0.1967	0.0658091268458056	-5.84978	-5.81545	>tr|G1SQ70|G1SQ70_RABIT Alpha-2-macroglobulin OS=Oryctolagus cuniculus OX=9986 GN=A2M PE=3 SV=3
2	R.ANEANYNSAATTDEQGLVQFSIN[+2262.814]TTNVMGTSLTVR.A-NeuAc(1)Fuc(1)Hex(5)HexNAc(5)	-6.10131	-0.745832	-0.837983	-5.92283	-6.26427	>tr|G1SQ70|G1SQ70_RABIT Alpha-2-macroglobulin OS=Oryctolagus cuniculus OX=9986 GN=A2M PE=3 SV=3
2	R.C[+57.021]EELHLHAEN[+2262.814]LSRR.V-NeuAc(1)Fuc(1)Hex(5)HexNAc(5)	-5.97785	0.527265140466286	-0.361877	-5.69595	-5.91372	>tr|A0A5F9CWK1|A0A5F9CWK1_RABIT Ubiquitin specific peptidase 34 OS=Oryctolagus cuniculus OX=9986 GN=USP34 PE=4 SV=1
2	R.DTGN[+2059.735]HTVC[+57.021]QEDLC[+57.021]C[+57.021]HLTYK.M-NeuAc(1)Fuc(1)Hex(5)HexNAc(4)	-6.15039	-0.784926	-0.28996	-6.06224	-6.77629	>tr|A0A5F9D1G8|A0A5F9D1G8_RABIT CN hydrolase domain-containing protein OS=Oryctolagus cuniculus OX=9986 PE=3 SV=1
2	R.EALAIVFFGAQPQPN[+1378.476]VSELLVGPLPHPSYMR.D-Hex(6)HexNAc(2)	-0.629762	0.260212442076787	0.411902391297678	-0.242912	-0.0138631	>tr|A0A5F9DJG6|A0A5F9DJG6_RABIT Amine oxidase OS=Oryctolagus cuniculus OX=9986 GN=AOC3 PE=3 SV=1
2	R.EGDSTFLEVAEAGPDGQATFPVHQAGN[+2206.813]YSC[+57.021]SYR.T-Fuc(4)Hex(5)HexNAc(4)	-6.20529	0.260212442076787	-0.837983	-5.59568	-6.29654	>tr|G1SYM4|G1SYM4_RABIT Alpha-1B-glycoprotein OS=Oryctolagus cuniculus OX=9986 GN=A1BG PE=4 SV=2
2	R.EGHFYYN[+2076.750]ISDVK.V-Fuc(2)Hex(6)HexNAc(4)	-6.14646	-0.435018	-0.361877	-5.96924	-6.09589	>tr|Q8WMQ5|Q8WMQ5_RABIT Phospholipid transfer protein OS=Oryctolagus cuniculus OX=9986 GN=PLTP PE=2 SV=1
2	R.EIC[+57.021]EEQVNSLAASIN[+2204.772]K.S-NeuAc(2)Hex(5)HexNAc(4)	3.6010710022015	4.09431739040997	4.24885546864143	3.08915537247142	3.75289726923375	>tr|G1STJ4|G1STJ4_RABIT Complement C3 alpha chain OS=Oryctolagus cuniculus OX=9986 PE=4 SV=3
2	R.EN[+1403.507]ISDPTSPLR.T-Fuc(1)Hex(4)HexNAc(3)	-6.01011	-0.435018	0.471360960255299	-6.11829	-6.43849	>sp|P23108|IGJ_RABIT Immunoglobulin J chain OS=Oryctolagus cuniculus OX=9986 GN=JCHAIN PE=1 SV=1
2	R.EN[+1663.608]ISDPTSPLR.T-Hex(4)HexNAc(5)	-0.166109	0.527265140466286	0.593173151808632	-0.755305	-0.684957	>sp|P23108|IGJ_RABIT Immunoglobulin J chain OS=Oryctolagus cuniculus OX=9986 GN=JCHAIN PE=1 SV=1
2	R.EN[+2116.756]ISDPTSPLR.T-NeuAc(1)Hex(5)HexNAc(5)	-0.629762	0.253957014626389	0.0658091268458056	-0.835796	-0.305489	>sp|P23108|IGJ_RABIT Immunoglobulin J chain OS=Oryctolagus cuniculus OX=9986 GN=JCHAIN PE=1 SV=1
2	R.EN[+2133.772]ISDPTSPLR.T-Fuc(1)Hex(6)HexNAc(5)	-6.00385	-0.745832	-0.299481	-0.755305	-5.58429	>sp|P23108|IGJ_RABIT Immunoglobulin J chain OS=Oryctolagus cuniculus OX=9986 GN=JCHAIN PE=1 SV=1
2	R.ESN[+2204.772]TTNIFFSPVSIALAFAMLSLGAK.G-NeuAc(2)Hex(5)HexNAc(4)	-0.778432	1.09100632500697	0.593173151808632	-0.61153	-0.305489	>tr|Q28666|Q28666_RABIT Alpha-1-antitrypsin OS=Oryctolagus cuniculus OX=9986 PE=2 SV=1
2	R.FGYILHTDN[+1548.545]R.T-NeuAc(1)Hex(4)HexNAc(3)	-6.43853	-0.435018	-0.866483	-6.07757	-5.63672	>tr|G1U128|G1U128_RABIT Mannan binding lectin serine peptidase 1 OS=Oryctolagus cuniculus OX=9986 GN=MASP1 PE=4 SV=3
2	R.FGYILHTDN[+1622.582]R.T-Hex(5)HexNAc(4)	-6.29544	-0.435018	-0.579538	-6.31929	-6.04965	>tr|G1U128|G1U128_RABIT Mannan binding lectin serine peptidase 1 OS=Oryctolagus cuniculus OX=9986 GN=MASP1 PE=4 SV=3
2	R.FGYILHTDN[+1913.677]R.T-NeuAc(1)Hex(5)HexNAc(4)	-0.629762	0.0083177492261381	-0.313519	-0.755305	-0.672672	>tr|G1U128|G1U128_RABIT Mannan binding lectin serine peptidase 1 OS=Oryctolagus cuniculus OX=9986 GN=MASP1 PE=4 SV=3
2	R.FHFPENLHIN[+2206.813]STEC[+57.021]LNVR.C-Fuc(4)Hex(5)HexNAc(4)	-6.07667	0.527265140466286	-0.579538	-5.921	-0.660497	>tr|A0A5F9CAP0|A0A5F9CAP0_RABIT Uncharacterized protein OS=Oryctolagus cuniculus OX=9986 PE=4 SV=1
2	R.FKPTLSQQQQAAGQPDTALN[+1872.651]GSFIIR.Y-NeuAc(1)Hex(6)HexNAc(3)	-5.6894	-0.209757	-0.837983	-6.07407	-5.68016	>tr|G1TY29|G1TY29_RABIT Uncharacterized protein OS=Oryctolagus cuniculus OX=9986 GN=ITIH4 PE=4 SV=2
2	R.FN[+1054.370]GSVSFFR.G-Hex(4)HexNAc(2)	-6.00301	-0.784926	-0.313519	-5.91753	-5.80613	>tr|G1T8V2|G1T8V2_RABIT Microfibril associated protein 4 OS=Oryctolagus cuniculus OX=9986 GN=MFAP4 PE=4 SV=2
2	R.FN[+1702.581]GSVSFFR.G-Hex(8)HexNAc(2)	-0.629762	0.0813955262550899	0.289654956301696	-0.657968	-0.305489	>tr|G1T8V2|G1T8V2_RABIT Microfibril associated protein 4 OS=Oryctolagus cuniculus OX=9986 GN=MFAP4 PE=4 SV=2
2	R.FN[+1710.598]GSVSFFR.G-NeuAc(1)Hex(5)HexNAc(3)	-6.21567	0.0884737366968349	0.0658091268458056	-5.95912	-0.758977	>tr|G1T8V2|G1T8V2_RABIT Microfibril associated protein 4 OS=Oryctolagus cuniculus OX=9986 GN=MFAP4 PE=4 SV=2
2	R.FN[+1864.634]GSVSFFR.G-Hex(9)HexNAc(2)	-6.0017	-0.435018	-0.668729	-5.63987	-6.26747	>tr|G1T8V2|G1T8V2_RABIT Microfibril associated protein 4 OS=Oryctolagus cuniculus OX=9986 GN=MFAP4 PE=4 SV=2
2	R.FTC[+57.021]SVAHTPSATHTN[+2278.809]K.T-NeuAc(1)Hex(6)HexNAc(5)	-5.90789	-0.435018	-0.361877	-5.30178	-5.89653	>tr|A0A5F9DLH0|A0A5F9DLH0_RABIT Uncharacterized protein OS=Oryctolagus cuniculus OX=9986 PE=4 SV=1
2	R.GDVDYHLYPHVLGLNPN[+2204.772]ASTGQEALSQTTISWTPFQESSEYIISC[+57.021]HPVGTDEQPLQFR.V-NeuAc(2)Hex(5)HexNAc(4)	-5.55681	-0.765241	0.660496472425597	-5.78529	-5.99474	>tr|A0A5F9CJW0|A0A5F9CJW0_RABIT Fibronectin OS=Oryctolagus cuniculus OX=9986 GN=FN1 PE=4 SV=1
2	R.GGNSNGALC[+57.021]HFPFLYNNHN[+1548.545]YTDC[+57.021]TSEGR.R-NeuAc(1)Hex(4)HexNAc(3)	-6.0162	-0.745832	0.0870922090334206	-6.39328	-6.04192	>tr|A0A5F9CPW4|A0A5F9CPW4_RABIT Fibronectin OS=Oryctolagus cuniculus OX=9986 GN=FN1 PE=4 SV=1
2	R.GGNSNGALC[+57.021]HFPFLYNNHN[+1622.582]YTDC[+57.021]TSEGR.R-Hex(5)HexNAc(4)	-6.20044	-0.784926	0.115691052274908	-6.29425	-5.6963	>tr|A0A5F9CPW4|A0A5F9CPW4_RABIT Fibronectin OS=Oryctolagus cuniculus OX=9986 GN=FN1 PE=4 SV=1
2	R.GGNSNGALC[+57.021]HFPFLYNNHN[+2059.735]YTDC[+57.021]TSEGR.R-NeuAc(1)Fuc(1)Hex(5)HexNAc(4)	-6.36167	0.779072688077658	0.165555184242304	-0.835796	-6.14059	>tr|A0A5F9CPW4|A0A5F9CPW4_RABIT Fibronectin OS=Oryctolagus cuniculus OX=9986 GN=FN1 PE=4 SV=1
2	R.GIFFDKN[+2457.877]VSMSSEC[+57.021]STTPSPGIQVFPIAPSFADTFLSK.S-Fuc(1)Hex(8)HexNAc(5)	-6.40163	-0.745832	0.115691052274908	-0.755305	-6.4157	>sp|P03988|IGHM_RABIT Ig mu chain C region secreted form OS=Oryctolagus cuniculus OX=9986 PE=2 SV=1
2	R.GIISALLAPPETEEATQELFLDTVYGN[+1702.581]C[+57.021]STHVTVK.T-Hex(8)HexNAc(2)	-6.01752	-0.646255	0.101465570935514	-5.62848	-5.89302	>tr|G1U9R4|G1U9R4_RABIT Apolipoprotein B OS=Oryctolagus cuniculus OX=9986 GN=APOB PE=4 SV=2
2	R.GLN[+3007.058]LTDDAYAPR.I-NeuAc(3)Fuc(1)Hex(6)HexNAc(5)	-6.17161	-0.784926	0.395844731433931	-5.30977	-5.83247	>tr|G1TFU9|G1TFU9_RABIT Galectin-3-binding protein OS=Oryctolagus cuniculus OX=9986 GN=LGALS3BP PE=4 SV=2
2	R.GN[+2861.000]VTQDAQSSDDFTR.I-NeuAc(3)Hex(6)HexNAc(5)	-6.1786	0.739819230124211	-0.837983	-5.33652	-5.73258	>tr|G1U9U2|G1U9U2_RABIT Christmas factor OS=Oryctolagus cuniculus OX=9986 GN=F9 PE=4 SV=1
2	R.HAQDAGVVC[+57.021]TN[+2350.830]ETR.S-NeuAc(2)Fuc(1)Hex(5)HexNAc(4)	-6.16669	0.455641758923328	-0.852159	-6.25583	-6.02411	>tr|G1TFU9|G1TFU9_RABIT Galectin-3-binding protein OS=Oryctolagus cuniculus OX=9986 GN=LGALS3BP PE=4 SV=2
2	R.HC[+57.021]EN[+2756.989]K.T-NeuAc(2)Fuc(1)Hex(5)HexNAc(6)	-6.23882	-0.435018	-0.837983	-5.67367	-6.54316	>tr|G1U0E3|G1U0E3_RABIT Uncharacterized protein OS=Oryctolagus cuniculus OX=9986 PE=4 SV=3
2	R.HEEGHMLN[+2262.814]C[+57.021]TC[+57.021]FGQGR.G-NeuAc(1)Fuc(1)Hex(5)HexNAc(5)	-5.81568	-0.784926	-0.313519	-5.56302	-5.99087	>tr|A0A5F9CPW4|A0A5F9CPW4_RABIT Fibronectin OS=Oryctolagus cuniculus OX=9986 GN=FN1 PE=4 SV=1
2	R.HHGGLDN[+2861.000]DSVLNSSTK.E-NeuAc(3)Hex(6)HexNAc(5)	-6.24882	-0.784926	-0.361877	-6.12552	-5.80868	>tr|A0A5F9DND9|A0A5F9DND9_RABIT Coagulation factor V OS=Oryctolagus cuniculus OX=9986 GN=F5 PE=3 SV=1
2	R.HN[+1913.677]QSC[+57.021]EQC[+57.021]QTLAVR.S-NeuAc(1)Hex(5)HexNAc(4)	-6.04519	-0.280872	-0.866483	-0.576258	-6.13936	>tr|A0A5F9DNQ4|A0A5F9DNQ4_RABIT Coagulation factor XII OS=Oryctolagus cuniculus OX=9986 GN=F12 PE=4 SV=1
2	R.HYYIAAEETIWDYAPSGVDTFTHEN[+1914.697]LTAPGSASEVFFEQGPTR.I-Fuc(2)Hex(5)HexNAc(4)	-6.37464	-0.784926	-0.361877	-5.63251	-6.32366	>tr|G1SJX3|G1SJX3_RABIT Ceruloplasmin OS=Oryctolagus cuniculus OX=9986 GN=CP PE=3 SV=1
2	R.IAPSLAEFALSLYREVAHESN[+2204.772]TTNIFFSPVSIALAFAMLSLGAK.G-NeuAc(2)Hex(5)HexNAc(4)	-5.94632	-0.784926	-0.579538	-0.755305	-6.10355	>tr|G1TGM8|G1TGM8_RABIT SERPIN domain-containing protein OS=Oryctolagus cuniculus OX=9986 GN=SERPINA1 PE=3 SV=1
2	R.IVSVDVNFHPVN[+2059.735]ETVSLITNPKK.N-NeuAc(1)Fuc(1)Hex(5)HexNAc(4)	-5.5274	-0.745832	-0.866483	-6.17104	-6.60901	>tr|A0A5F9C1C5|A0A5F9C1C5_RABIT Uncharacterized protein OS=Oryctolagus cuniculus OX=9986 PE=3 SV=1
2	R.IVSVDVNFHPVN[+2553.910]ETVSLITNPKK.N-NeuAc(2)Fuc(1)Hex(5)HexNAc(5)	-5.86287	-0.1967	-0.189594	-5.65469	-6.63005	>tr|A0A5F9C1C5|A0A5F9C1C5_RABIT Uncharacterized protein OS=Oryctolagus cuniculus OX=9986 PE=3 SV=1
2	R.IVSVDVNFHPVN[+2569.905]ETVSLITNPKK.N-NeuAc(2)Hex(6)HexNAc(5)	-6.39123	-0.765241	-0.837983	-5.94292	-5.81379	>tr|A0A5F9C1C5|A0A5F9C1C5_RABIT Uncharacterized protein OS=Oryctolagus cuniculus OX=9986 PE=3 SV=1
2	R.KMEITDEVQGVLLQTFLN[+2204.772]DTSPVDKR.L-NeuAc(2)Hex(5)HexNAc(4)	-5.92246	-0.0960327	0.0870922090334206	-6.1643	-5.94073	>tr|G1U9R4|G1U9R4_RABIT Apolipoprotein B OS=Oryctolagus cuniculus OX=9986 GN=APOB PE=4 SV=2
2	R.LC[+57.021]PPPPQIPHAQN[+2457.877]MTTTVNYQDGEK.V-Fuc(1)Hex(8)HexNAc(5)	-6.22297	-0.765241	-0.837983	-6.20783	-6.67446	>tr|G1SEL1|G1SEL1_RABIT Complement factor H related 5 OS=Oryctolagus cuniculus OX=9986 GN=CFHR5 PE=4 SV=2
2	R.LDSFAN[+1913.677]YSHC[+57.021]GDC[+57.021]GEGAADK.T-NeuAc(1)Hex(5)HexNAc(4)	-6.24506	-0.581775	-0.668729	-6.17832	-5.83859	>tr|G1SYK4|G1SYK4_RABIT Uncharacterized protein OS=Oryctolagus cuniculus OX=9986 PE=4 SV=2
2	R.LDSFAN[+3517.228]YSHC[+57.021]GDC[+57.021]GEGAADK.T-NeuAc(4)Hex(7)HexNAc(6)	-6.24818	-0.1967	-0.866483	-6.37331	-5.99536	>tr|G1SYK4|G1SYK4_RABIT Uncharacterized protein OS=Oryctolagus cuniculus OX=9986 PE=4 SV=2
2	R.LLANHASQN[+1378.476]ITYHC[+57.021]K.N-Hex(6)HexNAc(2)	-5.982	0.0157761487075127	-0.319969	-0.416012	-5.6749	>sp|Q28668|CO1A2_RABIT Collagen alpha-2(I) chain (Fragment) OS=Oryctolagus cuniculus OX=9986 GN=COL1A2 PE=2 SV=1
2	R.LLANHASQN[+1702.581]ITYHC[+57.021]K.N-Hex(8)HexNAc(2)	-0.2205	0.561981483799553	0.101465570935514	-0.416012	-0.721466	>tr|G1T2Z5|G1T2Z5_RABIT Collagen alpha-2(I) chain OS=Oryctolagus cuniculus OX=9986 GN=COL1A2 PE=4 SV=1
2	R.LMSTEASQN[+1378.476]ITYHC[+57.021]K.N-Hex(6)HexNAc(2)	-6.24206	-0.646255	-0.313519	-6.07524	-6.09458	>tr|Q6GVI2|Q6GVI2_RABIT Prepro-alpha-1 collagen type I (Fragment) OS=Oryctolagus cuniculus OX=9986 PE=2 SV=1
2	R.LNDFN[+1872.651]C[+57.021]TTSSVSSALANTK.D-NeuAc(1)Hex(6)HexNAc(3)	-6.27358	-0.784926	-0.837983	-5.52477	-6.2218	>tr|G1U754|G1U754_RABIT Histidine-rich glycoprotein OS=Oryctolagus cuniculus OX=9986 GN=HRG PE=4 SV=3
2	R.LPGNYHFQFDVELQHC[+57.021]N[+1913.677]VTVWLK.K-NeuAc(1)Hex(5)HexNAc(4)	-5.73247	-0.784926	-0.28996	-5.97016	-5.80249	>tr|G1TZA1|G1TZA1_RABIT C1q domain-containing protein OS=Oryctolagus cuniculus OX=9986 PE=4 SV=2
2	R.LPGNYHFQFDVELQHC[+57.021]N[+1914.697]VTVWLK.K-Fuc(2)Hex(5)HexNAc(4)	-5.60124	-0.784926	-0.837983	-6.28807	-6.42544	>tr|G1TZA1|G1TZA1_RABIT C1q domain-containing protein OS=Oryctolagus cuniculus OX=9986 PE=4 SV=2
2	R.N[+1913.677]LSC[+57.021]VVLR.L-NeuAc(1)Hex(5)HexNAc(4)	-6.06746	-0.784926	-0.837983	-5.92446	-6.56946	>tr|G1SQG6|G1SQG6_RABIT SERPIN domain-containing protein OS=Oryctolagus cuniculus OX=9986 PE=3 SV=3
2	R.N[+1913.677]STQHGHESTR.C-NeuAc(1)Hex(5)HexNAc(4)	-0.663772	0.639470017629813	1.19688262320454	-0.79502	-0.299272	>tr|G1TVS4|G1TVS4_RABIT Hemopexin OS=Oryctolagus cuniculus OX=9986 GN=TRIM3 PE=3 SV=2
2	R.N[+2204.772]STQHGHESTR.C-NeuAc(2)Hex(5)HexNAc(4)	0.77221914072748	1.45607902596918	1.68001942161846	-0.0150889	0.448305087946718	>tr|G1TVS4|G1TVS4_RABIT Hemopexin OS=Oryctolagus cuniculus OX=9986 GN=TRIM3 PE=3 SV=2
2	R.N[+2407.852]YTLTGMDSC[+57.021]AVPAAVQK.A-NeuAc(2)Hex(5)HexNAc(5)	-5.59693	-0.0960327	0.115691052274908	-6.85989	-6.07133	>tr|A0A5F9DPA2|A0A5F9DPA2_RABIT Caspase recruitment domain family member 6 OS=Oryctolagus cuniculus OX=9986 GN=CARD6 PE=3 SV=1
2	R.N[+2569.905]STQHGHESTR.C-NeuAc(2)Hex(6)HexNAc(5)	-6.30132	0.527265140466286	-0.319969	-5.85541	-6.06453	>tr|G1TVS4|G1TVS4_RABIT Hemopexin OS=Oryctolagus cuniculus OX=9986 GN=TRIM3 PE=3 SV=2
2	R.N[+3517.228]HTHPLKPEIQPFPQVASER.C-NeuAc(4)Hex(7)HexNAc(6)	-0.667458	0.315478223114547	0.817789279320749	-0.190043	-0.721466	>tr|G1U754|G1U754_RABIT Histidine-rich glycoprotein OS=Oryctolagus cuniculus OX=9986 GN=HRG PE=4 SV=3
2	R.NC[+57.021]N[+2204.772]DSDVLSVSGFALQDINR.D-NeuAc(2)Hex(5)HexNAc(4)	1.0476355564619	2.15669400100378	3.19833115346207	0.24216523277491	1.50073180238698	>tr|G1SEK8|G1SEK8_RABIT Fetuin B OS=Oryctolagus cuniculus OX=9986 GN=FETUB PE=4 SV=2
2	R.PFYLTN[+2204.772]ATGQL.--NeuAc(2)Hex(5)HexNAc(4)	-5.85573	0.176398772369551	-0.866483	-5.85355	-6.2026	>tr|G1TFU9|G1TFU9_RABIT Galectin-3-binding protein OS=Oryctolagus cuniculus OX=9986 GN=LGALS3BP PE=4 SV=2
2	R.PHTAVDSELPPN[+1954.704]VSVFIPPR.D-NeuAc(1)Hex(4)HexNAc(5)	0.068185030390897	1.47008738138819	1.61968110313652	0.24216523277491	0.23474581120806	>tr|G1TK85|G1TK85_RABIT Immunoglobulin heavy constant mu OS=Oryctolagus cuniculus OX=9986 GN=IGHM PE=4 SV=2
2	R.QEPPSVTASSHMAPGQN[+1913.677]R.T-NeuAc(1)Hex(5)HexNAc(4)	-0.778432	-0.271699	0.101465570935514	-0.416012	-0.660497	>tr|G1TN25|G1TN25_RABIT Alpha-2-glycoprotein 1, zinc-binding OS=Oryctolagus cuniculus OX=9986 GN=AZGP1 PE=3 SV=3
2	R.QGC[+57.021]APGSQKN[+2352.846]SSLC[+57.021]ELC[+57.021]IGPSVC[+57.021]APNNR.E-Hex(7)HexNAc(6)	-6.45318	-0.784926	-0.866483	-6.21133	-6.12042	>tr|G1STF7|G1STF7_RABIT Beta-1 metal-binding globulin OS=Oryctolagus cuniculus OX=9986 PE=3 SV=1
2	R.QVPGLHN[+2204.772]GTK.A-NeuAc(2)Hex(5)HexNAc(4)	-5.79255	-0.745832	-0.591287	-5.57834	-6.27655	>tr|G1TC91|G1TC91_RABIT Neural EGFL like 2 OS=Oryctolagus cuniculus OX=9986 GN=NELL2 PE=4 SV=3
2	R.RNIN[+2204.772]YTER.G-NeuAc(2)Hex(5)HexNAc(4)	-5.71102	-0.765241	-0.866483	-5.92715	-5.70886	>tr|G1SD43|G1SD43_RABIT Glycosyl-phosphatidylinositol-specific phospholipase D OS=Oryctolagus cuniculus OX=9986 GN=GPLD1 PE=3 SV=3
2	R.RPTGEVYELEIDTLETTC[+57.021]HALDPTPLAN[+1914.697]C[+57.021]SVR.Q-Fuc(2)Hex(5)HexNAc(4)	-5.05381	0.0202708759387374	0.0870922090334206	-5.90725	-0.660497	>tr|U3KMR2|U3KMR2_RABIT Alpha-2-HS-glycoprotein OS=Oryctolagus cuniculus OX=9986 GN=AHSG PE=4 SV=1
2	R.SDHVN[+1702.581]R.T-Hex(8)HexNAc(2)	1.14162525529339	2.33091532231301	2.69375872994516	-0.79502	1.81987517951276	>tr|G1SQ70|G1SQ70_RABIT Alpha-2-macroglobulin OS=Oryctolagus cuniculus OX=9986 GN=A2M PE=3 SV=3
2	R.SDHVN[+1702.581]RTEVSTNHVLIYLDK.V-Hex(8)HexNAc(2)	-5.76333	-0.191466	1.02419691140189	-6.61009	-6.38227	>tr|G1SQ70|G1SQ70_RABIT Alpha-2-macroglobulin OS=Oryctolagus cuniculus OX=9986 GN=A2M PE=3 SV=3
2	R.SDHVN[+1864.634]RTEVSTNHVLIYLDK.V-Hex(9)HexNAc(2)	-5.83273	0.0813955262550899	0.371025325615321	-5.78777	-0.684957	>tr|G1SQ70|G1SQ70_RABIT Alpha-2-macroglobulin OS=Oryctolagus cuniculus OX=9986 GN=A2M PE=3 SV=3
2	R.SGFGSGWTQLSNLLEVTEDGSLPPPLLSVEPVSWITPGLN[+2204.772]ITLLC[+57.021]QGAR.Q-NeuAc(2)Hex(5)HexNAc(4)	-6.10537	-0.784926	-0.837983	-6.23515	-6.27583	>tr|G1SYM4|G1SYM4_RABIT Alpha-1B-glycoprotein OS=Oryctolagus cuniculus OX=9986 GN=A1BG PE=4 SV=2
2	R.SVN[+2350.830]MTC[+57.021]SSYGLPAPK.I-NeuAc(2)Fuc(1)Hex(5)HexNAc(4)	-6.16573	-0.581775	-0.837983	-5.32419	-5.84657	>tr|A0A5F9CF37|A0A5F9CF37_RABIT Uncharacterized protein OS=Oryctolagus cuniculus OX=9986 GN=VCAM1 PE=4 SV=1
2	R.SWPAVGN[+1257.449]C[+57.021]TSALR.W-Hex(4)HexNAc(3)	-5.73719	-0.745832	-0.361877	-5.8673	-5.5667	>tr|G1TVS4|G1TVS4_RABIT Hemopexin OS=Oryctolagus cuniculus OX=9986 GN=TRIM3 PE=3 SV=2
2	R.SWPAVGN[+2245.799]C[+57.021]TSALR.W-NeuAc(2)Hex(4)HexNAc(5)	-6.30391	-0.784926	-0.837983	-5.7281	-5.71861	>tr|G1TVS4|G1TVS4_RABIT Hemopexin OS=Oryctolagus cuniculus OX=9986 GN=TRIM3 PE=3 SV=2
2	R.SWPAVGN[+2247.840]C[+57.021]TSALR.W-Fuc(4)Hex(4)HexNAc(5)	-6.20395	-0.784926	-0.361877	-5.96013	-5.88687	>tr|G1TVS4|G1TVS4_RABIT Hemopexin OS=Oryctolagus cuniculus OX=9986 GN=TRIM3 PE=3 SV=2
2	R.SWPAVGN[+2350.830]C[+57.021]TSALR.W-NeuAc(2)Fuc(1)Hex(5)HexNAc(4)	-0.2205	0.606654261236298	0.84471840649764	0.154581324850378	-0.323803	>tr|G1TVS4|G1TVS4_RABIT Hemopexin OS=Oryctolagus cuniculus OX=9986 GN=TRIM3 PE=3 SV=2
2	R.SWPAVGN[+2569.905]C[+57.021]TSALR.W-NeuAc(2)Hex(6)HexNAc(5)	-0.667458	0.73173516989819	1.67026790315774	0.221622246184235	0.0057244580162851	>tr|G1TVS4|G1TVS4_RABIT Hemopexin OS=Oryctolagus cuniculus OX=9986 GN=TRIM3 PE=3 SV=2
2	R.TEVSTNHVLIYLDKVSN[+1913.677]QTLSLSFTVVQDIPVIDLKPAIVK.V-NeuAc(1)Hex(5)HexNAc(4)	-5.59139	-0.765241	-0.837983	-6.26738	-5.85668	>tr|G1SQ70|G1SQ70_RABIT Alpha-2-macroglobulin OS=Oryctolagus cuniculus OX=9986 GN=A2M PE=3 SV=3
2	R.TEVSTNHVLIYLDKVSN[+1913.677]QTLSLSFTVVQEIPVIDLKPAIVK.V-NeuAc(1)Hex(5)HexNAc(4)	-6.1082	-0.209757	-0.319969	-5.77603	-6.14002	>tr|A0A5F9CQC0|A0A5F9CQC0_RABIT Alpha-2-macroglobulin OS=Oryctolagus cuniculus OX=9986 GN=A2M PE=3 SV=1
2	R.TFQIHVN[+1913.677]ISYTGK.R-NeuAc(1)Hex(5)HexNAc(4)	1.4519407911701	2.79400223685032	2.6804217712209	0.859619015103666	2.30310413330969	>tr|A0A5F9C1C5|A0A5F9C1C5_RABIT Uncharacterized protein OS=Oryctolagus cuniculus OX=9986 PE=3 SV=1
2	R.VDN[+2206.813]STSVSVPMLSGTGTFPHGSDAENNFSMTR.V-Fuc(4)Hex(5)HexNAc(4)	-5.48018	-0.765241	-0.866483	-5.94134	-6.27491	>tr|G1SDD6|G1SDD6_RABIT Angiotensin 1-10 OS=Oryctolagus cuniculus OX=9986 GN=AGT PE=3 SV=3
2	R.VDN[+2262.814]STSVSVPMLSGTGTFPHGSDAENNFSMTR.V-NeuAc(1)Fuc(1)Hex(5)HexNAc(5)	-5.89289	-0.599015	0.0658091268458056	-5.95498	-5.97578	>tr|G1SDD6|G1SDD6_RABIT Angiotensin 1-10 OS=Oryctolagus cuniculus OX=9986 GN=AGT PE=3 SV=3
2	R.VHTGN[+2262.814]VTFYMESSVAEQEEAFR.S-NeuAc(1)Fuc(1)Hex(5)HexNAc(5)	-6.12099	-0.745832	-0.837983	-6.21298	-5.37327	>tr|G1TY29|G1TY29_RABIT Uncharacterized protein OS=Oryctolagus cuniculus OX=9986 GN=ITIH4 PE=4 SV=2
2	R.VPMMSRLGMYVMFHC[+57.021]STLASTVVLMDYKGN[+2059.735]ATALFLLPDEGK.L-NeuAc(1)Fuc(1)Hex(5)HexNAc(4)	-6.11241	-0.745832	-0.837983	-5.85162	-5.83507	>tr|Q28666|Q28666_RABIT Alpha-1-antitrypsin OS=Oryctolagus cuniculus OX=9986 PE=2 SV=1
2	R.VTSFMLEN[+2204.772]GTR.A-NeuAc(2)Hex(5)HexNAc(4)	-0.667458	0.658850499542017	0.0706913138275425	-0.190043	-0.70885	>tr|G1SD43|G1SD43_RABIT Glycosyl-phosphatidylinositol-specific phospholipase D OS=Oryctolagus cuniculus OX=9986 GN=GPLD1 PE=3 SV=3
2	R.YFYN[+1913.677]GSSMAC[+57.021]ETFNYGGC[+57.021]LGNGNNFASEK.E-NeuAc(1)Hex(5)HexNAc(4)	-6.14359	-0.784926	-0.852159	-5.87796	-6.41622	>tr|G1TSY8|G1TSY8_RABIT Alpha-1-microglobulin OS=Oryctolagus cuniculus OX=9986 GN=KIF12 PE=3 SV=2
2	R.YHLN[+1913.677]VTLHSTPEANK.K-NeuAc(1)Hex(5)HexNAc(4)	-6.3502	0.0813955262550899	0.37494182555044	-6.05093	-0.70885	>tr|G1SYK4|G1SYK4_RABIT Uncharacterized protein OS=Oryctolagus cuniculus OX=9986 PE=4 SV=2
2	R.YHLN[+1913.677]VTLHSTPEANKK.G-NeuAc(1)Hex(5)HexNAc(4)	-5.90299	-0.784926	-0.28996	-5.74657	-6.23483	>tr|G1SYK4|G1SYK4_RABIT Uncharacterized protein OS=Oryctolagus cuniculus OX=9986 PE=4 SV=2
2	R.YLYLASN[+2204.772]QSNK.W-NeuAc(2)Hex(5)HexNAc(4)	0.720835297725583	1.16686384381858	1.29815178816546	0.854266703362512	0.458742197523151	>tr|A0A5F9DJG6|A0A5F9DJG6_RABIT Amine oxidase OS=Oryctolagus cuniculus OX=9986 GN=AOC3 PE=3 SV=1
2	R.YQGN[+1914.697]ATALFILPEEGK.M-Fuc(2)Hex(5)HexNAc(4)	-6.78905	-0.765241	-0.361877	-5.99512	-6.06498	>tr|G1SQG6|G1SQG6_RABIT SERPIN domain-containing protein OS=Oryctolagus cuniculus OX=9986 PE=3 SV=3
2	R.YTYILN[+2076.750]ASEEQSPGEGDGNC[+57.021]VTR.I-Fuc(2)Hex(6)HexNAc(4)	-5.92072	-0.435018	0.115691052274908	-5.75487	-6.13402	>tr|A0A5F9CI66|A0A5F9CI66_RABIT Ceruloplasmin OS=Oryctolagus cuniculus OX=9986 GN=CP PE=3 SV=1
3	K.AAAQGLYN[+2861.000]NTYLTAVDEK.I-NeuAc(3)Hex(6)HexNAc(5)	-6.25069	-5.91436	0.101465570935514	-5.92616	-6.00367	>tr|G1U2Q3|G1U2Q3_RABIT Apolipoprotein C-II OS=Oryctolagus cuniculus OX=9986 PE=3 SV=2
3	K.AAVPSALSTN[+2116.756]SSR.G-NeuAc(1)Hex(5)HexNAc(5)	-5.90115	-6.59517	-0.866483	-5.87164	-6.10446	>tr|G1TFU9|G1TFU9_RABIT Galectin-3-binding protein OS=Oryctolagus cuniculus OX=9986 GN=LGALS3BP PE=4 SV=2
3	K.AAVPSALSTN[+2278.809]SSR.G-NeuAc(1)Hex(6)HexNAc(5)	-5.82727	-6.228	-0.668729	-6.29083	-6.49889	>tr|G1TFU9|G1TFU9_RABIT Galectin-3-binding protein OS=Oryctolagus cuniculus OX=9986 GN=LGALS3BP PE=4 SV=2
3	K.AAVPSALSTN[+2350.830]SSR.G-NeuAc(2)Fuc(1)Hex(5)HexNAc(4)	-6.09162	-6.3672	-0.591287	-6.26893	-5.68534	>tr|G1TFU9|G1TFU9_RABIT Galectin-3-binding protein OS=Oryctolagus cuniculus OX=9986 GN=LGALS3BP PE=4 SV=2
3	K.ADDKVLPGERYTYILN[+2498.904]ASEEQSPGEGDGNC[+57.021]VTR.I-Fuc(1)Hex(7)HexNAc(6)	-6.66441	-6.00646	-0.837983	-5.78349	-6.78878	>tr|G1SJX3|G1SJX3_RABIT Ceruloplasmin OS=Oryctolagus cuniculus OX=9986 GN=CP PE=3 SV=1
3	K.AEALC[+57.021]LSN[+1914.697]DTGLGLSPIASLR.A-Fuc(2)Hex(5)HexNAc(4)	-6.01348	-5.7164	-0.361877	-5.95019	-5.82053	>tr|G1TR31|G1TR31_RABIT Uncharacterized protein OS=Oryctolagus cuniculus OX=9986 PE=3 SV=3
3	K.AFEN[+2352.846]VTDLQWLILDHNLLENSK.I-Hex(7)HexNAc(6)	-5.71685	-5.95112	-0.361877	-5.83089	-5.95395	>tr|G1SP97|G1SP97_RABIT Lumican OS=Oryctolagus cuniculus OX=9986 GN=LUM PE=3 SV=1
3	K.AFPEVC[+57.021]N[+1825.661]ETMMALWEEC[+57.021]K.P-Hex(5)HexNAc(5)	-6.59681	-5.23662	-0.361877	-6.52564	-5.87332	>sp|Q9XSC5|CLUS_RABIT Clusterin OS=Oryctolagus cuniculus OX=9986 GN=CLU PE=2 SV=1
3	K.AFPEVC[+57.021]N[+1913.677]ETMMALWEEC[+57.021]KPC[+57.021]LK.Q-NeuAc(1)Hex(5)HexNAc(4)	-5.81405	-5.73384	0.64610645482226	-6.1346	-5.86508	>sp|Q9XSC5|CLUS_RABIT Clusterin OS=Oryctolagus cuniculus OX=9986 GN=CLU PE=2 SV=1
3	K.AFPEVC[+57.021]N[+2262.814]ETMMALWEEC[+57.021]KPC[+57.021]LK.Q-NeuAc(1)Fuc(1)Hex(5)HexNAc(5)	-6.01684	-5.68187	-0.866483	-6.55493	-5.93799	>sp|Q9XSC5|CLUS_RABIT Clusterin OS=Oryctolagus cuniculus OX=9986 GN=CLU PE=2 SV=1
3	K.AFQYVETHGEVC[+57.021]PAN[+2553.910]WTPESPTIK.P-NeuAc(2)Fuc(1)Hex(5)HexNAc(5)	-5.87462	-5.87338	-0.361877	-6.10956	-6.64491	>tr|A0A5F9DAA7|A0A5F9DAA7_RABIT Thioredoxin domain-containing protein OS=Oryctolagus cuniculus OX=9986 PE=4 SV=1
3	K.AHSTFQISMN[+1298.476]LSYTGSRPISNMVIADVKMVSGFIALK.P-Hex(3)HexNAc(4)	-5.8837	-6.4379	-0.837983	-6.38335	-5.85886	>tr|G1SQ70|G1SQ70_RABIT Alpha-2-macroglobulin OS=Oryctolagus cuniculus OX=9986 GN=A2M PE=3 SV=3
3	K.AHSTFQISMN[+1622.582]LSYTGSR.P-Hex(5)HexNAc(4)	-6.01614	-5.98627	-0.591287	-6.21612	-5.86299	>tr|G1SQ70|G1SQ70_RABIT Alpha-2-macroglobulin OS=Oryctolagus cuniculus OX=9986 GN=A2M PE=3 SV=3
3	K.AHSTFQISMN[+2059.735]LSYTGSR.P-NeuAc(1)Fuc(1)Hex(5)HexNAc(4)	-6.04936	-5.98273	-0.866483	-5.84796	-6.29607	>tr|G1SQ70|G1SQ70_RABIT Alpha-2-macroglobulin OS=Oryctolagus cuniculus OX=9986 GN=A2M PE=3 SV=3
3	K.AHSTFQISMN[+3517.228]LSYTGSRPISNMVIADVK.M-NeuAc(4)Hex(7)HexNAc(6)	-5.73567	-6.0716	-0.361877	-6.19847	-5.97248	>tr|G1SQ70|G1SQ70_RABIT Alpha-2-macroglobulin OS=Oryctolagus cuniculus OX=9986 GN=A2M PE=3 SV=3
3	K.AHTSFQISIN[+1872.651]VSYIGSRQVSNMVIVDIK.M-NeuAc(1)Hex(6)HexNAc(3)	-6.18361	-6.06677	-0.852159	-6.02951	-5.99256	>tr|G1TR31|G1TR31_RABIT Uncharacterized protein OS=Oryctolagus cuniculus OX=9986 PE=3 SV=3
3	K.AN[+1216.423]K.S-Hex(5)HexNAc(2)	-6.22298	-5.73187	-0.361877	-5.61735	-6.21761	>tr|G1SIK0|G1SIK0_RABIT Antithrombin-III OS=Oryctolagus cuniculus OX=9986 GN=SERPINC1 PE=3 SV=1
3	K.AN[+2245.799]STDSASYHPLTGDTR.F-NeuAc(2)Hex(4)HexNAc(5)	-6.28023	-6.1509	-0.361877	-6.13851	-6.19564	>tr|G1U9R4|G1U9R4_RABIT Apolipoprotein B OS=Oryctolagus cuniculus OX=9986 GN=APOB PE=4 SV=2
3	K.ASALC[+57.021]LSN[+1913.677]DTGIGLSPIASLQAFQPFFVELTMPYSVIR.G-NeuAc(1)Hex(5)HexNAc(4)	-5.91987	-6.28489	-0.866483	-5.77828	-6.0299	>tr|G1SQ70|G1SQ70_RABIT Alpha-2-macroglobulin OS=Oryctolagus cuniculus OX=9986 GN=A2M PE=3 SV=3
3	K.ASPEQLEEFYEALTC[+57.021]LGMN[+1913.677]K.T-NeuAc(1)Hex(5)HexNAc(4)	-5.78994	-6.30536	0.471360960255299	-6.03031	-5.8263	>sp|P25227|A1AG_RABIT Alpha-1-acid glycoprotein OS=Oryctolagus cuniculus OX=9986 GN=ORM1 PE=2 SV=1
3	K.ASPEQLEEFYEALTC[+57.021]LGMN[+2262.814]K.T-NeuAc(1)Fuc(1)Hex(5)HexNAc(5)	-5.52395	-6.44659	0.84471840649764	-6.1526	-5.71829	>sp|P25227|A1AG_RABIT Alpha-1-acid glycoprotein OS=Oryctolagus cuniculus OX=9986 GN=ORM1 PE=2 SV=1
3	K.ASPEQLEEFYEALTC[+57.021]LGMN[+2350.830]K.T-NeuAc(2)Fuc(1)Hex(5)HexNAc(4)	-5.83245	-6.42181	-0.852159	-6.00788	-5.96475	>sp|P25227|A1AG_RABIT Alpha-1-acid glycoprotein OS=Oryctolagus cuniculus OX=9986 GN=ORM1 PE=2 SV=1
3	K.C[+57.021]C[+57.021]LSLSHLN[+2133.772]ETVTVSASIVSHSGTISLFDDLVADKDLFHC[+57.021]VSFTLPR.S-Fuc(1)Hex(6)HexNAc(5)	-5.95259	-5.81003	-0.852159	-6.54584	-6.363	>tr|G1TR31|G1TR31_RABIT Uncharacterized protein OS=Oryctolagus cuniculus OX=9986 PE=3 SV=3
3	K.C[+57.021]DSTPDSAEDILKLC[+57.021]PDC[+57.021]PLLTPLN[+1710.598]DTR.V-NeuAc(1)Hex(5)HexNAc(3)	-6.19638	-5.50554	-0.837983	-6.18908	-6.39763	>tr|U3KMR2|U3KMR2_RABIT Alpha-2-HS-glycoprotein OS=Oryctolagus cuniculus OX=9986 GN=AHSG PE=4 SV=1
3	K.C[+57.021]IQHYEN[+1095.397]STVPENK.I-Hex(3)HexNAc(3)	-5.46981	-5.84918	-0.668729	-6.11281	-5.71441	>tr|G1SWF6|G1SWF6_RABIT Haptoglobin OS=Oryctolagus cuniculus OX=9986 PE=3 SV=1
3	K.C[+57.021]IQHYEN[+1548.545]STVPENK.I-NeuAc(1)Hex(4)HexNAc(3)	-5.78499	-5.74636	-0.852159	-6.33026	-5.742	>tr|G1SWF6|G1SWF6_RABIT Haptoglobin OS=Oryctolagus cuniculus OX=9986 PE=3 SV=1
3	K.C[+57.021]IQHYEN[+1710.598]STVPENK.I-NeuAc(1)Hex(5)HexNAc(3)	-5.49535	-6.12062	-0.837983	-5.93053	-6.10518	>tr|G1SWF6|G1SWF6_RABIT Haptoglobin OS=Oryctolagus cuniculus OX=9986 PE=3 SV=1
3	K.C[+57.021]IQHYEN[+1751.624]STVPENK.I-NeuAc(1)Hex(4)HexNAc(4)	-6.19072	-5.72294	-0.668729	-6.08786	-6.03923	>tr|G1SWF6|G1SWF6_RABIT Haptoglobin OS=Oryctolagus cuniculus OX=9986 PE=3 SV=1
3	K.C[+57.021]IQHYEN[+1872.651]STVPENK.I-NeuAc(1)Hex(6)HexNAc(3)	-5.57032	-5.68986	-0.866483	-6.5186	-5.77092	>tr|G1SWF6|G1SWF6_RABIT Haptoglobin OS=Oryctolagus cuniculus OX=9986 PE=3 SV=1
3	K.C[+57.021]IQHYEN[+1897.682]STVPENK.I-NeuAc(1)Fuc(1)Hex(4)HexNAc(4)	-6.19521	-6.23974	-0.361877	-6.15305	-6.14817	>tr|G1SWF6|G1SWF6_RABIT Haptoglobin OS=Oryctolagus cuniculus OX=9986 PE=3 SV=1
3	K.C[+57.021]IQHYEN[+2059.735]STVPENK.I-NeuAc(1)Fuc(1)Hex(5)HexNAc(4)	-6.11784	-6.09359	0.194309911906466	-5.89021	-5.66599	>tr|G1SWF6|G1SWF6_RABIT Haptoglobin OS=Oryctolagus cuniculus OX=9986 PE=3 SV=1
3	K.C[+57.021]IQHYEN[+2204.772]STVPENKIPK.S-NeuAc(2)Hex(5)HexNAc(4)	-6.096	-6.26584	0.593173151808632	-6.1936	-5.56231	>tr|G1SWF6|G1SWF6_RABIT Haptoglobin OS=Oryctolagus cuniculus OX=9986 PE=3 SV=1
3	K.C[+57.021]IQHYEN[+2245.799]STVPENKIPK.S-NeuAc(2)Hex(4)HexNAc(5)	-5.85174	-5.51409	-0.866483	-5.64077	-5.80962	>tr|G1SWF6|G1SWF6_RABIT Haptoglobin OS=Oryctolagus cuniculus OX=9986 PE=3 SV=1
3	K.C[+57.021]IQHYEN[+2278.809]STVPENK.I-NeuAc(1)Hex(6)HexNAc(5)	-6.0532	-5.84422	0.0870922090334206	-5.97851	-5.455	>tr|G1SWF6|G1SWF6_RABIT Haptoglobin OS=Oryctolagus cuniculus OX=9986 PE=3 SV=1
3	K.C[+57.021]IQHYEN[+2352.846]STVPENK.I-Hex(7)HexNAc(6)	-5.59709	-6.01675	-0.361877	-6.31091	-6.09608	>tr|G1SWF6|G1SWF6_RABIT Haptoglobin OS=Oryctolagus cuniculus OX=9986 PE=3 SV=1
3	K.C[+57.021]IQHYEN[+2553.910]STVPENK.I-NeuAc(2)Fuc(1)Hex(5)HexNAc(5)	-6.06437	-5.79107	-0.591287	-0.835796	-5.56864	>tr|G1SWF6|G1SWF6_RABIT Haptoglobin OS=Oryctolagus cuniculus OX=9986 PE=3 SV=1
3	K.C[+57.021]IQHYEN[+2715.963]STVPENK.I-NeuAc(2)Fuc(1)Hex(6)HexNAc(5)	-6.03006	-5.98395	-0.361877	-5.90309	-6.57038	>tr|G1SWF6|G1SWF6_RABIT Haptoglobin OS=Oryctolagus cuniculus OX=9986 PE=3 SV=1
3	K.C[+57.021]IQHYEN[+3663.286]STVPENK.I-NeuAc(4)Fuc(1)Hex(7)HexNAc(6)	-6.01129	-6.06242	0.0870922090334206	-5.62419	-5.92512	>tr|G1SWF6|G1SWF6_RABIT Haptoglobin OS=Oryctolagus cuniculus OX=9986 PE=3 SV=1
3	K.C[+57.021]VVPDSIASETN[+1913.677]LSSK.N-NeuAc(1)Hex(5)HexNAc(4)	-6.45552	-5.75234	-0.28996	-6.26292	-5.92972	>tr|A0A5F9CG95|A0A5F9CG95_RABIT Uncharacterized protein OS=Oryctolagus cuniculus OX=9986 PE=4 SV=1
3	K.DVDKEFYLFPTVFDEN[+1403.507]ESLFLDDNIK.M-Fuc(1)Hex(4)HexNAc(3)	-6.32256	-5.88755	-0.361877	-6.37132	-6.11448	>tr|G1SJX3|G1SJX3_RABIT Ceruloplasmin OS=Oryctolagus cuniculus OX=9986 GN=CP PE=3 SV=1
3	K.DVLVSWTHN[+1647.613]GTLVVPK.D-Fuc(1)Hex(3)HexNAc(5)	-6.18638	-6.13917	-0.28996	-5.82066	-6.23992	>tr|G1TYD2|G1TYD2_RABIT Uncharacterized protein OS=Oryctolagus cuniculus OX=9986 PE=4 SV=3
3	K.DVLVSWTHN[+1768.640]GTLVVPK.D-Fuc(1)Hex(5)HexNAc(4)	-6.41533	-6.12795	-0.28996	-5.91034	-6.18512	>tr|G1TYD2|G1TYD2_RABIT Uncharacterized protein OS=Oryctolagus cuniculus OX=9986 PE=4 SV=3
3	K.DVLVSWTHN[+1971.719]GTLVVPK.D-Fuc(1)Hex(5)HexNAc(5)	-5.43921	-6.51093	-0.361877	-6.03304	-6.50825	>tr|G1TYD2|G1TYD2_RABIT Uncharacterized protein OS=Oryctolagus cuniculus OX=9986 PE=4 SV=3
3	K.EDALN[+2569.905]ETR.D-NeuAc(2)Hex(6)HexNAc(5)	-5.68246	-5.76938	-0.866483	-6.05386	-6.47902	>sp|Q9XSC5|CLUS_RABIT Clusterin OS=Oryctolagus cuniculus OX=9986 GN=CLU PE=2 SV=1
3	K.EDALN[+2861.000]ETR.D-NeuAc(3)Hex(6)HexNAc(5)	-5.73407	-6.2236	0.0658091268458056	-5.98355	-5.51863	>sp|Q9XSC5|CLUS_RABIT Clusterin OS=Oryctolagus cuniculus OX=9986 GN=CLU PE=2 SV=1
3	K.EEDFHVN[+2206.813]ATTTVR.V-Fuc(4)Hex(5)HexNAc(4)	-6.07651	-6.14594	-0.837983	-6.15671	-5.6147	>tr|A0A5F9DT67|A0A5F9DT67_RABIT SERPIN domain-containing protein OS=Oryctolagus cuniculus OX=9986 GN=SERPINA1 PE=3 SV=1
3	K.EHEGAIYPDN[+1419.502]TTAFQKADDK.V-Hex(5)HexNAc(3)	-5.96826	-5.62614	-0.361877	-5.85757	-5.83956	>tr|G1SJX3|G1SJX3_RABIT Ceruloplasmin OS=Oryctolagus cuniculus OX=9986 GN=CP PE=3 SV=1
3	K.EHEGAIYPDN[+1825.661]TTAFQK.A-Hex(5)HexNAc(5)	-5.76371	-6.55633	-0.837983	-6.2951	-6.33958	>tr|G1SJX3|G1SJX3_RABIT Ceruloplasmin OS=Oryctolagus cuniculus OX=9986 GN=CP PE=3 SV=1
3	K.EHEGAIYPDN[+1872.651]TTAFQKADDK.V-NeuAc(1)Hex(6)HexNAc(3)	-0.629762	-0.646255	0.638417597040303	-0.154941	-0.700839	>tr|G1SJX3|G1SJX3_RABIT Ceruloplasmin OS=Oryctolagus cuniculus OX=9986 GN=CP PE=3 SV=1
3	K.EHEGAIYPDN[+2245.799]TTAFQK.A-NeuAc(2)Hex(4)HexNAc(5)	-5.63763	-5.68707	-0.591287	-6.01815	-6.26976	>tr|G1SJX3|G1SJX3_RABIT Ceruloplasmin OS=Oryctolagus cuniculus OX=9986 GN=CP PE=3 SV=1
3	K.EHEGAIYPDN[+3007.058]TTAFQK.A-NeuAc(3)Fuc(1)Hex(6)HexNAc(5)	-5.70483	-6.09115	-0.837983	-6.35432	-6.76016	>tr|G1SJX3|G1SJX3_RABIT Ceruloplasmin OS=Oryctolagus cuniculus OX=9986 GN=CP PE=3 SV=1
3	K.EHEGAIYPDN[+714.269]TTAFQKADDK.V-Fuc(1)Hex(1)HexNAc(2)	-6.44018	-5.90458	-0.361877	-6.11165	-5.88455	>tr|G1SJX3|G1SJX3_RABIT Ceruloplasmin OS=Oryctolagus cuniculus OX=9986 GN=CP PE=3 SV=1
3	K.ELHHLQEQN[+1622.582]VSNPFLDKEEFYIGSK.Y-Hex(5)HexNAc(4)	-5.56062	-6.56067	-0.852159	-5.73483	-5.87971	>tr|G1SJX3|G1SJX3_RABIT Ceruloplasmin OS=Oryctolagus cuniculus OX=9986 GN=CP PE=3 SV=1
3	K.ELHHLQEQN[+1622.582]VSNPFLDKEEFYIGSKYK.K-Hex(5)HexNAc(4)	-6.22982	-6.3621	-0.866483	-5.94194	-6.01338	>tr|G1SJX3|G1SJX3_RABIT Ceruloplasmin OS=Oryctolagus cuniculus OX=9986 GN=CP PE=3 SV=1
3	K.ELHHLQEQN[+1913.677]VSNPFLDKEEFYIGSK.Y-NeuAc(1)Hex(5)HexNAc(4)	1.51674942797963	1.61117485391431	2.31068952661305	1.92214328559124	1.66525069593639	>tr|G1SJX3|G1SJX3_RABIT Ceruloplasmin OS=Oryctolagus cuniculus OX=9986 GN=CP PE=3 SV=1
3	K.ELHHLQEQN[+1954.704]VSNPFLDKEEFYIGSK.Y-NeuAc(1)Hex(4)HexNAc(5)	-6.27783	-5.43082	0.0870922090334206	-5.75683	-5.61259	>tr|G1SJX3|G1SJX3_RABIT Ceruloplasmin OS=Oryctolagus cuniculus OX=9986 GN=CP PE=3 SV=1
3	K.ELHHLQEQN[+1955.724]VSNPFLDKEEFYIGSK.Y-Fuc(2)Hex(4)HexNAc(5)	-6.05313	-6.07848	-0.837983	-6.43695	-5.68618	>tr|G1SJX3|G1SJX3_RABIT Ceruloplasmin OS=Oryctolagus cuniculus OX=9986 GN=CP PE=3 SV=1
3	K.ELHHLQEQN[+2204.772]VSNPFLDKEEFYIGSK.Y-NeuAc(2)Hex(5)HexNAc(4)	2.51215113161838	2.07674924292541	2.93853123216866	2.78154398541118	1.73731212365571	>tr|G1SJX3|G1SJX3_RABIT Ceruloplasmin OS=Oryctolagus cuniculus OX=9986 GN=CP PE=3 SV=1
3	K.ELHHLQEQN[+2279.830]VSNPFLDKEEFYIGSKYK.K-Fuc(2)Hex(6)HexNAc(5)	-6.36242	-5.78923	-0.837983	-6.17725	-6.21157	>tr|G1SJX3|G1SJX3_RABIT Ceruloplasmin OS=Oryctolagus cuniculus OX=9986 GN=CP PE=3 SV=1
3	K.ELHHLQEQN[+2553.910]VSNPFLDKEEFYIGSKYK.K-NeuAc(2)Fuc(1)Hex(5)HexNAc(5)	-6.3144	-5.51294	-0.361877	-6.37956	-6.51052	>tr|G1SJX3|G1SJX3_RABIT Ceruloplasmin OS=Oryctolagus cuniculus OX=9986 GN=CP PE=3 SV=1
3	K.ELHHLQEQN[+2717.978]VSNPFLDKEEFYIGSK.Y-Hex(8)HexNAc(7)	-5.87641	-6.47705	-0.837983	-6.61075	-6.11337	>tr|G1SJX3|G1SJX3_RABIT Ceruloplasmin OS=Oryctolagus cuniculus OX=9986 GN=CP PE=3 SV=1
3	K.FEVKVTMPKIITFLEEEVN[+1548.545]VSVC[+57.021]GIYTYGK.A-NeuAc(1)Hex(4)HexNAc(3)	-6.34697	-6.28751	-0.361877	-6.00806	-6.36301	>tr|G1SQ70|G1SQ70_RABIT Alpha-2-macroglobulin OS=Oryctolagus cuniculus OX=9986 GN=A2M PE=3 SV=3
3	K.FEVQVKVPKVITILEEEVN[+2350.830]VSVC[+57.021]GIYTYGK.P-NeuAc(2)Fuc(1)Hex(5)HexNAc(4)	-5.45906	-5.92527	-0.361877	-5.88173	-6.18848	>tr|G1TR31|G1TR31_RABIT Uncharacterized protein OS=Oryctolagus cuniculus OX=9986 PE=3 SV=3
3	K.FHDVSESTHWTPFLN[+1913.677]ASIHYIHENYPFPWEK.D-NeuAc(1)Hex(5)HexNAc(4)	-5.94084	-5.85132	-0.866483	-5.71907	-5.69896	>tr|G1SD43|G1SD43_RABIT Glycosyl-phosphatidylinositol-specific phospholipase D OS=Oryctolagus cuniculus OX=9986 GN=GPLD1 PE=3 SV=3
3	K.FLN[+1419.502]NTFR.W-Hex(5)HexNAc(3)	-5.82885	-6.12487	-0.361877	-6.28257	-6.1708	>tr|A0A4Z2DI40|A0A4Z2DI40_SCHJA Chaperone protein isoform 2 OS=Schistosoma japonicum OX=6182 GN=EWB00_000687 PE=4 SV=1
3	K.FN[+1913.677]SSYFQGTNQITGR.Y-NeuAc(1)Hex(5)HexNAc(4)	-6.0767	-5.81725	-0.837983	-5.5347	-5.83487	>tr|G1U9R4|G1U9R4_RABIT Apolipoprotein B OS=Oryctolagus cuniculus OX=9986 GN=APOB PE=4 SV=2
3	K.FN[+2204.772]LTETPEMEIHWGFQQLLSALR.Q-NeuAc(2)Hex(5)HexNAc(4)	-5.95913	-6.31009	-0.837983	-6.22696	-6.46962	>tr|G1TM88|G1TM88_RABIT Serpin family A member 3 OS=Oryctolagus cuniculus OX=9986 GN=SERPINA3 PE=3 SV=2
3	K.FVGAPEVN[+2350.830]HTTLYQR.Y-NeuAc(2)Fuc(1)Hex(5)HexNAc(4)	-5.7147	-6.07373	0.101465570935514	-6.08639	-5.45347	>sp|P20614|TIMP1_RABIT Metalloproteinase inhibitor 1 OS=Oryctolagus cuniculus OX=9986 GN=TIMP1 PE=2 SV=2
3	K.GHNAQNN[+2262.814]VSQNVFLGHTNVEEIMK.L-NeuAc(1)Fuc(1)Hex(5)HexNAc(5)	-5.72406	-6.0901	-0.866483	-6.03859	-5.91069	>tr|G1T7H9|G1T7H9_RABIT Complement C1r OS=Oryctolagus cuniculus OX=9986 GN=C1R PE=4 SV=2
3	K.GIPMPN[+2060.755]K.T-Fuc(3)Hex(5)HexNAc(4)	-6.30032	-6.36273	-0.361877	-5.84942	-5.96393	>tr|G1SQ70|G1SQ70_RABIT Alpha-2-macroglobulin OS=Oryctolagus cuniculus OX=9986 GN=A2M PE=3 SV=3
3	K.GIPMPN[+2204.772]KTISIR.A-NeuAc(2)Hex(5)HexNAc(4)	-6.20045	-6.40232	-0.837983	-5.90611	-5.93191	>tr|G1SQ70|G1SQ70_RABIT Alpha-2-macroglobulin OS=Oryctolagus cuniculus OX=9986 GN=A2M PE=3 SV=3
3	K.GIPMPN[+2245.799]K.T-NeuAc(2)Hex(4)HexNAc(5)	-5.71644	-6.01371	-0.852159	-6.42632	-6.17941	>tr|G1SQ70|G1SQ70_RABIT Alpha-2-macroglobulin OS=Oryctolagus cuniculus OX=9986 GN=A2M PE=3 SV=3
3	K.GKWEKPFEPENTKEEDFHVN[+1622.582]ATTTVR.V-Hex(5)HexNAc(4)	-5.95967	-6.40724	-0.837983	-6.73526	-6.09576	>tr|A0A5F9DT67|A0A5F9DT67_RABIT SERPIN domain-containing protein OS=Oryctolagus cuniculus OX=9986 GN=SERPINA1 PE=3 SV=1
3	K.GKWVPVPMMTMEDFATPYFRDQELSC[+57.021]TVVQLNYLGN[+1241.454]ASAFFILPDEGK.M-Fuc(1)Hex(3)HexNAc(3)	-5.7319	-5.49957	-0.837983	-5.94172	-5.78665	>tr|G1TM88|G1TM88_RABIT Serpin family A member 3 OS=Oryctolagus cuniculus OX=9986 GN=SERPINA3 PE=3 SV=2
3	K.GN[+1710.598]ATALFLLPDEGK.L-NeuAc(1)Hex(5)HexNAc(3)	-6.11509	-6.10641	-0.189594	-6.04385	-6.04041	>tr|G1TGM8|G1TGM8_RABIT SERPIN domain-containing protein OS=Oryctolagus cuniculus OX=9986 GN=SERPINA1 PE=3 SV=1
3	K.GN[+1872.651]ATALFLLPDEGK.L-NeuAc(1)Hex(6)HexNAc(3)	-5.50376	-5.98516	-0.591287	-6.06463	-6.04778	>tr|G1TGM8|G1TGM8_RABIT SERPIN domain-containing protein OS=Oryctolagus cuniculus OX=9986 GN=SERPINA1 PE=3 SV=1
3	K.GN[+2204.772]ATALFLLPDEGKLQHLEDTLTTELIAK.F-NeuAc(2)Hex(5)HexNAc(4)	-5.54634	-5.80263	-0.866483	-6.07249	-5.70013	>tr|G1TGM8|G1TGM8_RABIT SERPIN domain-containing protein OS=Oryctolagus cuniculus OX=9986 GN=SERPINA1 PE=3 SV=1
3	K.GN[+2206.813]ATALFLLPDEGKLQHLEDTLTTELIAK.F-Fuc(4)Hex(5)HexNAc(4)	-5.82983	-5.55924	-0.361877	-5.31459	-5.47995	>tr|G1TGM8|G1TGM8_RABIT SERPIN domain-containing protein OS=Oryctolagus cuniculus OX=9986 GN=SERPINA1 PE=3 SV=1
3	K.GN[+3517.228]YS.Q-NeuAc(4)Hex(7)HexNAc(6)	-6.0363	-6.0237	0.115691052274908	-5.44124	-6.07357	>tr|Q5C7J7|Q5C7J7_SCHJA SJCHGC07444 protein (Fragment) OS=Schistosoma japonicum OX=6182 PE=2 SV=2
3	K.GNN[+1809.666]QSPKVTGVFTTLQPQSSIPPYSTEVTETSIVITWTPAPR.I-Fuc(1)Hex(4)HexNAc(5)	-5.75559	-5.19482	-0.361877	-5.6614	-6.26493	>tr|A0A5F9CJW0|A0A5F9CJW0_RABIT Fibronectin OS=Oryctolagus cuniculus OX=9986 GN=FN1 PE=4 SV=1
3	K.GVPIPN[+714.269]ETIFIQAYSANFFLK.A-Fuc(1)Hex(1)HexNAc(2)	-5.59067	-6.11989	-0.866483	-6.10229	-6.04089	>tr|A0A5F9DI97|A0A5F9DI97_RABIT Uncharacterized protein OS=Oryctolagus cuniculus OX=9986 PE=3 SV=1
3	K.HAN[+1711.618]WTLTPLK.S-Fuc(2)Hex(5)HexNAc(3)	-5.71602	-6.04909	-0.837983	-6.21009	-6.54826	>sp|P27170|PON1_RABIT Serum paraoxonase/arylesterase 1 OS=Oryctolagus cuniculus OX=9986 GN=PON1 PE=1 SV=2
3	K.IHVYEKHAN[+568.212]WTLTPLK.S-Hex(1)HexNAc(2)	-6.7777	-5.98387	-0.866483	-5.69577	-6.69297	>sp|P27170|PON1_RABIT Serum paraoxonase/arylesterase 1 OS=Oryctolagus cuniculus OX=9986 GN=PON1 PE=1 SV=2
3	K.IN[+1389.492]R.T-Pent(1)Hex(4)HexNAc(3)	-5.91663	-6.00517	-0.837983	-5.80563	-6.11818	>tr|A0A4Z2DIC3|A0A4Z2DIC3_SCHJA Phosphatidylinositol-binding clathrin assembly protein (Fragment) OS=Schistosoma japonicum OX=6182 GN=EWB00_000622 PE=3 SV=1
3	K.IN[+2204.772]ETVFGFTVEK.S-NeuAc(2)Hex(5)HexNAc(4)	-6.24692	-6.16279	-0.837983	-6.21277	-6.01549	>tr|G1TA71|G1TA71_RABIT Transcobalamin 1 OS=Oryctolagus cuniculus OX=9986 GN=TCN1 PE=3 SV=1
3	K.IN[+2407.852]R.T-NeuAc(2)Hex(5)HexNAc(5)	-6.3503	-5.40639	-0.837983	-5.95601	-6.23599	>tr|A0A4Z2DIC3|A0A4Z2DIC3_SCHJA Phosphatidylinositol-binding clathrin assembly protein (Fragment) OS=Schistosoma japonicum OX=6182 GN=EWB00_000622 PE=3 SV=1
3	K.IN[+2553.910]R.T-NeuAc(2)Fuc(1)Hex(5)HexNAc(5)	-6.00249	-6.40983	-0.837983	-5.36097	-5.81957	>tr|A0A4Z2DIC3|A0A4Z2DIC3_SCHJA Phosphatidylinositol-binding clathrin assembly protein (Fragment) OS=Schistosoma japonicum OX=6182 GN=EWB00_000622 PE=3 SV=1
3	K.IQPC[+57.021]PPPPQIPYSQN[+1872.651]VTTTVNYQDGEK.M-NeuAc(1)Hex(6)HexNAc(3)	-5.47093	-5.64211	-0.837983	-5.71224	-6.02422	>tr|A0A5F9CSQ9|A0A5F9CSQ9_RABIT Uncharacterized protein OS=Oryctolagus cuniculus OX=9986 PE=4 SV=1
3	K.IQSPLFTLDANADIKN[+1864.634]K.T-Hex(9)HexNAc(2)	-5.77122	-5.86771	-0.837983	-6.18493	-5.85044	>tr|G1U9R4|G1U9R4_RABIT Apolipoprotein B OS=Oryctolagus cuniculus OX=9986 GN=APOB PE=4 SV=2
3	K.ISETGHDIALIQLQAPLN[+2206.813]DTDIQKPIC[+57.021]LPSKDDTNAIYTNC[+57.021]WVTGWGFTK.E-Fuc(4)Hex(5)HexNAc(4)	-5.9507	-6.1133	-0.866483	-6.42078	-6.45012	>tr|G1T127|G1T127_RABIT Kallikrein B1 OS=Oryctolagus cuniculus OX=9986 GN=KLKB1 PE=4 SV=2
3	K.IYKKLSTSPFALN[+2424.867]LSILPNVK.F-NeuAc(1)Fuc(1)Hex(6)HexNAc(5)	-5.6028	-5.77492	-0.866483	-6.3813	-6.3977	>tr|G1U9R4|G1U9R4_RABIT Apolipoprotein B OS=Oryctolagus cuniculus OX=9986 GN=APOB PE=4 SV=2
3	K.IYNTPSASYLEVTPDSENDFGNYN[+2407.852]C[+57.021]TAVNR.I-NeuAc(2)Hex(5)HexNAc(5)	-6.03305	-6.5145	-0.837983	-5.56484	-6.18579	>tr|G1SQI4|G1SQI4_RABIT Neural cell adhesion molecule 1 OS=Oryctolagus cuniculus OX=9986 GN=NCAM1 PE=4 SV=3
3	K.KGNLEREC[+57.021]MEEN[+3372.190]C[+57.021]SYEEALEVFEDR.E-NeuAc(3)Fuc(1)Hex(7)HexNAc(6)	-6.1127	-5.60627	-0.837983	-5.70088	-6.59662	>sp|O19045|FA10_RABIT Coagulation factor X OS=Oryctolagus cuniculus OX=9986 GN=F10 PE=2 SV=1
3	K.KLHINHNN[+1257.449]LTESVGPLPK.S-Hex(4)HexNAc(3)	-6.10999	-5.69954	-0.837983	-5.83326	-6.46782	>tr|G1SP97|G1SP97_RABIT Lumican OS=Oryctolagus cuniculus OX=9986 GN=LUM PE=3 SV=1
3	K.KLHINHNN[+1913.677]LTESVGPLPK.S-NeuAc(1)Hex(5)HexNAc(4)	-5.56745	-6.05806	0.674738268306883	-6.01277	-5.50512	>tr|G1SP97|G1SP97_RABIT Lumican OS=Oryctolagus cuniculus OX=9986 GN=LUM PE=3 SV=1
3	K.KLHINHNN[+1914.697]LTESVGPLPK.S-Fuc(2)Hex(5)HexNAc(4)	-6.20926	-6.27995	-0.361877	-6.35817	-5.5571	>tr|G1SP97|G1SP97_RABIT Lumican OS=Oryctolagus cuniculus OX=9986 GN=LUM PE=3 SV=1
3	K.KN[+1548.545]K.S-NeuAc(1)Hex(4)HexNAc(3)	-5.69467	-5.87966	-0.361877	-5.84278	-6.27536	>tr|A0A4Z2CRL7|A0A4Z2CRL7_SCHJA BRCA1-associated RING domain protein OS=Schistosoma japonicum OX=6182 GN=EWB00_008107 PE=4 SV=1
3	K.KN[+2100.761]K.S-NeuAc(1)Fuc(1)Hex(4)HexNAc(5)	-5.56948	-5.75722	-0.361877	-6.44937	-6.25882	>tr|A0A4Z2CRL7|A0A4Z2CRL7_SCHJA BRCA1-associated RING domain protein OS=Schistosoma japonicum OX=6182 GN=EWB00_008107 PE=4 SV=1
3	K.KNKEDALN[+2861.000]ETR.D-NeuAc(3)Hex(6)HexNAc(5)	-6.52784	-6.17011	-0.866483	-6.33914	-6.53431	>sp|Q9XSC5|CLUS_RABIT Clusterin OS=Oryctolagus cuniculus OX=9986 GN=CLU PE=2 SV=1
3	K.KPC[+57.021]N[+2204.772]ASDPQC[+57.021]PPDGR.Y-NeuAc(2)Hex(5)HexNAc(4)	-5.82908	-5.61024	-0.866483	-6.15826	-5.9867	>tr|A0A5F9D1G8|A0A5F9D1G8_RABIT CN hydrolase domain-containing protein OS=Oryctolagus cuniculus OX=9986 PE=3 SV=1
3	K.LGAC[+57.021]N[+1914.697]DTLK.Q-Fuc(2)Hex(5)HexNAc(4)	-5.74416	-6.07029	0.0870922090334206	-5.87835	-6.00632	>tr|G1SIK0|G1SIK0_RABIT Antithrombin-III OS=Oryctolagus cuniculus OX=9986 GN=SERPINC1 PE=3 SV=1
3	K.LGN[+2206.813]WSAQPSC[+57.021]K.A-Fuc(4)Hex(5)HexNAc(4)	-6.70282	-6.32914	-0.866483	-6.38087	-6.60952	>tr|G1SJM1|G1SJM1_RABIT Apolipoprotein H OS=Oryctolagus cuniculus OX=9986 GN=CEP112 PE=4 SV=2
3	K.LHINHNN[+2279.830]LTESVGPLPK.S-Fuc(2)Hex(6)HexNAc(5)	-6.13591	-5.9076	0.593173151808632	-6.13748	-6.20752	>tr|G1SP97|G1SP97_RABIT Lumican OS=Oryctolagus cuniculus OX=9986 GN=LUM PE=3 SV=1
3	K.LN[+1063.407]GSFPGPLQPIVFQEALYNHRGHFDLATGVFTC[+57.021]TVPGLYHFGFDIALFQNAVK.V-Fuc(2)Hex(1)HexNAc(3)	-6.39558	-6.0065	-0.837983	-5.70498	-5.92478	>tr|G1U575|G1U575_RABIT C1q domain-containing protein OS=Oryctolagus cuniculus OX=9986 PE=4 SV=2
3	K.LN[+1913.677]GSFPGPLQPIVFQEALYNHR.G-NeuAc(1)Hex(5)HexNAc(4)	0.350794383829819	0.368634978299191	1.19903924440529	0.06795760654184	0.458742197523151	>tr|G1U575|G1U575_RABIT C1q domain-containing protein OS=Oryctolagus cuniculus OX=9986 PE=4 SV=2
3	K.LN[+1913.677]NSVIFK.I-NeuAc(1)Hex(5)HexNAc(4)	-6.00837	-6.16435	-0.837983	-5.9672	-6.10243	>tr|G1U9R4|G1U9R4_RABIT Apolipoprotein B OS=Oryctolagus cuniculus OX=9986 GN=APOB PE=4 SV=2
3	K.LQEQPHIQRTEVSTNHVLIYFEELTN[+2206.813]KTLSFSFLVEQDIQIENLKPATVK.A-Fuc(4)Hex(5)HexNAc(4)	-6.26569	-6.12319	-0.866483	-5.87029	-5.58587	>tr|A0A5F9C1C5|A0A5F9C1C5_RABIT Uncharacterized protein OS=Oryctolagus cuniculus OX=9986 PE=3 SV=1
3	K.LQRPKKVISN[+1710.598]ATEVK.E-NeuAc(1)Hex(5)HexNAc(3)	-5.8957	-5.56212	-0.361877	-5.98111	-5.78693	>tr|A0A4Z2D1A1|A0A4Z2D1A1_SCHJA Netrin receptor UNC5 OS=Schistosoma japonicum OX=6182 GN=EWB00_005545 PE=3 SV=1
3	K.LSPEDLLLRWANYHLENAGC[+57.021]NKISN[+2553.910]FSTDIK.L-NeuAc(2)Fuc(1)Hex(5)HexNAc(5)	-6.35497	-6.22589	-0.837983	-5.93328	-5.96477	>tr|G1TET2|G1TET2_RABIT Lymphocyte cytosolic protein 1 OS=Oryctolagus cuniculus OX=9986 GN=LCP1 PE=4 SV=2
3	K.LTDFPDKGEFVVTVDQLTQN[+1913.677]DSGSYK.C-NeuAc(1)Hex(5)HexNAc(4)	-6.07488	-6.38891	-0.299481	-6.75073	-6.33549	>sp|P01832|PIGR_RABIT Polymeric immunoglobulin receptor OS=Oryctolagus cuniculus OX=9986 GN=PIGR PE=1 SV=1
3	K.LTDFPDKGEFVVTVDQLTQN[+2204.772]DTGSYK.C-NeuAc(2)Hex(5)HexNAc(4)	-6.33427	-6.11975	0.867029454208426	-5.98797	-5.74662	>tr|G1T763|G1T763_RABIT Polymeric immunoglobulin receptor OS=Oryctolagus cuniculus OX=9986 GN=PIGR PE=4 SV=2
3	K.LVKEVVSLTEDC[+57.021]C[+57.021]AEDADPGC[+57.021]YDN[+1864.634]R.T-Hex(9)HexNAc(2)	-6.28077	-5.98204	-0.361877	-6.42639	-6.67902	>tr|G1SU82|G1SU82_RABIT Gc-globulin OS=Oryctolagus cuniculus OX=9986 GN=GC PE=4 SV=2
3	K.MN[+730.264]K.T-Hex(2)HexNAc(2)	-5.64297	-5.7579	-0.837983	-6.01718	-6.18303	>tr|G1T6S4|G1T6S4_RABIT Dystonin OS=Oryctolagus cuniculus OX=9986 GN=DST PE=3 SV=3
3	K.N[+1184.433]SSLC[+57.021]ELC[+57.021]IGPSVC[+57.021]APNNR.E-Fuc(2)Hex(3)HexNAc(2)	-6.50536	-5.73402	-0.837983	-6.66837	-5.62725	>tr|G1STF7|G1STF7_RABIT Beta-1 metal-binding globulin OS=Oryctolagus cuniculus OX=9986 PE=3 SV=1
3	K.N[+1216.423]LSAVFK.D-Hex(5)HexNAc(2)	-5.79558	-6.33813	-0.361877	-6.0211	-5.86869	>tr|G1SLH8|G1SLH8_RABIT Otoancorin OS=Oryctolagus cuniculus OX=9986 GN=OTOA PE=4 SV=2
3	K.N[+1216.423]NSEISSR.T-Hex(5)HexNAc(2)	-5.95703	-6.60604	-0.866483	-5.62179	-6.03284	>sp|P03988|IGHM_RABIT Ig mu chain C region secreted form OS=Oryctolagus cuniculus OX=9986 PE=2 SV=1
3	K.N[+1257.449]NSEISSR.T-Hex(4)HexNAc(3)	-6.35769	-5.93321	-0.866483	-6.03122	-5.98927	>sp|P03988|IGHM_RABIT Ig mu chain C region secreted form OS=Oryctolagus cuniculus OX=9986 PE=2 SV=1
3	K.N[+1378.476]NSEISSR.T-Hex(6)HexNAc(2)	-6.13553	-6.0839	-0.668729	-5.75673	-5.93703	>sp|P03988|IGHM_RABIT Ig mu chain C region secreted form OS=Oryctolagus cuniculus OX=9986 PE=2 SV=1
3	K.N[+1519.555]NTR.G-Fuc(2)Pent(1)Hex(3)HexNAc(3)	-5.61548	-5.87381	-0.361877	-5.95542	-5.79247	>tr|A0A5F9DC52|A0A5F9DC52_RABIT Tenascin C OS=Oryctolagus cuniculus OX=9986 GN=TNC PE=3 SV=1
3	K.N[+1519.555]SSLC[+57.021]ELC[+57.021]IGPSVC[+57.021]APNNR.E-Fuc(2)Pent(1)Hex(3)HexNAc(3)	-5.81933	-5.80713	-0.837983	-5.56094	-6.43645	>tr|G1STF7|G1STF7_RABIT Beta-1 metal-binding globulin OS=Oryctolagus cuniculus OX=9986 PE=3 SV=1
3	K.N[+1540.529]LSAVFK.D-Hex(7)HexNAc(2)	-6.09211	-5.91169	-0.361877	-6.15117	-5.96284	>tr|G1SLH8|G1SLH8_RABIT Otoancorin OS=Oryctolagus cuniculus OX=9986 GN=OTOA PE=4 SV=2
3	K.N[+1622.582]ITDLSQK.T-Hex(5)HexNAc(4)	-6.01975	-6.31098	-0.361877	-6.0422	-6.33764	>tr|G1SJH5|G1SJH5_RABIT LIF receptor subunit alpha OS=Oryctolagus cuniculus OX=9986 GN=LIFR PE=3 SV=2
3	K.N[+1622.582]NSEISSR.T-Hex(5)HexNAc(4)	-6.21009	-5.92422	-0.319969	-5.90197	-5.53828	>sp|P03988|IGHM_RABIT Ig mu chain C region secreted form OS=Oryctolagus cuniculus OX=9986 PE=2 SV=1
3	K.N[+1694.603]QTRELR.V-NeuAc(1)Fuc(1)Hex(4)HexNAc(3)	-5.88241	-5.31752	-0.837983	-6.20493	-5.70491	>tr|U3KPG6|U3KPG6_RABIT Intercellular adhesion molecule 1 OS=Oryctolagus cuniculus OX=9986 GN=ICAM1 PE=3 SV=1
3	K.N[+1809.666]SSLC[+57.021]ELC[+57.021]VGPSVC[+57.021]APNNR.E-Fuc(1)Hex(4)HexNAc(5)	-6.15327	-5.61335	-0.668729	-0.835796	-6.25287	>sp|P19134|TRFE_RABIT Serotransferrin OS=Oryctolagus cuniculus OX=9986 GN=TF PE=1 SV=4
3	K.N[+1825.661]NSEISSR.T-Hex(5)HexNAc(5)	-6.36461	-6.0763	-0.852159	-5.56463	-6.25189	>sp|P03988|IGHM_RABIT Ig mu chain C region secreted form OS=Oryctolagus cuniculus OX=9986 PE=2 SV=1
3	K.N[+1825.661]SSLC[+57.021]ELC[+57.021]VGPSVC[+57.021]APNNR.E-Hex(5)HexNAc(5)	-6.00677	-5.82933	-0.866483	-6.08317	-5.92193	>sp|P19134|TRFE_RABIT Serotransferrin OS=Oryctolagus cuniculus OX=9986 GN=TF PE=1 SV=4
3	K.N[+1907.714]SSLC[+57.021]ELC[+57.021]VGPSVC[+57.021]APNNR.E-Hex(3)HexNAc(7)	-5.72987	-5.93024	-0.361877	-5.75049	-6.13562	>sp|P19134|TRFE_RABIT Serotransferrin OS=Oryctolagus cuniculus OX=9986 GN=TF PE=1 SV=4
3	K.N[+1913.677]HTAVLEK.H-NeuAc(1)Hex(5)HexNAc(4)	-6.29826	-6.09351	0.115691052274908	-6.08897	-5.84647	>tr|G1TZA1|G1TZA1_RABIT C1q domain-containing protein OS=Oryctolagus cuniculus OX=9986 PE=4 SV=2
3	K.N[+1955.724]TTC[+57.021]R.D-Fuc(2)Hex(4)HexNAc(5)	-5.9497	-5.57868	-0.361877	-5.53562	-6.51989	>tr|G1SS91|G1SS91_RABIT C4a anaphylatoxin OS=Oryctolagus cuniculus OX=9986 PE=4 SV=2
3	K.N[+1971.719]NTR.G-Fuc(1)Hex(5)HexNAc(5)	-5.49663	-5.91782	-0.866483	-5.93671	-5.76937	>tr|A0A5F9DC52|A0A5F9DC52_RABIT Tenascin C OS=Oryctolagus cuniculus OX=9986 GN=TNC PE=3 SV=1
3	K.N[+2059.735]NSEISSR.T-NeuAc(1)Fuc(1)Hex(5)HexNAc(4)	-6.22831	-6.34364	-0.852159	-6.0766	-5.70528	>sp|P03988|IGHM_RABIT Ig mu chain C region secreted form OS=Oryctolagus cuniculus OX=9986 PE=2 SV=1
3	K.N[+2076.750]STTVTLK.M-Fuc(2)Hex(6)HexNAc(4)	-6.04045	-6.21267	-0.852159	-5.42413	-6.16037	>tr|G1U8I1|G1U8I1_RABIT Ig-like domain-containing protein OS=Oryctolagus cuniculus OX=9986 PE=4 SV=2
3	K.N[+2100.761]VSAPR.Q-NeuAc(1)Fuc(1)Hex(4)HexNAc(5)	-6.3111	-6.3593	-0.837983	-6.04359	-5.69141	>tr|U3KPG6|U3KPG6_RABIT Intercellular adhesion molecule 1 OS=Oryctolagus cuniculus OX=9986 GN=ICAM1 PE=3 SV=1
3	K.N[+2101.782]NSEISSR.T-Fuc(3)Hex(4)HexNAc(5)	-6.6343	-6.02103	-0.361877	-6.57928	-5.67338	>sp|P03988|IGHM_RABIT Ig mu chain C region secreted form OS=Oryctolagus cuniculus OX=9986 PE=2 SV=1
3	K.N[+2101.782]SSLC[+57.021]ELC[+57.021]IGPSVC[+57.021]APNNR.E-Fuc(3)Hex(4)HexNAc(5)	-5.76952	-6.25477	-0.579538	-6.17293	-5.45579	>tr|G1STF7|G1STF7_RABIT Beta-1 metal-binding globulin OS=Oryctolagus cuniculus OX=9986 PE=3 SV=1
3	K.N[+2116.756]NSEISSR.T-NeuAc(1)Hex(5)HexNAc(5)	-5.72859	-5.95294	-0.837983	-6.25588	-6.20394	>sp|P03988|IGHM_RABIT Ig mu chain C region secreted form OS=Oryctolagus cuniculus OX=9986 PE=2 SV=1
3	K.N[+2142.808]NSR.R-Fuc(3)Hex(3)HexNAc(6)	-6.44899	-5.41727	-0.361877	-5.40806	-5.60143	>tr|A0A4Z2CRL7|A0A4Z2CRL7_SCHJA BRCA1-associated RING domain protein OS=Schistosoma japonicum OX=6182 GN=EWB00_008107 PE=4 SV=1
3	K.N[+2142.808]VSMSSEC[+57.021]STTPSPGIQVFPIAPSFADTFLSK.S-Fuc(3)Hex(3)HexNAc(6)	-5.39948	-6.07754	-0.837983	-6.17657	-5.94071	>sp|P03988|IGHM_RABIT Ig mu chain C region secreted form OS=Oryctolagus cuniculus OX=9986 PE=2 SV=1
3	K.N[+2190.793]NSR.R-Hex(6)HexNAc(6)	-5.90021	-5.98596	-0.361877	-6.10354	-6.37506	>tr|A0A4Z2CRL7|A0A4Z2CRL7_SCHJA BRCA1-associated RING domain protein OS=Schistosoma japonicum OX=6182 GN=EWB00_008107 PE=4 SV=1
3	K.N[+2204.772]GTSVC[+57.021]ATNGK.S-NeuAc(2)Hex(5)HexNAc(4)	-0.629762	-0.581775	-0.361877	-0.755305	-0.700839	>tr|A0A5F9CAP0|A0A5F9CAP0_RABIT Uncharacterized protein OS=Oryctolagus cuniculus OX=9986 PE=4 SV=1
3	K.N[+2204.772]HTAVLEK.H-NeuAc(2)Hex(5)HexNAc(4)	0.294250018604829	0.0813955262550899	0.702057466165696	0.546926000553984	-0.305489	>tr|G1TZA1|G1TZA1_RABIT C1q domain-containing protein OS=Oryctolagus cuniculus OX=9986 PE=4 SV=2
3	K.N[+2204.772]ISEIADSPTK.V-NeuAc(2)Hex(5)HexNAc(4)	-6.08958	-6.22959	-0.361877	-6.18966	-6.22892	>tr|G1SJH5|G1SJH5_RABIT LIF receptor subunit alpha OS=Oryctolagus cuniculus OX=9986 GN=LIFR PE=3 SV=2
3	K.N[+2204.772]NSEISSR.T-NeuAc(2)Hex(5)HexNAc(4)	-6.07419	-5.72497	-0.361877	-6.45712	-5.45976	>sp|P03988|IGHM_RABIT Ig mu chain C region secreted form OS=Oryctolagus cuniculus OX=9986 PE=2 SV=1
3	K.N[+2204.772]VTK.D-NeuAc(2)Hex(5)HexNAc(4)	-6.07665	-6.14625	-0.361877	-6.35914	-6.67755	>tr|G1U128|G1U128_RABIT Mannan binding lectin serine peptidase 1 OS=Oryctolagus cuniculus OX=9986 GN=MASP1 PE=4 SV=3
3	K.N[+2245.799]LTR.E-NeuAc(2)Hex(4)HexNAc(5)	-5.47092	-5.98241	-0.361877	-5.51422	-5.992	>tr|A0A4Z2DPV1|A0A4Z2DPV1_SCHJA Eukaryotic translation initiation factor 3 subunit A (Fragment) OS=Schistosoma japonicum OX=6182 GN=EWB00_010048 PE=3 SV=1
3	K.N[+2262.814]LTR.E-NeuAc(1)Fuc(1)Hex(5)HexNAc(5)	-6.07394	-5.48388	-0.361877	-6.33593	-6.05382	>tr|A0A4Z2DPV1|A0A4Z2DPV1_SCHJA Eukaryotic translation initiation factor 3 subunit A (Fragment) OS=Schistosoma japonicum OX=6182 GN=EWB00_010048 PE=3 SV=1
3	K.N[+2262.814]NTR.G-NeuAc(1)Fuc(1)Hex(5)HexNAc(5)	-5.59121	-6.09383	-0.866483	-5.90579	-6.2702	>tr|A0A5F9DC52|A0A5F9DC52_RABIT Tenascin C OS=Oryctolagus cuniculus OX=9986 GN=TNC PE=3 SV=1
3	K.N[+2263.835]NSR.R-Fuc(3)Hex(5)HexNAc(5)	-6.36836	-5.94984	-0.361877	-6.08551	-5.53109	>tr|A0A4Z2CRL7|A0A4Z2CRL7_SCHJA BRCA1-associated RING domain protein OS=Schistosoma japonicum OX=6182 GN=EWB00_008107 PE=4 SV=1
3	K.N[+2263.835]SSLC[+57.021]ELC[+57.021]VGPSVC[+57.021]APNNR.E-Fuc(3)Hex(5)HexNAc(5)	-5.99407	-6.15047	-0.361877	-6.03609	-6.1918	>sp|P19134|TRFE_RABIT Serotransferrin OS=Oryctolagus cuniculus OX=9986 GN=TF PE=1 SV=4
3	K.N[+2278.809]NSEISSR.T-NeuAc(1)Hex(6)HexNAc(5)	-5.83223	-6.06971	-0.837983	-6.35216	-5.88656	>sp|P03988|IGHM_RABIT Ig mu chain C region secreted form OS=Oryctolagus cuniculus OX=9986 PE=2 SV=1
3	K.N[+2350.830]NSR.R-NeuAc(2)Fuc(1)Hex(5)HexNAc(4)	-6.47799	-6.20923	-0.361877	-6.04873	-5.69424	>tr|A0A4Z2CRL7|A0A4Z2CRL7_SCHJA BRCA1-associated RING domain protein OS=Schistosoma japonicum OX=6182 GN=EWB00_008107 PE=4 SV=1
3	K.N[+2553.910]NTR.G-NeuAc(2)Fuc(1)Hex(5)HexNAc(5)	-5.90071	-6.02968	-0.866483	-6.21306	-6.10304	>tr|A0A5F9DC52|A0A5F9DC52_RABIT Tenascin C OS=Oryctolagus cuniculus OX=9986 GN=TNC PE=3 SV=1
3	K.N[+2553.910]VTK.D-NeuAc(2)Fuc(1)Hex(5)HexNAc(5)	-6.29117	-5.85529	-0.361877	-6.08337	-5.65473	>tr|G1U128|G1U128_RABIT Mannan binding lectin serine peptidase 1 OS=Oryctolagus cuniculus OX=9986 GN=MASP1 PE=4 SV=3
3	K.N[+2644.962]LSPR.A-Fuc(2)Hex(7)HexNAc(6)	-6.15821	-5.96191	-0.361877	-6.34349	-5.94396	>tr|G1SDD6|G1SDD6_RABIT Angiotensin 1-10 OS=Oryctolagus cuniculus OX=9986 GN=AGT PE=3 SV=3
3	K.N[+2715.963]KSKR.N-NeuAc(2)Fuc(1)Hex(6)HexNAc(5)	-6.31656	-6.39253	0.593173151808632	-6.18647	-6.00847	>tr|A0A4Z2CRL7|A0A4Z2CRL7_SCHJA BRCA1-associated RING domain protein OS=Schistosoma japonicum OX=6182 GN=EWB00_008107 PE=4 SV=1
3	K.N[+2715.963]VTK.D-NeuAc(2)Fuc(1)Hex(6)HexNAc(5)	-6.21993	-5.45082	-0.361877	-0.755305	-6.02373	>tr|G1U128|G1U128_RABIT Mannan binding lectin serine peptidase 1 OS=Oryctolagus cuniculus OX=9986 GN=MASP1 PE=4 SV=3
3	K.N[+2756.989]LTR.E-NeuAc(2)Fuc(1)Hex(5)HexNAc(6)	-6.19685	-5.79244	-0.361877	-6.33171	-5.94135	>tr|A0A4Z2DPV1|A0A4Z2DPV1_SCHJA Eukaryotic translation initiation factor 3 subunit A (Fragment) OS=Schistosoma japonicum OX=6182 GN=EWB00_010048 PE=3 SV=1
3	K.N[+2756.989]NTR.G-NeuAc(2)Fuc(1)Hex(5)HexNAc(6)	-5.71218	-5.9916	-0.866483	-5.99745	-6.38806	>tr|A0A5F9DC52|A0A5F9DC52_RABIT Tenascin C OS=Oryctolagus cuniculus OX=9986 GN=TNC PE=3 SV=1
3	K.N[+2861.000]ASLTR.K-NeuAc(3)Hex(6)HexNAc(5)	-5.72083	-6.21631	-0.837983	-5.88147	-5.81002	>tr|A0A4Z2DIC3|A0A4Z2DIC3_SCHJA Phosphatidylinositol-binding clathrin assembly protein (Fragment) OS=Schistosoma japonicum OX=6182 GN=EWB00_000622 PE=3 SV=1
3	K.N[+2861.000]ESFQC[+57.021]VNGK.N-NeuAc(3)Hex(6)HexNAc(5)	0.515909362963373	-0.0720599	1.15268096545229	-0.576258	-0.00883865	>tr|A0A5F9CAP0|A0A5F9CAP0_RABIT Uncharacterized protein OS=Oryctolagus cuniculus OX=9986 PE=4 SV=1
3	K.N[+2861.000]FTVNDILVR.I-NeuAc(3)Hex(6)HexNAc(5)	-6.02263	-6.38455	-0.866483	-6.72387	-5.5301	>tr|Q28731|Q28731_RABIT Thrombin (Fragment) OS=Oryctolagus cuniculus OX=9986 GN=thrombin PE=2 SV=1
3	K.N[+2861.000]ITDLSQK.T-NeuAc(3)Hex(6)HexNAc(5)	-5.95647	-5.45171	-0.361877	-5.87937	-5.72745	>tr|G1SJH5|G1SJH5_RABIT LIF receptor subunit alpha OS=Oryctolagus cuniculus OX=9986 GN=LIFR PE=3 SV=2
3	K.N[+2861.000]KSLR.T-NeuAc(3)Hex(6)HexNAc(5)	-6.73269	-5.64648	-0.837983	-5.86115	-5.93802	>tr|A0A5F9C115|A0A5F9C115_RABIT Ring finger protein 8 OS=Oryctolagus cuniculus OX=9986 GN=RNF8 PE=4 SV=1
3	K.N[+2861.000]LTR.E-NeuAc(3)Hex(6)HexNAc(5)	-5.80348	-6.10689	-0.361877	-6.002	-6.39721	>tr|A0A4Z2DPV1|A0A4Z2DPV1_SCHJA Eukaryotic translation initiation factor 3 subunit A (Fragment) OS=Schistosoma japonicum OX=6182 GN=EWB00_010048 PE=3 SV=1
3	K.N[+2861.000]NSIWYK.L-NeuAc(3)Hex(6)HexNAc(5)	-6.09135	-6.3256	-0.837983	-5.85428	-5.67148	>tr|A0A5F9CG95|A0A5F9CG95_RABIT Uncharacterized protein OS=Oryctolagus cuniculus OX=9986 PE=4 SV=1
3	K.N[+3007.058]ITDLSQK.T-NeuAc(3)Fuc(1)Hex(6)HexNAc(5)	-6.00421	-5.85847	0.593173151808632	-6.13497	-5.48726	>tr|G1SJH5|G1SJH5_RABIT LIF receptor subunit alpha OS=Oryctolagus cuniculus OX=9986 GN=LIFR PE=3 SV=2
3	K.N[+3007.058]LSPR.A-NeuAc(3)Fuc(1)Hex(6)HexNAc(5)	-6.45695	-6.20634	-0.852159	-5.69913	-6.40564	>tr|G1SDD6|G1SDD6_RABIT Angiotensin 1-10 OS=Oryctolagus cuniculus OX=9986 GN=AGT PE=3 SV=3
3	K.N[+3007.058]NSIWYK.L-NeuAc(3)Fuc(1)Hex(6)HexNAc(5)	-5.59172	-6.54314	-0.837983	-5.33391	-5.80665	>tr|A0A5F9CG95|A0A5F9CG95_RABIT Uncharacterized protein OS=Oryctolagus cuniculus OX=9986 PE=4 SV=1
3	K.N[+3372.190]ASSNR.F-NeuAc(3)Fuc(1)Hex(7)HexNAc(6)	-5.47386	-6.59123	-0.361877	-5.84221	-5.40911	>tr|A0A4Z2CP65|A0A4Z2CP65_SCHJA Uncharacterized protein OS=Schistosoma japonicum OX=6182 GN=EWB00_008685 PE=4 SV=1
3	K.N[+3372.190]LSPR.A-NeuAc(3)Fuc(1)Hex(7)HexNAc(6)	-6.09834	-6.36805	-0.837983	-6.1332	-5.8288	>tr|G1SDD6|G1SDD6_RABIT Angiotensin 1-10 OS=Oryctolagus cuniculus OX=9986 GN=AGT PE=3 SV=3
3	K.N[+3517.228]NTR.G-NeuAc(4)Hex(7)HexNAc(6)	-5.8532	-5.52577	0.115691052274908	-5.79204	-5.99323	>tr|A0A5F9DC52|A0A5F9DC52_RABIT Tenascin C OS=Oryctolagus cuniculus OX=9986 GN=TNC PE=3 SV=1
3	K.N[+3517.228]STTVTLK.M-NeuAc(4)Hex(7)HexNAc(6)	-6.23367	-6.24836	-0.837983	-6.05894	-5.73782	>tr|G1U8I1|G1U8I1_RABIT Ig-like domain-containing protein OS=Oryctolagus cuniculus OX=9986 PE=4 SV=2
3	K.N[+3663.286]LTR.E-NeuAc(4)Fuc(1)Hex(7)HexNAc(6)	-6.45558	-5.68658	-0.361877	-5.86963	-5.85637	>tr|A0A4Z2DPV1|A0A4Z2DPV1_SCHJA Eukaryotic translation initiation factor 3 subunit A (Fragment) OS=Schistosoma japonicum OX=6182 GN=EWB00_010048 PE=3 SV=1
3	K.N[+3663.286]NSR.R-NeuAc(4)Fuc(1)Hex(7)HexNAc(6)	-5.74087	-5.78726	-0.361877	-5.86262	-6.04328	>tr|A0A4Z2CRL7|A0A4Z2CRL7_SCHJA BRCA1-associated RING domain protein OS=Schistosoma japonicum OX=6182 GN=EWB00_008107 PE=4 SV=1
3	K.N[+4028.418]ASLTR.K-NeuAc(4)Fuc(1)Hex(8)HexNAc(7)	-5.84953	-6.13832	-0.837983	-6.11686	-6.00114	>tr|A0A4Z2DIC3|A0A4Z2DIC3_SCHJA Phosphatidylinositol-binding clathrin assembly protein (Fragment) OS=Schistosoma japonicum OX=6182 GN=EWB00_000622 PE=3 SV=1
3	K.N[+4028.418]MTC[+57.021]FQR.E-NeuAc(4)Fuc(1)Hex(8)HexNAc(7)	-5.72247	-5.94293	-0.866483	-5.59493	-5.8926	>tr|G1SM64|G1SM64_RABIT Inter-alpha-trypsin inhibitor heavy chain 2 OS=Oryctolagus cuniculus OX=9986 GN=ITIH2 PE=3 SV=2
3	K.N[+917.349]NSIWYK.L-Fuc(1)Hex(1)HexNAc(3)	-6.29012	-5.56955	-0.361877	-5.94908	-5.99527	>tr|A0A5F9CG95|A0A5F9CG95_RABIT Uncharacterized protein OS=Oryctolagus cuniculus OX=9986 PE=4 SV=1
3	K.NIDQEFVVMFSVVDEN[+2861.000]LSWYLGDNIKTYC[+57.021]SDPEGVDEDDEDFQESNR.M-NeuAc(3)Hex(6)HexNAc(5)	-6.37514	-6.23884	-0.837983	-6.11726	-5.6266	>tr|G1SJX3|G1SJX3_RABIT Ceruloplasmin OS=Oryctolagus cuniculus OX=9986 GN=CP PE=3 SV=1
3	K.NIENC[+57.021]YIPWC[+57.021]DHHLC[+57.021]HNN[+1663.608]GTC[+57.021]ISDGENWFC[+57.021]EC[+57.021]PRLYSGQLC[+57.021]QFSIC[+57.021]ENNPC[+57.021]GNGATC[+57.021]VPK.S-Hex(4)HexNAc(5)	-6.6105	-6.46363	-0.837983	-6.22264	-6.43159	>tr|G1U0E3|G1U0E3_RABIT Uncharacterized protein OS=Oryctolagus cuniculus OX=9986 PE=4 SV=3
3	K.NIENC[+57.021]YIPWC[+57.021]DHHLC[+57.021]HNN[+2262.814]GTC[+57.021]ISDGENWFC[+57.021]EC[+57.021]PRLYSGQLC[+57.021]QFSIC[+57.021]ENNPC[+57.021]GNGATC[+57.021]VPK.S-NeuAc(1)Fuc(1)Hex(5)HexNAc(5)	-5.3936	-5.37114	-0.837983	-5.4894	-5.98822	>tr|G1U0E3|G1U0E3_RABIT Uncharacterized protein OS=Oryctolagus cuniculus OX=9986 PE=4 SV=3
3	K.NKEDALN[+1913.677]ETR.D-NeuAc(1)Hex(5)HexNAc(4)	-5.75486	-5.9498	-0.668729	-5.86579	-6.31558	>sp|Q9XSC5|CLUS_RABIT Clusterin OS=Oryctolagus cuniculus OX=9986 GN=CLU PE=2 SV=1
3	K.NKEDALN[+3517.228]ETR.D-NeuAc(4)Hex(7)HexNAc(6)	-6.38437	-5.96238	-0.866483	-6.40288	-6.17944	>sp|Q9XSC5|CLUS_RABIT Clusterin OS=Oryctolagus cuniculus OX=9986 GN=CLU PE=2 SV=1
3	K.PEDFELLC[+57.021]LN[+1501.555]GTR.K-Hex(3)HexNAc(5)	-6.49943	-5.75563	-0.361877	-5.5414	-6.0252	>tr|G1TKE4|G1TKE4_RABIT Uncharacterized protein OS=Oryctolagus cuniculus OX=9986 PE=3 SV=1
3	K.PFEPENTKEEDFHVN[+2206.813]ATTTVR.V-Fuc(4)Hex(5)HexNAc(4)	-6.29427	-5.84185	-0.668729	-6.17278	-5.60394	>tr|A0A5F9DT67|A0A5F9DT67_RABIT SERPIN domain-containing protein OS=Oryctolagus cuniculus OX=9986 GN=SERPINA1 PE=3 SV=1
3	K.PIPN[+2116.756]K.T-NeuAc(1)Hex(5)HexNAc(5)	-5.9582	-5.79351	-0.837983	-6.07302	-6.59872	>tr|A0A5F9C1C5|A0A5F9C1C5_RABIT Uncharacterized protein OS=Oryctolagus cuniculus OX=9986 PE=3 SV=1
3	K.PIPN[+2756.989]K.T-NeuAc(2)Fuc(1)Hex(5)HexNAc(6)	-5.66292	-6.25125	-0.866483	-6.6829	-6.08208	>tr|A0A5F9C1C5|A0A5F9C1C5_RABIT Uncharacterized protein OS=Oryctolagus cuniculus OX=9986 PE=3 SV=1
3	K.PIPN[+3372.190]K.T-NeuAc(3)Fuc(1)Hex(7)HexNAc(6)	-6.22795	-6.04506	-0.866483	-5.8326	-6.01498	>tr|A0A5F9C1C5|A0A5F9C1C5_RABIT Uncharacterized protein OS=Oryctolagus cuniculus OX=9986 PE=3 SV=1
3	K.PIPN[+860.327]K.T-Fuc(2)Hex(1)HexNAc(2)	-6.25274	-5.63502	-0.837983	-6.10051	-6.06582	>tr|A0A5F9C1C5|A0A5F9C1C5_RABIT Uncharacterized protein OS=Oryctolagus cuniculus OX=9986 PE=3 SV=1
3	K.PKASPEQLEEFYEALTC[+57.021]LGMN[+1996.750]K.T-Fuc(2)Hex(3)HexNAc(6)	-5.88258	-6.05155	-0.866483	-5.50719	-6.06053	>sp|P25227|A1AG_RABIT Alpha-1-acid glycoprotein OS=Oryctolagus cuniculus OX=9986 GN=ORM1 PE=2 SV=1
3	K.PNYMVLVPSLIHTGTPVKGC[+57.021]LLLSQLN[+1038.375]ETVTVTASLEALR.E-Fuc(1)Hex(3)HexNAc(2)	-6.23658	-6.14201	-0.837983	-6.59829	-5.69374	>tr|G1SQ70|G1SQ70_RABIT Alpha-2-macroglobulin OS=Oryctolagus cuniculus OX=9986 GN=A2M PE=3 SV=3
3	K.PTLYN[+1751.624]VSLIMSDTASTC[+57.021]Y.--NeuAc(1)Hex(4)HexNAc(4)	-6.30882	-6.27773	-0.866483	-5.92136	-6.26112	>sp|P03988|IGHM_RABIT Ig mu chain C region secreted form OS=Oryctolagus cuniculus OX=9986 PE=2 SV=1
3	K.PTLYN[+1809.666]VSLIMSDTASTC[+57.021].Y-Fuc(1)Hex(4)HexNAc(5)	-6.00328	-6.32235	-0.866483	-5.88279	-5.98582	>sp|P03988|IGHM_RABIT Ig mu chain C region secreted form OS=Oryctolagus cuniculus OX=9986 PE=2 SV=1
3	K.PTLYN[+1914.697]VSLIMSDTASTC[+57.021].Y-Fuc(2)Hex(5)HexNAc(4)	-6.3675	-6.43533	-0.837983	-5.78719	-6.12921	>sp|P03988|IGHM_RABIT Ig mu chain C region secreted form OS=Oryctolagus cuniculus OX=9986 PE=2 SV=1
3	K.PTLYN[+1914.697]VSLIMSDTASTC[+57.021]Y.--Fuc(2)Hex(5)HexNAc(4)	-6.77883	-6.17662	-0.591287	-5.40152	-6.26595	>sp|P03988|IGHM_RABIT Ig mu chain C region secreted form OS=Oryctolagus cuniculus OX=9986 PE=2 SV=1
3	K.PTN[+3007.058]VSK.H-NeuAc(3)Fuc(1)Hex(6)HexNAc(5)	-5.70142	-6.21611	-0.866483	-6.42152	-5.7212	>tr|G1T739|G1T739_RABIT Apolipoprotein F OS=Oryctolagus cuniculus OX=9986 GN=APOF PE=4 SV=2
3	K.QFN[+1216.423]ATVIIR.S-Hex(5)HexNAc(2)	-5.701	-5.91198	-0.668729	-5.54851	-5.51935	>tr|A0A5F9CFZ9|A0A5F9CFZ9_RABIT Uncharacterized protein OS=Oryctolagus cuniculus OX=9986 PE=4 SV=1
3	K.QFYN[+3372.190]SSMR.S-NeuAc(3)Fuc(1)Hex(7)HexNAc(6)	-5.79952	-6.05259	-0.837983	-6.22692	-6.03173	>tr|A0A4Z2DSH0|A0A4Z2DSH0_SCHJA [Histone H3]-trimethyl-L-lysine(4) demethylase OS=Schistosoma japonicum OX=6182 GN=EWB00_008880 PE=3 SV=1
3	K.QIRHYYIAAEETIWDYAPSGVDTFTHEN[+1809.666]LTAPGSASEVFFEQGPTR.I-Fuc(1)Hex(4)HexNAc(5)	-6.7273	-5.98945	0.0550434595798335	-5.9919	-6.40724	>tr|G1SJX3|G1SJX3_RABIT Ceruloplasmin OS=Oryctolagus cuniculus OX=9986 GN=CP PE=3 SV=1
3	K.QIRHYYIAAEETIWDYAPSGVDTFTHEN[+1825.661]LTAPGSASEVFFEQGPTR.I-Hex(5)HexNAc(5)	-6.07061	-6.20004	-0.579538	-6.06359	-5.96084	>tr|G1SJX3|G1SJX3_RABIT Ceruloplasmin OS=Oryctolagus cuniculus OX=9986 GN=CP PE=3 SV=1
3	K.QIRHYYIAAEETIWDYAPSGVDTFTHEN[+1850.693]LTAPGSASEVFFEQGPTR.I-Fuc(1)Hex(3)HexNAc(6)	-5.40611	-6.24471	-0.361877	-6.24223	-5.57619	>tr|G1SJX3|G1SJX3_RABIT Ceruloplasmin OS=Oryctolagus cuniculus OX=9986 GN=CP PE=3 SV=1
3	K.QN[+917.349]R.S-Fuc(1)Hex(1)HexNAc(3)	-6.51278	-5.98039	-0.837983	-6.04083	-6.21746	>tr|A0A5F9CQJ7|A0A5F9CQJ7_RABIT Zinc finger RANBP2-type containing 3 OS=Oryctolagus cuniculus OX=9986 GN=ZRANB3 PE=4 SV=1
3	K.QTEVHFFVN[+2100.761]ASDVSTVK.A-NeuAc(1)Fuc(1)Hex(4)HexNAc(5)	-5.85267	-6.28068	-0.837983	-6.1871	-5.76061	>tr|G1TET0|G1TET0_RABIT Carboxypeptidase B2 OS=Oryctolagus cuniculus OX=9986 GN=CPB2 PE=3 SV=2
3	K.QYFLNQRDDPEKFHN[+1501.555]SSFK.N-Hex(3)HexNAc(5)	-5.71161	-5.6104	-0.361877	-6.27553	-5.874	>tr|A0A4Z2DLJ5|A0A4Z2DLJ5_SCHJA StAR-related lipid transfer protein OS=Schistosoma japonicum OX=6182 GN=EWB00_011211 PE=3 SV=1
3	K.RC[+57.021]PSELPPTPLGN[+2204.772]R.S-NeuAc(2)Hex(5)HexNAc(4)	-5.91185	-6.177	-0.837983	-5.56459	-5.41814	>tr|G1SG06|G1SG06_RABIT Platelet-derived growth factor receptor beta OS=Oryctolagus cuniculus OX=9986 GN=PDGFRB PE=3 SV=3
3	K.RFN[+1540.529]GSVSFFR.G-Hex(7)HexNAc(2)	-5.95012	-5.83341	-0.579538	-5.42554	-5.37275	>tr|G1T8V2|G1T8V2_RABIT Microfibril associated protein 4 OS=Oryctolagus cuniculus OX=9986 GN=MFAP4 PE=4 SV=2
3	K.RFN[+1872.651]GSVSFFR.G-NeuAc(1)Hex(6)HexNAc(3)	-6.38088	-6.05848	-0.837983	-5.67561	-6.13416	>tr|G1T8V2|G1T8V2_RABIT Microfibril associated protein 4 OS=Oryctolagus cuniculus OX=9986 GN=MFAP4 PE=4 SV=2
3	K.RFN[+2059.735]GSVSFFR.G-NeuAc(1)Fuc(1)Hex(5)HexNAc(4)	-5.29515	-6.20644	-0.852159	-5.64317	-6.03131	>tr|G1T8V2|G1T8V2_RABIT Microfibril associated protein 4 OS=Oryctolagus cuniculus OX=9986 GN=MFAP4 PE=4 SV=2
3	K.RN[+1419.502]R.T-Hex(5)HexNAc(3)	-6.1633	-5.94956	-0.866483	-6.16241	-6.15241	>sp|Q28661|PROC_RABIT Vitamin K-dependent protein C (Fragment) OS=Oryctolagus cuniculus OX=9986 GN=PROC PE=2 SV=1
3	K.SAAC[+57.021]DVVYN[+1647.613]STK.R-Fuc(1)Hex(3)HexNAc(5)	-5.69657	-6.06366	-0.866483	-6.06423	-5.8657	>tr|A0A5F9DB98|A0A5F9DB98_RABIT Uncharacterized protein OS=Oryctolagus cuniculus OX=9986 PE=4 SV=1
3	K.SAAC[+57.021]DVVYN[+1647.613]STKR.S-Fuc(1)Hex(3)HexNAc(5)	-6.16911	-6.25573	-0.852159	-5.82974	-6.39758	>tr|A0A5F9DB98|A0A5F9DB98_RABIT Uncharacterized protein OS=Oryctolagus cuniculus OX=9986 PE=4 SV=1
3	K.SAAC[+57.021]DVVYN[+1768.640]STK.R-Fuc(1)Hex(5)HexNAc(4)	-5.93837	-6.389	-0.866483	-5.86559	-6.27579	>tr|A0A5F9DB98|A0A5F9DB98_RABIT Uncharacterized protein OS=Oryctolagus cuniculus OX=9986 PE=4 SV=1
3	K.SAAC[+57.021]DVVYN[+1768.640]STKR.S-Fuc(1)Hex(5)HexNAc(4)	-5.65036	-6.7634	-0.319969	-5.5238	-6.21653	>tr|A0A5F9DB98|A0A5F9DB98_RABIT Uncharacterized protein OS=Oryctolagus cuniculus OX=9986 PE=4 SV=1
3	K.SAAC[+57.021]DVVYN[+1809.666]STK.R-Fuc(1)Hex(4)HexNAc(5)	-5.3291	-5.83912	-0.866483	-6.20446	-6.26128	>tr|A0A5F9DB98|A0A5F9DB98_RABIT Uncharacterized protein OS=Oryctolagus cuniculus OX=9986 PE=4 SV=1
3	K.SAAC[+57.021]DVVYN[+1809.666]STKR.S-Fuc(1)Hex(4)HexNAc(5)	-5.90932	-5.99296	-0.866483	-6.32363	-6.03238	>tr|A0A5F9DB98|A0A5F9DB98_RABIT Uncharacterized protein OS=Oryctolagus cuniculus OX=9986 PE=4 SV=1
3	K.SAAC[+57.021]DVVYN[+1971.719]STK.R-Fuc(1)Hex(5)HexNAc(5)	-6.31275	-5.68592	-0.299481	-5.57347	-5.49907	>tr|A0A5F9DB98|A0A5F9DB98_RABIT Uncharacterized protein OS=Oryctolagus cuniculus OX=9986 PE=4 SV=1
3	K.SLDFNTLVDN[+714.269]ISVDPVTGDLWVGC[+57.021]HPNGMRIFYYDPK.N-Fuc(1)Hex(1)HexNAc(2)	-6.28329	-5.83768	-0.866483	-5.96446	-5.72027	>sp|P27170|PON1_RABIT Serum paraoxonase/arylesterase 1 OS=Oryctolagus cuniculus OX=9986 GN=PON1 PE=1 SV=2
3	K.SLDFNTLVDN[+876.322]ISVDPVTGDLWVGC[+57.021]HPNGMRIFYYDPKNPPASEVLR.I-Fuc(1)Hex(2)HexNAc(2)	-6.22977	-6.25055	-0.361877	-5.89967	-5.9411	>sp|P27170|PON1_RABIT Serum paraoxonase/arylesterase 1 OS=Oryctolagus cuniculus OX=9986 GN=PON1 PE=1 SV=2
3	K.SLGAKHSVYDTTN[+2553.910]R.T-NeuAc(2)Fuc(1)Hex(5)HexNAc(5)	-6.28613	-5.95956	-0.837983	-6.33856	-5.67159	>tr|G1T6S4|G1T6S4_RABIT Dystonin OS=Oryctolagus cuniculus OX=9986 GN=DST PE=3 SV=3
3	K.SLGSVN[+1914.697]FTVSAEALESQELC[+57.021]ENEVAVVPEHGKK.D-Fuc(2)Hex(5)HexNAc(4)	-5.58036	-6.03235	-0.579538	-5.57322	-6.70318	>tr|G1SQ70|G1SQ70_RABIT Alpha-2-macroglobulin OS=Oryctolagus cuniculus OX=9986 GN=A2M PE=3 SV=3
3	K.SLN[+860.327]ISETYFGTGSSIK.K-Fuc(2)Hex(1)HexNAc(2)	-6.50966	-5.90674	-0.837983	-5.86775	-5.98451	>tr|A0A4Z2CYH9|A0A4Z2CYH9_SCHJA Double-stranded RNA-binding Staufen isoform X1 OS=Schistosoma japonicum OX=6182 GN=EWB00_006367 PE=4 SV=1
3	K.SLQKEMDQHFGMVELLNN[+2424.867]ATNSFLSAC[+57.021]EVDK.E-NeuAc(1)Fuc(1)Hex(6)HexNAc(5)	-6.15159	-5.97864	-0.866483	-5.92371	-5.90415	>tr|G1T6S4|G1T6S4_RABIT Dystonin OS=Oryctolagus cuniculus OX=9986 GN=DST PE=3 SV=3
3	K.SLTFN[+1711.618]ETYQDISEVVYGAR.L-Fuc(2)Hex(5)HexNAc(3)	-5.94419	-6.12063	-0.866483	-6.00769	-6.20046	>tr|G1SIK0|G1SIK0_RABIT Antithrombin-III OS=Oryctolagus cuniculus OX=9986 GN=SERPINC1 PE=3 SV=1
3	K.SLTFN[+2204.772]ETYQDISEVVYGAR.L-NeuAc(2)Hex(5)HexNAc(4)	3.7572142875641	3.37365999611942	4.03590034840412	3.07288830745216	3.36293988789511	>tr|G1SIK0|G1SIK0_RABIT Antithrombin-III OS=Oryctolagus cuniculus OX=9986 GN=SERPINC1 PE=3 SV=1
3	K.SLVSSKVGAEIEGPHSLGPVVTLFIEHAQQLLEN[+1038.375]VTYSC[+57.021]K.V-Fuc(1)Hex(3)HexNAc(2)	-5.72525	-6.02704	-0.361877	-5.82021	-5.74617	>tr|A0A4Z2DLJ5|A0A4Z2DLJ5_SCHJA StAR-related lipid transfer protein OS=Schistosoma japonicum OX=6182 GN=EWB00_011211 PE=3 SV=1
3	K.SMTN[+1913.677]R.T-NeuAc(1)Hex(5)HexNAc(4)	-0.563901	-0.435018	0.0870922090334206	-0.79502	-0.684957	>sp|P47776|HEP2_RABIT Heparin cofactor 2 OS=Oryctolagus cuniculus OX=9986 GN=SERPIND1 PE=2 SV=1
3	K.SPAEDGIHGKQIRHYYIAAEETIWDYAPSGVDTFTHEN[+2204.772]LTAPGSASEVFFEQGPTR.I-NeuAc(2)Hex(5)HexNAc(4)	-5.47439	-6.21978	0.64610645482226	-6.12922	-6.29166	>tr|G1SJX3|G1SJX3_RABIT Ceruloplasmin OS=Oryctolagus cuniculus OX=9986 GN=CP PE=3 SV=1
3	K.SPAEDGIHGKQIRHYYIAAEETIWDYAPSGVDTFTHEN[+2206.813]LTAPGSASEVFFEQGPTR.I-Fuc(4)Hex(5)HexNAc(4)	-6.28614	-6.24399	-0.837983	-5.55638	-5.89058	>tr|G1SJX3|G1SJX3_RABIT Ceruloplasmin OS=Oryctolagus cuniculus OX=9986 GN=CP PE=3 SV=1
3	K.SPAEDGIHGKQIRHYYIAAEETIWDYAPSGVDTFTHEN[+2861.000]LTAPGSASEVFFEQGPTR.I-NeuAc(3)Hex(6)HexNAc(5)	-5.50678	-5.82367	0.593173151808632	-5.4427	-6.14946	>tr|G1SJX3|G1SJX3_RABIT Ceruloplasmin OS=Oryctolagus cuniculus OX=9986 GN=CP PE=3 SV=1
3	K.SPDLEPILSHAVQHFNN[+1257.449]R.T-Hex(4)HexNAc(3)	-6.26002	-6.15964	-0.866483	-6.55954	-6.07381	>tr|A0A5F9CHF0|A0A5F9CHF0_RABIT Kininogen 1 OS=Oryctolagus cuniculus OX=9986 GN=KNG1 PE=4 SV=1
3	K.STGKPTLYN[+1864.634]VSLIMSDTASTC[+57.021]Y.--Hex(9)HexNAc(2)	-6.00398	-5.55896	0.101465570935514	-6.05797	-5.56818	>sp|P03988|IGHM_RABIT Ig mu chain C region secreted form OS=Oryctolagus cuniculus OX=9986 PE=2 SV=1
3	K.STGKPTLYN[+2553.910]VSLIMSDTASTC[+57.021]Y.--NeuAc(2)Fuc(1)Hex(5)HexNAc(5)	-6.27944	-5.96219	-0.837983	-6.58373	-6.10217	>sp|P03988|IGHM_RABIT Ig mu chain C region secreted form OS=Oryctolagus cuniculus OX=9986 PE=2 SV=1
3	K.TIGATYMAASGLN[+2278.809]TTQC[+57.021]QDSSHPQEHLQILFEFAK.E-NeuAc(1)Hex(6)HexNAc(5)	-6.28154	-6.13311	-0.361877	-0.835796	-6.14652	>tr|G1SU24|G1SU24_RABIT Adenylate cyclase 9 OS=Oryctolagus cuniculus OX=9986 GN=ADCY9 PE=3 SV=3
3	K.TLC[+57.021]C[+57.021]DEYEC[+57.021]VC[+57.021]NC[+57.021]AN[+2715.963]STVSC[+57.021]PLGYLASTTTNDC[+57.021]GC[+57.021]TTTTC[+57.021]LPDK.V-NeuAc(2)Fuc(1)Hex(6)HexNAc(5)	-5.46787	-6.45557	-0.866483	-5.85681	-6.01733	>tr|F5XVB8|F5XVB8_RABIT von Willebrand factor OS=Oryctolagus cuniculus OX=9986 GN=VWF PE=2 SV=1
3	K.TLPEPC[+57.021]HFKIYSGVDFGGEELN[+1914.697]VTFVK.G-Fuc(2)Hex(5)HexNAc(4)	-5.98916	-5.58202	-0.866483	-5.65094	-5.59052	>tr|G1T127|G1T127_RABIT Kallikrein B1 OS=Oryctolagus cuniculus OX=9986 GN=KLKB1 PE=4 SV=2
3	K.TLQALEFHTVPLRLLAQYRGLN[+1241.454]LTDDAYAPR.I-Fuc(1)Hex(3)HexNAc(3)	-5.41694	-5.66201	-0.361877	-5.87725	-5.54459	>tr|G1TFU9|G1TFU9_RABIT Galectin-3-binding protein OS=Oryctolagus cuniculus OX=9986 GN=LGALS3BP PE=4 SV=2
3	K.TN[+1054.370]R.T-Hex(4)HexNAc(2)	-5.77884	-5.7179	-0.837983	-5.98125	-5.50362	>tr|A0A4Z2DIC3|A0A4Z2DIC3_SCHJA Phosphatidylinositol-binding clathrin assembly protein (Fragment) OS=Schistosoma japonicum OX=6182 GN=EWB00_000622 PE=3 SV=1
3	K.TN[+1216.423]R.T-Hex(5)HexNAc(2)	-5.3036	-5.76364	-0.837983	-6.90024	-5.37939	>tr|A0A4Z2DIC3|A0A4Z2DIC3_SCHJA Phosphatidylinositol-binding clathrin assembly protein (Fragment) OS=Schistosoma japonicum OX=6182 GN=EWB00_000622 PE=3 SV=1
3	K.TN[+2569.905]R.T-NeuAc(2)Hex(6)HexNAc(5)	-5.8736	-5.97392	-0.837983	-5.50817	-5.5822	>tr|A0A4Z2DIC3|A0A4Z2DIC3_SCHJA Phosphatidylinositol-binding clathrin assembly protein (Fragment) OS=Schistosoma japonicum OX=6182 GN=EWB00_000622 PE=3 SV=1
3	K.TN[+3007.058]R.T-NeuAc(3)Fuc(1)Hex(6)HexNAc(5)	-6.05684	-5.99016	-0.837983	-5.72606	-5.83001	>tr|A0A4Z2DIC3|A0A4Z2DIC3_SCHJA Phosphatidylinositol-binding clathrin assembly protein (Fragment) OS=Schistosoma japonicum OX=6182 GN=EWB00_000622 PE=3 SV=1
3	K.TN[+4028.418]R.T-NeuAc(4)Fuc(1)Hex(8)HexNAc(7)	-5.71982	-5.53414	-0.837983	-5.87437	-5.82054	>tr|A0A4Z2DIC3|A0A4Z2DIC3_SCHJA Phosphatidylinositol-binding clathrin assembly protein (Fragment) OS=Schistosoma japonicum OX=6182 GN=EWB00_000622 PE=3 SV=1
3	K.TPQNSADC[+57.021]TYN[+2076.750]LSSTLTLTSTQYNSHK.E-Fuc(2)Hex(6)HexNAc(4)	-5.98248	-6.72146	-0.837983	-5.94323	-5.9568	>tr|A0A1Y1BBR2|A0A1Y1BBR2_RABIT IgG light chain (Fragment) OS=Oryctolagus cuniculus OX=9986 PE=2 SV=1
3	K.VC[+57.021]EIPFN[+1227.439]STNK.F-Pent(1)Hex(3)HexNAc(3)	-5.79717	-6.20815	-0.837983	-5.845	-6.42216	>sp|P27112|ATP4A_RABIT Potassium-transporting ATPase alpha chain 1 OS=Oryctolagus cuniculus OX=9986 GN=ATP4A PE=2 SV=3
3	K.VEAAQN[+2059.735]LTVPGSLR.A-NeuAc(1)Fuc(1)Hex(5)HexNAc(4)	-5.92945	-6.0419	0.0658091268458056	-6.26019	-5.97428	>tr|A0A5F9DC52|A0A5F9DC52_RABIT Tenascin C OS=Oryctolagus cuniculus OX=9986 GN=TNC PE=3 SV=1
3	K.VEAAQN[+2350.830]LTVPGSLR.A-NeuAc(2)Fuc(1)Hex(5)HexNAc(4)	-5.75602	-6.13747	-0.119249	-5.87836	-5.96693	>tr|A0A5F9DC52|A0A5F9DC52_RABIT Tenascin C OS=Oryctolagus cuniculus OX=9986 GN=TNC PE=3 SV=1
3	K.VLNQELRPDGTVNQIEGQATQSN[+2059.735]LTEPAK.L-NeuAc(1)Fuc(1)Hex(5)HexNAc(4)	0.662441513709187	0.309466620067843	1.02664016871553	-0.261715	0.472630245600012	>sp|P37153|APOD_RABIT Apolipoprotein D OS=Oryctolagus cuniculus OX=9986 GN=APOD PE=2 SV=1
3	K.VLNQELRPDGTVNQIEGQATQSN[+2206.813]LTEPAK.L-Fuc(4)Hex(5)HexNAc(4)	-5.87737	-6.07418	-0.866483	-5.83094	-5.49116	>sp|P37153|APOD_RABIT Apolipoprotein D OS=Oryctolagus cuniculus OX=9986 GN=APOD PE=2 SV=1
3	K.VLNQELRPDGTVNQIEGQATQSN[+4028.418]LTEPAK.L-NeuAc(4)Fuc(1)Hex(8)HexNAc(7)	-6.67193	-5.84909	-0.866483	-6.19914	-6.09888	>sp|P37153|APOD_RABIT Apolipoprotein D OS=Oryctolagus cuniculus OX=9986 GN=APOD PE=2 SV=1
3	K.VN[+2204.772]LTVWDFPLRK.T-NeuAc(2)Hex(5)HexNAc(4)	-5.56268	-6.24676	-0.299481	-6.23161	-6.44898	>tr|G1SYK4|G1SYK4_RABIT Uncharacterized protein OS=Oryctolagus cuniculus OX=9986 PE=4 SV=2
3	K.VSN[+1897.682]QTLSLSFTVVQEIPVIDLKPAIVK.V-NeuAc(1)Fuc(1)Hex(4)HexNAc(4)	-5.8609	-5.66144	-0.866483	-6.09414	-5.99051	>tr|A0A5F9CQC0|A0A5F9CQC0_RABIT Alpha-2-macroglobulin OS=Oryctolagus cuniculus OX=9986 GN=A2M PE=3 SV=1
3	K.VSN[+1913.677]QTLSLSFTVVQDIPVIDLKPAIVK.V-NeuAc(1)Hex(5)HexNAc(4)	1.39479704871036	2.20590217526888	3.27541080976582	2.25361349945838	2.08057450506201	>tr|G1SQ70|G1SQ70_RABIT Alpha-2-macroglobulin OS=Oryctolagus cuniculus OX=9986 GN=A2M PE=3 SV=3
3	K.VSN[+1914.697]QTLSLSFTVVQDIPVIDLKPAIVK.V-Fuc(2)Hex(5)HexNAc(4)	0.509014489707279	0.0313484800569794	0.89971025629515	-0.416012	0.25919478504546	>tr|G1SQ70|G1SQ70_RABIT Alpha-2-macroglobulin OS=Oryctolagus cuniculus OX=9986 GN=A2M PE=3 SV=3
3	K.VSPESLQILTN[+2407.852]KTLSFSFLVEQDIQIENLK.P-NeuAc(2)Hex(5)HexNAc(5)	-6.14605	-6.17798	-0.852159	-6.29838	-5.84615	>tr|A0A5F9DH12|A0A5F9DH12_RABIT Uncharacterized protein OS=Oryctolagus cuniculus OX=9986 PE=3 SV=1
3	K.VTIC[+57.021]HSPQQN[+714.269]STLSKMASINADFAFNLYR.R-Fuc(1)Hex(1)HexNAc(2)	-5.96117	-5.7942	-0.361877	-6.24182	-5.74437	>tr|A0A5F9D253|A0A5F9D253_RABIT Serpin family A member 7 OS=Oryctolagus cuniculus OX=9986 GN=SERPINA7 PE=3 SV=1
3	K.VTMPKIITFLEEEVN[+1872.651]VSVC[+57.021]GIYTYGKAVPGHVTMK.I-NeuAc(1)Hex(6)HexNAc(3)	-5.76557	-6.2183	0.411902391297678	-6.24128	-6.13935	>tr|G1SQ70|G1SQ70_RABIT Alpha-2-macroglobulin OS=Oryctolagus cuniculus OX=9986 GN=A2M PE=3 SV=3
3	K.VTMPKIITFLEEEVN[+2206.813]VSVC[+57.021]GIYTYGKAVPGHVTMK.I-Fuc(4)Hex(5)HexNAc(4)	-5.68533	-5.9227	-0.837983	-5.42781	-5.71705	>tr|G1SQ70|G1SQ70_RABIT Alpha-2-macroglobulin OS=Oryctolagus cuniculus OX=9986 GN=A2M PE=3 SV=3
3	K.VVLHPN[+1548.545]YSEVDIGLIK.L-NeuAc(1)Hex(4)HexNAc(3)	-5.65951	-5.66251	-0.837983	-6.00402	-6.52534	>tr|G1SWF6|G1SWF6_RABIT Haptoglobin OS=Oryctolagus cuniculus OX=9986 PE=3 SV=1
3	K.VVLHPN[+1622.582]YSEVDIGLIK.L-Hex(5)HexNAc(4)	-5.66642	-6.09303	-0.591287	-5.73061	-6.12554	>tr|G1SWF6|G1SWF6_RABIT Haptoglobin OS=Oryctolagus cuniculus OX=9986 PE=3 SV=1
3	K.VVLHPN[+1872.651]YSEVDIGLIK.L-NeuAc(1)Hex(6)HexNAc(3)	-5.93678	-5.64753	-0.837983	-6.96978	-6.00014	>tr|G1SWF6|G1SWF6_RABIT Haptoglobin OS=Oryctolagus cuniculus OX=9986 PE=3 SV=1
3	K.VVLHPN[+1913.677]YSEVDIGLIK.L-NeuAc(1)Hex(5)HexNAc(4)	-0.00472454	0.260212442076787	1.54823147564062	-0.657968	0.441108450760402	>sp|P19007|HPT_RABIT Haptoglobin OS=Oryctolagus cuniculus OX=9986 GN=HP PE=1 SV=2
3	K.VVLHPN[+2424.867]YSEVDIGLIK.L-NeuAc(1)Fuc(1)Hex(6)HexNAc(5)	-5.70055	-5.62994	0.546424598772206	-6.41296	-5.63305	>tr|G1SWF6|G1SWF6_RABIT Haptoglobin OS=Oryctolagus cuniculus OX=9986 PE=3 SV=1
3	K.VVLHPN[+2569.905]YSEVDIGLIK.L-NeuAc(2)Hex(6)HexNAc(5)	0.852726368819147	0.914730744193207	2.05575512195581	1.87729657650549	1.50073180238698	>sp|P19007|HPT_RABIT Haptoglobin OS=Oryctolagus cuniculus OX=9986 GN=HP PE=1 SV=2
3	K.VVLHPN[+3007.058]YSEVDIGLIK.L-NeuAc(3)Fuc(1)Hex(6)HexNAc(5)	-6.48658	-5.93526	0.0706913138275425	-5.77091	-6.03753	>tr|G1SWF6|G1SWF6_RABIT Haptoglobin OS=Oryctolagus cuniculus OX=9986 PE=3 SV=1
3	K.VVLHPN[+3663.286]YSEVDIGLIK.L-NeuAc(4)Fuc(1)Hex(7)HexNAc(6)	-5.89473	-5.73403	0.115691052274908	-5.62246	-5.70462	>tr|G1SWF6|G1SWF6_RABIT Haptoglobin OS=Oryctolagus cuniculus OX=9986 PE=3 SV=1
3	K.WSSSYPHKPN[+892.317]FTPK.K-Hex(3)HexNAc(2)	-5.7678	-6.03011	-0.866483	-6.37105	-5.68946	>tr|G1U9Q9|G1U9Q9_RABIT Plasminogen OS=Oryctolagus cuniculus OX=9986 GN=PLG PE=3 SV=2
3	K.WVPVPMMTMEDFATPYFRDQELSC[+57.021]TVVQLNYLGN[+1751.624]ASAFFILPDEGK.M-NeuAc(1)Hex(4)HexNAc(4)	-5.7645	-5.66111	-0.852159	-6.30836	-6.90121	>tr|G1TM88|G1TM88_RABIT Serpin family A member 3 OS=Oryctolagus cuniculus OX=9986 GN=SERPINA3 PE=3 SV=2
3	K.YFPDVTVTWEVDGTTQTTGIENSKTPQNSADC[+57.021]TYN[+3517.228]LSSTLTLTSTQYNSHK.E-NeuAc(4)Hex(7)HexNAc(6)	-5.91156	-6.69242	-0.837983	-6.45982	-6.02869	>tr|A0A1Y1BBR2|A0A1Y1BBR2_RABIT IgG light chain (Fragment) OS=Oryctolagus cuniculus OX=9986 PE=2 SV=1
3	K.YKISETGHDIALIQLQAPLN[+1622.582]DTDIQKPIC[+57.021]LPSK.D-Hex(5)HexNAc(4)	-6.37571	-5.91759	-0.866483	-5.813	-5.90978	>tr|G1T127|G1T127_RABIT Kallikrein B1 OS=Oryctolagus cuniculus OX=9986 GN=KLKB1 PE=4 SV=2
3	K.YLN[+1913.677]ETQQLTPELK.S-NeuAc(1)Hex(5)HexNAc(4)	-0.2205	0.0157761487075127	0.705141024801227	-0.190043	-0.299272	>tr|A0A5F9DI97|A0A5F9DI97_RABIT Uncharacterized protein OS=Oryctolagus cuniculus OX=9986 PE=3 SV=1
3	K.YLN[+1914.697]ETQQLTPELK.S-Fuc(2)Hex(5)HexNAc(4)	-6.11951	-6.03345	-0.361877	-5.92011	-6.27205	>tr|A0A5F9DI97|A0A5F9DI97_RABIT Uncharacterized protein OS=Oryctolagus cuniculus OX=9986 PE=3 SV=1
3	K.YN[+2756.989]KSFLK.C-NeuAc(2)Fuc(1)Hex(5)HexNAc(6)	-6.00191	-6.13155	-0.866483	-5.8708	-6.3437	>tr|A0A5F9DBJ1|A0A5F9DBJ1_RABIT Actin-depolymerizing factor OS=Oryctolagus cuniculus OX=9986 GN=GSN PE=3 SV=1
3	K.YTDHEN[+1913.677]GTGTNIYK.A-NeuAc(1)Hex(5)HexNAc(4)	-0.663772	-0.435018	0.0476300521182762	-0.0150889	-0.70885	>tr|G1SS66|G1SS66_RABIT C3/C5 convertase OS=Oryctolagus cuniculus OX=9986 GN=C2 PE=4 SV=2
3	K.YVMLPVADQDKC[+57.021]IQHYEN[+2245.799]STVPENK.I-NeuAc(2)Hex(4)HexNAc(5)	-5.95573	-6.2678	-0.837983	-6.46126	-5.72246	>tr|G1SWF6|G1SWF6_RABIT Haptoglobin OS=Oryctolagus cuniculus OX=9986 PE=3 SV=1
3	K.YVMLPVADQDKC[+57.021]IQHYEN[+2247.840]STVPENK.I-Fuc(4)Hex(4)HexNAc(5)	-5.85438	-5.82794	-0.866483	-6.14157	-6.14919	>tr|G1SWF6|G1SWF6_RABIT Haptoglobin OS=Oryctolagus cuniculus OX=9986 PE=3 SV=1
3	R.AIINDWISN[+1914.697]K.T-Fuc(2)Hex(5)HexNAc(4)	-6.55018	-5.88504	-0.837983	-5.48445	-5.66434	>tr|G1SIK0|G1SIK0_RABIT Antithrombin-III OS=Oryctolagus cuniculus OX=9986 GN=SERPINC1 PE=3 SV=1
3	R.AIINDWISN[+2059.735]K.T-NeuAc(1)Fuc(1)Hex(5)HexNAc(4)	-6.24434	-6.09052	-0.361877	-5.71487	-6.57327	>tr|G1SIK0|G1SIK0_RABIT Antithrombin-III OS=Oryctolagus cuniculus OX=9986 GN=SERPINC1 PE=3 SV=1
3	R.AIINDWISN[+2204.772]KTEGHIR.D-NeuAc(2)Hex(5)HexNAc(4)	-5.95093	-6.30128	-0.837983	-6.72462	-6.15306	>tr|G1SIK0|G1SIK0_RABIT Antithrombin-III OS=Oryctolagus cuniculus OX=9986 GN=SERPINC1 PE=3 SV=1
3	R.AIINDWISN[+2350.830]K.T-NeuAc(2)Fuc(1)Hex(5)HexNAc(4)	-0.667458	-0.599015	-0.313519	-0.79502	-0.684957	>tr|G1SIK0|G1SIK0_RABIT Antithrombin-III OS=Oryctolagus cuniculus OX=9986 GN=SERPINC1 PE=3 SV=1
3	R.ALGFQN[+2059.735]ATEALGR.A-NeuAc(1)Fuc(1)Hex(5)HexNAc(4)	-5.92352	-5.5621	-0.361877	-5.8438	-5.64197	>tr|G1TFU9|G1TFU9_RABIT Galectin-3-binding protein OS=Oryctolagus cuniculus OX=9986 GN=LGALS3BP PE=4 SV=2
3	R.ALGFQN[+2060.755]ATEALGR.A-Fuc(3)Hex(5)HexNAc(4)	-5.48432	-6.65737	-0.361877	-5.83679	-6.23953	>tr|G1TFU9|G1TFU9_RABIT Galectin-3-binding protein OS=Oryctolagus cuniculus OX=9986 GN=LGALS3BP PE=4 SV=2
3	R.ALGFQN[+2424.867]ATEALGR.A-NeuAc(1)Fuc(1)Hex(6)HexNAc(5)	-6.48129	-6.1216	-0.361877	-6.01015	-5.96796	>tr|G1TFU9|G1TFU9_RABIT Galectin-3-binding protein OS=Oryctolagus cuniculus OX=9986 GN=LGALS3BP PE=4 SV=2
3	R.ALGFQN[+2715.963]ATEALGR.A-NeuAc(2)Fuc(1)Hex(6)HexNAc(5)	-5.83328	-5.4178	-0.361877	-6.35476	-5.60847	>tr|G1TFU9|G1TFU9_RABIT Galectin-3-binding protein OS=Oryctolagus cuniculus OX=9986 GN=LGALS3BP PE=4 SV=2
3	R.ALGFQN[+3007.058]ATEALGR.A-NeuAc(3)Fuc(1)Hex(6)HexNAc(5)	-6.01804	-5.85451	0.593173151808632	-6.51154	-6.29885	>tr|G1TFU9|G1TFU9_RABIT Galectin-3-binding protein OS=Oryctolagus cuniculus OX=9986 GN=LGALS3BP PE=4 SV=2
3	R.ALVTSQN[+1913.677]ETK.A-NeuAc(1)Hex(5)HexNAc(4)	-6.18689	-6.35089	-0.837983	-6.13504	-6.18765	>tr|G1TY29|G1TY29_RABIT Uncharacterized protein OS=Oryctolagus cuniculus OX=9986 GN=ITIH4 PE=4 SV=2
3	R.ALVTSQN[+2717.978]ETKAHIR.F-Hex(8)HexNAc(7)	-6.12173	-5.77206	-0.866483	-5.8964	-5.98815	>tr|G1TY29|G1TY29_RABIT Uncharacterized protein OS=Oryctolagus cuniculus OX=9986 GN=ITIH4 PE=4 SV=2
3	R.ANN[+1913.677]C[+57.021]TYFFGDIVVYSC[+57.021]YQK.Q-NeuAc(1)Hex(5)HexNAc(4)	-6.00274	-6.13642	-0.361877	-6.18565	-5.78895	>tr|A0A5F9CJA1|A0A5F9CJA1_RABIT Uncharacterized protein OS=Oryctolagus cuniculus OX=9986 PE=4 SV=1
3	R.ASQN[+1702.581]ITYHC[+57.021]K.N-Hex(8)HexNAc(2)	-5.8854	-6.13989	-0.837983	-5.51749	-6.152	>tr|G1T8J0|G1T8J0_RABIT Collagen type III alpha 1 chain OS=Oryctolagus cuniculus OX=9986 GN=COL3A1 PE=4 SV=2
3	R.C[+57.021]N[+1710.598]YSIR.V-NeuAc(1)Hex(5)HexNAc(3)	-0.557013	-6.0474	0.0870922090334206	-5.9574	-5.76637	>tr|G1T7H9|G1T7H9_RABIT Complement C1r OS=Oryctolagus cuniculus OX=9986 GN=C1R PE=4 SV=2
3	R.C[+57.021]VN[+2350.830]GTC[+57.021]YC[+57.021]EEGFTGEDC[+57.021]GK.L-NeuAc(2)Fuc(1)Hex(5)HexNAc(4)	-5.79688	-5.99321	-0.299481	-5.92302	-6.07111	>tr|A0A5F9DC52|A0A5F9DC52_RABIT Tenascin C OS=Oryctolagus cuniculus OX=9986 GN=TNC PE=3 SV=1
3	R.DLRVSFPVDSELPPN[+1444.534]VSVFIPPR.D-Fuc(1)Hex(3)HexNAc(4)	-6.49436	-6.3476	-0.361877	-6.10384	-6.14438	>sp|P03988|IGHM_RABIT Ig mu chain C region secreted form OS=Oryctolagus cuniculus OX=9986 PE=2 SV=1
3	R.DLRVSFPVDSELPPN[+1710.598]VSVFIPPR.D-NeuAc(1)Hex(5)HexNAc(3)	-6.02986	-6.18022	-0.866483	-6.23441	-5.37728	>sp|P03988|IGHM_RABIT Ig mu chain C region secreted form OS=Oryctolagus cuniculus OX=9986 PE=2 SV=1
3	R.DSETKLKAFPEVC[+57.021]N[+1403.507]ETMMALWEEC[+57.021]KPC[+57.021]LK.Q-Fuc(1)Hex(4)HexNAc(3)	-6.06462	-5.78558	0.593173151808632	-6.15551	-5.43602	>sp|Q9XSC5|CLUS_RABIT Clusterin OS=Oryctolagus cuniculus OX=9986 GN=CLU PE=2 SV=1
3	R.DSETKLKAFPEVC[+57.021]N[+2059.735]ETMMALWEEC[+57.021]KPC[+57.021]LK.Q-NeuAc(1)Fuc(1)Hex(5)HexNAc(4)	-6.74159	-5.61976	-0.361877	-5.64518	-5.80143	>sp|Q9XSC5|CLUS_RABIT Clusterin OS=Oryctolagus cuniculus OX=9986 GN=CLU PE=2 SV=1
3	R.DTGN[+1913.677]HTVC[+57.021]QEDLC[+57.021]C[+57.021]HLTYK.M-NeuAc(1)Hex(5)HexNAc(4)	-6.20225	-6.10704	-0.837983	-5.93712	-6.46211	>tr|A0A5F9D1G8|A0A5F9D1G8_RABIT CN hydrolase domain-containing protein OS=Oryctolagus cuniculus OX=9986 PE=3 SV=1
3	R.DTGN[+2204.772]HTVC[+57.021]QEDLC[+57.021]C[+57.021]HLTYK.M-NeuAc(2)Hex(5)HexNAc(4)	-5.5373	-6.3076	0.89971025629515	-6.3343	-6.24173	>tr|A0A5F9D1G8|A0A5F9D1G8_RABIT CN hydrolase domain-containing protein OS=Oryctolagus cuniculus OX=9986 PE=3 SV=1
3	R.EAAAAMC[+57.021]EEEDSTALVC[+57.021]DN[+3663.286]GSGLC[+57.021]K.A-NeuAc(4)Fuc(1)Hex(7)HexNAc(6)	-6.26165	-5.87709	-0.837983	-6.20953	-5.63268	>tr|A0A0A0MQP7|A0A0A0MQP7_RABIT Actin, aortic smooth muscle OS=Oryctolagus cuniculus OX=9986 GN=ACTA2 PE=3 SV=1
3	R.EGHFYYN[+1913.677]ISDVK.V-NeuAc(1)Hex(5)HexNAc(4)	-6.39162	-5.60322	-0.866483	-5.91182	-6.04766	>tr|A0A5F9CJ45|A0A5F9CJ45_RABIT Phospholipid transfer protein OS=Oryctolagus cuniculus OX=9986 GN=PLTP PE=3 SV=1
3	R.EIC[+57.021]EEQVNSLAASIN[+1914.697]K.S-Fuc(2)Hex(5)HexNAc(4)	-5.75578	-5.5088	-0.837983	-6.0915	-5.83104	>tr|G1STJ4|G1STJ4_RABIT Complement C3 alpha chain OS=Oryctolagus cuniculus OX=9986 PE=4 SV=3
3	R.ELN[+1548.545]YTR.Q-NeuAc(1)Hex(4)HexNAc(3)	-0.629762	-0.646255	-0.361877	-0.657968	-0.700839	>tr|G1SIS0|G1SIS0_RABIT Patched 1 OS=Oryctolagus cuniculus OX=9986 GN=PTCH1 PE=3 SV=3
3	R.ELN[+730.264]YTR.Q-Hex(2)HexNAc(2)	-6.07137	-6.18212	-0.866483	-5.92662	-6.39791	>tr|G1SIS0|G1SIS0_RABIT Patched 1 OS=Oryctolagus cuniculus OX=9986 GN=PTCH1 PE=3 SV=3
3	R.EN[+1298.476]R.S-Hex(3)HexNAc(4)	-5.96496	-6.07707	-0.866483	-6.37059	-5.92089	>tr|A0A5F9CNX4|A0A5F9CNX4_RABIT Alpha-2-macroglobulin OS=Oryctolagus cuniculus OX=9986 GN=A2M PE=3 SV=1
3	R.EN[+1378.476]ISDPTSPLR.T-Hex(6)HexNAc(2)	-6.03975	-6.32046	-0.852159	-6.30995	-6.24884	>sp|P23108|IGJ_RABIT Immunoglobulin J chain OS=Oryctolagus cuniculus OX=9986 GN=JCHAIN PE=1 SV=1
3	R.EN[+1444.534]ISDPTSPLR.T-Fuc(1)Hex(3)HexNAc(4)	-5.73857	-6.75942	-0.866483	-6.07319	-6.4633	>sp|P23108|IGJ_RABIT Immunoglobulin J chain OS=Oryctolagus cuniculus OX=9986 GN=JCHAIN PE=1 SV=1
3	R.EN[+1460.529]ISDPTSPLR.T-Hex(4)HexNAc(4)	-5.96846	-6.13528	-0.579538	-5.72341	-6.05727	>sp|P23108|IGJ_RABIT Immunoglobulin J chain OS=Oryctolagus cuniculus OX=9986 GN=JCHAIN PE=1 SV=1
3	R.EN[+1501.555]ISDPTSPLR.T-Hex(3)HexNAc(5)	-6.05608	-5.89368	0.593173151808632	-0.755305	-5.69514	>sp|P23108|IGJ_RABIT Immunoglobulin J chain OS=Oryctolagus cuniculus OX=9986 GN=JCHAIN PE=1 SV=1
3	R.EN[+1540.529]ISDPTSPLR.T-Hex(7)HexNAc(2)	-6.96396	-6.10469	-0.668729	-5.55058	-5.83586	>sp|P23108|IGJ_RABIT Immunoglobulin J chain OS=Oryctolagus cuniculus OX=9986 GN=JCHAIN PE=1 SV=1
3	R.EN[+1647.613]ISDPTSPLR.T-Fuc(1)Hex(3)HexNAc(5)	-0.563901	-6.13578	0.546424598772206	-0.755305	-5.77345	>sp|P23108|IGJ_RABIT Immunoglobulin J chain OS=Oryctolagus cuniculus OX=9986 GN=JCHAIN PE=1 SV=1
3	R.EN[+1702.581]ISDPTSPLR.T-Hex(8)HexNAc(2)	-6.12204	-5.92953	0.399691652823889	0.302186910798418	-6.12594	>sp|P23108|IGJ_RABIT Immunoglobulin J chain OS=Oryctolagus cuniculus OX=9986 GN=JCHAIN PE=1 SV=1
3	R.EN[+1752.645]ISDPTSPLR.T-Fuc(2)Hex(4)HexNAc(4)	-6.1318	-5.60202	-0.837983	-5.71742	-5.89192	>sp|P23108|IGJ_RABIT Immunoglobulin J chain OS=Oryctolagus cuniculus OX=9986 GN=JCHAIN PE=1 SV=1
3	R.EN[+1850.693]ISDPTSPLR.T-Fuc(1)Hex(3)HexNAc(6)	-5.85102	-5.93452	-0.591287	-6.04929	-6.20781	>sp|P23108|IGJ_RABIT Immunoglobulin J chain OS=Oryctolagus cuniculus OX=9986 GN=JCHAIN PE=1 SV=1
3	R.EN[+1864.634]ISDPTSPLR.T-Hex(9)HexNAc(2)	-5.54374	-6.076	0.0870922090334206	-5.76286	-5.68304	>sp|P23108|IGJ_RABIT Immunoglobulin J chain OS=Oryctolagus cuniculus OX=9986 GN=JCHAIN PE=1 SV=1
3	R.EN[+1872.651]R.S-NeuAc(1)Hex(6)HexNAc(3)	-5.70357	-5.68413	-0.837983	-6.60212	-5.77091	>tr|A0A5F9CQC0|A0A5F9CQC0_RABIT Alpha-2-macroglobulin OS=Oryctolagus cuniculus OX=9986 GN=A2M PE=3 SV=1
3	R.EN[+1913.677]GTLSK.H-NeuAc(1)Hex(5)HexNAc(4)	-5.62616	-5.33309	-0.866483	-6.18973	-6.66915	>sp|P25227|A1AG_RABIT Alpha-1-acid glycoprotein OS=Oryctolagus cuniculus OX=9986 GN=ORM1 PE=2 SV=1
3	R.EN[+1987.714]ISDPTSPLR.T-Hex(6)HexNAc(5)	-6.04177	-6.00236	0.593173151808632	-5.707	-6.22913	>sp|P23108|IGJ_RABIT Immunoglobulin J chain OS=Oryctolagus cuniculus OX=9986 GN=JCHAIN PE=1 SV=1
3	R.EN[+2190.793]ISDPTSPLR.T-Hex(6)HexNAc(6)	-6.09159	-5.87145	0.593173151808632	-6.15152	-5.97047	>sp|P23108|IGJ_RABIT Immunoglobulin J chain OS=Oryctolagus cuniculus OX=9986 GN=JCHAIN PE=1 SV=1
3	R.EN[+2204.772]GTLSK.H-NeuAc(2)Hex(5)HexNAc(4)	-6.17526	-5.6831	-0.0364198	-6.45913	-5.80987	>sp|P25227|A1AG_RABIT Alpha-1-acid glycoprotein OS=Oryctolagus cuniculus OX=9986 GN=ORM1 PE=2 SV=1
3	R.EN[+2278.809]GTLSK.H-NeuAc(1)Hex(6)HexNAc(5)	-5.87635	-5.64012	-0.866483	-6.16895	-6.14303	>sp|P25227|A1AG_RABIT Alpha-1-acid glycoprotein OS=Oryctolagus cuniculus OX=9986 GN=ORM1 PE=2 SV=1
3	R.EN[+2350.830]ISDPTSPLR.T-NeuAc(2)Fuc(1)Hex(5)HexNAc(4)	-6.07838	-6.61767	-0.361877	-5.6494	-5.92376	>sp|P23108|IGJ_RABIT Immunoglobulin J chain OS=Oryctolagus cuniculus OX=9986 GN=JCHAIN PE=1 SV=1
3	R.EN[+2407.852]ISDPTSPLR.T-NeuAc(2)Hex(5)HexNAc(5)	-5.37786	-6.34699	-0.28996	-5.39347	-5.82619	>sp|P23108|IGJ_RABIT Immunoglobulin J chain OS=Oryctolagus cuniculus OX=9986 GN=JCHAIN PE=1 SV=1
3	R.EN[+2457.877]GTLSK.H-Fuc(1)Hex(8)HexNAc(5)	-6.23365	-6.09123	-0.361877	-6.07972	-6.17965	>sp|P25227|A1AG_RABIT Alpha-1-acid glycoprotein OS=Oryctolagus cuniculus OX=9986 GN=ORM1 PE=2 SV=1
3	R.EN[+2498.904]ISDPTSPLR.T-Fuc(1)Hex(7)HexNAc(6)	-6.1264	-5.43026	-0.361877	-5.80475	-6.0273	>sp|P23108|IGJ_RABIT Immunoglobulin J chain OS=Oryctolagus cuniculus OX=9986 GN=JCHAIN PE=1 SV=1
3	R.EN[+2569.905]GTLSK.H-NeuAc(2)Hex(6)HexNAc(5)	-6.30652	-5.95745	0.72162972119715	-5.71337	-5.84586	>sp|P25227|A1AG_RABIT Alpha-1-acid glycoprotein OS=Oryctolagus cuniculus OX=9986 GN=ORM1 PE=2 SV=1
3	R.EN[+2569.905]ISDPTSPLR.T-NeuAc(2)Hex(6)HexNAc(5)	-5.63451	-5.9723	-0.866483	-4.91269	-6.06579	>sp|P23108|IGJ_RABIT Immunoglobulin J chain OS=Oryctolagus cuniculus OX=9986 GN=JCHAIN PE=1 SV=1
3	R.EN[+2569.905]R.S-NeuAc(2)Hex(6)HexNAc(5)	-6.53993	-5.97036	-0.837983	-6.23313	-6.06916	>tr|A0A5F9CQC0|A0A5F9CQC0_RABIT Alpha-2-macroglobulin OS=Oryctolagus cuniculus OX=9986 GN=A2M PE=3 SV=1
3	R.EN[+3517.228]R.S-NeuAc(4)Hex(7)HexNAc(6)	-5.99535	-5.61755	-0.837983	-6.18642	-6.04892	>tr|G1SQ70|G1SQ70_RABIT Alpha-2-macroglobulin OS=Oryctolagus cuniculus OX=9986 GN=A2M PE=3 SV=3
3	R.EQQFN[+1241.454]STIR.V-Fuc(1)Hex(3)HexNAc(3)	-0.166109	-0.646255	0.568310312773358	0.394412593686666	-0.700839	>tr|G1THZ6|G1THZ6_RABIT Immunoglobulin heavy constant mu OS=Oryctolagus cuniculus OX=9986 GN=IGHM PE=4 SV=3
3	R.EQQFN[+1257.449]STIR.V-Hex(4)HexNAc(3)	-0.166109	-0.646255	0.564905596046571	-0.657968	-0.299272	>tr|G1THZ6|G1THZ6_RABIT Immunoglobulin heavy constant mu OS=Oryctolagus cuniculus OX=9986 GN=IGHM PE=4 SV=3
3	R.EQQFN[+1403.507]STIR.V-Fuc(1)Hex(4)HexNAc(3)	-0.560453	-0.745832	0.189845951681046	-0.416012	-0.758977	>tr|G1THZ6|G1THZ6_RABIT Immunoglobulin heavy constant mu OS=Oryctolagus cuniculus OX=9986 GN=IGHM PE=4 SV=3
3	R.EQQFN[+1460.529]STIR.V-Hex(4)HexNAc(4)	1.73516982329189	0.842401665401152	2.97923658511636	2.33311335435283	1.89170790947875	>tr|G1THZ6|G1THZ6_RABIT Immunoglobulin heavy constant mu OS=Oryctolagus cuniculus OX=9986 GN=IGHM PE=4 SV=3
3	R.EQQFN[+1606.587]STIR.V-Fuc(1)Hex(4)HexNAc(4)	0.66139798864893	0.0231948303368528	2.18572742816204	1.63792870272129	1.18803132515653	>tr|G1THZ6|G1THZ6_RABIT Immunoglobulin heavy constant mu OS=Oryctolagus cuniculus OX=9986 GN=IGHM PE=4 SV=3
3	R.EQQFN[+1622.582]STIR.V-Hex(5)HexNAc(4)	0.145805118190613	-0.191466	1.83956318757405	1.17736454904858	0.4655609496846	>tr|G1THZ6|G1THZ6_RABIT Immunoglobulin heavy constant mu OS=Oryctolagus cuniculus OX=9986 GN=IGHM PE=4 SV=3
3	R.EQQFN[+1647.613]STIR.V-Fuc(1)Hex(3)HexNAc(5)	0.406579450070963	0.315478223114547	0.84471840649764	0.481386009463258	0.4655609496846	>tr|G1THZ6|G1THZ6_RABIT Immunoglobulin heavy constant mu OS=Oryctolagus cuniculus OX=9986 GN=IGHM PE=4 SV=3
3	R.EQQFN[+1710.598]STIR.V-NeuAc(1)Hex(5)HexNAc(3)	-6.4914	-6.47421	0.108596606247865	-5.59261	-5.81587	>tr|G1THZ6|G1THZ6_RABIT Immunoglobulin heavy constant mu OS=Oryctolagus cuniculus OX=9986 GN=IGHM PE=4 SV=3
3	R.EQQFN[+1711.618]STIR.V-Fuc(2)Hex(5)HexNAc(3)	-6.19242	-5.78783	-0.866483	-6.36552	-6.50073	>tr|G1THZ6|G1THZ6_RABIT Immunoglobulin heavy constant mu OS=Oryctolagus cuniculus OX=9986 GN=IGHM PE=4 SV=3
3	R.EQQFN[+1751.624]STIR.V-NeuAc(1)Hex(4)HexNAc(4)	-0.00472454	-0.765241	0.916691371397985	-0.79502	-0.00883865	>tr|G1THZ6|G1THZ6_RABIT Immunoglobulin heavy constant mu OS=Oryctolagus cuniculus OX=9986 GN=IGHM PE=4 SV=3
3	R.EQQFN[+1768.640]STIR.V-Fuc(1)Hex(5)HexNAc(4)	0.188906588243672	0.0813955262550899	1.77334810386334	0.481386009463258	0.222099062710251	>tr|G1THZ6|G1THZ6_RABIT Immunoglobulin heavy constant mu OS=Oryctolagus cuniculus OX=9986 GN=IGHM PE=4 SV=3
3	R.EQQFN[+1913.677]STIR.V-NeuAc(1)Hex(5)HexNAc(4)	-0.167891	0.0884737366968349	1.70230516023217	0.481386009463258	0.444711508381902	>tr|G1THZ6|G1THZ6_RABIT Immunoglobulin heavy constant mu OS=Oryctolagus cuniculus OX=9986 GN=IGHM PE=4 SV=3
3	R.EQQFN[+1971.719]STIR.V-Fuc(1)Hex(5)HexNAc(5)	0.147260225748679	-0.280872	0.787448490247884	0.481386009463258	-0.684957	>tr|G1THZ6|G1THZ6_RABIT Immunoglobulin heavy constant mu OS=Oryctolagus cuniculus OX=9986 GN=IGHM PE=4 SV=3
3	R.EQQFN[+2076.750]STIR.V-Fuc(2)Hex(6)HexNAc(4)	-6.55705	-5.47661	-0.591287	-5.22418	-6.03705	>tr|G1THZ6|G1THZ6_RABIT Immunoglobulin heavy constant mu OS=Oryctolagus cuniculus OX=9986 GN=IGHM PE=4 SV=3
3	R.EQQFN[+2100.761]STIR.V-NeuAc(1)Fuc(1)Hex(4)HexNAc(5)	-6.63184	-5.78452	-0.866483	-6.22172	-6.42083	>tr|G1THZ6|G1THZ6_RABIT Immunoglobulin heavy constant mu OS=Oryctolagus cuniculus OX=9986 GN=IGHM PE=4 SV=3
3	R.EQQFN[+2116.756]STIR.V-NeuAc(1)Hex(5)HexNAc(5)	-0.667458	-0.646255	0.916691371397985	0.302186910798418	-0.116839	>tr|G1THZ6|G1THZ6_RABIT Immunoglobulin heavy constant mu OS=Oryctolagus cuniculus OX=9986 GN=IGHM PE=4 SV=3
3	R.EQQFN[+2262.814]STIR.V-NeuAc(1)Fuc(1)Hex(5)HexNAc(5)	-5.79071	-5.14136	-0.319969	-6.06385	-6.00641	>tr|G1THZ6|G1THZ6_RABIT Immunoglobulin heavy constant mu OS=Oryctolagus cuniculus OX=9986 GN=IGHM PE=4 SV=3
3	R.EQQFN[+2278.809]STIR.V-NeuAc(1)Hex(6)HexNAc(5)	-0.629762	-0.646255	0.84471840649764	-0.576258	-0.299272	>tr|G1THZ6|G1THZ6_RABIT Immunoglobulin heavy constant mu OS=Oryctolagus cuniculus OX=9986 GN=IGHM PE=4 SV=3
3	R.EQQFN[+2279.830]STIR.V-Fuc(2)Hex(6)HexNAc(5)	-5.72777	-5.7846	-0.837983	-5.98415	-6.19026	>tr|G1THZ6|G1THZ6_RABIT Immunoglobulin heavy constant mu OS=Oryctolagus cuniculus OX=9986 GN=IGHM PE=4 SV=3
3	R.EQQFN[+2569.905]STIR.V-NeuAc(2)Hex(6)HexNAc(5)	-6.0588	-6.09878	-0.852159	-6.24274	-5.71343	>tr|G1THZ6|G1THZ6_RABIT Immunoglobulin heavy constant mu OS=Oryctolagus cuniculus OX=9986 GN=IGHM PE=4 SV=3
3	R.EQQFN[+568.212]STIR.V-Hex(1)HexNAc(2)	-6.06205	-6.03914	-0.579538	-6.28046	-6.25834	>tr|G1THZ6|G1THZ6_RABIT Immunoglobulin heavy constant mu OS=Oryctolagus cuniculus OX=9986 GN=IGHM PE=4 SV=3
3	R.ETYPWYN[+2424.867]LTVEAK.E-NeuAc(1)Fuc(1)Hex(6)HexNAc(5)	-6.47717	-6.1642	-0.866483	-5.48702	-5.86058	>tr|G1SYT1|G1SYT1_RABIT Cadherin-5 OS=Oryctolagus cuniculus OX=9986 GN=CDH5 PE=4 SV=3
3	R.EVAHESN[+1914.697]TTNIFFSPVSIALAFAMLSLGAK.G-Fuc(2)Hex(5)HexNAc(4)	-5.9412	-6.65115	-0.361877	-5.81195	-5.86969	>tr|G1TGM8|G1TGM8_RABIT SERPIN domain-containing protein OS=Oryctolagus cuniculus OX=9986 GN=SERPINA1 PE=3 SV=1
3	R.EVAHESN[+2204.772]TTNIFFSPVSIALAFAMLSLGAKGDTHTQVLEGLK.F-NeuAc(2)Hex(5)HexNAc(4)	-5.62046	-5.99983	-0.361877	-5.92932	-6.08211	>tr|G1TGM8|G1TGM8_RABIT SERPIN domain-containing protein OS=Oryctolagus cuniculus OX=9986 GN=SERPINA1 PE=3 SV=1
3	R.EVAHESN[+2352.846]TTNIFFSPVSIALAFAMLSLGAK.G-Hex(7)HexNAc(6)	-5.61661	-5.88342	-0.866483	-6.38053	-5.91849	>tr|G1TGM8|G1TGM8_RABIT SERPIN domain-containing protein OS=Oryctolagus cuniculus OX=9986 GN=SERPINA1 PE=3 SV=1
3	R.EVAHESN[+2861.000]TTNIFFSPVSIALAFAMLSLGAK.G-NeuAc(3)Hex(6)HexNAc(5)	-5.76715	-6.09445	-0.852159	-5.94104	-6.31007	>tr|G1TGM8|G1TGM8_RABIT SERPIN domain-containing protein OS=Oryctolagus cuniculus OX=9986 GN=SERPINA1 PE=3 SV=1
3	R.EYITTN[+1913.677]NTC[+57.021]FYNSSIVR.V-NeuAc(1)Hex(5)HexNAc(4)	-5.91128	-5.94342	0.0550434595798335	-5.80648	-5.75981	>sp|P25227|A1AG_RABIT Alpha-1-acid glycoprotein OS=Oryctolagus cuniculus OX=9986 GN=ORM1 PE=2 SV=1
3	R.EYITTN[+2204.772]NTC[+57.021]FYNSSIVR.V-NeuAc(2)Hex(5)HexNAc(4)	-5.47283	-5.8455	0.0706913138275425	-6.22254	-6.17699	>sp|P25227|A1AG_RABIT Alpha-1-acid glycoprotein OS=Oryctolagus cuniculus OX=9986 GN=ORM1 PE=2 SV=1
3	R.EYITTN[+2407.852]NTC[+57.021]FYNSSIVR.V-NeuAc(2)Hex(5)HexNAc(5)	-5.95148	-6.05107	-0.866483	-6.67406	-5.97639	>sp|P25227|A1AG_RABIT Alpha-1-acid glycoprotein OS=Oryctolagus cuniculus OX=9986 GN=ORM1 PE=2 SV=1
3	R.FDEFFRQGC[+57.021]APGSQKN[+1216.423]SSLC[+57.021]ELC[+57.021]VGPSVC[+57.021]APNNR.E-Hex(5)HexNAc(2)	-6.02178	-5.4079	0.0870922090334206	-6.36277	-5.56402	>sp|P19134|TRFE_RABIT Serotransferrin OS=Oryctolagus cuniculus OX=9986 GN=TF PE=1 SV=4
3	R.FDEFFRQGC[+57.021]APGSQKN[+2116.756]SSLC[+57.021]ELC[+57.021]IGPSVC[+57.021]APNNR.E-NeuAc(1)Hex(5)HexNAc(5)	-5.85533	-6.61684	-0.361877	-5.68874	-5.84605	>tr|G1STF7|G1STF7_RABIT Beta-1 metal-binding globulin OS=Oryctolagus cuniculus OX=9986 PE=3 SV=1
3	R.FDEFFRQGC[+57.021]APGSQKN[+3372.190]SSLC[+57.021]ELC[+57.021]VGPSVC[+57.021]APNNR.E-NeuAc(3)Fuc(1)Hex(7)HexNAc(6)	-6.49563	-6.34421	-0.837983	-6.42467	-5.86291	>sp|P19134|TRFE_RABIT Serotransferrin OS=Oryctolagus cuniculus OX=9986 GN=TF PE=1 SV=4
3	R.FGYILHTDN[+2204.772]R.T-NeuAc(2)Hex(5)HexNAc(4)	-0.560453	0.0157761487075127	0.705141024801227	-0.190043	-0.700839	>tr|G1U128|G1U128_RABIT Mannan binding lectin serine peptidase 1 OS=Oryctolagus cuniculus OX=9986 GN=MASP1 PE=4 SV=3
3	R.FGYILHTDN[+2279.830]R.T-Fuc(2)Hex(6)HexNAc(5)	-6.10954	-6.47067	-0.837983	-6.66874	-5.91058	>tr|A0A5F9D585|A0A5F9D585_RABIT Mannan binding lectin serine peptidase 1 OS=Oryctolagus cuniculus OX=9986 GN=MASP1 PE=4 SV=1
3	R.FGYILHTDN[+2569.905]R.T-NeuAc(2)Hex(6)HexNAc(5)	-5.58556	-6.0145	0.674738268306883	-6.55977	-6.00183	>tr|A0A5F9D585|A0A5F9D585_RABIT Mannan binding lectin serine peptidase 1 OS=Oryctolagus cuniculus OX=9986 GN=MASP1 PE=4 SV=1
3	R.FLFYN[+2861.000]R.S-NeuAc(3)Hex(6)HexNAc(5)	-6.15094	-5.84047	-0.837983	-6.20877	-6.17584	>tr|G1SU36|G1SU36_RABIT Apolipoprotein M OS=Oryctolagus cuniculus OX=9986 GN=APOM PE=3 SV=1
3	R.FN[+1257.449]GSVSFFR.G-Hex(4)HexNAc(3)	-6.39369	-5.70206	-0.866483	-6.1831	-5.9267	>tr|G1T8V2|G1T8V2_RABIT Microfibril associated protein 4 OS=Oryctolagus cuniculus OX=9986 GN=MFAP4 PE=4 SV=2
3	R.FN[+1419.502]GSVSFFR.G-Hex(5)HexNAc(3)	-6.12796	-5.68695	-0.319969	-6.05104	-6.20292	>tr|G1T8V2|G1T8V2_RABIT Microfibril associated protein 4 OS=Oryctolagus cuniculus OX=9986 GN=MFAP4 PE=4 SV=2
3	R.FN[+1540.529]GSVSFFR.G-Hex(7)HexNAc(2)	-0.560453	-0.280872	0.546424598772206	0.06795760654184	-0.672672	>tr|G1T8V2|G1T8V2_RABIT Microfibril associated protein 4 OS=Oryctolagus cuniculus OX=9986 GN=MFAP4 PE=4 SV=2
3	R.FN[+1548.545]GSVSFFR.G-NeuAc(1)Hex(4)HexNAc(3)	-6.27792	-5.98265	-0.102576	-6.13697	-6.13363	>tr|G1T8V2|G1T8V2_RABIT Microfibril associated protein 4 OS=Oryctolagus cuniculus OX=9986 GN=MFAP4 PE=4 SV=2
3	R.FN[+1622.582]GSVSFFR.G-Hex(5)HexNAc(4)	-6.27857	-6.37897	-0.866483	-5.31179	-5.74159	>tr|G1T8V2|G1T8V2_RABIT Microfibril associated protein 4 OS=Oryctolagus cuniculus OX=9986 GN=MFAP4 PE=4 SV=2
3	R.FN[+1913.677]GSVSFFR.G-NeuAc(1)Hex(5)HexNAc(4)	-6.2571	-6.79609	-0.837983	-6.01658	-6.42289	>tr|G1T8V2|G1T8V2_RABIT Microfibril associated protein 4 OS=Oryctolagus cuniculus OX=9986 GN=MFAP4 PE=4 SV=2
3	R.FN[+2204.772]ETHAIANWLLEK.R-NeuAc(2)Hex(5)HexNAc(4)	0.879275747017967	1.0638745809541	1.42975003431673	0.682178849870685	0.795580608877871	>tr|G1SYK4|G1SYK4_RABIT Uncharacterized protein OS=Oryctolagus cuniculus OX=9986 PE=4 SV=2
3	R.FTC[+57.021]SVAHTPSATHTN[+2569.905]K.T-NeuAc(2)Hex(6)HexNAc(5)	-5.8127	-6.45522	-0.591287	-6.13915	-5.73938	>tr|A0A5F9CFZ9|A0A5F9CFZ9_RABIT Uncharacterized protein OS=Oryctolagus cuniculus OX=9986 PE=4 SV=1
3	R.FTISKN[+1444.534]STTVTLKMTSLTASDTATYFC[+57.021]AR.D-Fuc(1)Hex(3)HexNAc(4)	-5.9816	-6.09542	-0.852159	-6.36771	-5.96408	>tr|G1U8I1|G1U8I1_RABIT Ig-like domain-containing protein OS=Oryctolagus cuniculus OX=9986 PE=4 SV=2
3	R.GEEKEN[+1913.677]LTAQALDLSLK.Y-NeuAc(1)Hex(5)HexNAc(4)	-0.167891	-0.209757	1.42792506390705	0.0526341022515458	-0.323803	>sp|Q9GLY5|ITIH3_RABIT Inter-alpha-trypsin inhibitor heavy chain H3 OS=Oryctolagus cuniculus OX=9986 GN=ITIH3 PE=2 SV=1
3	R.GGNSNGALC[+57.021]HFPFLYNNHN[+1710.598]YTDC[+57.021]TSEGR.R-NeuAc(1)Hex(5)HexNAc(3)	-5.86626	-6.01436	-0.837983	-6.18133	-6.27058	>tr|A0A5F9CJW0|A0A5F9CJW0_RABIT Fibronectin OS=Oryctolagus cuniculus OX=9986 GN=FN1 PE=4 SV=1
3	R.GGNSNGALC[+57.021]HFPFLYNNHN[+1711.618]YTDC[+57.021]TSEGR.R-Fuc(2)Hex(5)HexNAc(3)	-6.12175	-6.47805	-0.866483	-5.91745	-5.90801	>tr|A0A5F9CJW0|A0A5F9CJW0_RABIT Fibronectin OS=Oryctolagus cuniculus OX=9986 GN=FN1 PE=4 SV=1
3	R.GGNSNGALC[+57.021]HFPFLYNNHN[+1768.640]YTDC[+57.021]TSEGR.R-Fuc(1)Hex(5)HexNAc(4)	-5.80942	-5.41526	0.101465570935514	-6.06072	-5.64401	>tr|A0A5F9CJW0|A0A5F9CJW0_RABIT Fibronectin OS=Oryctolagus cuniculus OX=9986 GN=FN1 PE=4 SV=1
3	R.GGNSNGALC[+57.021]HFPFLYNNHN[+1897.682]YTDC[+57.021]TSEGR.R-NeuAc(1)Fuc(1)Hex(4)HexNAc(4)	-5.89763	-5.644	-0.852159	-5.83716	-6.13658	>tr|A0A5F9CJW0|A0A5F9CJW0_RABIT Fibronectin OS=Oryctolagus cuniculus OX=9986 GN=FN1 PE=4 SV=1
3	R.GGNSNGALC[+57.021]HFPFLYNNHN[+1913.677]YTDC[+57.021]TSEGRR.D-NeuAc(1)Hex(5)HexNAc(4)	-5.60515	-5.64775	-0.837983	-6.48801	-6.33264	>tr|A0A5F9CJW0|A0A5F9CJW0_RABIT Fibronectin OS=Oryctolagus cuniculus OX=9986 GN=FN1 PE=4 SV=1
3	R.GGNSNGALC[+57.021]HFPFLYNNHN[+2076.750]YTDC[+57.021]TSEGR.R-Fuc(2)Hex(6)HexNAc(4)	-5.52973	-5.82652	-0.866483	-6.71096	-6.01043	>tr|A0A5F9CJW0|A0A5F9CJW0_RABIT Fibronectin OS=Oryctolagus cuniculus OX=9986 GN=FN1 PE=4 SV=1
3	R.GIFFDKN[+2204.772]VSMSSEC[+57.021]STTPSPGIQVFPIAPSFADTFLSK.S-NeuAc(2)Hex(5)HexNAc(4)	-5.92685	-6.05041	-0.119249	-6.32582	-6.2577	>sp|P03988|IGHM_RABIT Ig mu chain C region secreted form OS=Oryctolagus cuniculus OX=9986 PE=2 SV=1
3	R.GIFFDKN[+2350.830]VSMSSEC[+57.021]STTPSPGIQVFPIAPSFADTFLSK.S-NeuAc(2)Fuc(1)Hex(5)HexNAc(4)	-5.65306	-6.18825	-0.837983	-5.70774	-5.99046	>sp|P03988|IGHM_RABIT Ig mu chain C region secreted form OS=Oryctolagus cuniculus OX=9986 PE=2 SV=1
3	R.GIFFDKN[+2569.905]VSMSSEC[+57.021]STTPSPGIQVFPIAPSFADTFLSK.S-NeuAc(2)Hex(6)HexNAc(5)	-6.10521	-5.4352	0.64610645482226	-5.95812	-5.43755	>sp|P03988|IGHM_RABIT Ig mu chain C region secreted form OS=Oryctolagus cuniculus OX=9986 PE=2 SV=1
3	R.GIISALLAPPETEEATQELFLDTVYGN[+1216.423]C[+57.021]STHVTVK.T-Hex(5)HexNAc(2)	-5.77958	-5.44334	0.0942975669652377	-5.80758	-6.54901	>tr|G1U9R4|G1U9R4_RABIT Apolipoprotein B OS=Oryctolagus cuniculus OX=9986 GN=APOB PE=4 SV=2
3	R.GKLTDFPDKGEFVVTVDQLTQN[+2116.756]DSGSYK.C-NeuAc(1)Hex(5)HexNAc(5)	-6.40374	-5.79111	-0.866483	-6.40452	-5.91403	>sp|P01832|PIGR_RABIT Polymeric immunoglobulin receptor OS=Oryctolagus cuniculus OX=9986 GN=PIGR PE=1 SV=1
3	R.GLN[+2278.809]LTDDAYAPR.I-NeuAc(1)Hex(6)HexNAc(5)	-5.66268	-6.28128	-0.866483	-6.36823	-6.06223	>tr|G1TFU9|G1TFU9_RABIT Galectin-3-binding protein OS=Oryctolagus cuniculus OX=9986 GN=LGALS3BP PE=4 SV=2
3	R.GLN[+2279.830]LTDDAYAPR.I-Fuc(2)Hex(6)HexNAc(5)	-6.24832	-6.38982	-0.866483	-6.05139	-5.93209	>tr|G1TFU9|G1TFU9_RABIT Galectin-3-binding protein OS=Oryctolagus cuniculus OX=9986 GN=LGALS3BP PE=4 SV=2
3	R.GLN[+2424.867]LTDDAYAPR.I-NeuAc(1)Fuc(1)Hex(6)HexNAc(5)	-6.53633	-6.19638	-0.361877	-6.11837	-6.12246	>tr|G1TFU9|G1TFU9_RABIT Galectin-3-binding protein OS=Oryctolagus cuniculus OX=9986 GN=LGALS3BP PE=4 SV=2
3	R.GLN[+3372.190]LTDDAYAPR.I-NeuAc(3)Fuc(1)Hex(7)HexNAc(6)	-6.24778	-6.55147	-0.852159	-5.82471	-5.68402	>tr|G1TFU9|G1TFU9_RABIT Galectin-3-binding protein OS=Oryctolagus cuniculus OX=9986 GN=LGALS3BP PE=4 SV=2
3	R.GSAN[+2644.962]R.T-Fuc(2)Hex(7)HexNAc(6)	-5.9016	-6.43904	-0.866483	-6.02233	-6.45491	>tr|G1SS69|G1SS69_RABIT C3/C5 convertase OS=Oryctolagus cuniculus OX=9986 PE=4 SV=2
3	R.HAQDAGVVC[+57.021]TN[+1913.677]ETR.S-NeuAc(1)Hex(5)HexNAc(4)	-0.629762	-0.646255	0.475003680698493	-0.79502	-0.700839	>tr|G1TFU9|G1TFU9_RABIT Galectin-3-binding protein OS=Oryctolagus cuniculus OX=9986 GN=LGALS3BP PE=4 SV=2
3	R.HAQDAGVVC[+57.021]TN[+2278.809]ETR.S-NeuAc(1)Hex(6)HexNAc(5)	-6.09037	-5.84948	-0.591287	-6.48285	-6.00208	>tr|G1TFU9|G1TFU9_RABIT Galectin-3-binding protein OS=Oryctolagus cuniculus OX=9986 GN=LGALS3BP PE=4 SV=2
3	R.HAQDAGVVC[+57.021]TN[+2715.963]ETR.S-NeuAc(2)Fuc(1)Hex(6)HexNAc(5)	-5.58275	-6.02011	-0.041696	-6.0274	-5.59644	>tr|G1TFU9|G1TFU9_RABIT Galectin-3-binding protein OS=Oryctolagus cuniculus OX=9986 GN=LGALS3BP PE=4 SV=2
3	R.HAQDAGVVC[+57.021]TN[+3007.058]ETR.S-NeuAc(3)Fuc(1)Hex(6)HexNAc(5)	-5.63063	-5.86798	0.72162972119715	-6.16539	-5.95344	>tr|G1TFU9|G1TFU9_RABIT Galectin-3-binding protein OS=Oryctolagus cuniculus OX=9986 GN=LGALS3BP PE=4 SV=2
3	R.HAQDAGVVC[+57.021]TN[+3663.286]ETR.S-NeuAc(4)Fuc(1)Hex(7)HexNAc(6)	-6.334	-6.45659	0.203194827794147	-6.37893	-6.26426	>tr|G1TFU9|G1TFU9_RABIT Galectin-3-binding protein OS=Oryctolagus cuniculus OX=9986 GN=LGALS3BP PE=4 SV=2
3	R.HDYILLPEDALSN[+1864.634]TTR.L-Hex(9)HexNAc(2)	-6.02686	-5.96711	-0.866483	-5.80031	-6.3284	>tr|A0A5F9DJW2|A0A5F9DJW2_RABIT EGF-like domain-containing protein OS=Oryctolagus cuniculus OX=9986 PE=4 SV=1
3	R.HEEGHMLN[+1622.582]C[+57.021]TC[+57.021]FGQGR.G-Hex(5)HexNAc(4)	-6.3179	-5.94329	-0.852159	-6.31437	-6.08759	>tr|A0A5F9CJW0|A0A5F9CJW0_RABIT Fibronectin OS=Oryctolagus cuniculus OX=9986 GN=FN1 PE=4 SV=1
3	R.HEEGHMLN[+2059.735]C[+57.021]TC[+57.021]FGQGR.G-NeuAc(1)Fuc(1)Hex(5)HexNAc(4)	-6.48129	-5.76569	-0.837983	-6.24101	-6.19803	>tr|A0A5F9CJW0|A0A5F9CJW0_RABIT Fibronectin OS=Oryctolagus cuniculus OX=9986 GN=FN1 PE=4 SV=1
3	R.HEEGHMLN[+2076.750]C[+57.021]TC[+57.021]FGQGR.G-Fuc(2)Hex(6)HexNAc(4)	-5.76259	-6.01395	-0.866483	-6.91801	-5.71478	>tr|A0A5F9CJW0|A0A5F9CJW0_RABIT Fibronectin OS=Oryctolagus cuniculus OX=9986 GN=FN1 PE=4 SV=1
3	R.HEEGHMLN[+2245.799]C[+57.021]TC[+57.021]FGQGR.G-NeuAc(2)Hex(4)HexNAc(5)	-5.97955	-5.97127	-0.837983	-6.22856	-5.90429	>tr|A0A5F9CJW0|A0A5F9CJW0_RABIT Fibronectin OS=Oryctolagus cuniculus OX=9986 GN=FN1 PE=4 SV=1
3	R.HEEGHMLN[+2350.830]C[+57.021]TC[+57.021]FGQGR.G-NeuAc(2)Fuc(1)Hex(5)HexNAc(4)	-6.36092	-6.40058	-0.579538	-5.19132	-5.87377	>tr|A0A5F9CJW0|A0A5F9CJW0_RABIT Fibronectin OS=Oryctolagus cuniculus OX=9986 GN=FN1 PE=4 SV=1
3	R.HEEGHMLN[+2861.000]C[+57.021]TC[+57.021]FGQGR.G-NeuAc(3)Hex(6)HexNAc(5)	-6.10214	-5.83536	-0.837983	-5.65118	-6.40695	>tr|A0A5F9CJW0|A0A5F9CJW0_RABIT Fibronectin OS=Oryctolagus cuniculus OX=9986 GN=FN1 PE=4 SV=1
3	R.HLHN[+2204.772]ASILQYGQR.N-NeuAc(2)Hex(5)HexNAc(4)	-5.93124	-5.93872	0.593173151808632	-6.19983	-5.21242	>tr|A0A4Z2DPV1|A0A4Z2DPV1_SCHJA Eukaryotic translation initiation factor 3 subunit A (Fragment) OS=Schistosoma japonicum OX=6182 GN=EWB00_010048 PE=3 SV=1
3	R.HN[+1095.397]K.T-Hex(3)HexNAc(3)	-6.2445	-5.72242	-0.866483	-6.10814	-6.17999	>tr|B7NZA0|B7NZA0_RABIT Serine proteinase inhibitor, clade B, member 10 (Predicted) OS=Oryctolagus cuniculus OX=9986 GN=SERPINB10 PE=3 SV=1
3	R.HN[+1403.507]K.T-Fuc(1)Hex(4)HexNAc(3)	-6.39185	-6.53944	-0.866483	-6.60404	-6.29956	>tr|B7NZA0|B7NZA0_RABIT Serine proteinase inhibitor, clade B, member 10 (Predicted) OS=Oryctolagus cuniculus OX=9986 GN=SERPINB10 PE=3 SV=1
3	R.HN[+2204.772]STGC[+57.021]LR.M-NeuAc(2)Hex(5)HexNAc(4)	-0.629762	-0.646255	0.475003680698493	-0.61153	-0.700839	>sp|Q9XSC5|CLUS_RABIT Clusterin OS=Oryctolagus cuniculus OX=9986 GN=CLU PE=2 SV=1
3	R.HN[+2569.905]STGC[+57.021]LR.M-NeuAc(2)Hex(6)HexNAc(5)	-5.68318	-6.14309	-0.361877	-5.68136	-6.21555	>sp|Q9XSC5|CLUS_RABIT Clusterin OS=Oryctolagus cuniculus OX=9986 GN=CLU PE=2 SV=1
3	R.HN[+2756.989]K.T-NeuAc(2)Fuc(1)Hex(5)HexNAc(6)	-6.02297	-6.07499	-0.866483	-5.83316	-6.11389	>tr|B7NZA0|B7NZA0_RABIT Serine proteinase inhibitor, clade B, member 10 (Predicted) OS=Oryctolagus cuniculus OX=9986 GN=SERPINB10 PE=3 SV=1
3	R.HRPFGTN[+1907.714]ETHR.F-Hex(3)HexNAc(7)	-5.82718	-5.80715	-0.837983	-5.66733	-6.18134	>tr|G1U754|G1U754_RABIT Histidine-rich glycoprotein OS=Oryctolagus cuniculus OX=9986 GN=HRG PE=4 SV=3
3	R.HRPFGTN[+2861.000]ETHR.F-NeuAc(3)Hex(6)HexNAc(5)	-0.2205	-0.745832	0.593173151808632	0.547050482722858	-0.672672	>tr|G1U754|G1U754_RABIT Histidine-rich glycoprotein OS=Oryctolagus cuniculus OX=9986 GN=HRG PE=4 SV=3
3	R.HYTN[+2407.852]LTSGIYR.F-NeuAc(2)Hex(5)HexNAc(5)	-5.54619	-5.44427	-0.837983	-5.90595	-5.52209	>tr|A0A5F9CXM9|A0A5F9CXM9_RABIT Peptidase M20 domain containing 1 OS=Oryctolagus cuniculus OX=9986 GN=PM20D1 PE=4 SV=1
3	R.HYYIAAEETIWDYAPSGVDTFTHEN[+2204.772]LTAPGSASEVFFEQGPTR.I-NeuAc(2)Hex(5)HexNAc(4)	3.20693250442724	3.72034839882004	4.88430623236499	2.89503687544725	3.76163327271557	>tr|G1SJX3|G1SJX3_RABIT Ceruloplasmin OS=Oryctolagus cuniculus OX=9986 GN=CP PE=3 SV=1
3	R.HYYIAAEETIWDYAPSGVDTFTHEN[+2206.813]LTAPGSASEVFFEQGPTR.I-Fuc(4)Hex(5)HexNAc(4)	0.145805118190613	0.800549953483723	2.0471638216054	-0.79502	0.226327667650856	>tr|G1SJX3|G1SJX3_RABIT Ceruloplasmin OS=Oryctolagus cuniculus OX=9986 GN=CP PE=3 SV=1
3	R.HYYIAAEETIWDYAPSGVDTFTHEN[+2245.799]LTAPGSASEVFFEQGPTR.I-NeuAc(2)Hex(4)HexNAc(5)	-6.129	-5.75799	-0.837983	-6.37	-5.64177	>tr|G1SJX3|G1SJX3_RABIT Ceruloplasmin OS=Oryctolagus cuniculus OX=9986 GN=CP PE=3 SV=1
3	R.HYYIAAEETIWDYAPSGVDTFTHEN[+3372.190]LTAPGSASEVFFEQGPTR.I-NeuAc(3)Fuc(1)Hex(7)HexNAc(6)	-5.96644	-5.72205	-0.837983	-6.63805	-5.49739	>tr|G1SJX3|G1SJX3_RABIT Ceruloplasmin OS=Oryctolagus cuniculus OX=9986 GN=CP PE=3 SV=1
3	R.HYYIAAEETIWDYAPSGVDTFTHEN[+892.317]LTAPGSASEVFFEQGPTRIGGSYK.K-Hex(3)HexNAc(2)	-6.31183	-5.86251	-0.361877	-6.16863	-6.34374	>tr|G1SJX3|G1SJX3_RABIT Ceruloplasmin OS=Oryctolagus cuniculus OX=9986 GN=CP PE=3 SV=1
3	R.IAEN[+1378.476]YTAVVSPDIASIDMNTFEFNK.P-Hex(6)HexNAc(2)	-5.76107	-6.19558	-0.866483	-5.6578	-6.12473	>tr|G1SMW5|G1SMW5_RABIT Polypeptide N-acetylgalactosaminyltransferase OS=Oryctolagus cuniculus OX=9986 GN=GALNT3 PE=3 SV=1
3	R.IAPSLAEFALSLYREVAHESN[+2206.813]TTNIFFSPVSISLAFAMLSLGAKGDTHTQVLEGLK.F-Fuc(4)Hex(5)HexNAc(4)	-6.08476	-6.32595	-0.837983	-6.53251	-5.86426	>tr|O62663|O62663_RABIT ATS-22 OS=Oryctolagus cuniculus OX=9986 PE=2 SV=1
3	R.IHYNNNNN[+1548.545]NSNNNR.S-NeuAc(1)Hex(4)HexNAc(3)	-6.14827	-5.68462	-0.361877	-6.2728	-5.58518	>tr|Q5DED3|Q5DED3_SCHJA SJCHGC00752 protein OS=Schistosoma japonicum OX=6182 PE=2 SV=1
3	R.IHYNNNNN[+1622.582]NSNNNR.S-Hex(5)HexNAc(4)	-5.79912	-6.05438	-0.837983	-5.84712	-6.42933	>tr|Q5DED3|Q5DED3_SCHJA SJCHGC00752 protein OS=Schistosoma japonicum OX=6182 PE=2 SV=1
3	R.IHYNNNNN[+1710.598]NSNNNR.S-NeuAc(1)Hex(5)HexNAc(3)	-6.10544	-5.85431	-0.361877	-5.78501	-5.61258	>tr|Q5DED3|Q5DED3_SCHJA SJCHGC00752 protein OS=Schistosoma japonicum OX=6182 PE=2 SV=1
3	R.IHYNNNNN[+1751.624]NSNNNR.S-NeuAc(1)Hex(4)HexNAc(4)	-6.03449	-6.43078	-0.837983	-6.05921	-6.37554	>tr|Q5DED3|Q5DED3_SCHJA SJCHGC00752 protein OS=Schistosoma japonicum OX=6182 PE=2 SV=1
3	R.IHYNNNNN[+1872.651]NSNNNR.S-NeuAc(1)Hex(6)HexNAc(3)	-5.9781	-6.31858	-0.102576	-5.59972	-6.58066	>tr|Q5DED3|Q5DED3_SCHJA SJCHGC00752 protein OS=Schistosoma japonicum OX=6182 PE=2 SV=1
3	R.IHYNNNNN[+1914.697]NSNNNR.S-Fuc(2)Hex(5)HexNAc(4)	-5.61223	-5.99265	0.115691052274908	-5.77665	-5.72369	>tr|Q5DED3|Q5DED3_SCHJA SJCHGC00752 protein OS=Schistosoma japonicum OX=6182 PE=2 SV=1
3	R.IHYNNNNN[+2059.735]NSNNNR.S-NeuAc(1)Fuc(1)Hex(5)HexNAc(4)	-5.61525	-5.97964	0.251383758535948	-6.18617	-6.1804	>tr|Q5DED3|Q5DED3_SCHJA SJCHGC00752 protein OS=Schistosoma japonicum OX=6182 PE=2 SV=1
3	R.IHYNNNNNNSNNN[+1548.545]R.S-NeuAc(1)Hex(4)HexNAc(3)	-5.60143	-5.8915	-0.837983	-5.57723	-5.78148	>tr|Q5DED3|Q5DED3_SCHJA SJCHGC00752 protein OS=Schistosoma japonicum OX=6182 PE=2 SV=1
3	R.IHYNNNNNNSNNN[+2204.772]R.S-NeuAc(2)Hex(5)HexNAc(4)	-6.31201	-6.12061	-0.591287	-5.7426	-5.69004	>tr|Q5DED3|Q5DED3_SCHJA SJCHGC00752 protein OS=Schistosoma japonicum OX=6182 PE=2 SV=1
3	R.IIVPLNTREN[+1768.640]ISDPTSPLR.T-Fuc(1)Hex(5)HexNAc(4)	-5.94212	-5.95926	-0.852159	-5.7567	-6.21215	>sp|P23108|IGJ_RABIT Immunoglobulin J chain OS=Oryctolagus cuniculus OX=9986 GN=JCHAIN PE=1 SV=1
3	R.ILYSIAYN[+1913.677]C[+57.021]TLRPVSR.R-NeuAc(1)Hex(5)HexNAc(4)	0.515909362963373	-0.646255	0.72162972119715	-0.242912	-0.299272	>tr|G1SEK8|G1SEK8_RABIT Fetuin B OS=Oryctolagus cuniculus OX=9986 GN=FETUB PE=4 SV=2
3	R.ILYSIAYN[+2206.813]C[+57.021]TLRPVSR.R-Fuc(4)Hex(5)HexNAc(4)	-5.72362	-6.40394	-0.361877	-6.33608	-5.8616	>tr|G1SEK8|G1SEK8_RABIT Fetuin B OS=Oryctolagus cuniculus OX=9986 GN=FETUB PE=4 SV=2
3	R.ITTTPTNGQQGYSLEEVVHADQNSC[+57.021]IFEN[+1913.677]LSPGLEYNVSVYTVK.D-NeuAc(1)Hex(5)HexNAc(4)	-5.98879	-6.17832	-0.361877	-6.23757	-6.36076	>tr|A0A5F9CJW0|A0A5F9CJW0_RABIT Fibronectin OS=Oryctolagus cuniculus OX=9986 GN=FN1 PE=4 SV=1
3	R.IVGGSN[+2204.772]SSR.G-NeuAc(2)Hex(5)HexNAc(4)	-5.34575	-5.97742	-0.866483	-5.87662	-6.06114	>tr|G1T127|G1T127_RABIT Kallikrein B1 OS=Oryctolagus cuniculus OX=9986 GN=KLKB1 PE=4 SV=2
3	R.IVSVDVNFHPVN[+2424.867]ETVSLITNPKK.N-NeuAc(1)Fuc(1)Hex(6)HexNAc(5)	-6.09898	-5.6179	-0.361877	-6.21041	-5.98643	>tr|A0A5F9C1C5|A0A5F9C1C5_RABIT Uncharacterized protein OS=Oryctolagus cuniculus OX=9986 PE=3 SV=1
3	R.LAGGSN[+2204.772]QTYFVFSR.L-NeuAc(2)Hex(5)HexNAc(4)	-6.08246	-6.06384	-0.837983	-5.93879	-5.66165	>tr|G1SK63|G1SK63_RABIT Uncharacterized protein OS=Oryctolagus cuniculus OX=9986 PE=4 SV=3
3	R.LAQAMMAFTTDLFSLVVQASTSPNLVLSPLSVALALSHLALGAQN[+2204.772]HTLQR.L-NeuAc(2)Hex(5)HexNAc(4)	-5.82508	-5.659	-0.837983	-5.25818	-6.17789	>tr|Q45GR2|Q45GR2_RABIT Alpha-2-plasmin inhibitor OS=Oryctolagus cuniculus OX=9986 PE=2 SV=1
3	R.LGMYVMFHC[+57.021]STLASTVLRMDYKGN[+4028.418]ATALFLLPDEGK.L-NeuAc(4)Fuc(1)Hex(8)HexNAc(7)	-6.26521	-6.80753	-0.866483	-6.41097	-5.94509	>tr|G1TGM8|G1TGM8_RABIT SERPIN domain-containing protein OS=Oryctolagus cuniculus OX=9986 GN=SERPINA1 PE=3 SV=1
3	R.LGMYVMFHC[+57.021]STLASTVVLMDYKGN[+2756.989]ATALFLLPDEGK.L-NeuAc(2)Fuc(1)Hex(5)HexNAc(6)	-6.17429	-5.83605	-0.837983	-5.97446	-6.44642	>tr|Q28666|Q28666_RABIT Alpha-1-antitrypsin OS=Oryctolagus cuniculus OX=9986 PE=2 SV=1
3	R.LLANHASQN[+1540.529]ITYHC[+57.021]K.N-Hex(7)HexNAc(2)	-5.97533	-6.6494	-0.866483	-6.27422	-6.43867	>sp|Q28668|CO1A2_RABIT Collagen alpha-2(I) chain (Fragment) OS=Oryctolagus cuniculus OX=9986 GN=COL1A2 PE=2 SV=1
3	R.LMSTEASQN[+1711.618]ITYHC[+57.021]K.N-Fuc(2)Hex(5)HexNAc(3)	-5.86519	-6.48079	-0.866483	-6.15494	-6.34538	>tr|Q6GVI2|Q6GVI2_RABIT Prepro-alpha-1 collagen type I (Fragment) OS=Oryctolagus cuniculus OX=9986 PE=2 SV=1
3	R.LN[+1913.677]YSSPMGQPAEVLLPR.D-NeuAc(1)Hex(5)HexNAc(4)	-6.11643	-5.72002	-0.837983	-5.73033	-6.34681	>tr|A0A5F9DC52|A0A5F9DC52_RABIT Tenascin C OS=Oryctolagus cuniculus OX=9986 GN=TNC PE=3 SV=1
3	R.LN[+1914.697]YSSPMGQPAEVLLPR.D-Fuc(2)Hex(5)HexNAc(4)	-5.67144	-5.45817	-0.837983	-6.30978	-5.82454	>tr|A0A5F9DC52|A0A5F9DC52_RABIT Tenascin C OS=Oryctolagus cuniculus OX=9986 GN=TNC PE=3 SV=1
3	R.LN[+2076.750]YSSPMGQPAEVLLPR.D-Fuc(2)Hex(6)HexNAc(4)	-5.59786	-6.01695	-0.361877	-5.69129	-6.4893	>tr|A0A5F9DC52|A0A5F9DC52_RABIT Tenascin C OS=Oryctolagus cuniculus OX=9986 GN=TNC PE=3 SV=1
3	R.LN[+2204.772]YSSPMGQPAEVLLPR.D-NeuAc(2)Hex(5)HexNAc(4)	-5.96568	-5.43423	0.768792266464217	-6.13975	-5.7221	>tr|A0A5F9DC52|A0A5F9DC52_RABIT Tenascin C OS=Oryctolagus cuniculus OX=9986 GN=TNC PE=3 SV=1
3	R.LPGNYHFQFDVELQHC[+57.021]N[+2206.813]VTVWLK.K-Fuc(4)Hex(5)HexNAc(4)	-5.81548	-6.09686	-0.866483	-6.35428	-6.14645	>tr|G1TZA1|G1TZA1_RABIT C1q domain-containing protein OS=Oryctolagus cuniculus OX=9986 PE=4 SV=2
3	R.LQVN[+1710.598]MTPGHSSAPPK.E-NeuAc(1)Hex(5)HexNAc(3)	-6.36304	-5.53689	-0.866483	-5.8639	-6.05975	>tr|A0A5F9CXM9|A0A5F9CXM9_RABIT Peptidase M20 domain containing 1 OS=Oryctolagus cuniculus OX=9986 GN=PM20D1 PE=4 SV=1
3	R.LQVN[+1913.677]MTPGHSSAPPK.E-NeuAc(1)Hex(5)HexNAc(4)	-5.93866	-6.54969	-0.361877	-5.78244	-6.27637	>tr|A0A5F9CXM9|A0A5F9CXM9_RABIT Peptidase M20 domain containing 1 OS=Oryctolagus cuniculus OX=9986 GN=PM20D1 PE=4 SV=1
3	R.LVGMQN[+2204.772]QTLK.Q-NeuAc(2)Hex(5)HexNAc(4)	-6.0042	-5.96011	-0.668729	-5.66295	-5.91579	>tr|G1TA71|G1TA71_RABIT Transcobalamin 1 OS=Oryctolagus cuniculus OX=9986 GN=TCN1 PE=3 SV=1
3	R.LYRKAN[+1897.682]K.S-NeuAc(1)Fuc(1)Hex(4)HexNAc(4)	-5.71462	-6.31002	-0.866483	-5.4953	-6.139	>tr|G1SIK0|G1SIK0_RABIT Antithrombin-III OS=Oryctolagus cuniculus OX=9986 GN=SERPINC1 PE=3 SV=1
3	R.N[+1216.423]GTLVAFR.G-Hex(5)HexNAc(2)	-6.23888	-5.98741	-0.668729	-5.84431	-5.57438	>tr|G1TFQ7|G1TFQ7_RABIT Uncharacterized protein OS=Oryctolagus cuniculus OX=9986 PE=4 SV=2
3	R.N[+1378.476]GTLVAFR.G-Hex(6)HexNAc(2)	-5.97248	-6.10981	-0.668729	-6.05269	-5.96392	>tr|G1TFQ7|G1TFQ7_RABIT Uncharacterized protein OS=Oryctolagus cuniculus OX=9986 PE=4 SV=2
3	R.N[+1548.545]STQHGHESTR.C-NeuAc(1)Hex(4)HexNAc(3)	-5.4221	-6.03155	-0.579538	-6.36132	-5.8351	>tr|G1TVS4|G1TVS4_RABIT Hemopexin OS=Oryctolagus cuniculus OX=9986 GN=TRIM3 PE=3 SV=2
3	R.N[+1864.634]ASR.S-Hex(9)HexNAc(2)	-6.89168	-6.42688	-0.837983	-5.97688	-5.62502	>tr|A0A5F9D681|A0A5F9D681_RABIT Nidogen 1 OS=Oryctolagus cuniculus OX=9986 PE=4 SV=1
3	R.N[+1872.651]GTLVAFR.G-NeuAc(1)Hex(6)HexNAc(3)	-5.66145	-6.01767	-0.668729	-6.08906	-6.32874	>tr|G1TFQ7|G1TFQ7_RABIT Uncharacterized protein OS=Oryctolagus cuniculus OX=9986 PE=4 SV=2
3	R.N[+1913.677]FTLLDPK.P-NeuAc(1)Hex(5)HexNAc(4)	-6.14478	-5.7771	-0.189594	-0.79502	-6.68277	>tr|G1STA7|G1STA7_RABIT Peptidoglycan recognition protein 2 OS=Oryctolagus cuniculus OX=9986 GN=PGLYRP2 PE=3 SV=2
3	R.N[+1914.697]ISEGFSGIPDNVDAAFALPAHSYSGR.E-Fuc(2)Hex(5)HexNAc(4)	-5.98763	-5.2864	-0.361877	-0.755305	-5.85178	>sp|P22458|VTNC_RABIT Vitronectin OS=Oryctolagus cuniculus OX=9986 GN=VTN PE=1 SV=1
3	R.N[+2059.735]LTVPGSLR.F-NeuAc(1)Fuc(1)Hex(5)HexNAc(4)	-6.42597	-6.31082	-0.837983	-6.00932	-5.53585	>tr|A0A5F9DC52|A0A5F9DC52_RABIT Tenascin C OS=Oryctolagus cuniculus OX=9986 GN=TNC PE=3 SV=1
3	R.N[+2204.772]STQHGHESTRC[+57.021]DPDLVLSAMVSDNHGATYVFSGSHYWRLDTNR.D-NeuAc(2)Hex(5)HexNAc(4)	-5.75953	-6.03223	-0.866483	-5.90202	-5.50876	>tr|G1TVS4|G1TVS4_RABIT Hemopexin OS=Oryctolagus cuniculus OX=9986 GN=TRIM3 PE=3 SV=2
3	R.N[+2262.814]ASR.S-NeuAc(1)Fuc(1)Hex(5)HexNAc(5)	-6.08082	-5.40804	-0.837983	-5.9619	-6.06741	>tr|A0A5F9D681|A0A5F9D681_RABIT Nidogen 1 OS=Oryctolagus cuniculus OX=9986 PE=4 SV=1
3	R.N[+2263.835]C[+57.021]SR.S-Fuc(3)Hex(5)HexNAc(5)	-6.57578	-5.97638	-0.837983	-6.44034	-6.06923	>tr|G1U754|G1U754_RABIT Histidine-rich glycoprotein OS=Oryctolagus cuniculus OX=9986 GN=HRG PE=4 SV=3
3	R.N[+2278.809]ISEGFSGIPDNVDAAFALPAHSYSGR.E-NeuAc(1)Hex(6)HexNAc(5)	-5.86944	-5.1857	-0.591287	-6.28337	-5.72549	>sp|P22458|VTNC_RABIT Vitronectin OS=Oryctolagus cuniculus OX=9986 GN=VTN PE=1 SV=1
3	R.N[+2278.809]VTIK.G-NeuAc(1)Hex(6)HexNAc(5)	-5.68495	-5.6651	-0.361877	-5.49106	-5.97746	>tr|G1SJH5|G1SJH5_RABIT LIF receptor subunit alpha OS=Oryctolagus cuniculus OX=9986 GN=LIFR PE=3 SV=2
3	R.N[+2350.830]LTVPGSLR.F-NeuAc(2)Fuc(1)Hex(5)HexNAc(4)	-6.64596	-6.30778	-0.852159	-5.57643	-6.64606	>tr|A0A5F9DC52|A0A5F9DC52_RABIT Tenascin C OS=Oryctolagus cuniculus OX=9986 GN=TNC PE=3 SV=1
3	R.N[+2350.830]STQHGHESTR.C-NeuAc(2)Fuc(1)Hex(5)HexNAc(4)	-5.8926	-5.49167	-0.866483	-6.07736	-6.18191	>tr|G1TVS4|G1TVS4_RABIT Hemopexin OS=Oryctolagus cuniculus OX=9986 GN=TRIM3 PE=3 SV=2
3	R.N[+2644.962]ASR.S-Fuc(2)Hex(7)HexNAc(6)	-6.51983	-5.59332	-0.837983	-5.99969	-6.06739	>tr|A0A5F9D681|A0A5F9D681_RABIT Nidogen 1 OS=Oryctolagus cuniculus OX=9986 PE=4 SV=1
3	R.N[+2756.989]LSC[+57.021]VVLR.L-NeuAc(2)Fuc(1)Hex(5)HexNAc(6)	-5.95447	-5.49991	-0.361877	-0.755305	-6.17882	>tr|G1SQG6|G1SQG6_RABIT SERPIN domain-containing protein OS=Oryctolagus cuniculus OX=9986 PE=3 SV=3
3	R.N[+2756.989]VTIKGVESSSYLVLVDK.L-NeuAc(2)Fuc(1)Hex(5)HexNAc(6)	-5.63809	-5.82183	-0.361877	-6.26272	-6.55928	>tr|G1SJH5|G1SJH5_RABIT LIF receptor subunit alpha OS=Oryctolagus cuniculus OX=9986 GN=LIFR PE=3 SV=2
3	R.N[+3372.190]LTVPGSLR.F-NeuAc(3)Fuc(1)Hex(7)HexNAc(6)	-5.79198	-6.38448	-0.866483	-6.25173	-6.16964	>tr|A0A5F9DC52|A0A5F9DC52_RABIT Tenascin C OS=Oryctolagus cuniculus OX=9986 GN=TNC PE=3 SV=1
3	R.N[+3372.190]NSPYEIENGVVWVPFR.G-NeuAc(3)Fuc(1)Hex(7)HexNAc(6)	-5.90236	-6.26843	-0.852159	-6.00533	-6.03496	>tr|G1T0X2|G1T0X2_RABIT Fibrinogen alpha chain OS=Oryctolagus cuniculus OX=9986 GN=FGA PE=4 SV=2
3	R.N[+3663.286]C[+57.021]SR.S-NeuAc(4)Fuc(1)Hex(7)HexNAc(6)	-6.68615	-5.76979	-0.837983	-5.70677	-6.44923	>tr|G1U754|G1U754_RABIT Histidine-rich glycoprotein OS=Oryctolagus cuniculus OX=9986 GN=HRG PE=4 SV=3
3	R.N[+3663.286]LSC[+57.021]VVLR.L-NeuAc(4)Fuc(1)Hex(7)HexNAc(6)	-5.84465	-5.78971	-0.361877	-6.02774	-6.01839	>tr|G1SQG6|G1SQG6_RABIT SERPIN domain-containing protein OS=Oryctolagus cuniculus OX=9986 PE=3 SV=3
3	R.N[+3663.286]NTVPYR.K-NeuAc(4)Fuc(1)Hex(7)HexNAc(6)	-6.40417	-5.83833	-0.837983	-6.21578	-6.06651	>tr|A0A4Z2DSH0|A0A4Z2DSH0_SCHJA [Histone H3]-trimethyl-L-lysine(4) demethylase OS=Schistosoma japonicum OX=6182 GN=EWB00_008880 PE=3 SV=1
3	R.N[+4028.418]TTISIYPSSNVK.E-NeuAc(4)Fuc(1)Hex(8)HexNAc(7)	-6.24245	-5.788	-0.866483	-5.37845	-6.3222	>tr|G1T1S9|G1T1S9_RABIT Uncharacterized protein OS=Oryctolagus cuniculus OX=9986 GN=VCAM1 PE=4 SV=2
3	R.N[+730.264]SSGK.L-Hex(2)HexNAc(2)	-6.02588	-6.03484	-0.866483	-5.81448	-5.95668	>tr|G1SIS0|G1SIS0_RABIT Patched 1 OS=Oryctolagus cuniculus OX=9986 GN=PTCH1 PE=3 SV=3
3	R.NALGHLPPTVFSALGN[+2756.989]LTFLNLQGNTLR.T-NeuAc(2)Fuc(1)Hex(5)HexNAc(6)	-5.95537	-5.90661	-0.866483	-6.17703	-6.02263	>tr|U3KPI5|U3KPI5_RABIT Carboxypeptidase N subunit 2 OS=Oryctolagus cuniculus OX=9986 GN=CPN2 PE=4 SV=1
3	R.NPPSGGNVVIFDTVITNQEEPYQN[+1694.603]HTGHFVC[+57.021]AVPGFYYFTFQVVSK.W-NeuAc(1)Fuc(1)Hex(4)HexNAc(3)	-6.33517	-5.59809	-0.866483	-6.29701	-5.57861	>tr|U3KMB5|U3KMB5_RABIT Complement C1q subcomponent subunit A OS=Oryctolagus cuniculus OX=9986 GN=C1QA PE=4 SV=2
3	R.NVSLIPETPEILN[+730.264]LSADFSTSTLSIK.W-Hex(2)HexNAc(2)	-5.93181	-5.50808	-0.361877	-5.66154	-6.12283	>tr|G1SJH5|G1SJH5_RABIT LIF receptor subunit alpha OS=Oryctolagus cuniculus OX=9986 GN=LIFR PE=3 SV=2
3	R.PEPEGPAPYMLGLVAGWGISNPN[+1444.534]VTVDEIISSGTR.T-Fuc(1)Hex(3)HexNAc(4)	-5.77557	-5.34666	-0.837983	-5.83257	-6.04613	>tr|A0A5F9D585|A0A5F9D585_RABIT Mannan binding lectin serine peptidase 1 OS=Oryctolagus cuniculus OX=9986 GN=MASP1 PE=4 SV=1
3	R.PFGTN[+917.349]ETHR.F-Fuc(1)Hex(1)HexNAc(3)	-6.21975	-6.803	-0.837983	-5.95136	-6.46036	>tr|G1U754|G1U754_RABIT Histidine-rich glycoprotein OS=Oryctolagus cuniculus OX=9986 GN=HRG PE=4 SV=3
3	R.PHTAVDSELPPN[+1955.724]VSVFIPPR.D-Fuc(2)Hex(4)HexNAc(5)	-6.06617	-5.93616	-0.837983	-6.11672	-6.21574	>tr|G1TK85|G1TK85_RABIT Immunoglobulin heavy constant mu OS=Oryctolagus cuniculus OX=9986 GN=IGHM PE=4 SV=2
3	R.PHTAVDSELPPN[+1971.719]VSVFIPPR.D-Fuc(1)Hex(5)HexNAc(5)	-6.33036	-5.44784	-0.361877	-6.54841	-5.52239	>tr|G1TK85|G1TK85_RABIT Immunoglobulin heavy constant mu OS=Oryctolagus cuniculus OX=9986 GN=IGHM PE=4 SV=2
3	R.PHTAVDSELPPN[+2262.814]VSVFIPPR.D-NeuAc(1)Fuc(1)Hex(5)HexNAc(5)	-0.557013	-0.435018	0.363158886566289	0.221622246184235	-0.660497	>tr|G1TK85|G1TK85_RABIT Immunoglobulin heavy constant mu OS=Oryctolagus cuniculus OX=9986 GN=IGHM PE=4 SV=2
3	R.PIC[+57.021]SGPELFHSSC[+57.021]DPREN[+1548.545]DTYTVQLLC[+57.021]LISGYTPGDIEVTWLVDGQK.D-NeuAc(1)Hex(4)HexNAc(3)	-6.4888	-5.95015	-0.866483	-5.67101	-5.92208	>tr|A0A5F9DLH0|A0A5F9DLH0_RABIT Uncharacterized protein OS=Oryctolagus cuniculus OX=9986 PE=4 SV=1
3	R.PSAPISVTEHPIVQKKTN[+1501.555]YSVSNQC[+57.021]PR.L-Hex(3)HexNAc(5)	-5.7856	-6.23017	-0.361877	-6.13366	-6.1714	>tr|A0A4Z2DLJ5|A0A4Z2DLJ5_SCHJA StAR-related lipid transfer protein OS=Schistosoma japonicum OX=6182 GN=EWB00_011211 PE=3 SV=1
3	R.PYLTEFIHN[+2245.799]TTVNYR.C-NeuAc(2)Hex(4)HexNAc(5)	-5.69579	-6.35668	0.115691052274908	-6.19309	-6.10801	>tr|G1SEL1|G1SEL1_RABIT Complement factor H related 5 OS=Oryctolagus cuniculus OX=9986 GN=CFHR5 PE=4 SV=2
3	R.QEGKLASTHSELN[+2278.809]ITQGEWASK.R-NeuAc(1)Hex(6)HexNAc(5)	-6.05388	-5.96368	-0.837983	-5.84714	-6.17153	>tr|G1SK63|G1SK63_RABIT Uncharacterized protein OS=Oryctolagus cuniculus OX=9986 PE=4 SV=3
3	R.QELN[+2715.963]DSLR.L-NeuAc(2)Fuc(1)Hex(6)HexNAc(5)	-6.25537	-5.81592	-0.361877	-6.04598	-6.0216	>sp|Q9XSC5|CLUS_RABIT Clusterin OS=Oryctolagus cuniculus OX=9986 GN=CLU PE=2 SV=1
3	R.QELN[+2861.000]DSLR.L-NeuAc(3)Hex(6)HexNAc(5)	-0.667458	-0.765241	0.638417597040303	-0.835796	-0.684957	>sp|Q9XSC5|CLUS_RABIT Clusterin OS=Oryctolagus cuniculus OX=9986 GN=CLU PE=2 SV=1
3	R.QGC[+57.021]APGSQKN[+1864.634]SSLC[+57.021]ELC[+57.021]IGPSVC[+57.021]APNNR.E-Hex(9)HexNAc(2)	-6.32474	-5.76002	-0.361877	-5.69093	-5.86022	>tr|G1STF7|G1STF7_RABIT Beta-1 metal-binding globulin OS=Oryctolagus cuniculus OX=9986 PE=3 SV=1
3	R.QGC[+57.021]APGSQKN[+1864.634]SSLC[+57.021]ELC[+57.021]VGPSVC[+57.021]APNNR.E-Hex(9)HexNAc(2)	-6.15191	-5.57599	-0.866483	-6.14531	-5.84407	>sp|P19134|TRFE_RABIT Serotransferrin OS=Oryctolagus cuniculus OX=9986 GN=TF PE=1 SV=4
3	R.QGC[+57.021]APGSQKN[+2245.799]SSLC[+57.021]ELC[+57.021]VGPSVC[+57.021]APNNR.E-NeuAc(2)Hex(4)HexNAc(5)	-6.03605	-6.01896	-0.837983	-5.52331	-5.74039	>sp|P19134|TRFE_RABIT Serotransferrin OS=Oryctolagus cuniculus OX=9986 GN=TF PE=1 SV=4
3	R.QGC[+57.021]APGSQKN[+2262.814]SSLC[+57.021]ELC[+57.021]VGPSVC[+57.021]APNNR.E-NeuAc(1)Fuc(1)Hex(5)HexNAc(5)	-6.4556	-5.71737	-0.591287	-0.755305	-6.00853	>sp|P19134|TRFE_RABIT Serotransferrin OS=Oryctolagus cuniculus OX=9986 GN=TF PE=1 SV=4
3	R.QGC[+57.021]APGSQKN[+2569.905]SSLC[+57.021]ELC[+57.021]IGPSVC[+57.021]APNNR.E-NeuAc(2)Hex(6)HexNAc(5)	-5.58132	-6.17833	-0.866483	-6.23065	-6.09326	>tr|G1STF7|G1STF7_RABIT Beta-1 metal-binding globulin OS=Oryctolagus cuniculus OX=9986 PE=3 SV=1
3	R.QTIQSVFPEVNTVTPGIC[+57.021]IGNTDSRHYTN[+2350.830]LTSGIYR.F-NeuAc(2)Fuc(1)Hex(5)HexNAc(4)	-6.50087	-5.56774	-0.361877	-5.96106	-6.03256	>tr|A0A5F9CXM9|A0A5F9CXM9_RABIT Peptidase M20 domain containing 1 OS=Oryctolagus cuniculus OX=9986 GN=PM20D1 PE=4 SV=1
3	R.SDHVN[+2060.755]R.T-Fuc(3)Hex(5)HexNAc(4)	-6.00822	-5.6037	-0.361877	-6.11968	-6.01288	>tr|G1SQ70|G1SQ70_RABIT Alpha-2-macroglobulin OS=Oryctolagus cuniculus OX=9986 GN=A2M PE=3 SV=3
3	R.SDHVN[+3663.286]R.T-NeuAc(4)Fuc(1)Hex(7)HexNAc(6)	-6.26312	-5.78455	-0.866483	-6.50954	-6.19811	>tr|G1SQ70|G1SQ70_RABIT Alpha-2-macroglobulin OS=Oryctolagus cuniculus OX=9986 GN=A2M PE=3 SV=3
3	R.SITC[+57.021]INGTWTQLPQC[+57.021]VATDQLEKC[+57.021]VVPDSIASETN[+1872.651]LSSKNEYNHNSNVSYR.C-NeuAc(1)Hex(6)HexNAc(3)	-5.92406	-5.95006	-0.361877	-6.08554	-5.87096	>tr|A0A5F9CG95|A0A5F9CG95_RABIT Uncharacterized protein OS=Oryctolagus cuniculus OX=9986 PE=4 SV=1
3	R.SLHLDN[+2204.772]FSNQIGK.H-NeuAc(2)Hex(5)HexNAc(4)	-6.38124	-6.4171	-0.837983	-6.00159	-5.90456	>tr|A0A5F9DND9|A0A5F9DND9_RABIT Coagulation factor V OS=Oryctolagus cuniculus OX=9986 GN=F5 PE=3 SV=1
3	R.SLSN[+2204.772]STAR.N-NeuAc(2)Hex(5)HexNAc(4)	-5.99847	-5.60912	-0.837983	-5.99046	-5.63665	>tr|A0A5F9C4W7|A0A5F9C4W7_RABIT SERPIN domain-containing protein OS=Oryctolagus cuniculus OX=9986 PE=3 SV=1
3	R.SQSSYNIDYNGNC[+57.021]NNNTNNN[+1987.714]NSNDYYNYYR.N-Hex(6)HexNAc(5)	-5.70688	-6.12611	-0.361877	-6.11668	-6.06847	>tr|Q5DED3|Q5DED3_SCHJA SJCHGC00752 protein OS=Schistosoma japonicum OX=6182 PE=2 SV=1
3	R.SQSSYNIDYNGNC[+57.021]NNNTNNN[+2076.750]NSNDYYNYYR.N-Fuc(2)Hex(6)HexNAc(4)	-6.07025	-5.73122	-0.361877	-5.77636	-5.74781	>tr|Q5DED3|Q5DED3_SCHJA SJCHGC00752 protein OS=Schistosoma japonicum OX=6182 PE=2 SV=1
3	R.SQSSYNIDYNGNC[+57.021]NNNTNNN[+2644.962]NSNDYYNYYR.N-Fuc(2)Hex(7)HexNAc(6)	-5.7454	-5.67279	-0.866483	-6.06405	-6.00543	>tr|Q5DED3|Q5DED3_SCHJA SJCHGC00752 protein OS=Schistosoma japonicum OX=6182 PE=2 SV=1
3	R.SQSSYNIDYNGNC[+57.021]NNNTNNN[+2861.000]NSNDYYNYYR.N-NeuAc(3)Hex(6)HexNAc(5)	-5.80381	-6.01561	-0.866483	-5.59471	-6.15756	>tr|Q5DED3|Q5DED3_SCHJA SJCHGC00752 protein OS=Schistosoma japonicum OX=6182 PE=2 SV=1
3	R.SQSSYNIDYNGNC[+57.021]NNNTNNN[+876.322]NSNDYYNYYR.N-Fuc(1)Hex(2)HexNAc(2)	-6.47717	-6.20102	-0.837983	-6.06614	-5.88656	>tr|Q5DED3|Q5DED3_SCHJA SJCHGC00752 protein OS=Schistosoma japonicum OX=6182 PE=2 SV=1
3	R.STLC[+57.021]RFLN[+2407.852]QSPLLQATMEVELEQHLR.S-NeuAc(2)Hex(5)HexNAc(5)	-6.08353	-6.11987	-0.361877	-6.18974	-6.33221	>tr|A0A4Z2CP65|A0A4Z2CP65_SCHJA Uncharacterized protein OS=Schistosoma japonicum OX=6182 GN=EWB00_008685 PE=4 SV=1
3	R.SWPAVGN[+1403.507]C[+57.021]TSALR.W-Fuc(1)Hex(4)HexNAc(3)	-5.91195	-5.86983	-0.837983	-6.36673	-6.19388	>tr|G1TVS4|G1TVS4_RABIT Hemopexin OS=Oryctolagus cuniculus OX=9986 GN=TRIM3 PE=3 SV=2
3	R.SWPAVGN[+1548.545]C[+57.021]TSALR.W-NeuAc(1)Hex(4)HexNAc(3)	-0.167891	-0.280872	1.08993980887759	0.221622246184235	-0.758977	>tr|G1TVS4|G1TVS4_RABIT Hemopexin OS=Oryctolagus cuniculus OX=9986 GN=TRIM3 PE=3 SV=2
3	R.SWPAVGN[+1710.598]C[+57.021]TSALR.W-NeuAc(1)Hex(5)HexNAc(3)	-6.17917	-6.05625	-0.668729	-6.31968	-5.80589	>tr|G1TVS4|G1TVS4_RABIT Hemopexin OS=Oryctolagus cuniculus OX=9986 GN=TRIM3 PE=3 SV=2
3	R.SWPAVGN[+1872.651]C[+57.021]TSALR.W-NeuAc(1)Hex(6)HexNAc(3)	-6.04716	-6.29811	-0.852159	-6.55128	-5.72442	>tr|G1TVS4|G1TVS4_RABIT Hemopexin OS=Oryctolagus cuniculus OX=9986 GN=TRIM3 PE=3 SV=2
3	R.SWPAVGN[+2059.735]C[+57.021]TSALR.W-NeuAc(1)Fuc(1)Hex(5)HexNAc(4)	-5.94474	-6.27672	-0.668729	-5.77044	-6.12511	>tr|G1TVS4|G1TVS4_RABIT Hemopexin OS=Oryctolagus cuniculus OX=9986 GN=TRIM3 PE=3 SV=2
3	R.SWPAVGN[+2352.846]C[+57.021]TSALR.W-Hex(7)HexNAc(6)	-6.15736	-6.00322	-0.866483	-5.76221	-5.46114	>tr|G1TVS4|G1TVS4_RABIT Hemopexin OS=Oryctolagus cuniculus OX=9986 GN=TRIM3 PE=3 SV=2
3	R.TARPPLREQQFN[+1298.476]STIRVVSTLPIAHQDWLR.G-Hex(3)HexNAc(4)	-6.47044	-5.94314	0.64610645482226	-0.755305	-6.12712	>tr|G1THZ6|G1THZ6_RABIT Immunoglobulin heavy constant mu OS=Oryctolagus cuniculus OX=9986 GN=IGHM PE=4 SV=3
3	R.TEVSTNHVLIYFEELTN[+714.269]K.T-Fuc(1)Hex(1)HexNAc(2)	-6.11221	-6.34768	-0.361877	-6.65525	-5.69882	>tr|A0A5F9C1C5|A0A5F9C1C5_RABIT Uncharacterized protein OS=Oryctolagus cuniculus OX=9986 PE=3 SV=1
3	R.TEVSTNHVLIYFEELTN[+917.349]KTLSFSFLVEQDIQIENLK.P-Fuc(1)Hex(1)HexNAc(3)	-6.58348	-5.55201	-0.866483	-6.09439	-5.77233	>tr|A0A5F9C1C5|A0A5F9C1C5_RABIT Uncharacterized protein OS=Oryctolagus cuniculus OX=9986 PE=3 SV=1
3	R.TEVSTNHVLIYLDKVSN[+2263.835]QTLSLSFTVVQDIPVIDLKPAIVKVYDYYETDEFAIAEYNAPC[+57.021]SK.D-Fuc(3)Hex(5)HexNAc(5)	-5.67716	-5.42009	-0.361877	-6.12581	-5.96565	>tr|G1SQ70|G1SQ70_RABIT Alpha-2-macroglobulin OS=Oryctolagus cuniculus OX=9986 GN=A2M PE=3 SV=3
3	R.TFQIHVN[+1622.582]ISYTGK.R-Hex(5)HexNAc(4)	-6.22725	-5.99511	-0.591287	-5.8307	-5.89505	>tr|A0A5F9C1C5|A0A5F9C1C5_RABIT Uncharacterized protein OS=Oryctolagus cuniculus OX=9986 PE=3 SV=1
3	R.TNC[+57.021]PNLN[+3663.286]NSIMLSFDPLMTITQNC[+57.021]DSPQLSESGDLFSK.P-NeuAc(4)Fuc(1)Hex(7)HexNAc(6)	-6.08386	-6.1602	-0.837983	-5.91156	-6.14804	>tr|A0A4Z2CMR3|A0A4Z2CMR3_SCHJA Transcription elongation regulator 1 OS=Schistosoma japonicum OX=6182 GN=EWB00_009166 PE=4 SV=1
3	R.TPEVTC[+57.021]VVVDVSQDDPEVQFTWYINNEQVRTARPPLREQQFN[+1702.581]STIR.V-Hex(8)HexNAc(2)	-5.39168	-5.84149	-0.866483	-5.73795	-5.80676	>tr|G1THZ6|G1THZ6_RABIT Immunoglobulin heavy constant mu OS=Oryctolagus cuniculus OX=9986 GN=IGHM PE=4 SV=3
3	R.TPEVTC[+57.021]VVVDVSQDDPEVQFTWYINNEQVRTARPPLREQQFN[+1768.640]STIR.V-Fuc(1)Hex(5)HexNAc(4)	-6.35872	-6.02211	-0.361877	-6.28941	-6.17247	>tr|G1THZ6|G1THZ6_RABIT Immunoglobulin heavy constant mu OS=Oryctolagus cuniculus OX=9986 GN=IGHM PE=4 SV=3
3	R.TPEVTC[+57.021]VVVDVSQDDPEVQFTWYINNEQVRTARPPLREQQFN[+3663.286]STIR.V-NeuAc(4)Fuc(1)Hex(7)HexNAc(6)	-5.6063	-5.96716	-0.837983	-6.34872	-5.99769	>tr|G1THZ6|G1THZ6_RABIT Immunoglobulin heavy constant mu OS=Oryctolagus cuniculus OX=9986 GN=IGHM PE=4 SV=3
3	R.TPIN[+1914.697]YSVYGETAQIR.R-Fuc(2)Hex(5)HexNAc(4)	-6.1572	-5.66995	-0.866483	-6.28964	-5.96121	>tr|G1TFQ7|G1TFQ7_RABIT Uncharacterized protein OS=Oryctolagus cuniculus OX=9986 PE=4 SV=2
3	R.TPIN[+2861.000]YSVYGETAQIR.R-NeuAc(3)Hex(6)HexNAc(5)	-5.89373	-6.04607	-0.361877	-6.23587	-5.68701	>tr|G1TFQ7|G1TFQ7_RABIT Uncharacterized protein OS=Oryctolagus cuniculus OX=9986 PE=4 SV=2
3	R.TYVEVVHQSVSAN[+892.317]STQK.V-Hex(3)HexNAc(2)	-6.03994	-6.25405	-0.361877	-5.95489	-5.98513	>tr|G1SIS0|G1SIS0_RABIT Patched 1 OS=Oryctolagus cuniculus OX=9986 GN=PTCH1 PE=3 SV=3
3	R.VDHRGIFFDKN[+1711.618]VSMSSEC[+57.021]STTPSPGIQVFPIAPSFADTFLSK.S-Fuc(2)Hex(5)HexNAc(3)	-5.99057	-6.21537	-0.361877	-6.11509	-6.10986	>sp|P03988|IGHM_RABIT Ig mu chain C region secreted form OS=Oryctolagus cuniculus OX=9986 PE=2 SV=1
3	R.VDLEDFEN[+2059.735]NTAFAK.Y-NeuAc(1)Fuc(1)Hex(5)HexNAc(4)	-0.629762	-0.435018	0.165555184242304	-0.61153	-0.70885	>tr|G1T8V2|G1T8V2_RABIT Microfibril associated protein 4 OS=Oryctolagus cuniculus OX=9986 GN=MFAP4 PE=4 SV=2
3	R.VDLEDFEN[+2717.978]NTAFAK.Y-Hex(8)HexNAc(7)	-5.94771	-6.38346	-0.837983	-5.50768	-6.16363	>tr|G1T8V2|G1T8V2_RABIT Microfibril associated protein 4 OS=Oryctolagus cuniculus OX=9986 GN=MFAP4 PE=4 SV=2
3	R.VDN[+1913.677]STSVSVPMLSGTGTFPHGSDAENNFSMTR.V-NeuAc(1)Hex(5)HexNAc(4)	-5.70212	-6.41689	0.37494182555044	-5.77713	-6.08162	>tr|G1SDD6|G1SDD6_RABIT Angiotensin 1-10 OS=Oryctolagus cuniculus OX=9986 GN=AGT PE=3 SV=3
3	R.VDN[+1954.704]R.S-NeuAc(1)Hex(4)HexNAc(5)	-5.75584	-6.45078	-0.837983	-5.75152	-5.8539	>tr|G1SD43|G1SD43_RABIT Glycosyl-phosphatidylinositol-specific phospholipase D OS=Oryctolagus cuniculus OX=9986 GN=GPLD1 PE=3 SV=3
3	R.VDN[+730.264]R.S-Hex(2)HexNAc(2)	-5.53416	-6.08734	-0.866483	-6.27851	-6.32552	>tr|G1SD43|G1SD43_RABIT Glycosyl-phosphatidylinositol-specific phospholipase D OS=Oryctolagus cuniculus OX=9986 GN=GPLD1 PE=3 SV=3
3	R.VEIFYRGQWGTVC[+57.021]DNLWDLMDASVVC[+57.021]RALGFQN[+2407.852]ATEALGR.A-NeuAc(2)Hex(5)HexNAc(5)	-6.26787	-6.18803	-0.361877	-6.23001	-6.15891	>tr|G1TFU9|G1TFU9_RABIT Galectin-3-binding protein OS=Oryctolagus cuniculus OX=9986 GN=LGALS3BP PE=4 SV=2
3	R.VFTLDHIFGSVNQYNSEN[+1872.651]NTQASIYNYVGK.P-NeuAc(1)Hex(6)HexNAc(3)	-5.57454	-6.23767	-0.361877	-6.28236	-5.85775	>tr|A0A4Z2DLJ5|A0A4Z2DLJ5_SCHJA StAR-related lipid transfer protein OS=Schistosoma japonicum OX=6182 GN=EWB00_011211 PE=3 SV=1
3	R.VN[+1996.750]STGKC[+57.021]GPPPPIENGDITSLSLPVYTSGSSVEYQC[+57.021]QSLYR.L-Fuc(2)Hex(3)HexNAc(6)	-5.64645	-5.27575	-0.866483	-5.76712	-6.04699	>tr|A0A5F9CSQ9|A0A5F9CSQ9_RABIT Uncharacterized protein OS=Oryctolagus cuniculus OX=9986 PE=4 SV=1
3	R.VNQNLAYHSDFFN[+1914.697]FSK.F-Fuc(2)Hex(5)HexNAc(4)	-5.6926	-6.11204	-0.866483	-5.58372	-6.46846	>tr|G1U9R4|G1U9R4_RABIT Apolipoprotein B OS=Oryctolagus cuniculus OX=9986 GN=APOB PE=4 SV=2
3	R.VPMMSRLGMYVMFHC[+57.021]STLASTVVLMDYKGN[+2060.755]ATALFLLPDEGK.L-Fuc(3)Hex(5)HexNAc(4)	-5.14794	-6.43902	-0.866483	-6.41909	-6.23241	>tr|Q28666|Q28666_RABIT Alpha-1-antitrypsin OS=Oryctolagus cuniculus OX=9986 PE=2 SV=1
3	R.VSFPVDSELPPN[+1825.661]VSVFIPPR.D-Hex(5)HexNAc(5)	-6.1704	-5.92271	-0.837983	-6.22646	-5.42143	>sp|P03988|IGHM_RABIT Ig mu chain C region secreted form OS=Oryctolagus cuniculus OX=9986 PE=2 SV=1
3	R.VSFPVDSELPPN[+2204.772]VSVFIPPR.D-NeuAc(2)Hex(5)HexNAc(4)	-6.63268	-5.87652	-0.361877	-5.9351	-5.85857	>sp|P03988|IGHM_RABIT Ig mu chain C region secreted form OS=Oryctolagus cuniculus OX=9986 PE=2 SV=1
3	R.VSLSVYLGEFFDIHLFVN[+1850.693]GTAMQGAQR.V-Fuc(1)Hex(3)HexNAc(6)	-6.06176	-5.8492	-0.866483	-6.20438	-6.51613	>tr|F5XVB8|F5XVB8_RABIT von Willebrand factor OS=Oryctolagus cuniculus OX=9986 GN=VWF PE=2 SV=1
3	R.VSN[+2059.735]VSC[+57.021]LASVSR.M-NeuAc(1)Fuc(1)Hex(5)HexNAc(4)	-6.13008	-5.42999	-0.361877	-5.88852	-6.13166	>tr|A0A5F9C720|A0A5F9C720_RABIT Phospholipid transfer protein OS=Oryctolagus cuniculus OX=9986 GN=PLTP PE=3 SV=1
3	R.VTSFMLEN[+2278.809]GTR.A-NeuAc(1)Hex(6)HexNAc(5)	-6.40615	-5.39043	-0.837983	-6.14113	-6.0168	>tr|G1SD43|G1SD43_RABIT Glycosyl-phosphatidylinositol-specific phospholipase D OS=Oryctolagus cuniculus OX=9986 GN=GPLD1 PE=3 SV=3
3	R.VTSMN[+1184.433]SSPVFILNK.R-Fuc(2)Hex(3)HexNAc(2)	-6.05898	-5.57728	-0.866483	-6.68863	-5.98314	>tr|A0A4Z2CYH9|A0A4Z2CYH9_SCHJA Double-stranded RNA-binding Staufen isoform X1 OS=Schistosoma japonicum OX=6182 GN=EWB00_006367 PE=4 SV=1
3	R.WELDLNIQEVLIHPN[+2569.905]YSR.S-NeuAc(2)Hex(6)HexNAc(5)	-6.16716	-6.43082	-0.361877	-6.4998	-5.85238	>sp|Q28661|PROC_RABIT Vitamin K-dependent protein C (Fragment) OS=Oryctolagus cuniculus OX=9986 GN=PROC PE=2 SV=1
3	R.WVLTAAHC[+57.021]LLYPPWDKN[+1872.651]FTVNDILVR.I-NeuAc(1)Hex(6)HexNAc(3)	-6.11635	-5.88745	-0.837983	-5.78557	-6.08974	>tr|Q28731|Q28731_RABIT Thrombin (Fragment) OS=Oryctolagus cuniculus OX=9986 GN=thrombin PE=2 SV=1
3	R.YFYN[+1914.697]GSSMAC[+57.021]ETFNYGGC[+57.021]LGNGNNFASEK.E-Fuc(2)Hex(5)HexNAc(4)	-5.64489	-5.76307	-0.837983	-6.50602	-6.00167	>tr|G1TSY8|G1TSY8_RABIT Alpha-1-microglobulin OS=Oryctolagus cuniculus OX=9986 GN=KIF12 PE=3 SV=2
3	R.YFYN[+2262.814]GSSMAC[+57.021]ETFNYGGC[+57.021]LGNGNNFASEK.E-NeuAc(1)Fuc(1)Hex(5)HexNAc(5)	-5.984	-6.06537	-0.837983	-6.25184	-5.94576	>tr|G1TSY8|G1TSY8_RABIT Alpha-1-microglobulin OS=Oryctolagus cuniculus OX=9986 GN=KIF12 PE=3 SV=2
3	R.YHLN[+1914.697]VTLHSTPEANK.K-Fuc(2)Hex(5)HexNAc(4)	-6.09623	-6.16335	-0.866483	-6.29175	-5.88441	>tr|G1SYK4|G1SYK4_RABIT Uncharacterized protein OS=Oryctolagus cuniculus OX=9986 PE=4 SV=2
3	R.YHLN[+1914.697]VTLHSTPEANKK.G-Fuc(2)Hex(5)HexNAc(4)	-6.26579	-6.08237	-0.837983	-5.57384	-5.96993	>tr|G1SYK4|G1SYK4_RABIT Uncharacterized protein OS=Oryctolagus cuniculus OX=9986 PE=4 SV=2
3	R.YHLN[+2076.750]VTLHSTPEANKK.G-Fuc(2)Hex(6)HexNAc(4)	-5.95462	-5.99171	-0.361877	-5.78542	-5.89959	>tr|G1SYK4|G1SYK4_RABIT Uncharacterized protein OS=Oryctolagus cuniculus OX=9986 PE=4 SV=2
3	R.YHLN[+2204.772]VTLHSTPEANKK.G-NeuAc(2)Hex(5)HexNAc(4)	0.932801544730855	1.04826717016981	1.67485801289392	1.20987924692189	0.803681810274727	>tr|G1SYK4|G1SYK4_RABIT Uncharacterized protein OS=Oryctolagus cuniculus OX=9986 PE=4 SV=2
3	R.YLN[+1548.545]YSR.T-NeuAc(1)Hex(4)HexNAc(3)	-6.02375	-6.65982	-0.866483	-6.28542	-5.84879	>tr|G1TN25|G1TN25_RABIT Alpha-2-glycoprotein 1, zinc-binding OS=Oryctolagus cuniculus OX=9986 GN=AZGP1 PE=3 SV=3
3	R.YLN[+1913.677]YSR.T-NeuAc(1)Hex(5)HexNAc(4)	-0.167891	0.0231948303368528	1.0989613295375	0.481386009463258	0.0057244580162851	>tr|G1TN25|G1TN25_RABIT Alpha-2-glycoprotein 1, zinc-binding OS=Oryctolagus cuniculus OX=9986 GN=AZGP1 PE=3 SV=3
3	R.YLN[+2278.809]YSR.T-NeuAc(1)Hex(6)HexNAc(5)	-6.75331	-5.87548	-0.866483	-5.60117	-5.93598	>tr|G1TN25|G1TN25_RABIT Alpha-2-glycoprotein 1, zinc-binding OS=Oryctolagus cuniculus OX=9986 GN=AZGP1 PE=3 SV=3
3	R.YLN[+2350.830]YSR.T-NeuAc(2)Fuc(1)Hex(5)HexNAc(4)	-5.77846	-5.80595	-0.579538	-6.30606	-6.08641	>tr|G1TN25|G1TN25_RABIT Alpha-2-glycoprotein 1, zinc-binding OS=Oryctolagus cuniculus OX=9986 GN=AZGP1 PE=3 SV=3
3	R.YTYILN[+1548.545]ASEEQSPGEGDGNC[+57.021]VTR.I-NeuAc(1)Hex(4)HexNAc(3)	-6.03371	-6.44352	-0.313519	-6.03635	-6.12564	>tr|G1SJX3|G1SJX3_RABIT Ceruloplasmin OS=Oryctolagus cuniculus OX=9986 GN=CP PE=3 SV=1
3	R.YTYILN[+1751.624]ASEEQSPGEGDGNC[+57.021]VTR.I-NeuAc(1)Hex(4)HexNAc(4)	-6.1062	-5.88364	-0.041696	-6.18397	-6.19719	>tr|G1SJX3|G1SJX3_RABIT Ceruloplasmin OS=Oryctolagus cuniculus OX=9986 GN=CP PE=3 SV=1
3	R.YTYILN[+1768.640]ASEEQSPGEGDGNC[+57.021]VTR.I-Fuc(1)Hex(5)HexNAc(4)	-6.25537	-6.15319	0.115691052274908	-6.00777	-6.26694	>tr|G1SJX3|G1SJX3_RABIT Ceruloplasmin OS=Oryctolagus cuniculus OX=9986 GN=CP PE=3 SV=1
3	R.YTYILN[+1913.677]ASEEQSPGEGDGNC[+57.021]VTR.I-NeuAc(1)Hex(5)HexNAc(4)	0.443085155640002	1.19914990564726	3.00868952354519	0.24216523277491	0.933569995762926	>tr|G1SJX3|G1SJX3_RABIT Ceruloplasmin OS=Oryctolagus cuniculus OX=9986 GN=CP PE=3 SV=1
3	R.YTYILN[+2060.755]ASEEQSPGEGDGNC[+57.021]VTR.I-Fuc(3)Hex(5)HexNAc(4)	-6.43835	-6.24084	-0.866483	-5.90281	-6.33739	>tr|G1SJX3|G1SJX3_RABIT Ceruloplasmin OS=Oryctolagus cuniculus OX=9986 GN=CP PE=3 SV=1
3	R.YTYILN[+2204.772]ASEEQSPGEGDGNC[+57.021]VTR.I-NeuAc(2)Hex(5)HexNAc(4)	3.79723496459804	3.85435930895452	4.85351498490955	3.82988792227572	3.77838065550069	>tr|G1SJX3|G1SJX3_RABIT Ceruloplasmin OS=Oryctolagus cuniculus OX=9986 GN=CP PE=3 SV=1
3	R.YTYILN[+2350.830]ASEEQSPGEGDGNC[+57.021]VTR.I-NeuAc(2)Fuc(1)Hex(5)HexNAc(4)	-0.563901	-0.765241	0.660496472425597	0.282440563819689	-0.305489	>tr|G1SJX3|G1SJX3_RABIT Ceruloplasmin OS=Oryctolagus cuniculus OX=9986 GN=CP PE=3 SV=1
3	R.YTYILN[+2569.905]ASEEQSPGEGDGNC[+57.021]VTR.I-NeuAc(2)Hex(6)HexNAc(5)	-6.03347	-6.50725	-0.852159	-6.00454	-6.17982	>tr|G1SJX3|G1SJX3_RABIT Ceruloplasmin OS=Oryctolagus cuniculus OX=9986 GN=CP PE=3 SV=1
4	K.AAVPSALSTN[+2263.835]SSR.G-Fuc(3)Hex(5)HexNAc(5)	-5.7785	-5.99078	-0.668729	-5.74038	-0.660497	>tr|G1TFU9|G1TFU9_RABIT Galectin-3-binding protein OS=Oryctolagus cuniculus OX=9986 GN=LGALS3BP PE=4 SV=2
4	K.AAVPSALSTN[+2569.905]SSR.G-NeuAc(2)Hex(6)HexNAc(5)	-5.54647	-0.745832	-0.28996	-6.30535	-0.125005	>tr|G1TFU9|G1TFU9_RABIT Galectin-3-binding protein OS=Oryctolagus cuniculus OX=9986 GN=LGALS3BP PE=4 SV=2
4	K.AFEN[+2350.830]VTDLQWLILDHNLLENSK.I-NeuAc(2)Fuc(1)Hex(5)HexNAc(4)	-6.00486	-6.72066	0.115691052274908	-6.23538	-0.660497	>tr|G1SP97|G1SP97_RABIT Lumican OS=Oryctolagus cuniculus OX=9986 GN=LUM PE=3 SV=1
4	K.AFPEVC[+57.021]N[+2204.772]ETMMALWEEC[+57.021]KPC[+57.021]LK.Q-NeuAc(2)Hex(5)HexNAc(4)	-0.2205	-0.646255	1.02419691140189	0.387288598895298	0.451600477509318	>sp|Q9XSC5|CLUS_RABIT Clusterin OS=Oryctolagus cuniculus OX=9986 GN=CLU PE=2 SV=1
4	K.AFPEVC[+57.021]N[+2861.000]ETMMALWEEC[+57.021]KPC[+57.021]LK.Q-NeuAc(3)Hex(6)HexNAc(5)	-6.14345	-6.1426	-0.361877	-6.07039	-0.323803	>sp|Q9XSC5|CLUS_RABIT Clusterin OS=Oryctolagus cuniculus OX=9986 GN=CLU PE=2 SV=1
4	K.AQYVEKEN[+1914.697]LTVR.C-Fuc(2)Hex(5)HexNAc(4)	-5.82182	-6.18787	-0.866483	-6.38051	-0.758977	>tr|A0A5F9CJA1|A0A5F9CJA1_RABIT Uncharacterized protein OS=Oryctolagus cuniculus OX=9986 PE=4 SV=1
4	K.AQYVEKEN[+2059.735]LTVR.C-NeuAc(1)Fuc(1)Hex(5)HexNAc(4)	-5.90011	-6.26839	-0.361877	-6.29603	-0.672672	>tr|A0A5F9CJA1|A0A5F9CJA1_RABIT Uncharacterized protein OS=Oryctolagus cuniculus OX=9986 PE=4 SV=1
4	K.ASPEQLEEFYEALTC[+57.021]LGMN[+2569.905]K.T-NeuAc(2)Hex(6)HexNAc(5)	-6.38298	-6.44887	1.76280255588035	-6.27671	-0.116839	>sp|P25227|A1AG_RABIT Alpha-1-acid glycoprotein OS=Oryctolagus cuniculus OX=9986 GN=ORM1 PE=2 SV=1
4	K.C[+57.021]IQHYEN[+1622.582]STVPENK.I-Hex(5)HexNAc(4)	-5.72695	-5.85983	-0.591287	-6.06653	-0.700839	>tr|G1SWF6|G1SWF6_RABIT Haptoglobin OS=Oryctolagus cuniculus OX=9986 PE=3 SV=1
4	K.C[+57.021]IQHYEN[+1914.697]STVPENK.I-Fuc(2)Hex(5)HexNAc(4)	-6.06221	-5.69873	0.593173151808632	-5.95612	-0.758977	>tr|G1SWF6|G1SWF6_RABIT Haptoglobin OS=Oryctolagus cuniculus OX=9986 PE=3 SV=1
4	K.C[+57.021]IQHYEN[+2350.830]STVPENK.I-NeuAc(2)Fuc(1)Hex(5)HexNAc(4)	-6.15179	-0.599015	1.0397241377168	-6.38088	-0.182197	>tr|G1SWF6|G1SWF6_RABIT Haptoglobin OS=Oryctolagus cuniculus OX=9986 PE=3 SV=1
4	K.C[+57.021]IQHYEN[+3007.058]STVPENK.I-NeuAc(3)Fuc(1)Hex(6)HexNAc(5)	-5.7862	-6.39309	0.919331989268303	-5.86739	-0.684957	>tr|G1SWF6|G1SWF6_RABIT Haptoglobin OS=Oryctolagus cuniculus OX=9986 PE=3 SV=1
4	K.C[+57.021]IQHYEN[+3517.228]STVPENK.I-NeuAc(4)Hex(7)HexNAc(6)	-6.02207	-6.63692	-0.319969	-5.89511	-0.672672	>tr|G1SWF6|G1SWF6_RABIT Haptoglobin OS=Oryctolagus cuniculus OX=9986 PE=3 SV=1
4	K.C[+57.021]VVPDSIASETN[+2204.772]LSSK.N-NeuAc(2)Hex(5)HexNAc(4)	0.720835297725583	0.686366286057981	0.955171348705291	0.805593317517772	1.0701359616687	>tr|A0A5F9CG95|A0A5F9CG95_RABIT Uncharacterized protein OS=Oryctolagus cuniculus OX=9986 PE=4 SV=1
4	K.EDALN[+2204.772]ETR.D-NeuAc(2)Hex(5)HexNAc(4)	-0.667458	-6.31245	-0.668729	-0.755305	-0.182197	>sp|Q9XSC5|CLUS_RABIT Clusterin OS=Oryctolagus cuniculus OX=9986 GN=CLU PE=2 SV=1
4	K.EKPIPN[+2569.905]K.T-NeuAc(2)Hex(6)HexNAc(5)	-0.778432	-6.19462	-0.591287	-0.416012	-0.700839	>tr|A0A5F9C1C5|A0A5F9C1C5_RABIT Uncharacterized protein OS=Oryctolagus cuniculus OX=9986 PE=3 SV=1
4	K.ELHHLQEQN[+2206.813]VSNPFLDKEEFYIGSK.Y-Fuc(4)Hex(5)HexNAc(4)	-0.557013	-5.46361	-0.361877	-6.48227	-0.660497	>tr|G1SJX3|G1SJX3_RABIT Ceruloplasmin OS=Oryctolagus cuniculus OX=9986 GN=CP PE=3 SV=1
4	K.ELHHLQEQN[+2861.000]VSNPFLDKEEFYIGSK.Y-NeuAc(3)Hex(6)HexNAc(5)	1.02383968860226	-0.0720599	1.74293316120129	0.06795760654184	1.41120725203144	>tr|G1SJX3|G1SJX3_RABIT Ceruloplasmin OS=Oryctolagus cuniculus OX=9986 GN=CP PE=3 SV=1
4	K.EN[+1622.582]LTVR.C-Hex(5)HexNAc(4)	-0.778432	-6.09398	-0.28996	-0.835796	-0.721466	>tr|A0A5F9CJA1|A0A5F9CJA1_RABIT Uncharacterized protein OS=Oryctolagus cuniculus OX=9986 PE=4 SV=1
4	K.FLN[+1622.582]NTFR.W-Hex(5)HexNAc(4)	-6.02945	-6.01396	0.593173151808632	-6.17075	-0.684957	>tr|A0A4Z2DI40|A0A4Z2DI40_SCHJA Chaperone protein isoform 2 OS=Schistosoma japonicum OX=6182 GN=EWB00_000687 PE=4 SV=1
4	K.FLN[+1913.677]NTFR.W-NeuAc(1)Hex(5)HexNAc(4)	-6.0016	-5.73935	-0.361877	-6.09822	0.811513366832318	>tr|A0A4Z2DI40|A0A4Z2DI40_SCHJA Chaperone protein isoform 2 OS=Schistosoma japonicum OX=6182 GN=EWB00_000687 PE=4 SV=1
4	K.FLN[+2204.772]NTFR.W-NeuAc(2)Hex(5)HexNAc(4)	-5.78781	-5.88649	-0.361877	-5.80474	0.258695988087587	>tr|A0A4Z2DI40|A0A4Z2DI40_SCHJA Chaperone protein isoform 2 OS=Schistosoma japonicum OX=6182 GN=EWB00_000687 PE=4 SV=1
4	K.FLN[+2569.905]NTFR.W-NeuAc(2)Hex(6)HexNAc(5)	-5.93296	-6.06271	-0.361877	-5.87777	-0.684957	>tr|A0A4Z2DI40|A0A4Z2DI40_SCHJA Chaperone protein isoform 2 OS=Schistosoma japonicum OX=6182 GN=EWB00_000687 PE=4 SV=1
4	K.FN[+2569.905]LTETAEAQIHDGFR.H-NeuAc(2)Hex(6)HexNAc(5)	-5.65613	1.76736850827409	1.82814602455029	-6.10984	1.8044327325324	>tr|G1TGM8|G1TGM8_RABIT SERPIN domain-containing protein OS=Oryctolagus cuniculus OX=9986 GN=SERPINA1 PE=3 SV=1
4	K.GC[+57.021]LLLSQLN[+1913.677]ETVTVTASLEALR.E-NeuAc(1)Hex(5)HexNAc(4)	1.74921646200011	3.17907059016165	4.0444407484283	1.81778000027989	3.18405462674219	>tr|G1SQ70|G1SQ70_RABIT Alpha-2-macroglobulin OS=Oryctolagus cuniculus OX=9986 GN=A2M PE=3 SV=3
4	K.GC[+57.021]LLLSQLN[+1914.697]ETVTVTASLEALR.E-Fuc(2)Hex(5)HexNAc(4)	-0.0761853	0.462707548636305	1.62899322380589	0.569051587244511	0.943395056186708	>tr|G1SQ70|G1SQ70_RABIT Alpha-2-macroglobulin OS=Oryctolagus cuniculus OX=9986 GN=A2M PE=3 SV=3
4	K.GHNAQNN[+2350.830]VSQNVFLGHTNVEEIMK.L-NeuAc(2)Fuc(1)Hex(5)HexNAc(4)	-5.88056	-6.19159	-0.313519	-5.8754	-0.758977	>tr|A0A5F9DGE4|A0A5F9DGE4_RABIT Complement C1r OS=Oryctolagus cuniculus OX=9986 GN=C1R PE=4 SV=1
4	K.GIPMPN[+1095.397]K.T-Hex(3)HexNAc(3)	-6.21037	-6.56082	-0.361877	-0.755305	-0.672672	>tr|G1SQ70|G1SQ70_RABIT Alpha-2-macroglobulin OS=Oryctolagus cuniculus OX=9986 GN=A2M PE=3 SV=3
4	K.GIPMPN[+2278.809]K.T-NeuAc(1)Hex(6)HexNAc(5)	0.406579450070963	-5.57337	0.841931229170787	0.855474385344744	-0.125005	>tr|G1SQ70|G1SQ70_RABIT Alpha-2-macroglobulin OS=Oryctolagus cuniculus OX=9986 GN=A2M PE=3 SV=3
4	K.GIPMPN[+2279.830]K.T-Fuc(2)Hex(6)HexNAc(5)	-6.11704	-5.94503	-0.837983	-0.755305	-0.684957	>tr|G1SQ70|G1SQ70_RABIT Alpha-2-macroglobulin OS=Oryctolagus cuniculus OX=9986 GN=A2M PE=3 SV=3
4	K.GIPMPN[+2350.830]K.T-NeuAc(2)Fuc(1)Hex(5)HexNAc(4)	-5.88709	-6.19588	0.482943525870077	-0.755305	-0.684957	>tr|G1SQ70|G1SQ70_RABIT Alpha-2-macroglobulin OS=Oryctolagus cuniculus OX=9986 GN=A2M PE=3 SV=3
4	K.GKWEKPFEPENTKEEDFHVN[+1914.697]ATTTVR.V-Fuc(2)Hex(5)HexNAc(4)	-0.557013	-6.17521	-0.866483	-6.36173	-0.660497	>tr|G1TFV7|G1TFV7_RABIT SERPIN domain-containing protein OS=Oryctolagus cuniculus OX=9986 GN=SERPINA1 PE=3 SV=2
4	K.GN[+1914.697]ATALFLLPDEGK.L-Fuc(2)Hex(5)HexNAc(4)	-0.557013	-0.646255	0.417602323609629	-0.835796	0.184494671254987	>tr|G1TGM8|G1TGM8_RABIT SERPIN domain-containing protein OS=Oryctolagus cuniculus OX=9986 GN=SERPINA1 PE=3 SV=1
4	K.IITFLEEEVN[+1913.677]VSVC[+57.021]GIYTYGK.A-NeuAc(1)Hex(5)HexNAc(4)	-5.7965	0.804847354043767	1.21059582638035	-6.4493	0.651131897204323	>tr|G1SQ70|G1SQ70_RABIT Alpha-2-macroglobulin OS=Oryctolagus cuniculus OX=9986 GN=A2M PE=3 SV=3
4	K.IITFLEEEVN[+1914.697]VSVC[+57.021]GIYTYGK.A-Fuc(2)Hex(5)HexNAc(4)	-5.82961	-0.745832	-0.361877	-5.9862	-0.758977	>tr|G1SQ70|G1SQ70_RABIT Alpha-2-macroglobulin OS=Oryctolagus cuniculus OX=9986 GN=A2M PE=3 SV=3
4	K.KEN[+1913.677]GTSHC[+57.021]IQNPNGK.P-NeuAc(1)Hex(5)HexNAc(4)	-6.1809	-0.745832	-0.28996	-6.0747	0.271009936095704	>tr|Q5C7J7|Q5C7J7_SCHJA SJCHGC07444 protein (Fragment) OS=Schistosoma japonicum OX=6182 PE=2 SV=2
4	K.KLHINHNN[+2350.830]LTESVGPLPK.S-NeuAc(2)Fuc(1)Hex(5)HexNAc(4)	0.879275747017967	1.22759132423451	1.38049200782209	-0.163202	1.29655555512246	>tr|G1SP97|G1SP97_RABIT Lumican OS=Oryctolagus cuniculus OX=9986 GN=LUM PE=3 SV=1
4	K.KN[+1913.677]HTAVLEK.H-NeuAc(1)Hex(5)HexNAc(4)	-6.429	-5.68215	-0.313519	-5.92911	-0.660497	>tr|G1TZA1|G1TZA1_RABIT C1q domain-containing protein OS=Oryctolagus cuniculus OX=9986 PE=4 SV=2
4	K.KN[+2204.772]HTAVLEK.H-NeuAc(2)Hex(5)HexNAc(4)	-0.629762	-0.209757	0.546424598772206	-0.576258	0.803681810274727	>tr|G1TZA1|G1TZA1_RABIT C1q domain-containing protein OS=Oryctolagus cuniculus OX=9986 PE=4 SV=2
4	K.KN[+2861.000]HTAVLEK.H-NeuAc(3)Hex(6)HexNAc(5)	-6.21311	-6.21349	-0.313519	-0.755305	-0.70885	>tr|G1TZA1|G1TZA1_RABIT C1q domain-containing protein OS=Oryctolagus cuniculus OX=9986 PE=4 SV=2
4	K.KPC[+57.021]N[+2350.830]ASDPQC[+57.021]PPDGR.Y-NeuAc(2)Fuc(1)Hex(5)HexNAc(4)	-5.5163	-6.05709	-0.119249	-0.755305	-0.721466	>tr|A0A5F9D1G8|A0A5F9D1G8_RABIT CN hydrolase domain-containing protein OS=Oryctolagus cuniculus OX=9986 PE=3 SV=1
4	K.LC[+57.021]PDC[+57.021]PLLTPLN[+1622.582]DTR.V-Hex(5)HexNAc(4)	-5.8221	-0.435018	-0.361877	-6.36505	-0.182197	>tr|U3KMR2|U3KMR2_RABIT Alpha-2-HS-glycoprotein OS=Oryctolagus cuniculus OX=9986 GN=AHSG PE=4 SV=1
4	K.LGAC[+57.021]N[+2204.772]DTLKQLMEVFKFDTISEK.T-NeuAc(2)Hex(5)HexNAc(4)	-5.93845	-0.646255	-0.361877	-6.16262	-0.00883865	>tr|G1SIK0|G1SIK0_RABIT Antithrombin-III OS=Oryctolagus cuniculus OX=9986 GN=SERPINC1 PE=3 SV=1
4	K.LHVLRC[+57.021]QGRN[+1501.555]YTLTGMDSC[+57.021]AVPAAVQK.A-Hex(3)HexNAc(5)	-5.91619	0.253957014626389	0.0476300521182762	-5.77752	-0.0286376	>tr|A0A5F9DPA2|A0A5F9DPA2_RABIT Caspase recruitment domain family member 6 OS=Oryctolagus cuniculus OX=9986 GN=CARD6 PE=3 SV=1
4	K.LN[+2204.772]GSFPGPLQPIVFQEALYNHR.G-NeuAc(2)Hex(5)HexNAc(4)	1.39479704871036	1.75026992313065	1.76566632520832	0.928483439546929	1.82250261405417	>tr|G1U575|G1U575_RABIT C1q domain-containing protein OS=Oryctolagus cuniculus OX=9986 PE=4 SV=2
4	K.LN[+2204.772]NSVIFK.I-NeuAc(2)Hex(5)HexNAc(4)	-6.15523	-5.86887	0.281310240454753	-6.58744	-0.721466	>tr|G1U9R4|G1U9R4_RABIT Apolipoprotein B OS=Oryctolagus cuniculus OX=9986 GN=APOB PE=4 SV=2
4	K.LN[+2861.000]GSFPGPLQPIVFQEALYNHR.G-NeuAc(3)Hex(6)HexNAc(5)	-0.0736674	0.639470017629813	1.70230516023217	0.154581324850378	1.07676574744214	>tr|G1U575|G1U575_RABIT C1q domain-containing protein OS=Oryctolagus cuniculus OX=9986 PE=4 SV=2
4	K.LTDFPDKGEFVVTVDQLTQN[+2204.772]DSGSYK.C-NeuAc(2)Hex(5)HexNAc(4)	-5.65217	-6.1274	2.14836528705147	-6.08804	-0.684957	>sp|P01832|PIGR_RABIT Polymeric immunoglobulin receptor OS=Oryctolagus cuniculus OX=9986 GN=PIGR PE=1 SV=1
4	K.N[+1548.545]NSEISSR.T-NeuAc(1)Hex(4)HexNAc(3)	-5.89346	-5.78426	-0.668729	-6.1389	-0.660497	>sp|P03988|IGHM_RABIT Ig mu chain C region secreted form OS=Oryctolagus cuniculus OX=9986 PE=2 SV=1
4	K.N[+1548.545]SSLC[+57.021]ELC[+57.021]VGPSVC[+57.021]APNNR.E-NeuAc(1)Hex(4)HexNAc(3)	-5.84596	-0.784926	-0.0364198	-5.58385	0.184494671254987	>sp|P19134|TRFE_RABIT Serotransferrin OS=Oryctolagus cuniculus OX=9986 GN=TF PE=1 SV=4
4	K.N[+1752.645]NSEISSR.T-Fuc(2)Hex(4)HexNAc(4)	-6.22305	-0.435018	-0.591287	-6.87385	0.283213876956592	>sp|P03988|IGHM_RABIT Ig mu chain C region secreted form OS=Oryctolagus cuniculus OX=9986 PE=2 SV=1
4	K.N[+1768.640]NSEISSR.T-Fuc(1)Hex(5)HexNAc(4)	-6.69951	-6.23763	0.593173151808632	-0.576258	0.0057244580162851	>sp|P03988|IGHM_RABIT Ig mu chain C region secreted form OS=Oryctolagus cuniculus OX=9986 PE=2 SV=1
4	K.N[+1872.651]ASSNR.F-NeuAc(1)Hex(6)HexNAc(3)	-5.67101	-0.745832	-0.837983	-6.18895	-0.684957	>tr|A0A4Z2CP65|A0A4Z2CP65_SCHJA Uncharacterized protein OS=Schistosoma japonicum OX=6182 GN=EWB00_008685 PE=4 SV=1
4	K.N[+1913.677]NSEISSR.T-NeuAc(1)Hex(5)HexNAc(4)	-0.778432	-5.93828	-0.852159	-5.42156	-0.660497	>sp|P03988|IGHM_RABIT Ig mu chain C region secreted form OS=Oryctolagus cuniculus OX=9986 PE=2 SV=1
4	K.N[+1914.697]NSEISSR.T-Fuc(2)Hex(5)HexNAc(4)	-5.39255	-6.08834	-0.361877	-6.19601	-0.700839	>sp|P03988|IGHM_RABIT Ig mu chain C region secreted form OS=Oryctolagus cuniculus OX=9986 PE=2 SV=1
4	K.N[+1955.724]NSEISSR.T-Fuc(2)Hex(4)HexNAc(5)	-6.34948	-5.57579	0.593173151808632	-6.13816	-0.672672	>sp|P03988|IGHM_RABIT Ig mu chain C region secreted form OS=Oryctolagus cuniculus OX=9986 PE=2 SV=1
4	K.N[+1971.719]NSEISSR.T-Fuc(1)Hex(5)HexNAc(5)	-5.52461	-5.81306	-0.361877	-0.416012	-0.684957	>sp|P03988|IGHM_RABIT Ig mu chain C region secreted form OS=Oryctolagus cuniculus OX=9986 PE=2 SV=1
4	K.N[+2117.777]NSEISSR.T-Fuc(2)Hex(5)HexNAc(5)	-5.54927	-5.39478	-0.361877	-5.76163	-0.660497	>sp|P03988|IGHM_RABIT Ig mu chain C region secreted form OS=Oryctolagus cuniculus OX=9986 PE=2 SV=1
4	K.N[+2133.772]NSEISSR.T-Fuc(1)Hex(6)HexNAc(5)	-5.83734	-6.50748	-0.579538	-5.92225	-0.660497	>sp|P03988|IGHM_RABIT Ig mu chain C region secreted form OS=Oryctolagus cuniculus OX=9986 PE=2 SV=1
4	K.N[+2206.813]SSLC[+57.021]ELC[+57.021]IGPSVC[+57.021]APNNR.E-Fuc(4)Hex(5)HexNAc(4)	0.776586327123733	0.92644982359459	0.902383473106958	-0.657968	1.58318574695169	>tr|G1STF7|G1STF7_RABIT Beta-1 metal-binding globulin OS=Oryctolagus cuniculus OX=9986 PE=3 SV=1
4	K.N[+2553.910]SSLC[+57.021]ELC[+57.021]IGPSVC[+57.021]APNNR.E-NeuAc(2)Fuc(1)Hex(5)HexNAc(5)	-6.253	-6.23868	-0.361877	-5.7951	-0.660497	>tr|G1STF7|G1STF7_RABIT Beta-1 metal-binding globulin OS=Oryctolagus cuniculus OX=9986 PE=3 SV=1
4	K.N[+2756.989]FTVNDILVR.I-NeuAc(2)Fuc(1)Hex(5)HexNAc(6)	-5.95707	-0.435018	-0.361877	-6.43687	0.258695988087587	>tr|Q28731|Q28731_RABIT Thrombin (Fragment) OS=Oryctolagus cuniculus OX=9986 GN=thrombin PE=2 SV=1
4	K.N[+2756.989]LSPR.A-NeuAc(2)Fuc(1)Hex(5)HexNAc(6)	-6.12859	-5.84448	-0.361877	-6.12144	-0.758977	>tr|G1SDD6|G1SDD6_RABIT Angiotensin 1-10 OS=Oryctolagus cuniculus OX=9986 GN=AGT PE=3 SV=3
4	K.N[+2756.989]QTR.E-NeuAc(2)Fuc(1)Hex(5)HexNAc(6)	-5.53318	-0.581775	-0.837983	-6.08894	0.258695988087587	>tr|U3KPG6|U3KPG6_RABIT Intercellular adhesion molecule 1 OS=Oryctolagus cuniculus OX=9986 GN=ICAM1 PE=3 SV=1
4	K.N[+2861.000]HTAVLEK.H-NeuAc(3)Hex(6)HexNAc(5)	-5.86166	-6.06685	0.108596606247865	-0.79502	-0.660497	>tr|G1TZA1|G1TZA1_RABIT C1q domain-containing protein OS=Oryctolagus cuniculus OX=9986 PE=4 SV=2
4	K.N[+3007.058]KSLR.T-NeuAc(3)Fuc(1)Hex(6)HexNAc(5)	-6.40324	-6.50922	-0.837983	-5.9308	-0.721466	>tr|A0A5F9C115|A0A5F9C115_RABIT Ring finger protein 8 OS=Oryctolagus cuniculus OX=9986 GN=RNF8 PE=4 SV=1
4	K.N[+3372.190]VTK.D-NeuAc(3)Fuc(1)Hex(7)HexNAc(6)	-6.09414	-5.86573	-0.361877	-6.1542	-0.684957	>tr|G1U128|G1U128_RABIT Mannan binding lectin serine peptidase 1 OS=Oryctolagus cuniculus OX=9986 GN=MASP1 PE=4 SV=3
4	K.N[+3663.286]VTK.D-NeuAc(4)Fuc(1)Hex(7)HexNAc(6)	-0.560453	-0.745832	-0.361877	-0.755305	-0.157489	>tr|G1U128|G1U128_RABIT Mannan binding lectin serine peptidase 1 OS=Oryctolagus cuniculus OX=9986 GN=MASP1 PE=4 SV=3
4	K.N[+4028.418]MSK.S-NeuAc(4)Fuc(1)Hex(8)HexNAc(7)	-6.13539	-6.38922	-0.866483	-6.3873	-0.660497	>tr|Q9TTJ4|Q9TTJ4_RABIT Inter-alpha-trypsin inhibitor heavy chain H1 OS=Oryctolagus cuniculus OX=9986 GN=ITI HC1 PE=2 SV=1
4	K.N[+892.317]ESAR.Q-Hex(3)HexNAc(2)	-5.61517	-6.0667	-0.361877	-6.53007	-0.660497	>sp|P35748|MYH11_RABIT Myosin-11 OS=Oryctolagus cuniculus OX=9986 GN=MYH11 PE=2 SV=2
4	K.NC[+57.021]DGADAHRTFQIHVN[+917.349]ISYTGK.R-Fuc(1)Hex(1)HexNAc(3)	-5.6899	-0.435018	-0.361877	-6.07472	0.811513366832318	>tr|A0A5F9C1C5|A0A5F9C1C5_RABIT Uncharacterized protein OS=Oryctolagus cuniculus OX=9986 PE=3 SV=1
4	K.NEYNHNSN[+1710.598]VSYR.C-NeuAc(1)Hex(5)HexNAc(3)	-0.667458	-6.02349	-0.668729	-0.657968	-0.721466	>tr|A0A5F9CG95|A0A5F9CG95_RABIT Uncharacterized protein OS=Oryctolagus cuniculus OX=9986 PE=4 SV=1
4	K.NEYNHNSN[+1913.677]VSYR.C-NeuAc(1)Hex(5)HexNAc(4)	-0.629762	-0.745832	-0.591287	-0.79502	-0.672672	>tr|A0A5F9CG95|A0A5F9CG95_RABIT Uncharacterized protein OS=Oryctolagus cuniculus OX=9986 PE=4 SV=1
4	K.NGN[+2206.813]MSGISDQGITMDLFK.H-Fuc(4)Hex(5)HexNAc(4)	-5.46854	-0.745832	-0.361877	-6.11609	-0.660497	>tr|G1SWF0|G1SWF0_RABIT Heparin cofactor 2 OS=Oryctolagus cuniculus OX=9986 GN=SERPIND1 PE=3 SV=1
4	K.NKEDALN[+2204.772]ETR.D-NeuAc(2)Hex(5)HexNAc(4)	-0.629762	-0.581775	0.194309911906466	-0.416012	-0.173683	>sp|Q9XSC5|CLUS_RABIT Clusterin OS=Oryctolagus cuniculus OX=9986 GN=CLU PE=2 SV=1
4	K.NKEDALN[+2569.905]ETR.D-NeuAc(2)Hex(6)HexNAc(5)	-6.00338	-5.84577	-0.313519	-5.84408	-0.660497	>sp|Q9XSC5|CLUS_RABIT Clusterin OS=Oryctolagus cuniculus OX=9986 GN=CLU PE=2 SV=1
4	K.PFEPENTKEEDFHVN[+1913.677]ATTTVR.V-NeuAc(1)Hex(5)HexNAc(4)	-0.560453	0.0884737366968349	0.0658091268458056	-0.755305	0.458742197523151	>tr|G1TFV7|G1TFV7_RABIT SERPIN domain-containing protein OS=Oryctolagus cuniculus OX=9986 GN=SERPINA1 PE=3 SV=2
4	K.PFEPENTKEEDFHVN[+2644.962]ATTTVR.V-Fuc(2)Hex(7)HexNAc(6)	-5.67385	-0.745832	-0.866483	-5.61341	-0.660497	>tr|A0A5F9DT67|A0A5F9DT67_RABIT SERPIN domain-containing protein OS=Oryctolagus cuniculus OX=9986 GN=SERPINA1 PE=3 SV=1
4	K.PTLYN[+2076.750]VSLIMSDTASTC[+57.021]Y.--Fuc(2)Hex(6)HexNAc(4)	-6.32607	-6.03462	-0.866483	-5.9235	-0.660497	>sp|P03988|IGHM_RABIT Ig mu chain C region secreted form OS=Oryctolagus cuniculus OX=9986 PE=2 SV=1
4	K.SAAC[+57.021]DVVYN[+2278.809]STK.R-NeuAc(1)Hex(6)HexNAc(5)	-6.29506	-6.15192	-0.579538	-5.96646	-0.684957	>tr|A0A5F9DB98|A0A5F9DB98_RABIT Uncharacterized protein OS=Oryctolagus cuniculus OX=9986 PE=4 SV=1
4	K.SEVQFN[+2204.772]LSSLQNNVQLSNDPR.E-NeuAc(2)Hex(5)HexNAc(4)	-0.560453	-6.29797	0.108596606247865	-0.064165	-0.305489	>tr|G1U9R4|G1U9R4_RABIT Apolipoprotein B OS=Oryctolagus cuniculus OX=9986 GN=APOB PE=4 SV=2
4	K.SLTFN[+1913.677]ETYQDISEVVYGAR.L-NeuAc(1)Hex(5)HexNAc(4)	0.407809343314832	0.374397119388078	0.847499976745527	-0.835796	0.792794510659216	>tr|G1SIK0|G1SIK0_RABIT Antithrombin-III OS=Oryctolagus cuniculus OX=9986 GN=SERPINC1 PE=3 SV=1
4	K.SLTFN[+2206.813]ETYQDISEVVYGAR.L-Fuc(4)Hex(5)HexNAc(4)	1.1439209120419	-6.05873	0.865130418734558	-0.576258	0.623765120828078	>tr|G1SIK0|G1SIK0_RABIT Antithrombin-III OS=Oryctolagus cuniculus OX=9986 GN=SERPINC1 PE=3 SV=1
4	K.STGKPTLYN[+1540.529]VSLIMSDTASTC[+57.021]Y.--Hex(7)HexNAc(2)	-5.58172	-0.0720599	0.285488893648089	-6.14264	0.283213876956592	>sp|P03988|IGHM_RABIT Ig mu chain C region secreted form OS=Oryctolagus cuniculus OX=9986 PE=2 SV=1
4	K.STGKPTLYN[+1702.581]VSLIMSDTASTC[+57.021]Y.--Hex(8)HexNAc(2)	-5.80184	-0.765241	1.50308539727744	-5.68871	1.16758582267951	>sp|P03988|IGHM_RABIT Ig mu chain C region secreted form OS=Oryctolagus cuniculus OX=9986 PE=2 SV=1
4	K.TAFITN[+2206.813]FTLTIDGVTYPGHVK.E-Fuc(4)Hex(5)HexNAc(4)	1.09494810435053	1.14708366370952	1.28528396336392	0.621364713666574	1.39199306588814	>sp|Q9GLY5|ITIH3_RABIT Inter-alpha-trypsin inhibitor heavy chain H3 OS=Oryctolagus cuniculus OX=9986 GN=ITIH3 PE=2 SV=1
4	K.TPQNSADC[+57.021]TYN[+1702.581]LSSTLTLTSTQYNSHK.E-Hex(8)HexNAc(2)	0.45804795202035	1.04826717016981	2.44394199332262	0.969976184634052	1.66094498603162	>tr|A0A1Y1BBR2|A0A1Y1BBR2_RABIT IgG light chain (Fragment) OS=Oryctolagus cuniculus OX=9986 PE=2 SV=1
4	K.TYEDDSPEWFQEDNAIQPN[+2204.772]C[+57.021]SYTYVWHATQR.S-NeuAc(2)Hex(5)HexNAc(4)	-6.11027	-6.12094	0.251383758535948	-6.63583	-0.672672	>tr|A0A5F9DND9|A0A5F9DND9_RABIT Coagulation factor V OS=Oryctolagus cuniculus OX=9986 GN=F5 PE=3 SV=1
4	K.VLPGERYTYILN[+1913.677]ASEEQSPGEGDGNC[+57.021]VTR.I-NeuAc(1)Hex(5)HexNAc(4)	-6.23852	-5.72698	-0.837983	-5.98121	-0.721466	>tr|G1SJX3|G1SJX3_RABIT Ceruloplasmin OS=Oryctolagus cuniculus OX=9986 GN=CP PE=3 SV=1
4	K.VTIC[+57.021]HSPQQN[+2204.772]STLSK.M-NeuAc(2)Hex(5)HexNAc(4)	-0.667458	-5.49869	0.198759506556206	-0.576258	-0.721466	>tr|A0A5F9D253|A0A5F9D253_RABIT Serpin family A member 7 OS=Oryctolagus cuniculus OX=9986 GN=SERPINA7 PE=3 SV=1
4	K.VVLHPN[+1751.624]YSEVDIGLIK.L-NeuAc(1)Hex(4)HexNAc(4)	-6.26123	-5.75262	-0.837983	-6.25715	-0.660497	>tr|G1SWF6|G1SWF6_RABIT Haptoglobin OS=Oryctolagus cuniculus OX=9986 PE=3 SV=1
4	K.VVLHPN[+2204.772]YSEVDIGLIK.L-NeuAc(2)Hex(5)HexNAc(4)	1.49798600269215	1.0158729006082	2.01465528280661	1.15507665176006	1.56625853245268	>sp|P19007|HPT_RABIT Haptoglobin OS=Oryctolagus cuniculus OX=9986 GN=HP PE=1 SV=2
4	K.VVLHPN[+2206.813]YSEVDIGLIK.L-Fuc(4)Hex(5)HexNAc(4)	-6.49879	-5.40711	-0.579538	-6.10853	-0.758977	>tr|G1SWF6|G1SWF6_RABIT Haptoglobin OS=Oryctolagus cuniculus OX=9986 PE=3 SV=1
4	K.VVLHPN[+2278.809]YSEVDIGLIK.L-NeuAc(1)Hex(6)HexNAc(5)	0.188906588243672	0.707449228773824	1.15046796056822	0.140106577123511	0.787431078921821	>sp|P19007|HPT_RABIT Haptoglobin OS=Oryctolagus cuniculus OX=9986 GN=HP PE=1 SV=2
4	K.VVLHPN[+2350.830]YSEVDIGLIK.L-NeuAc(2)Fuc(1)Hex(5)HexNAc(4)	-6.5737	-5.97865	-0.852159	-5.93888	-0.660497	>tr|G1SWF6|G1SWF6_RABIT Haptoglobin OS=Oryctolagus cuniculus OX=9986 PE=3 SV=1
4	K.VVLHPN[+2407.852]YSEVDIGLIK.L-NeuAc(2)Hex(5)HexNAc(5)	-6.37403	-0.745832	0.593173151808632	-6.65334	-0.0286376	>tr|G1SWF6|G1SWF6_RABIT Haptoglobin OS=Oryctolagus cuniculus OX=9986 PE=3 SV=1
4	K.VVLHPN[+2715.963]YSEVDIGLIK.L-NeuAc(2)Fuc(1)Hex(6)HexNAc(5)	-6.06491	-5.91426	0.902383473106958	-5.47666	-0.660497	>tr|G1SWF6|G1SWF6_RABIT Haptoglobin OS=Oryctolagus cuniculus OX=9986 PE=3 SV=1
4	K.VVLHPN[+3372.190]YSEVDIGLIK.L-NeuAc(3)Fuc(1)Hex(7)HexNAc(6)	-6.43529	-5.5874	-0.866483	-6.00212	0.737251484100417	>tr|G1SWF6|G1SWF6_RABIT Haptoglobin OS=Oryctolagus cuniculus OX=9986 PE=3 SV=1
4	K.VYSLSWGEVNLLSN[+714.269]C[+57.021]SKFYANR.F-Fuc(1)Hex(1)HexNAc(2)	-0.557013	-6.49016	-0.866483	-5.70894	-0.70885	>tr|A0A5F9CAP0|A0A5F9CAP0_RABIT Uncharacterized protein OS=Oryctolagus cuniculus OX=9986 PE=4 SV=1
4	K.WEKPFEPENTKEEDFHVN[+2245.799]ATTTVR.V-NeuAc(2)Hex(4)HexNAc(5)	-6.32919	-0.765241	0.115691052274908	-6.09755	-0.660497	>tr|A0A5F9DT67|A0A5F9DT67_RABIT SERPIN domain-containing protein OS=Oryctolagus cuniculus OX=9986 GN=SERPINA1 PE=3 SV=1
4	K.YTDHEN[+1914.697]GTGTNIYK.A-Fuc(2)Hex(5)HexNAc(4)	-6.27798	-5.82067	-0.361877	-6.31519	-0.70885	>tr|G1SS66|G1SS66_RABIT C3/C5 convertase OS=Oryctolagus cuniculus OX=9986 GN=C2 PE=4 SV=2
4	K.YTDHEN[+2204.772]GTGTNIYK.A-NeuAc(2)Hex(5)HexNAc(4)	-0.629762	-0.271699	0.289654956301696	-0.657968	-0.157489	>tr|G1SS66|G1SS66_RABIT C3/C5 convertase OS=Oryctolagus cuniculus OX=9986 GN=C2 PE=4 SV=2
4	R.ALGFQN[+2569.905]ATEALGR.A-NeuAc(2)Hex(6)HexNAc(5)	-6.55368	-0.280872	0.971488727471794	-5.73135	0.529009644089666	>tr|G1TFU9|G1TFU9_RABIT Galectin-3-binding protein OS=Oryctolagus cuniculus OX=9986 GN=LGALS3BP PE=4 SV=2
4	R.ALVTSQN[+2569.905]ETK.A-NeuAc(2)Hex(6)HexNAc(5)	-5.6214	-6.11095	-0.361877	-6.0693	-0.140816	>tr|G1TY29|G1TY29_RABIT Uncharacterized protein OS=Oryctolagus cuniculus OX=9986 GN=ITIH4 PE=4 SV=2
4	R.C[+57.021]N[+1913.677]YSIR.V-NeuAc(1)Hex(5)HexNAc(4)	-0.2205	-5.34344	-0.361877	-0.755305	-0.721466	>tr|G1T7H9|G1T7H9_RABIT Complement C1r OS=Oryctolagus cuniculus OX=9986 GN=C1R PE=4 SV=2
4	R.DFVN[+2569.905]ASSK.Y-NeuAc(2)Hex(6)HexNAc(5)	-6.23694	-5.58626	-0.866483	-6.20597	-0.660497	>tr|G1SWF0|G1SWF0_RABIT Heparin cofactor 2 OS=Oryctolagus cuniculus OX=9986 GN=SERPIND1 PE=3 SV=1
4	R.DQC[+57.021]IVDDITYNVN[+1872.651]DTFHK.R-NeuAc(1)Hex(6)HexNAc(3)	-6.16638	-5.50111	0.115691052274908	-6.04496	-0.758977	>tr|A0A5F9CJW0|A0A5F9CJW0_RABIT Fibronectin OS=Oryctolagus cuniculus OX=9986 GN=FN1 PE=4 SV=1
4	R.DQC[+57.021]IVDDITYNVN[+1913.677]DTFHK.R-NeuAc(1)Hex(5)HexNAc(4)	-0.166109	0.0202708759387374	0.765847589678946	-0.657968	0.451600477509318	>tr|A0A5F9CPW4|A0A5F9CPW4_RABIT Fibronectin OS=Oryctolagus cuniculus OX=9986 GN=FN1 PE=4 SV=1
4	R.DQC[+57.021]IVDDITYNVN[+2059.735]DTFHK.R-NeuAc(1)Fuc(1)Hex(5)HexNAc(4)	-5.62635	-0.581775	0.546424598772206	-5.87545	-0.660497	>tr|A0A5F9CPW4|A0A5F9CPW4_RABIT Fibronectin OS=Oryctolagus cuniculus OX=9986 GN=FN1 PE=4 SV=1
4	R.DQC[+57.021]IVDDITYNVN[+2204.772]DTFHK.R-NeuAc(2)Hex(5)HexNAc(4)	1.37514659321211	2.0166631279069	2.45508170348678	1.66080217868246	2.07421585287115	>tr|A0A5F9CPW4|A0A5F9CPW4_RABIT Fibronectin OS=Oryctolagus cuniculus OX=9986 GN=FN1 PE=4 SV=1
4	R.DTGN[+2350.830]HTVC[+57.021]QEDLC[+57.021]C[+57.021]HLTYK.M-NeuAc(2)Fuc(1)Hex(5)HexNAc(4)	-6.28861	-0.646255	0.363158886566289	-5.44878	-0.721466	>tr|A0A5F9D1G8|A0A5F9D1G8_RABIT CN hydrolase domain-containing protein OS=Oryctolagus cuniculus OX=9986 PE=3 SV=1
4	R.EIC[+57.021]EEQVNSLAASIN[+2059.735]K.S-NeuAc(1)Fuc(1)Hex(5)HexNAc(4)	-6.16927	-0.745832	-0.579538	-5.91668	-0.758977	>tr|G1STJ4|G1STJ4_RABIT Complement C3 alpha chain OS=Oryctolagus cuniculus OX=9986 PE=4 SV=3
4	R.EIC[+57.021]EEQVNSLAASIN[+2206.813]K.S-Fuc(4)Hex(5)HexNAc(4)	-6.04287	-0.435018	0.0870922090334206	-6.35886	-0.660497	>tr|G1STJ4|G1STJ4_RABIT Complement C3 alpha chain OS=Oryctolagus cuniculus OX=9986 PE=4 SV=3
4	R.ELN[+1913.677]YTR.Q-NeuAc(1)Hex(5)HexNAc(4)	-0.166109	-0.646255	0.0476300521182762	-0.242912	0.0057244580162851	>tr|G1SIS0|G1SIS0_RABIT Patched 1 OS=Oryctolagus cuniculus OX=9986 GN=PTCH1 PE=3 SV=3
4	R.EN[+1565.560]ISDPTSPLR.T-Fuc(1)Hex(5)HexNAc(3)	-6.38269	-0.581775	0.549875071931565	-5.91554	-0.684957	>sp|P23108|IGJ_RABIT Immunoglobulin J chain OS=Oryctolagus cuniculus OX=9986 GN=JCHAIN PE=1 SV=1
4	R.EN[+1606.587]ISDPTSPLR.T-Fuc(1)Hex(4)HexNAc(4)	-5.77113	-6.04382	0.285488893648089	-6.01225	-0.684957	>sp|P23108|IGJ_RABIT Immunoglobulin J chain OS=Oryctolagus cuniculus OX=9986 GN=JCHAIN PE=1 SV=1
4	R.EN[+1809.666]ISDPTSPLR.T-Fuc(1)Hex(4)HexNAc(5)	-6.15043	-6.47194	0.0476300521182762	-0.755305	-0.684957	>sp|P23108|IGJ_RABIT Immunoglobulin J chain OS=Oryctolagus cuniculus OX=9986 GN=JCHAIN PE=1 SV=1
4	R.EN[+1955.724]ISDPTSPLR.T-Fuc(2)Hex(4)HexNAc(5)	-5.7467	-0.581775	0.593173151808632	-6.24776	-0.0138631	>sp|P23108|IGJ_RABIT Immunoglobulin J chain OS=Oryctolagus cuniculus OX=9986 GN=JCHAIN PE=1 SV=1
4	R.EN[+2076.750]ISDPTSPLR.T-Fuc(2)Hex(6)HexNAc(4)	-5.34437	-0.745832	-0.866483	-6.52409	-0.660497	>sp|P23108|IGJ_RABIT Immunoglobulin J chain OS=Oryctolagus cuniculus OX=9986 GN=JCHAIN PE=1 SV=1
4	R.EN[+2262.814]ISDPTSPLR.T-NeuAc(1)Fuc(1)Hex(5)HexNAc(5)	-5.76862	-5.54349	-0.866483	-5.93787	-0.70885	>sp|P23108|IGJ_RABIT Immunoglobulin J chain OS=Oryctolagus cuniculus OX=9986 GN=JCHAIN PE=1 SV=1
4	R.EN[+2861.000]GTLSK.H-NeuAc(3)Hex(6)HexNAc(5)	-0.778432	-5.82211	1.89445537294842	-6.75922	-0.684957	>sp|P25227|A1AG_RABIT Alpha-1-acid glycoprotein OS=Oryctolagus cuniculus OX=9986 GN=ORM1 PE=2 SV=1
4	R.EN[+3517.228]GTLSK.H-NeuAc(4)Hex(7)HexNAc(6)	-6.09247	-0.435018	3.27656270045428	-6.36245	3.65031827172145	>sp|P25227|A1AG_RABIT Alpha-1-acid glycoprotein OS=Oryctolagus cuniculus OX=9986 GN=ORM1 PE=2 SV=1
4	R.EQQFN[+1095.397]STIR.V-Hex(3)HexNAc(3)	0.69242502889921	-0.646255	1.51751272368302	1.17736454904858	0.933569995762926	>tr|G1THZ6|G1THZ6_RABIT Immunoglobulin heavy constant mu OS=Oryctolagus cuniculus OX=9986 GN=IGHM PE=4 SV=3
4	R.EQQFN[+1216.423]STIR.V-Hex(5)HexNAc(2)	-0.629762	-6.63122	-0.668729	-0.657968	-0.758977	>tr|G1THZ6|G1THZ6_RABIT Immunoglobulin heavy constant mu OS=Oryctolagus cuniculus OX=9986 GN=IGHM PE=4 SV=3
4	R.EQQFN[+1702.581]STIR.V-Hex(8)HexNAc(2)	-0.778432	-5.7731	0.0870922090334206	-0.576258	-0.116839	>tr|G1THZ6|G1THZ6_RABIT Immunoglobulin heavy constant mu OS=Oryctolagus cuniculus OX=9986 GN=IGHM PE=4 SV=3
4	R.EQQFN[+1897.682]STIR.V-NeuAc(1)Fuc(1)Hex(4)HexNAc(4)	-0.667458	-5.92226	0.285488893648089	-0.755305	-0.721466	>tr|G1THZ6|G1THZ6_RABIT Immunoglobulin heavy constant mu OS=Oryctolagus cuniculus OX=9986 GN=IGHM PE=4 SV=3
4	R.EQQFN[+1987.714]STIR.V-Hex(6)HexNAc(5)	-0.667458	-6.00051	-0.591287	-0.0150889	0.258695988087587	>tr|G1THZ6|G1THZ6_RABIT Immunoglobulin heavy constant mu OS=Oryctolagus cuniculus OX=9986 GN=IGHM PE=4 SV=3
4	R.EQQFN[+2059.735]STIR.V-NeuAc(1)Fuc(1)Hex(5)HexNAc(4)	-5.42305	-6.35267	0.285488893648089	-0.755305	-0.684957	>tr|G1THZ6|G1THZ6_RABIT Immunoglobulin heavy constant mu OS=Oryctolagus cuniculus OX=9986 GN=IGHM PE=4 SV=3
4	R.ESN[+2206.813]TTNIFFSPVSIALAFAMLSLGAK.G-Fuc(4)Hex(5)HexNAc(4)	-5.58038	-0.435018	-0.361877	-6.09723	-0.660497	>tr|Q28666|Q28666_RABIT Alpha-1-antitrypsin OS=Oryctolagus cuniculus OX=9986 PE=2 SV=1
4	R.FHFPENLHIN[+1954.704]STEC[+57.021]LNVRC[+57.021]QGLETSLAEC[+57.021]TFTK.R-NeuAc(1)Hex(4)HexNAc(5)	-0.563901	-5.96713	-0.866483	-6.03838	-0.758977	>tr|A0A5F9CAP0|A0A5F9CAP0_RABIT Uncharacterized protein OS=Oryctolagus cuniculus OX=9986 PE=4 SV=1
4	R.FN[+1378.476]GSVSFFR.G-Hex(6)HexNAc(2)	-0.167891	0.0157761487075127	0.471360960255299	0.06795760654184	0.444711508381902	>tr|G1T8V2|G1T8V2_RABIT Microfibril associated protein 4 OS=Oryctolagus cuniculus OX=9986 GN=MFAP4 PE=4 SV=2
4	R.FN[+2569.905]ETHAIANWLLEK.R-NeuAc(2)Hex(6)HexNAc(5)	-5.79095	-6.13483	-0.866483	-6.20169	-0.660497	>tr|G1SYK4|G1SYK4_RABIT Uncharacterized protein OS=Oryctolagus cuniculus OX=9986 PE=4 SV=2
4	R.GGNSNGALC[+57.021]HFPFLYNNHN[+1914.697]YTDC[+57.021]TSEGR.R-Fuc(2)Hex(5)HexNAc(4)	-6.28793	-6.15175	0.232004144015429	0.302186910798418	-0.157489	>tr|A0A5F9CJW0|A0A5F9CJW0_RABIT Fibronectin OS=Oryctolagus cuniculus OX=9986 GN=FN1 PE=4 SV=1
4	R.GIFFDKN[+1913.677]VSMSSEC[+57.021]STTPSPGIQVFPIAPSFADTFLSK.S-NeuAc(1)Hex(5)HexNAc(4)	0.406579450070963	0.515828601177014	1.42975003431673	0.22284044203006	0.94089494564513	>sp|P03988|IGHM_RABIT Ig mu chain C region secreted form OS=Oryctolagus cuniculus OX=9986 PE=2 SV=1
4	R.GIFFDKN[+1954.704]VSMSSEC[+57.021]STTPSPGIQVFPIAPSFADTFLSK.S-NeuAc(1)Hex(4)HexNAc(5)	-6.16571	-0.765241	0.115691052274908	-5.77383	-0.70885	>sp|P03988|IGHM_RABIT Ig mu chain C region secreted form OS=Oryctolagus cuniculus OX=9986 PE=2 SV=1
4	R.GIFFDKN[+2117.777]VSMSSEC[+57.021]STTPSPGIQVFPIAPSFADTFLSK.S-Fuc(2)Hex(5)HexNAc(5)	-0.557013	-6.47019	-0.837983	-0.416012	-0.758977	>sp|P03988|IGHM_RABIT Ig mu chain C region secreted form OS=Oryctolagus cuniculus OX=9986 PE=2 SV=1
4	R.GLN[+2569.905]LTDDAYAPR.I-NeuAc(2)Hex(6)HexNAc(5)	-0.778432	-0.191466	0.974026834206521	-0.755305	0.472630245600012	>tr|G1TFU9|G1TFU9_RABIT Galectin-3-binding protein OS=Oryctolagus cuniculus OX=9986 GN=LGALS3BP PE=4 SV=2
4	R.GLN[+2715.963]LTDDAYAPR.I-NeuAc(2)Fuc(1)Hex(6)HexNAc(5)	-6.2562	-0.745832	0.203194827794147	-6.52008	-0.758977	>tr|G1TFU9|G1TFU9_RABIT Galectin-3-binding protein OS=Oryctolagus cuniculus OX=9986 GN=LGALS3BP PE=4 SV=2
4	R.GTNFN[+1913.677]ISK.V-NeuAc(1)Hex(5)HexNAc(4)	-0.667458	-0.646255	0.194309911906466	-0.0150889	0.455176004494049	>tr|G1T127|G1T127_RABIT Kallikrein B1 OS=Oryctolagus cuniculus OX=9986 GN=KLKB1 PE=4 SV=2
4	R.HN[+1913.677]STGC[+57.021]LR.M-NeuAc(1)Hex(5)HexNAc(4)	-6.1182	-6.20212	0.0476300521182762	-5.9701	-0.660497	>sp|Q9XSC5|CLUS_RABIT Clusterin OS=Oryctolagus cuniculus OX=9986 GN=CLU PE=2 SV=1
4	R.HYYIAAEETIWDYAPSGVDTFTHEN[+2569.905]LTAPGSASEVFFEQGPTR.I-NeuAc(2)Hex(6)HexNAc(5)	-5.75009	-0.581775	0.0942975669652377	-6.0926	-0.140816	>tr|A0A5F9CI66|A0A5F9CI66_RABIT Ceruloplasmin OS=Oryctolagus cuniculus OX=9986 GN=CP PE=3 SV=1
4	R.HYYIAAEETIWDYAPSGVDTFTHEN[+2861.000]LTAPGSASEVFFEQGPTR.I-NeuAc(3)Hex(6)HexNAc(5)	-6.02548	1.11565418728166	2.35593388635068	-5.66898	1.30217481444638	>tr|A0A5F9CI66|A0A5F9CI66_RABIT Ceruloplasmin OS=Oryctolagus cuniculus OX=9986 GN=CP PE=3 SV=1
4	R.IAPSLAEFALSLYREVAHESN[+2206.813]TTNIFFSPVSISLAFAMLSLGAK.G-Fuc(4)Hex(5)HexNAc(4)	-0.557013	-5.63526	0.411902391297678	-0.416012	-0.721466	>tr|O62663|O62663_RABIT ATS-22 OS=Oryctolagus cuniculus OX=9986 PE=2 SV=1
4	R.IHYNNNNN[+1913.677]NSNNNR.S-NeuAc(1)Hex(5)HexNAc(4)	-5.67337	-5.43222	0.921967573703022	-6.01579	-0.758977	>tr|Q5DED3|Q5DED3_SCHJA SJCHGC00752 protein OS=Schistosoma japonicum OX=6182 PE=2 SV=1
4	R.IHYNNNNN[+2204.772]NSNNNR.S-NeuAc(2)Hex(5)HexNAc(4)	-5.70628	-6.77172	0.867871267308723	-5.82279	-0.758977	>tr|Q5DED3|Q5DED3_SCHJA SJCHGC00752 protein OS=Schistosoma japonicum OX=6182 PE=2 SV=1
4	R.IHYNNNNN[+2350.830]NSNNNR.S-NeuAc(2)Fuc(1)Hex(5)HexNAc(4)	-5.90116	-5.63391	0.203194827794147	-6.13761	-0.758977	>tr|Q5DED3|Q5DED3_SCHJA SJCHGC00752 protein OS=Schistosoma japonicum OX=6182 PE=2 SV=1
4	R.IHYNNNNN[+2569.905]NSNNNR.S-NeuAc(2)Hex(6)HexNAc(5)	-5.43611	-6.04011	0.70821772193734	-5.93657	-0.758977	>tr|Q5DED3|Q5DED3_SCHJA SJCHGC00752 protein OS=Schistosoma japonicum OX=6182 PE=2 SV=1
4	R.IHYNNNNN[+2861.000]NSNNNR.S-NeuAc(3)Hex(6)HexNAc(5)	-5.38713	-5.86361	0.575094697411076	-6.35308	0.184494671254987	>tr|Q5DED3|Q5DED3_SCHJA SJCHGC00752 protein OS=Schistosoma japonicum OX=6182 PE=2 SV=1
4	R.ILYSIAYN[+1914.697]C[+57.021]TLRPVSR.R-Fuc(2)Hex(5)HexNAc(4)	-6.16515	-5.51345	-0.837983	-6.2088	-0.660497	>tr|G1SEK8|G1SEK8_RABIT Fetuin B OS=Oryctolagus cuniculus OX=9986 GN=FETUB PE=4 SV=2
4	R.ILYSIAYN[+2204.772]C[+57.021]TLRPVSR.R-NeuAc(2)Hex(5)HexNAc(4)	1.62980344892918	2.27070300891264	3.35097708425601	1.16997132214357	2.34342867301257	>tr|G1SEK8|G1SEK8_RABIT Fetuin B OS=Oryctolagus cuniculus OX=9986 GN=FETUB PE=4 SV=2
4	R.LN[+2350.830]ASAEDNGR.R-NeuAc(2)Fuc(1)Hex(5)HexNAc(4)	-6.11768	-5.52648	-0.361877	-0.755305	-0.684957	>tr|U3KPG6|U3KPG6_RABIT Intercellular adhesion molecule 1 OS=Oryctolagus cuniculus OX=9986 GN=ICAM1 PE=3 SV=1
4	R.N[+1914.697]STLTELLEGLK.F-Fuc(2)Hex(5)HexNAc(4)	-5.68855	-0.765241	-0.866483	-6.3949	-0.758977	>tr|G1TM88|G1TM88_RABIT Serpin family A member 3 OS=Oryctolagus cuniculus OX=9986 GN=SERPINA3 PE=3 SV=2
4	R.N[+2204.772]STLTELLEGLK.F-NeuAc(2)Hex(5)HexNAc(4)	0.477576047360197	-0.280872	1.13614208896291	-0.835796	0.518822819150762	>tr|G1TM88|G1TM88_RABIT Serpin family A member 3 OS=Oryctolagus cuniculus OX=9986 GN=SERPINA3 PE=3 SV=2
4	R.N[+2350.830]YTLTGMDSC[+57.021]AVPAAVQK.A-NeuAc(2)Fuc(1)Hex(5)HexNAc(4)	-5.85964	-6.01316	0.0476300521182762	-0.835796	0.23474581120806	>tr|A0A5F9DPA2|A0A5F9DPA2_RABIT Caspase recruitment domain family member 6 OS=Oryctolagus cuniculus OX=9986 GN=CARD6 PE=3 SV=1
4	R.N[+2569.905]C[+57.021]SR.S-NeuAc(2)Hex(6)HexNAc(5)	-0.778432	-6.00001	-0.579538	-0.755305	-0.684957	>tr|G1U754|G1U754_RABIT Histidine-rich glycoprotein OS=Oryctolagus cuniculus OX=9986 GN=HRG PE=4 SV=3
4	R.N[+2569.905]STLTELLEGLK.F-NeuAc(2)Hex(6)HexNAc(5)	-6.57262	-5.81516	0.593173151808632	-5.20446	-0.684957	>tr|G1TM88|G1TM88_RABIT Serpin family A member 3 OS=Oryctolagus cuniculus OX=9986 GN=SERPINA3 PE=3 SV=2
4	R.N[+917.349]C[+57.021]SR.S-Fuc(1)Hex(1)HexNAc(3)	-5.52437	-6.14442	-0.837983	-5.63349	-0.660497	>tr|G1U754|G1U754_RABIT Histidine-rich glycoprotein OS=Oryctolagus cuniculus OX=9986 GN=HRG PE=4 SV=3
4	R.NMAN[+2206.813]ITFLNFDPPIEEFHQYYQPIVTTLVK.G-Fuc(4)Hex(5)HexNAc(4)	-6.5376	-5.92148	-0.866483	-6.38587	-0.758977	>tr|G1T0U8|G1T0U8_RABIT Prenylcysteine oxidase 1 OS=Oryctolagus cuniculus OX=9986 GN=PCYOX1 PE=3 SV=2
4	R.PHTAVDSELPPN[+2245.799]VSVFIPPR.D-NeuAc(2)Hex(4)HexNAc(5)	-6.15401	-0.765241	0.0658091268458056	-6.50106	-0.140816	>tr|G1TK85|G1TK85_RABIT Immunoglobulin heavy constant mu OS=Oryctolagus cuniculus OX=9986 GN=IGHM PE=4 SV=2
4	R.QELN[+1914.697]DSLR.L-Fuc(2)Hex(5)HexNAc(4)	-6.62778	-6.02612	0.720095332048528	-6.04421	-0.758977	>sp|Q9XSC5|CLUS_RABIT Clusterin OS=Oryctolagus cuniculus OX=9986 GN=CLU PE=2 SV=1
4	R.QELN[+2204.772]DSLR.L-NeuAc(2)Hex(5)HexNAc(4)	-0.2205	-0.191466	1.33798720659133	1.21988056743346	1.48597100160202	>sp|Q9XSC5|CLUS_RABIT Clusterin OS=Oryctolagus cuniculus OX=9986 GN=CLU PE=2 SV=1
4	R.QELN[+2569.905]DSLR.L-NeuAc(2)Hex(6)HexNAc(5)	-5.63332	-6.08922	-0.189594	-6.01061	0.258695988087587	>sp|Q9XSC5|CLUS_RABIT Clusterin OS=Oryctolagus cuniculus OX=9986 GN=CLU PE=2 SV=1
4	R.QQTSN[+2204.772]DTVSPR.A-NeuAc(2)Hex(5)HexNAc(4)	-0.629762	-0.765241	-0.119249	-0.576258	-0.305489	>tr|G1TET0|G1TET0_RABIT Carboxypeptidase B2 OS=Oryctolagus cuniculus OX=9986 GN=CPB2 PE=3 SV=2
4	R.SITC[+57.021]IN[+1913.677]GTWTQLPQC[+57.021]VATDQLEK.C-NeuAc(1)Hex(5)HexNAc(4)	0.510741085231221	0.247673372079287	1.0430699080353	0.22284044203006	0.642070417303167	>tr|A0A5F9CG95|A0A5F9CG95_RABIT Uncharacterized protein OS=Oryctolagus cuniculus OX=9986 PE=4 SV=1
4	R.SQDIWTHSC[+57.021]PSSPGN[+2861.000]GTDTSH.--NeuAc(3)Hex(6)HexNAc(5)	-5.93585	-0.1967	-0.041696	-5.36842	0.184494671254987	>sp|P15196|SHBG_RABIT Sex hormone-binding globulin OS=Oryctolagus cuniculus OX=9986 GN=SHBG PE=1 SV=2
4	R.TDIN[+2861.000]SSR.N-NeuAc(3)Hex(6)HexNAc(5)	-0.563901	-5.23583	-0.361877	-5.95654	-0.672672	>tr|A0A5F9DLB4|A0A5F9DLB4_RABIT Coagulation factor V OS=Oryctolagus cuniculus OX=9986 GN=F5 PE=3 SV=1
4	R.TEVSTNHVLIYFEELTN[+1809.666]KTLSFSFLVEQDIQIENLKPATVK.A-Fuc(1)Hex(4)HexNAc(5)	0.443085155640002	0.773970086334044	2.05109959252917	0.921125906410285	1.49086402650364	>tr|A0A5F9C1C5|A0A5F9C1C5_RABIT Uncharacterized protein OS=Oryctolagus cuniculus OX=9986 PE=3 SV=1
4	R.VDLEDFEN[+2350.830]NTAFAK.Y-NeuAc(2)Fuc(1)Hex(5)HexNAc(4)	-0.557013	-0.765241	0.101465570935514	-0.835796	-0.157489	>tr|G1T8V2|G1T8V2_RABIT Microfibril associated protein 4 OS=Oryctolagus cuniculus OX=9986 GN=MFAP4 PE=4 SV=2
4	R.VDLEDFEN[+2715.963]NTAFAK.Y-NeuAc(2)Fuc(1)Hex(6)HexNAc(5)	-5.96595	-6.02076	-0.852159	-5.61585	-0.660497	>tr|G1T8V2|G1T8V2_RABIT Microfibril associated protein 4 OS=Oryctolagus cuniculus OX=9986 GN=MFAP4 PE=4 SV=2
4	R.VFSLN[+2204.772]K.S-NeuAc(2)Hex(5)HexNAc(4)	0.880182482961595	1.38307258561553	1.42975003431673	-0.261715	1.40245466351901	>tr|A0A5F9DI97|A0A5F9DI97_RABIT Uncharacterized protein OS=Oryctolagus cuniculus OX=9986 PE=3 SV=1
4	R.VPEITIPEFILPN[+2204.772]LSLK.D-NeuAc(2)Hex(5)HexNAc(4)	-5.81754	-0.435018	0.0550434595798335	-6.22754	-0.672672	>tr|G1U9R4|G1U9R4_RABIT Apolipoprotein B OS=Oryctolagus cuniculus OX=9986 GN=APOB PE=4 SV=2
4	R.YHLN[+2204.772]VTLHSTPEANK.K-NeuAc(2)Hex(5)HexNAc(4)	0.880182482961595	0.727278783294405	1.0726101308186	0.0526341022515458	1.08336351347327	>tr|G1SYK4|G1SYK4_RABIT Uncharacterized protein OS=Oryctolagus cuniculus OX=9986 PE=4 SV=2
4	R.YQGN[+2206.813]ATALFILPEEGK.M-Fuc(4)Hex(5)HexNAc(4)	-0.563901	-5.80976	-0.866483	-5.67542	-0.721466	>tr|G1SQG6|G1SQG6_RABIT SERPIN domain-containing protein OS=Oryctolagus cuniculus OX=9986 PE=3 SV=3
4	R.YTYILN[+1622.582]ASEEQSPGEGDGNC[+57.021]VTR.I-Hex(5)HexNAc(4)	-5.90879	-0.435018	0.853046385927852	-5.62473	-0.660497	>tr|A0A5F9CI66|A0A5F9CI66_RABIT Ceruloplasmin OS=Oryctolagus cuniculus OX=9986 GN=CP PE=3 SV=1
4	R.YTYILN[+2245.799]ASEEQSPGEGDGNC[+57.021]VTR.I-NeuAc(2)Hex(4)HexNAc(5)	-6.57221	-5.91711	-0.361877	-5.62403	-0.70885	>tr|G1SJX3|G1SJX3_RABIT Ceruloplasmin OS=Oryctolagus cuniculus OX=9986 GN=CP PE=3 SV=1
5	K.AAAQGLYN[+2350.830]NTYLTAVDEK.I-NeuAc(2)Fuc(1)Hex(5)HexNAc(4)	-5.94491	-5.52033	-5.95379	-6.40969	-0.684957	>tr|G1U2Q3|G1U2Q3_RABIT Apolipoprotein C-II OS=Oryctolagus cuniculus OX=9986 PE=3 SV=2
5	K.AEALC[+57.021]LSN[+2133.772]DTGLGLSPIASLR.A-Fuc(1)Hex(6)HexNAc(5)	0.406579450070963	0.515828601177014	0.371025325615321	-0.190043	0.950667652757157	>tr|G1TR31|G1TR31_RABIT Uncharacterized protein OS=Oryctolagus cuniculus OX=9986 PE=3 SV=3
5	K.AFITN[+2262.814]FSMTIDGVTYPGK.V-NeuAc(1)Fuc(1)Hex(5)HexNAc(5)	-5.82183	-5.71704	-6.07925	-6.09533	-0.758977	>tr|G1TY29|G1TY29_RABIT Uncharacterized protein OS=Oryctolagus cuniculus OX=9986 GN=ITIH4 PE=4 SV=2
5	K.AFPEVC[+57.021]N[+2569.905]ETMMALWEEC[+57.021]KPC[+57.021]LK.Q-NeuAc(2)Hex(6)HexNAc(5)	-6.44123	-5.89414	-6.13139	-6.06373	-0.660497	>sp|Q9XSC5|CLUS_RABIT Clusterin OS=Oryctolagus cuniculus OX=9986 GN=CLU PE=2 SV=1
5	K.AHLN[+1548.545]MSR.V-NeuAc(1)Hex(4)HexNAc(3)	-5.5924	-6.35507	-6.12696	-6.10289	-0.660497	>tr|G1TET0|G1TET0_RABIT Carboxypeptidase B2 OS=Oryctolagus cuniculus OX=9986 GN=CPB2 PE=3 SV=2
5	K.AHLN[+2204.772]MSR.V-NeuAc(2)Hex(5)HexNAc(4)	-0.629762	-0.765241	-0.668729	-0.242912	-0.0286376	>tr|G1TET0|G1TET0_RABIT Carboxypeptidase B2 OS=Oryctolagus cuniculus OX=9986 GN=CPB2 PE=3 SV=2
5	K.AHTSFQISIN[+1200.428]VSYIGSR.Q-Fuc(1)Hex(4)HexNAc(2)	-5.88057	-6.49287	-5.69345	-5.9046	-0.758977	>tr|G1TR31|G1TR31_RABIT Uncharacterized protein OS=Oryctolagus cuniculus OX=9986 PE=3 SV=3
5	K.AN[+1063.407]K.S-Fuc(2)Hex(1)HexNAc(3)	-5.9916	-6.5483	-6.07046	-6.03457	-0.70885	>tr|G1SIK0|G1SIK0_RABIT Antithrombin-III OS=Oryctolagus cuniculus OX=9986 GN=SERPINC1 PE=3 SV=1
5	K.AN[+1225.460]K.S-Fuc(2)Hex(2)HexNAc(3)	-5.94336	-6.21574	-5.83779	-6.59275	-0.660497	>tr|G1SIK0|G1SIK0_RABIT Antithrombin-III OS=Oryctolagus cuniculus OX=9986 GN=SERPINC1 PE=3 SV=1
5	K.AN[+1914.697]STDSASYHPLTGDTR.F-Fuc(2)Hex(5)HexNAc(4)	-6.21298	-5.6559	-6.77511	-5.64556	-0.660497	>tr|G1U9R4|G1U9R4_RABIT Apolipoprotein B OS=Oryctolagus cuniculus OX=9986 GN=APOB PE=4 SV=2
5	K.AN[+2204.772]STDSASYHPLTGDTR.F-NeuAc(2)Hex(5)HexNAc(4)	0.477576047360197	0.510623768081761	0.790347568783158	0.855474385344744	1.07449837803897	>tr|G1U9R4|G1U9R4_RABIT Apolipoprotein B OS=Oryctolagus cuniculus OX=9986 GN=APOB PE=4 SV=2
5	K.AN[+2204.772]VSSEALK.M-NeuAc(2)Hex(5)HexNAc(4)	1.2410106062342	1.38307258561553	1.02419691140189	1.50524626433419	1.73591450263319	>tr|Q9TTJ4|Q9TTJ4_RABIT Inter-alpha-trypsin inhibitor heavy chain H1 OS=Oryctolagus cuniculus OX=9986 GN=ITI HC1 PE=2 SV=1
5	K.AN[+2350.830]FTMK.G-NeuAc(2)Fuc(1)Hex(5)HexNAc(4)	-5.91257	-5.57223	-6.13284	-5.56041	-0.660497	>tr|A0A5F9CIL5|A0A5F9CIL5_RABIT Complement C3d receptor 2 OS=Oryctolagus cuniculus OX=9986 GN=CR2 PE=4 SV=1
5	K.ASAHTVELNDMFGQIQSPGYPDSYPSDSEVTWN[+2100.761]ITVPEGFR.I-NeuAc(1)Fuc(1)Hex(4)HexNAc(5)	-5.88899	-5.27698	-5.66525	-6.04021	-0.758977	>tr|G1U128|G1U128_RABIT Mannan binding lectin serine peptidase 1 OS=Oryctolagus cuniculus OX=9986 GN=MASP1 PE=4 SV=3
5	K.ATFN[+1751.624]ITLIHPRDYTALSNMLPR.S-NeuAc(1)Hex(4)HexNAc(4)	-6.36738	-5.79416	-5.87041	-6.45384	-0.758977	>tr|G1TE56|G1TE56_RABIT Aminopeptidase N OS=Oryctolagus cuniculus OX=9986 GN=ANPEP PE=3 SV=3
5	K.AVDAWSQEAGASHWAVAGLVDKIRFPMLLPEDLFELQFN[+2116.756]LSLYR.S-NeuAc(1)Hex(5)HexNAc(5)	-5.98737	-6.07103	-6.11088	-6.40238	-0.684957	>tr|G1TFU9|G1TFU9_RABIT Galectin-3-binding protein OS=Oryctolagus cuniculus OX=9986 GN=LGALS3BP PE=4 SV=2
5	K.C[+57.021]IQHYEN[+1752.645]STVPENK.I-Fuc(2)Hex(4)HexNAc(4)	-6.13849	-6.00242	-5.99308	-6.09615	-0.182197	>tr|G1SWF6|G1SWF6_RABIT Haptoglobin OS=Oryctolagus cuniculus OX=9986 PE=3 SV=1
5	K.C[+57.021]IQHYEN[+2245.799]STVPENK.I-NeuAc(2)Hex(4)HexNAc(5)	-6.08373	-6.57668	-5.66943	-5.6904	-0.684957	>tr|G1SWF6|G1SWF6_RABIT Haptoglobin OS=Oryctolagus cuniculus OX=9986 PE=3 SV=1
5	K.C[+57.021]PPTSAFSVKLN[+1825.661]GSFPGPLQPIVFQEALYNHR.G-Hex(5)HexNAc(5)	-6.17667	-6.09464	-5.85513	-6.3208	-0.684957	>tr|G1U575|G1U575_RABIT C1q domain-containing protein OS=Oryctolagus cuniculus OX=9986 PE=4 SV=2
5	K.DLKPEDFELLC[+57.021]LN[+2569.905]GTR.K-NeuAc(2)Hex(6)HexNAc(5)	-5.37385	-5.57244	-5.34783	-6.20764	-0.660497	>tr|G1TKE4|G1TKE4_RABIT Uncharacterized protein OS=Oryctolagus cuniculus OX=9986 PE=3 SV=1
5	K.DLNGLNN[+3517.228]NTQFNNLNELK.Q-NeuAc(4)Hex(7)HexNAc(6)	-6.49218	-6.25122	-6.22698	-5.94853	-0.684957	>tr|Q5C7J7|Q5C7J7_SCHJA SJCHGC07444 protein (Fragment) OS=Schistosoma japonicum OX=6182 PE=2 SV=2
5	K.DVDKEFYLFPTVFDEN[+1565.560]ESLFLDDNIK.M-Fuc(1)Hex(5)HexNAc(3)	-5.69999	-5.285	-6.00964	-6.36905	-0.660497	>tr|A0A5F9CI66|A0A5F9CI66_RABIT Ceruloplasmin OS=Oryctolagus cuniculus OX=9986 GN=CP PE=3 SV=1
5	K.EETFNSLLC[+57.021]PSGGELSYQLFLELPLNVVN[+1913.677]ESAR.A-NeuAc(1)Hex(5)HexNAc(4)	-6.42735	-6.10591	-6.33268	-6.08631	0.184494671254987	>tr|G1SQ70|G1SQ70_RABIT Alpha-2-macroglobulin OS=Oryctolagus cuniculus OX=9986 GN=A2M PE=3 SV=3
5	K.EETFNSLLC[+57.021]PSGGELSYQLFLELPLNVVN[+2206.813]ESAR.A-Fuc(4)Hex(5)HexNAc(4)	-5.93774	-6.01869	-5.98335	-5.89715	-0.684957	>tr|G1SQ70|G1SQ70_RABIT Alpha-2-macroglobulin OS=Oryctolagus cuniculus OX=9986 GN=A2M PE=3 SV=3
5	K.ELHHLQEQN[+2278.809]VSNPFLDKEEFYIGSKYK.K-NeuAc(1)Hex(6)HexNAc(5)	-5.75089	-5.73981	-5.37422	-6.21717	-0.758977	>tr|G1SJX3|G1SJX3_RABIT Ceruloplasmin OS=Oryctolagus cuniculus OX=9986 GN=CP PE=3 SV=1
5	K.ELHHLQEQN[+2861.000]VSNPFLDKEEFYIGSKYK.K-NeuAc(3)Hex(6)HexNAc(5)	-5.87718	-6.183	-5.9393	-5.74308	-0.660497	>tr|A0A5F9CI66|A0A5F9CI66_RABIT Ceruloplasmin OS=Oryctolagus cuniculus OX=9986 GN=CP PE=3 SV=1
5	K.EN[+1914.697]LTVR.C-Fuc(2)Hex(5)HexNAc(4)	-6.09927	-6.27664	-6.45893	-6.14921	-0.684957	>tr|A0A5F9CJA1|A0A5F9CJA1_RABIT Uncharacterized protein OS=Oryctolagus cuniculus OX=9986 PE=4 SV=1
5	K.EPKVTVAYAEN[+3007.058]GTVLQGSTVAAVYK.G-NeuAc(3)Fuc(1)Hex(6)HexNAc(5)	-5.8376	-6.62486	-5.71376	-6.32632	-0.684957	>sp|P27170|PON1_RABIT Serum paraoxonase/arylesterase 1 OS=Oryctolagus cuniculus OX=9986 GN=PON1 PE=1 SV=2
5	K.ESTGSHTFQGMFGC[+57.021]ELQNN[+2861.000]R.S-NeuAc(3)Hex(6)HexNAc(5)	-6.00402	-6.42515	-5.97545	-6.48741	-0.140816	>tr|G1TN25|G1TN25_RABIT Alpha-2-glycoprotein 1, zinc-binding OS=Oryctolagus cuniculus OX=9986 GN=AZGP1 PE=3 SV=3
5	K.EVNVSMYLVNGSVFSIANTN[+2717.978]LSYWDAPLGSSYMC[+57.021]NKEQTVSVSETFQINTFDLR.V-Hex(8)HexNAc(7)	-6.12007	-5.60881	-5.69261	-5.68008	-0.758977	>tr|A0A5F9CG60|A0A5F9CG60_RABIT Lysosomal associated membrane protein 2 OS=Oryctolagus cuniculus OX=9986 GN=LAMP2 PE=3 SV=1
5	K.FEVKVTMPKIITFLEEEVN[+1241.454]VSVC[+57.021]GIYTYGK.A-Fuc(1)Hex(3)HexNAc(3)	-6.10229	-6.12635	-6.1516	-5.76456	-0.660497	>tr|G1SQ70|G1SQ70_RABIT Alpha-2-macroglobulin OS=Oryctolagus cuniculus OX=9986 GN=A2M PE=3 SV=3
5	K.FHDVSESTHWTPFLN[+2206.813]ASIHYIHENYPFPWEK.D-Fuc(4)Hex(5)HexNAc(4)	-6.86668	-5.76758	-5.5	-0.416012	-0.299272	>tr|G1SD43|G1SD43_RABIT Glycosyl-phosphatidylinositol-specific phospholipase D OS=Oryctolagus cuniculus OX=9986 GN=GPLD1 PE=3 SV=3
5	K.FLN[+1548.545]NTFR.W-NeuAc(1)Hex(4)HexNAc(3)	-6.01792	-6.12892	-5.65649	-6.36682	-0.684957	>tr|A0A4Z2DI40|A0A4Z2DI40_SCHJA Chaperone protein isoform 2 OS=Schistosoma japonicum OX=6182 GN=EWB00_000687 PE=4 SV=1
5	K.FLN[+1710.598]NTFR.W-NeuAc(1)Hex(5)HexNAc(3)	-5.83175	-6.19758	-6.46858	-6.28756	-0.684957	>tr|A0A4Z2DI40|A0A4Z2DI40_SCHJA Chaperone protein isoform 2 OS=Schistosoma japonicum OX=6182 GN=EWB00_000687 PE=4 SV=1
5	K.FLN[+1751.624]NTFR.W-NeuAc(1)Hex(4)HexNAc(4)	-6.35594	-5.51922	-5.85863	-5.7505	-0.684957	>tr|A0A4Z2DI40|A0A4Z2DI40_SCHJA Chaperone protein isoform 2 OS=Schistosoma japonicum OX=6182 GN=EWB00_000687 PE=4 SV=1
5	K.FLN[+1872.651]NTFR.W-NeuAc(1)Hex(6)HexNAc(3)	-5.67097	-6.0191	-5.98927	-6.1301	0.258695988087587	>tr|A0A4Z2DI40|A0A4Z2DI40_SCHJA Chaperone protein isoform 2 OS=Schistosoma japonicum OX=6182 GN=EWB00_000687 PE=4 SV=1
5	K.FLN[+2352.846]NTFR.W-Hex(7)HexNAc(6)	-5.68977	-5.57529	-6.10556	-6.5027	-0.684957	>tr|A0A4Z2DI40|A0A4Z2DI40_SCHJA Chaperone protein isoform 2 OS=Schistosoma japonicum OX=6182 GN=EWB00_000687 PE=4 SV=1
5	K.FLN[+2861.000]NTFR.W-NeuAc(3)Hex(6)HexNAc(5)	-6.26361	-6.80341	-6.28313	-5.93257	-0.684957	>tr|A0A4Z2DI40|A0A4Z2DI40_SCHJA Chaperone protein isoform 2 OS=Schistosoma japonicum OX=6182 GN=EWB00_000687 PE=4 SV=1
5	K.FN[+3372.190]VSLK.Y-NeuAc(3)Fuc(1)Hex(7)HexNAc(6)	-5.88758	-6.02834	-5.72377	-5.79584	-0.684957	>tr|A0A5F9CAP0|A0A5F9CAP0_RABIT Uncharacterized protein OS=Oryctolagus cuniculus OX=9986 PE=4 SV=1
5	K.FN[+892.317]VSLK.Y-Hex(3)HexNAc(2)	-6.12758	-6.16619	-5.50657	-5.91667	-0.758977	>tr|A0A5F9CAP0|A0A5F9CAP0_RABIT Uncharacterized protein OS=Oryctolagus cuniculus OX=9986 PE=4 SV=1
5	K.GETGETGHGN[+3663.286]C[+57.021]SSAKC[+57.021]C[+57.021]QTNPVMTAFEDLAVYFTWEEWQKMNNAQK.I-NeuAc(4)Fuc(1)Hex(7)HexNAc(6)	-5.20525	-5.94108	-5.96318	-6.14131	-0.684957	>tr|A0A5F9DI25|A0A5F9DI25_RABIT Uncharacterized protein OS=Oryctolagus cuniculus OX=9986 PE=4 SV=1
5	K.GIPMPN[+2407.852]K.T-NeuAc(2)Hex(5)HexNAc(5)	-5.92675	-5.38723	-6.22618	-5.90295	-0.684957	>tr|G1SQ70|G1SQ70_RABIT Alpha-2-macroglobulin OS=Oryctolagus cuniculus OX=9986 GN=A2M PE=3 SV=3
5	K.GN[+1024.359]ATALFLLPDEGK.L-Pent(1)Hex(3)HexNAc(2)	-6.31419	-5.67428	-5.99603	-5.85722	-0.684957	>tr|G1TGM8|G1TGM8_RABIT SERPIN domain-containing protein OS=Oryctolagus cuniculus OX=9986 GN=SERPINA1 PE=3 SV=1
5	K.GN[+2569.905]ATALFLLPDEGK.L-NeuAc(2)Hex(6)HexNAc(5)	-5.67925	-6.12417	-6.25004	-5.90494	-0.660497	>tr|G1TGM8|G1TGM8_RABIT SERPIN domain-containing protein OS=Oryctolagus cuniculus OX=9986 GN=SERPINA1 PE=3 SV=1
5	K.GN[+3517.228]ATALFLLPDEGK.L-NeuAc(4)Hex(7)HexNAc(6)	-6.14519	-5.40323	-5.30733	-6.16726	-0.758977	>tr|G1TGM8|G1TGM8_RABIT SERPIN domain-containing protein OS=Oryctolagus cuniculus OX=9986 GN=SERPINA1 PE=3 SV=1
5	K.GN[+876.322]K.S-Fuc(1)Hex(2)HexNAc(2)	-5.60763	-6.47221	-6.15884	-6.32273	-0.660497	>tr|A0A5F9CIL5|A0A5F9CIL5_RABIT Complement C3d receptor 2 OS=Oryctolagus cuniculus OX=9986 GN=CR2 PE=4 SV=1
5	K.GVPIPN[+1548.545]ETIFIQAHSANFFLK.A-NeuAc(1)Hex(4)HexNAc(3)	-5.86316	-6.34543	-6.50707	-6.27126	-0.758977	>tr|G1TR31|G1TR31_RABIT Uncharacterized protein OS=Oryctolagus cuniculus OX=9986 PE=3 SV=3
5	K.GVPIPN[+1751.624]ETIFIQAYSANFFLK.A-NeuAc(1)Hex(4)HexNAc(4)	-5.94885	-5.6113	-5.78891	-6.14256	-0.758977	>tr|A0A5F9DI97|A0A5F9DI97_RABIT Uncharacterized protein OS=Oryctolagus cuniculus OX=9986 PE=3 SV=1
5	K.GVPIPN[+3663.286]ETIFIQAYSANFFLK.A-NeuAc(4)Fuc(1)Hex(7)HexNAc(6)	-6.47072	-6.28159	-5.7897	-5.85446	-0.684957	>tr|A0A5F9DI97|A0A5F9DI97_RABIT Uncharacterized protein OS=Oryctolagus cuniculus OX=9986 PE=3 SV=1
5	K.HGSSHC[+57.021]C[+57.021]N[+2133.772]TSNTAR.H-Fuc(1)Hex(6)HexNAc(5)	-5.92614	-6.01498	-6.0759	-5.96539	-0.660497	>tr|G1TZC1|G1TZC1_RABIT Uncharacterized protein OS=Oryctolagus cuniculus OX=9986 PE=4 SV=2
5	K.HGVIIGSIVGTYEN[+2245.799]GSSIEYQC[+57.021]FDHYFLQGSREVYC[+57.021]VEGVWTTPPQC[+57.021]LEPC[+57.021]ILSFFEMEK.N-NeuAc(2)Hex(4)HexNAc(5)	-6.08685	-6.25872	-6.52786	-6.25588	-0.758977	>tr|G1SEL4|G1SEL4_RABIT Coagulation factor XIII B chain OS=Oryctolagus cuniculus OX=9986 GN=F13B PE=4 SV=3
5	K.HN[+1200.428]FSFK.Y-Fuc(1)Hex(4)HexNAc(2)	-6.67947	-6.1494	-6.11784	-5.67216	-0.684957	>tr|A0A5F9CD07|A0A5F9CD07_RABIT Complement C5 OS=Oryctolagus cuniculus OX=9986 GN=C5 PE=4 SV=1
5	K.HVFSLN[+2861.000]K.S-NeuAc(3)Hex(6)HexNAc(5)	0.443085155640002	0.0231948303368528	-0.668729	-0.163202	0.629809692619295	>tr|G1TR31|G1TR31_RABIT Uncharacterized protein OS=Oryctolagus cuniculus OX=9986 PE=3 SV=3
5	K.HVFSLN[+3007.058]K.S-NeuAc(3)Fuc(1)Hex(6)HexNAc(5)	-5.52663	-6.44334	-6.19644	-6.27852	-0.660497	>tr|G1TR31|G1TR31_RABIT Uncharacterized protein OS=Oryctolagus cuniculus OX=9986 PE=3 SV=3
5	K.IEC[+57.021]VDGN[+1907.714]WTTLPTC[+57.021]IEEESTC[+57.021]GDIPELEHGYVEPSAPPYHHGDSVAFSC[+57.021]R.E-Hex(3)HexNAc(7)	-6.04669	-6.08641	-6.20682	-6.11174	-0.660497	>tr|A0A5F9CG95|A0A5F9CG95_RABIT Uncharacterized protein OS=Oryctolagus cuniculus OX=9986 PE=4 SV=1
5	K.IITFLEEEVN[+1751.624]VSVC[+57.021]GIYTYGK.A-NeuAc(1)Hex(4)HexNAc(4)	-5.81633	-5.51797	-5.87233	-5.8681	-0.758977	>tr|G1SQ70|G1SQ70_RABIT Alpha-2-macroglobulin OS=Oryctolagus cuniculus OX=9986 GN=A2M PE=3 SV=3
5	K.INDVVQHYWDVVVQAFVQN[+2100.761]GTVSTKEFLC[+57.021]DGDR.S-NeuAc(1)Fuc(1)Hex(4)HexNAc(5)	-5.96134	-5.87253	-6.10817	-6.02631	-0.758977	>tr|A0A5F9CG60|A0A5F9CG60_RABIT Lysosomal associated membrane protein 2 OS=Oryctolagus cuniculus OX=9986 GN=LAMP2 PE=3 SV=1
5	K.ISETGHDIALIQLQAPLN[+2861.000]DTDIQKPIC[+57.021]LPSK.D-NeuAc(3)Hex(6)HexNAc(5)	-5.65355	-6.3195	-5.89692	-5.93254	-0.660497	>tr|G1T127|G1T127_RABIT Kallikrein B1 OS=Oryctolagus cuniculus OX=9986 GN=KLKB1 PE=4 SV=2
5	K.IVNKNNVKC[+57.021]LQHFYGPNHEHC[+57.021]FN[+1200.428]R.T-Fuc(1)Hex(4)HexNAc(2)	-6.24335	-5.87764	-6.11901	-6.29812	-0.660497	>sp|Q09YN5|MET_RABIT Hepatocyte growth factor receptor OS=Oryctolagus cuniculus OX=9986 GN=MET PE=3 SV=1
5	K.KALASLSGSN[+3517.228]RSWSILMVR.P-NeuAc(4)Hex(7)HexNAc(6)	-5.9865	-5.94232	-5.97135	-5.69475	-0.660497	>tr|G1SCJ8|G1SCJ8_RABIT Plasma protease C1 inhibitor OS=Oryctolagus cuniculus OX=9986 GN=SERPING1 PE=3 SV=3
5	K.KDPQQDYHLEYAMEN[+1565.560]STHTIIEFSRELHTC[+57.021]DTNDK.S-Fuc(1)Hex(5)HexNAc(3)	-6.21454	-6.34852	-6.15309	-5.64483	-0.684957	>tr|G1SV85|G1SV85_RABIT Monooxygenase DBH like 1 OS=Oryctolagus cuniculus OX=9986 GN=MOXD1 PE=3 SV=3
5	K.KN[+1850.693]HTAVLEK.H-Fuc(1)Hex(3)HexNAc(6)	-6.07535	-5.97729	-5.57406	-5.888	-0.758977	>tr|G1TZA1|G1TZA1_RABIT C1q domain-containing protein OS=Oryctolagus cuniculus OX=9986 PE=4 SV=2
5	K.KN[+3517.228]LTR.E-NeuAc(4)Hex(7)HexNAc(6)	-6.01952	-6.80688	-6.67848	-5.89713	-0.758977	>tr|A0A4Z2D8Z3|A0A4Z2D8Z3_SCHJA Transient receptor potential cation channel subfamily M member 7 OS=Schistosoma japonicum OX=6182 GN=EWB00_003312 PE=4 SV=1
5	K.KPDDISIDVTIN[+2204.772]ESLSYSKTEDETR.T-NeuAc(2)Hex(5)HexNAc(4)	-6.49118	-6.19141	-5.78599	-6.15617	-0.660497	>tr|A0A5F9C6E6|A0A5F9C6E6_RABIT Interleukin 1 receptor accessory protein OS=Oryctolagus cuniculus OX=9986 GN=IL1RAP PE=3 SV=1
5	K.LDAPTNLQFVN[+2262.814]ETDSSVLVIWTPPR.A-NeuAc(1)Fuc(1)Hex(5)HexNAc(5)	-5.46822	-6.18203	-5.87309	-6.00983	-0.684957	>tr|A0A5F9CJW0|A0A5F9CJW0_RABIT Fibronectin OS=Oryctolagus cuniculus OX=9986 GN=FN1 PE=4 SV=1
5	K.LGAC[+57.021]N[+730.264]DTLK.Q-Hex(2)HexNAc(2)	-6.40983	-5.62124	-5.98407	-5.58363	-0.684957	>tr|G1SIK0|G1SIK0_RABIT Antithrombin-III OS=Oryctolagus cuniculus OX=9986 GN=SERPINC1 PE=3 SV=1
5	K.LGTKYSDFN[+2424.867]NSPFR.K-NeuAc(1)Fuc(1)Hex(6)HexNAc(5)	-6.22586	-5.58906	-6.44531	-5.72453	2.47929337432661	>tr|A0A5F9D3S6|A0A5F9D3S6_RABIT Uncharacterized protein OS=Oryctolagus cuniculus OX=9986 PE=4 SV=1
5	K.LHINHNN[+2206.813]LTESVGPLPK.S-Fuc(4)Hex(5)HexNAc(4)	-5.83927	-5.62077	-5.40361	-5.89696	-0.660497	>tr|G1SP97|G1SP97_RABIT Lumican OS=Oryctolagus cuniculus OX=9986 GN=LUM PE=3 SV=1
5	K.LN[+1225.460]NSVIFK.I-Fuc(2)Hex(2)HexNAc(3)	-5.89068	-5.63332	-5.6041	-5.84771	-0.758977	>tr|G1U9R4|G1U9R4_RABIT Apolipoprotein B OS=Oryctolagus cuniculus OX=9986 GN=APOB PE=4 SV=2
5	K.LN[+1711.618]STR.I-Fuc(2)Hex(5)HexNAc(3)	-5.92995	-6.0521	-5.53245	-5.51675	-0.660497	>tr|G1TL36|G1TL36_RABIT Ubiquitin specific peptidase 34 OS=Oryctolagus cuniculus OX=9986 GN=USP34 PE=4 SV=2
5	K.LN[+1913.677]MTIPDLLGLR.L-NeuAc(1)Hex(5)HexNAc(4)	-5.64181	-5.8008	-5.74181	-6.15576	0.184494671254987	>tr|G1SS91|G1SS91_RABIT C4a anaphylatoxin OS=Oryctolagus cuniculus OX=9986 PE=4 SV=2
5	K.LN[+2245.799]GSFPGPLQPIVFQEALYNHR.G-NeuAc(2)Hex(4)HexNAc(5)	-6.10864	-6.11549	-6.34521	-5.99478	-0.758977	>tr|G1U575|G1U575_RABIT C1q domain-containing protein OS=Oryctolagus cuniculus OX=9986 PE=4 SV=2
5	K.LPKAN[+2407.852]FTEIQK.L-NeuAc(2)Hex(5)HexNAc(5)	-5.8456	-5.7141	-6.07295	-6.22082	-0.684957	>tr|A0A5F9D486|A0A5F9D486_RABIT Alpha fetoprotein OS=Oryctolagus cuniculus OX=9986 GN=AFP PE=4 SV=1
5	K.LSAITLVSATSTTAN[+1316.475]MTVSSEGRWIISSFIPKHFQAGMQAYLDIK.N-Fuc(2)Pent(1)Hex(3)HexNAc(2)	-6.26198	-6.11905	-5.69267	-5.49831	-0.660497	>tr|A0A5F9CYY5|A0A5F9CYY5_RABIT Coagulation factor V OS=Oryctolagus cuniculus OX=9986 GN=F5 PE=3 SV=1
5	K.LSNELC[+57.021]NNNGHSYDNLYN[+4028.418]NSIDNELC[+57.021]HC[+57.021]NASIDIR.S-NeuAc(4)Fuc(1)Hex(8)HexNAc(7)	-6.08906	-6.09487	-6.38077	-6.22227	-0.660497	>tr|A0A4Z2D2P3|A0A4Z2D2P3_SCHJA Asparagine-rich protein (ARP) (Fragment) OS=Schistosoma japonicum OX=6182 GN=EWB00_005194 PE=4 SV=1
5	K.LVKEVVSLTEDC[+57.021]C[+57.021]AEDADPGC[+57.021]YDN[+2278.809]R.T-NeuAc(1)Hex(6)HexNAc(5)	-6.29017	-5.7958	-5.79688	-6.4213	-0.672672	>tr|G1SU82|G1SU82_RABIT Gc-globulin OS=Oryctolagus cuniculus OX=9986 GN=GC PE=4 SV=2
5	K.MYKPSTGN[+1914.697]NSLFQDTAVFEC[+57.021]LPR.Y-Fuc(2)Hex(5)HexNAc(4)	-6.2212	-5.98063	-5.92068	-6.02638	-0.684957	>tr|G1SJM1|G1SJM1_RABIT Apolipoprotein H OS=Oryctolagus cuniculus OX=9986 GN=CEP112 PE=4 SV=2
5	K.N[+1184.433]C[+57.021]TR.S-Fuc(2)Hex(3)HexNAc(2)	-6.01432	-6.1747	-6.19683	-5.71406	-0.758977	>tr|G1SEL1|G1SEL1_RABIT Complement factor H related 5 OS=Oryctolagus cuniculus OX=9986 GN=CFHR5 PE=4 SV=2
5	K.N[+1200.428]C[+57.021]TR.S-Fuc(1)Hex(4)HexNAc(2)	-6.04327	-6.66335	-6.28951	-6.23288	-0.684957	>tr|G1SEL1|G1SEL1_RABIT Complement factor H related 5 OS=Oryctolagus cuniculus OX=9986 GN=CFHR5 PE=4 SV=2
5	K.N[+1548.545]VTK.D-NeuAc(1)Hex(4)HexNAc(3)	-5.99442	-5.94225	-5.52842	-6.52315	-0.684957	>tr|G1U128|G1U128_RABIT Mannan binding lectin serine peptidase 1 OS=Oryctolagus cuniculus OX=9986 GN=MASP1 PE=4 SV=3
5	K.N[+1606.587]FTVNDILVR.I-Fuc(1)Hex(4)HexNAc(4)	-5.60447	-6.03402	-5.90507	-5.78893	-0.660497	>tr|Q28731|Q28731_RABIT Thrombin (Fragment) OS=Oryctolagus cuniculus OX=9986 GN=thrombin PE=2 SV=1
5	K.N[+1864.634]ASR.S-Hex(9)HexNAc(2)	-6.18202	-5.79976	-6.36079	-5.69654	-0.758977	>tr|G1SD43|G1SD43_RABIT Glycosyl-phosphatidylinositol-specific phospholipase D OS=Oryctolagus cuniculus OX=9986 GN=GPLD1 PE=3 SV=3
5	K.N[+1907.714]QTR.E-Hex(3)HexNAc(7)	-6.18773	-5.99535	-5.80428	-5.98239	-0.758977	>tr|U3KPG6|U3KPG6_RABIT Intercellular adhesion molecule 1 OS=Oryctolagus cuniculus OX=9986 GN=ICAM1 PE=3 SV=1
5	K.N[+1913.677]VTK.D-NeuAc(1)Hex(5)HexNAc(4)	-6.14028	-5.84175	-6.1542	-5.67002	-0.684957	>tr|G1U128|G1U128_RABIT Mannan binding lectin serine peptidase 1 OS=Oryctolagus cuniculus OX=9986 GN=MASP1 PE=4 SV=3
5	K.N[+1955.724]SSLC[+57.021]ELC[+57.021]IGPSVC[+57.021]APNNR.E-Fuc(2)Hex(4)HexNAc(5)	-6.41296	-5.67	-6.21843	-5.67639	-0.758977	>tr|G1STF7|G1STF7_RABIT Beta-1 metal-binding globulin OS=Oryctolagus cuniculus OX=9986 PE=3 SV=1
5	K.N[+2245.799]VSMSSEC[+57.021]STTPSPGIQVFPIAPSFADTFLSK.S-NeuAc(2)Hex(4)HexNAc(5)	-6.33022	-5.73919	-6.21336	-6.27245	-0.721466	>sp|P03988|IGHM_RABIT Ig mu chain C region secreted form OS=Oryctolagus cuniculus OX=9986 PE=2 SV=1
5	K.N[+2247.840]C[+57.021]TR.S-Fuc(4)Hex(4)HexNAc(5)	-5.78565	-5.63489	-5.5893	-5.59746	-0.660497	>tr|G1SEL1|G1SEL1_RABIT Complement factor H related 5 OS=Oryctolagus cuniculus OX=9986 GN=CFHR5 PE=4 SV=2
5	K.N[+2278.809]GSK.S-NeuAc(1)Hex(6)HexNAc(5)	-5.78522	-6.21259	-6.20676	-6.46228	-0.660497	>tr|A0A5F9D3S6|A0A5F9D3S6_RABIT Uncharacterized protein OS=Oryctolagus cuniculus OX=9986 PE=4 SV=1
5	K.N[+2278.809]KSLR.T-NeuAc(1)Hex(6)HexNAc(5)	-5.86044	-5.89395	-5.90572	-6.06528	-0.660497	>tr|A0A5F9C115|A0A5F9C115_RABIT Ring finger protein 8 OS=Oryctolagus cuniculus OX=9986 GN=RNF8 PE=4 SV=1
5	K.N[+2279.830]VSMSSEC[+57.021]STTPSPGIQVFPIAPSFADTFLSK.S-Fuc(2)Hex(6)HexNAc(5)	-5.78609	-6.10327	-6.07805	-6.2179	-0.758977	>sp|P03988|IGHM_RABIT Ig mu chain C region secreted form OS=Oryctolagus cuniculus OX=9986 PE=2 SV=1
5	K.N[+2352.846]GSK.S-Hex(7)HexNAc(6)	-5.74566	-5.82438	-5.66713	-5.47329	0.283213876956592	>tr|A0A5F9D3S6|A0A5F9D3S6_RABIT Uncharacterized protein OS=Oryctolagus cuniculus OX=9986 PE=4 SV=1
5	K.N[+2352.846]TTC[+57.021]R.D-Hex(7)HexNAc(6)	-6.07657	-5.29667	-5.57181	-5.31898	-0.660497	>tr|G1SS91|G1SS91_RABIT C4a anaphylatoxin OS=Oryctolagus cuniculus OX=9986 PE=4 SV=2
5	K.N[+2498.904]VTNNLK.S-Fuc(1)Hex(7)HexNAc(6)	-5.8471	-5.76871	-5.44134	-6.21848	-0.672672	>tr|G1SY36|G1SY36_RABIT Tropomyosin 4 OS=Oryctolagus cuniculus OX=9986 GN=TPM4 PE=3 SV=2
5	K.N[+2717.978]ESFQC[+57.021]VNGK.N-Hex(8)HexNAc(7)	-5.93673	-6.29422	-5.85297	-6.02864	-0.70885	>tr|A0A5F9CAP0|A0A5F9CAP0_RABIT Uncharacterized protein OS=Oryctolagus cuniculus OX=9986 PE=4 SV=1
5	K.N[+2756.989]HTAVLEK.H-NeuAc(2)Fuc(1)Hex(5)HexNAc(6)	-6.31973	-5.4511	-6.06076	-0.755305	-0.758977	>tr|G1TZA1|G1TZA1_RABIT C1q domain-containing protein OS=Oryctolagus cuniculus OX=9986 PE=4 SV=2
5	K.N[+2861.000]LTMPLLPIEFHK.E-NeuAc(3)Hex(6)HexNAc(5)	-0.778432	-0.581775	-0.866483	-0.657968	0.226327667650856	>tr|G1SWF0|G1SWF0_RABIT Heparin cofactor 2 OS=Oryctolagus cuniculus OX=9986 GN=SERPIND1 PE=3 SV=1
5	K.N[+2861.000]MSK.S-NeuAc(3)Hex(6)HexNAc(5)	-0.778432	-5.71986	-5.74162	-6.65233	-0.684957	>tr|Q9TTJ4|Q9TTJ4_RABIT Inter-alpha-trypsin inhibitor heavy chain H1 OS=Oryctolagus cuniculus OX=9986 GN=ITI HC1 PE=2 SV=1
5	K.N[+3372.190]GSK.S-NeuAc(3)Fuc(1)Hex(7)HexNAc(6)	-5.52949	-6.12361	-6.24783	-6.09057	-0.660497	>tr|A0A5F9D3S6|A0A5F9D3S6_RABIT Uncharacterized protein OS=Oryctolagus cuniculus OX=9986 PE=4 SV=1
5	K.N[+3372.190]HTAVLEK.H-NeuAc(3)Fuc(1)Hex(7)HexNAc(6)	-5.61097	-5.75226	-5.98625	-6.67878	-0.721466	>tr|G1TZA1|G1TZA1_RABIT C1q domain-containing protein OS=Oryctolagus cuniculus OX=9986 PE=4 SV=2
5	K.N[+3372.190]TTALR.L-NeuAc(3)Fuc(1)Hex(7)HexNAc(6)	-6.72374	-5.92603	-6.31546	-6.15441	-0.721466	>tr|A0A5F9DUT3|A0A5F9DUT3_RABIT Uncharacterized protein OS=Oryctolagus cuniculus OX=9986 PE=3 SV=1
5	K.N[+3517.228]FTWYLNTVYPEVYVPELNPVISGYIK.T-NeuAc(4)Hex(7)HexNAc(6)	-5.50204	-6.02293	-6.43033	-6.04143	-0.758977	>tr|G1SMW5|G1SMW5_RABIT Polypeptide N-acetylgalactosaminyltransferase OS=Oryctolagus cuniculus OX=9986 GN=GALNT3 PE=3 SV=1
5	K.N[+3517.228]LSPR.A-NeuAc(4)Hex(7)HexNAc(6)	-5.96071	-5.66309	-6.41419	-6.19901	-0.758977	>tr|G1SDD6|G1SDD6_RABIT Angiotensin 1-10 OS=Oryctolagus cuniculus OX=9986 GN=AGT PE=3 SV=3
5	K.N[+3663.286]HTAVLEKHQVATK.E-NeuAc(4)Fuc(1)Hex(7)HexNAc(6)	-6.02352	-5.60372	-6.03454	-5.88204	-0.660497	>tr|G1TZA1|G1TZA1_RABIT C1q domain-containing protein OS=Oryctolagus cuniculus OX=9986 PE=4 SV=2
5	K.N[+4028.418]C[+57.021]TR.S-NeuAc(4)Fuc(1)Hex(8)HexNAc(7)	-6.14653	-5.60529	-5.80746	-5.77239	-0.758977	>tr|G1SEL1|G1SEL1_RABIT Complement factor H related 5 OS=Oryctolagus cuniculus OX=9986 GN=CFHR5 PE=4 SV=2
5	K.N[+4028.418]LSFMDAMNK.F-NeuAc(4)Fuc(1)Hex(8)HexNAc(7)	-5.87273	-6.1617	-5.72237	-5.47349	-0.758977	>tr|G1SV85|G1SV85_RABIT Monooxygenase DBH like 1 OS=Oryctolagus cuniculus OX=9986 GN=MOXD1 PE=3 SV=3
5	K.N[+4028.418]QTR.E-NeuAc(4)Fuc(1)Hex(8)HexNAc(7)	-6.05959	-5.63658	-6.03882	-0.835796	0.184494671254987	>tr|U3KPG6|U3KPG6_RABIT Intercellular adhesion molecule 1 OS=Oryctolagus cuniculus OX=9986 GN=ICAM1 PE=3 SV=1
5	K.N[+4028.418]VTK.D-NeuAc(4)Fuc(1)Hex(8)HexNAc(7)	-0.563901	0.321463996211357	-0.361877	1.02673831861589	1.42328234488219	>tr|G1U128|G1U128_RABIT Mannan binding lectin serine peptidase 1 OS=Oryctolagus cuniculus OX=9986 GN=MASP1 PE=4 SV=3
5	K.NIDQEFVVMFSVVDEN[+1751.624]LSWYLGDNIKTYC[+57.021]SDPEGVDEDDEDFQESNRMYSVNGYTFGSLPGLSMC[+57.021]AEDR.V-NeuAc(1)Hex(4)HexNAc(4)	-6.2537	-6.02144	-6.11852	-5.51896	-0.660497	>tr|A0A5F9CI66|A0A5F9CI66_RABIT Ceruloplasmin OS=Oryctolagus cuniculus OX=9986 GN=CP PE=3 SV=1
5	K.NLFLNHTEN[+2204.772]ATAQDIAPTLTLYLGR.R-NeuAc(2)Hex(5)HexNAc(4)	-6.03728	-6.47437	-5.75215	-0.835796	-0.125005	>sp|P19007|HPT_RABIT Haptoglobin OS=Oryctolagus cuniculus OX=9986 GN=HP PE=1 SV=2
5	K.NNC[+57.021]LKSGHGNAVN[+1913.677]ITR.A-NeuAc(1)Hex(5)HexNAc(4)	-5.49217	-5.58738	-6.08134	-0.755305	-0.00883865	>sp|P48747|CO9_RABIT Complement component C9 OS=Oryctolagus cuniculus OX=9986 GN=C9 PE=1 SV=1
5	K.PDSAEPMN[+2350.830]R.S-NeuAc(2)Fuc(1)Hex(5)HexNAc(4)	-6.33375	-5.54525	-5.2877	-5.96745	-0.660497	>sp|Q09YN5|MET_RABIT Hepatocyte growth factor receptor OS=Oryctolagus cuniculus OX=9986 GN=MET PE=3 SV=1
5	K.PEADVIEQC[+57.021]SDGWSFDATTLDDN[+1444.534]GTMLFFK.D-Fuc(1)Hex(3)HexNAc(4)	-6.1019	-5.55026	-6.12007	-5.97663	-0.672672	>tr|G1TVS4|G1TVS4_RABIT Hemopexin OS=Oryctolagus cuniculus OX=9986 GN=TRIM3 PE=3 SV=2
5	K.PFEPENTKEEDFHVN[+1694.603]ATTTVR.V-NeuAc(1)Fuc(1)Hex(4)HexNAc(3)	-6.01882	-5.69551	-5.71096	-6.17548	-0.758977	>tr|A0A5F9DT67|A0A5F9DT67_RABIT SERPIN domain-containing protein OS=Oryctolagus cuniculus OX=9986 GN=SERPINA1 PE=3 SV=1
5	K.PKITYVEN[+3517.228]QTAMELEEQVTLTC[+57.021]EASGDPIPSITWR.T-NeuAc(4)Hex(7)HexNAc(6)	-5.73259	-6.40019	-6.30705	-5.52896	-0.684957	>tr|G1SQI4|G1SQI4_RABIT Neural cell adhesion molecule 1 OS=Oryctolagus cuniculus OX=9986 GN=NCAM1 PE=4 SV=3
5	K.PN[+1606.587]ETKTYFWEVQHHMAPTK.D-Fuc(1)Hex(4)HexNAc(4)	-6.03348	-6.39975	-6.04072	-6.05311	-0.684957	>tr|A0A5F9DUT3|A0A5F9DUT3_RABIT Uncharacterized protein OS=Oryctolagus cuniculus OX=9986 PE=3 SV=1
5	K.PPKC[+57.021]LHAC[+57.021]VISEEIMEKYN[+2553.910]ITLK.W-NeuAc(2)Fuc(1)Hex(5)HexNAc(5)	-6.0261	-5.69177	-5.91546	-0.755305	-0.660497	>tr|A0A5F9CSQ9|A0A5F9CSQ9_RABIT Uncharacterized protein OS=Oryctolagus cuniculus OX=9986 PE=4 SV=1
5	K.PTFYAYIN[+2204.772]R.T-NeuAc(2)Hex(5)HexNAc(4)	-5.94945	-6.39997	-6.14859	-6.12755	-0.116839	>tr|A0A2H4E7E3|A0A2H4E7E3_SCHJA Frizzled-4 OS=Schistosoma japonicum OX=6182 PE=2 SV=1
5	K.PVDPDPWKSDKQFN[+2133.772]ATVIIR.S-Fuc(1)Hex(6)HexNAc(5)	-6.00356	-6.51261	-6.17648	-5.68364	-0.684957	>tr|A0A5F9CFZ9|A0A5F9CFZ9_RABIT Uncharacterized protein OS=Oryctolagus cuniculus OX=9986 PE=4 SV=1
5	K.QNNFN[+1225.460]R.T-Fuc(2)Hex(2)HexNAc(3)	-6.4991	-6.51791	-6.60897	-6.17706	-0.684957	>tr|A0A4Z2CPI5|A0A4Z2CPI5_SCHJA Myosin heavy chain, striated muscle OS=Schistosoma japonicum OX=6182 GN=EWB00_008791 PE=3 SV=1
5	K.SAAC[+57.021]DVVYN[+2279.830]STK.R-Fuc(2)Hex(6)HexNAc(5)	-5.39828	-5.80561	-5.44787	-5.8643	-0.758977	>tr|A0A5F9DB98|A0A5F9DB98_RABIT Uncharacterized protein OS=Oryctolagus cuniculus OX=9986 PE=4 SV=1
5	K.SEFIN[+1913.677]SSC[+57.021]EMYHPDK.L-NeuAc(1)Hex(5)HexNAc(4)	-6.13632	-6.3621	-6.04041	-5.99422	-0.660497	>tr|A0A4Z2CT77|A0A4Z2CT77_SCHJA Copine-8 isoform 2 OS=Schistosoma japonicum OX=6182 GN=EWB00_007700 PE=3 SV=1
5	K.SLGSVN[+2204.772]FTVSAEALESQELC[+57.021]ENEVAVVPEHGK.K-NeuAc(2)Hex(5)HexNAc(4)	2.81607791442633	2.74877395947758	1.90534001779605	3.4363445775603	3.85926504902316	>tr|G1SQ70|G1SQ70_RABIT Alpha-2-macroglobulin OS=Oryctolagus cuniculus OX=9986 GN=A2M PE=3 SV=3
5	K.SLGSVN[+714.269]FTVSAEALESQELC[+57.021]ENEVAVVPEHGK.K-Fuc(1)Hex(1)HexNAc(2)	-6.01682	-5.98493	-5.31247	-6.07743	0.184494671254987	>tr|G1SQ70|G1SQ70_RABIT Alpha-2-macroglobulin OS=Oryctolagus cuniculus OX=9986 GN=A2M PE=3 SV=3
5	K.SLYNRMFGWLVARVN[+1063.407]K.T-Fuc(2)Hex(1)HexNAc(3)	-5.90395	-6.05799	-6.37701	-6.02902	-0.684957	>tr|A0A4Z2CPI5|A0A4Z2CPI5_SCHJA Myosin heavy chain, striated muscle OS=Schistosoma japonicum OX=6182 GN=EWB00_008791 PE=3 SV=1
5	K.SMTN[+2190.793]R.T-Hex(6)HexNAc(6)	-6.01875	-6.18969	-5.35961	-6.07326	-0.684957	>tr|G1SWF0|G1SWF0_RABIT Heparin cofactor 2 OS=Oryctolagus cuniculus OX=9986 GN=SERPIND1 PE=3 SV=1
5	K.SMTN[+2204.772]R.T-NeuAc(2)Hex(5)HexNAc(4)	0.443085155640002	-0.581775	-0.0364198	-0.242912	0.577650057116624	>tr|G1SWF0|G1SWF0_RABIT Heparin cofactor 2 OS=Oryctolagus cuniculus OX=9986 GN=SERPIND1 PE=3 SV=1
5	K.SN[+1565.560]LTLAR.L-Fuc(1)Hex(5)HexNAc(3)	-5.94515	-6.11151	-6.02168	-6.16866	-0.660497	>tr|A0A5F9D3S6|A0A5F9D3S6_RABIT Uncharacterized protein OS=Oryctolagus cuniculus OX=9986 PE=4 SV=1
5	K.SWSQSSSLMYTVNGYVN[+1548.545]GTMPAGMQAYLDIK.N-NeuAc(1)Hex(4)HexNAc(3)	-6.15785	-6.67288	-6.01453	-6.07292	-0.758977	>tr|A0A5F9DND9|A0A5F9DND9_RABIT Coagulation factor V OS=Oryctolagus cuniculus OX=9986 GN=F5 PE=3 SV=1
5	K.SWSQSSSLMYTVNGYVN[+4028.418]GTMPAGMQAYLDIK.N-NeuAc(4)Fuc(1)Hex(8)HexNAc(7)	-6.46242	-5.99531	-6.05769	-6.20479	-0.758977	>tr|A0A5F9DND9|A0A5F9DND9_RABIT Coagulation factor V OS=Oryctolagus cuniculus OX=9986 GN=F5 PE=3 SV=1
5	K.TEN[+1501.555]GSVC[+57.021]TTK.I-Hex(3)HexNAc(5)	-5.78542	-5.66035	-6.1887	-6.39329	-0.684957	>tr|G1T127|G1T127_RABIT Kallikrein B1 OS=Oryctolagus cuniculus OX=9986 GN=KLKB1 PE=4 SV=2
5	K.TINNIFIPAMGNITYEFSFKSTIITLNTNAGLYN[+1095.397]QSDIVAHILSSSSSVIDALQYK.L-Hex(3)HexNAc(3)	-5.95419	-5.50281	-6.20821	-6.03974	-0.660497	>tr|G1U9R4|G1U9R4_RABIT Apolipoprotein B OS=Oryctolagus cuniculus OX=9986 GN=APOB PE=4 SV=2
5	K.TLN[+2204.772]LTC[+57.021]TVFGNPDPEVVWFK.N-NeuAc(2)Hex(5)HexNAc(4)	-6.19442	-6.40068	-5.97331	-5.91301	0.271009936095704	>tr|G1T4T6|G1T4T6_RABIT Myomesin 2 OS=Oryctolagus cuniculus OX=9986 GN=MYOM2 PE=4 SV=2
5	K.TLNN[+1444.534]K.S-Fuc(1)Hex(3)HexNAc(4)	-6.05995	-5.84114	-5.69115	-6.1317	-0.684957	>tr|A0A4Z2D2P3|A0A4Z2D2P3_SCHJA Asparagine-rich protein (ARP) (Fragment) OS=Schistosoma japonicum OX=6182 GN=EWB00_005194 PE=4 SV=1
5	K.TTN[+2076.750]LSMEEQK.E-Fuc(2)Hex(6)HexNAc(4)	-6.40647	-5.9498	-5.86077	-6.16258	-0.758977	>tr|G1SMW5|G1SMW5_RABIT Polypeptide N-acetylgalactosaminyltransferase OS=Oryctolagus cuniculus OX=9986 GN=GALNT3 PE=3 SV=1
5	K.VFVHTPTTN[+1872.651]YTLQDYR.R-NeuAc(1)Hex(6)HexNAc(3)	-5.32444	-5.7048	-5.72309	-6.3372	-0.660497	>tr|G1SVB3|G1SVB3_RABIT Phospholipase A2 group XV OS=Oryctolagus cuniculus OX=9986 GN=PLA2G15 PE=3 SV=1
5	K.VIATRYSDEYQTLRLNDFN[+1850.693]C[+57.021]TTSSVSSALANTK.D-Fuc(1)Hex(3)HexNAc(6)	-6.03492	-6.33318	-5.89413	-6.19941	-0.758977	>tr|G1U754|G1U754_RABIT Histidine-rich glycoprotein OS=Oryctolagus cuniculus OX=9986 GN=HRG PE=4 SV=3
5	K.VLNQELRPDGTVNQIEGQATQSN[+2060.755]LTEPAK.L-Fuc(3)Hex(5)HexNAc(4)	-5.94945	-5.76595	-5.78603	-0.835796	-0.157489	>sp|P37153|APOD_RABIT Apolipoprotein D OS=Oryctolagus cuniculus OX=9986 GN=APOD PE=2 SV=1
5	K.VLNQELRPDGTVNQIEGQATQSN[+2350.830]LTEPAK.L-NeuAc(2)Fuc(1)Hex(5)HexNAc(4)	0.721839581082141	0.0157761487075127	0.194309911906466	0.787817394454201	1.20223828124371	>sp|P37153|APOD_RABIT Apolipoprotein D OS=Oryctolagus cuniculus OX=9986 GN=APOD PE=2 SV=1
5	K.VN[+1403.507]FTATAEALHPQELC[+57.021]DNEVAEVPALGQK.D-Fuc(1)Hex(4)HexNAc(3)	-6.75433	-5.96189	-6.00653	-5.44744	0.184494671254987	>tr|A0A5F9C1C5|A0A5F9C1C5_RABIT Uncharacterized protein OS=Oryctolagus cuniculus OX=9986 PE=3 SV=1
5	K.VN[+2350.830]LTVWDFPLR.K-NeuAc(2)Fuc(1)Hex(5)HexNAc(4)	-6.65696	-6.014	-5.95582	-6.06609	-0.660497	>tr|G1SYK4|G1SYK4_RABIT Uncharacterized protein OS=Oryctolagus cuniculus OX=9986 PE=4 SV=2
5	K.VTMPKIITFLEEEVN[+1914.697]VSVC[+57.021]GIYTYGKAVPGHVTMK.I-Fuc(2)Hex(5)HexNAc(4)	-6.20073	-5.90937	-5.83527	-6.06271	-0.684957	>tr|G1SQ70|G1SQ70_RABIT Alpha-2-macroglobulin OS=Oryctolagus cuniculus OX=9986 GN=A2M PE=3 SV=3
5	K.YKISETGHDIALIQLQAPLN[+1914.697]DTDIQKPIC[+57.021]LPSK.D-Fuc(2)Hex(5)HexNAc(4)	-5.77458	-6.18665	-5.55028	-6.30206	-0.660497	>tr|G1T127|G1T127_RABIT Kallikrein B1 OS=Oryctolagus cuniculus OX=9986 GN=KLKB1 PE=4 SV=2
5	K.YLN[+2247.840]ETHQLTPELK.S-Fuc(4)Hex(4)HexNAc(5)	-6.23687	-6.03423	-6.26386	-5.7161	-0.758977	>tr|G1TR31|G1TR31_RABIT Uncharacterized protein OS=Oryctolagus cuniculus OX=9986 PE=3 SV=3
5	K.YLN[+2569.905]ETQQLTPELK.S-NeuAc(2)Hex(6)HexNAc(5)	-6.06904	-6.3556	-6.44238	-5.82755	-0.758977	>tr|A0A5F9DI97|A0A5F9DI97_RABIT Uncharacterized protein OS=Oryctolagus cuniculus OX=9986 PE=3 SV=1
5	K.YN[+568.212]K.S-Hex(1)HexNAc(2)	-5.91653	-6.17029	-6.12345	-5.76981	-0.684957	>tr|A0A5F9DBJ1|A0A5F9DBJ1_RABIT Actin-depolymerizing factor OS=Oryctolagus cuniculus OX=9986 GN=GSN PE=3 SV=1
5	K.YNDRN[+1225.460]K.S-Fuc(2)Hex(2)HexNAc(3)	-6.29337	-5.45468	-5.98497	-5.97007	-0.684957	>tr|A0A5F9CHF0|A0A5F9CHF0_RABIT Kininogen 1 OS=Oryctolagus cuniculus OX=9986 GN=KNG1 PE=4 SV=1
5	K.YVMLPVADQDKC[+57.021]IQHYEN[+1872.651]STVPENK.I-NeuAc(1)Hex(6)HexNAc(3)	-5.73562	-5.48461	-5.99007	-5.74206	-0.758977	>tr|G1SWF6|G1SWF6_RABIT Haptoglobin OS=Oryctolagus cuniculus OX=9986 PE=3 SV=1
5	R.AC[+57.021]RQINEYIEN[+2204.772]KTQGK.I-NeuAc(2)Hex(5)HexNAc(4)	-5.93297	-6.14479	-6.00244	-6.10478	0.283213876956592	>sp|P23775|CBG_RABIT Corticosteroid-binding globulin OS=Oryctolagus cuniculus OX=9986 GN=SERPINA6 PE=1 SV=1
5	R.AGLTSRPHTAVDSELPPN[+1702.581]VSVFIPPR.D-Hex(8)HexNAc(2)	-6.11831	-5.70247	-5.69537	-6.06425	-0.758977	>tr|G1TK85|G1TK85_RABIT Immunoglobulin heavy constant mu OS=Oryctolagus cuniculus OX=9986 GN=IGHM PE=4 SV=2
5	R.AGPN[+2116.756]GTLFVADAYKGLFEVNPWK.R-NeuAc(1)Hex(5)HexNAc(5)	-5.66033	-6.55988	-5.60721	-6.2094	-0.684957	>tr|A0A5F9CGZ9|A0A5F9CGZ9_RABIT Adipocyte plasma membrane-associated protein OS=Oryctolagus cuniculus OX=9986 GN=APMAP PE=3 SV=1
5	R.AIINDWISN[+2569.905]K.T-NeuAc(2)Hex(6)HexNAc(5)	0.512465759771075	0.315478223114547	0.571706666232855	0.33895937945874	0.795580608877871	>tr|G1SIK0|G1SIK0_RABIT Antithrombin-III OS=Oryctolagus cuniculus OX=9986 GN=SERPINC1 PE=3 SV=1
5	R.ANEANYNSAATTDEQGLVQFSIN[+2204.772]TTNVMGTSLTVR.A-NeuAc(2)Hex(5)HexNAc(4)	-5.78664	-5.94066	-6.6644	-6.05204	-0.758977	>tr|G1SQ70|G1SQ70_RABIT Alpha-2-macroglobulin OS=Oryctolagus cuniculus OX=9986 GN=A2M PE=3 SV=3
5	R.AVSVVDSAN[+1914.697]YSC[+57.021]VYVDPAPPFAGSVASEPLELR.V-Fuc(2)Hex(5)HexNAc(4)	-6.07447	-5.71178	-6.66632	-6.10901	-0.660497	>tr|G1SYM4|G1SYM4_RABIT Alpha-1B-glycoprotein OS=Oryctolagus cuniculus OX=9986 GN=A1BG PE=4 SV=2
5	R.AYIQN[+2204.772]QSVK.V-NeuAc(2)Hex(5)HexNAc(4)	-0.667458	-0.646255	-0.591287	-0.576258	-0.305489	>tr|A0A5F9CSQ9|A0A5F9CSQ9_RABIT Uncharacterized protein OS=Oryctolagus cuniculus OX=9986 PE=4 SV=1
5	R.C[+57.021]EELHLHAEN[+2245.799]LSRR.V-NeuAc(2)Hex(4)HexNAc(5)	-5.82717	-6.0039	-5.44891	-5.50584	-0.660497	>tr|G1TL36|G1TL36_RABIT Ubiquitin specific peptidase 34 OS=Oryctolagus cuniculus OX=9986 GN=USP34 PE=4 SV=2
5	R.C[+57.021]GLVPVLAESYDTTN[+2204.772]ATEK.L-NeuAc(2)Hex(5)HexNAc(4)	1.07107165736989	0.556946564632651	0.660496472425597	0.841348900826128	1.19619158929734	>tr|G1TKE4|G1TKE4_RABIT Uncharacterized protein OS=Oryctolagus cuniculus OX=9986 PE=3 SV=1
5	R.C[+57.021]QGRN[+1825.661]YTLTGMDSC[+57.021]AVPAAVQK.A-Hex(5)HexNAc(5)	-6.42087	-5.93062	-6.18033	-5.75036	-0.758977	>tr|A0A5F9DPA2|A0A5F9DPA2_RABIT Caspase recruitment domain family member 6 OS=Oryctolagus cuniculus OX=9986 GN=CARD6 PE=3 SV=1
5	R.DLGELVKLYLGSNN[+714.269]LTALHPALFQNLSK.L-Fuc(1)Hex(1)HexNAc(2)	-6.03146	-6.00581	-5.84525	-5.77768	-0.660497	>tr|U3KPI5|U3KPI5_RABIT Carboxypeptidase N subunit 2 OS=Oryctolagus cuniculus OX=9986 GN=CPN2 PE=4 SV=1
5	R.DN[+2569.905]LTDLQEKHPESHFWGPQSLFMR.G-NeuAc(2)Hex(6)HexNAc(5)	-6.13196	-6.0492	-6.21044	-5.8149	-0.660497	>tr|A0A5F9C4B7|A0A5F9C4B7_RABIT Tyrosine 3-monooxygenase/tryptophan 5-monooxygenase activation protein zeta OS=Oryctolagus cuniculus OX=9986 GN=YWHAZ PE=3 SV=1
5	R.EALAIVFFGAQPQPN[+1444.534]VSELLVGPLPHPSYMRDVTVERHGGPLPYYR.R-Fuc(1)Hex(3)HexNAc(4)	-5.94606	-6.10894	-5.87989	-5.73496	-0.684957	>tr|A0A5F9DI44|A0A5F9DI44_RABIT Amine oxidase OS=Oryctolagus cuniculus OX=9986 GN=AOC3 PE=3 SV=1
5	R.EGHFYYN[+1694.603]ISDVK.V-NeuAc(1)Fuc(1)Hex(4)HexNAc(3)	-5.88315	-6.35889	-6.2288	-5.63097	-0.758977	>tr|Q8WMQ5|Q8WMQ5_RABIT Phospholipid transfer protein OS=Oryctolagus cuniculus OX=9986 GN=PLTP PE=2 SV=1
5	R.ELN[+1710.598]YTR.Q-NeuAc(1)Hex(5)HexNAc(3)	-0.629762	-0.646255	-0.866483	-0.657968	-0.305489	>tr|G1SIS0|G1SIS0_RABIT Patched 1 OS=Oryctolagus cuniculus OX=9986 GN=PTCH1 PE=3 SV=3
5	R.ELN[+2861.000]YTR.Q-NeuAc(3)Hex(6)HexNAc(5)	-0.563901	-5.61425	-5.44318	-5.66177	-0.157489	>tr|G1SIS0|G1SIS0_RABIT Patched 1 OS=Oryctolagus cuniculus OX=9986 GN=PTCH1 PE=3 SV=3
5	R.EN[+1054.370]ISDPTSPLR.T-Hex(4)HexNAc(2)	-6.36666	-6.29398	-5.33966	-5.7865	-0.684957	>sp|P23108|IGJ_RABIT Immunoglobulin J chain OS=Oryctolagus cuniculus OX=9986 GN=JCHAIN PE=1 SV=1
5	R.FDEFFRQGC[+57.021]APGSQKN[+1095.397]SSLC[+57.021]ELC[+57.021]IGPSVC[+57.021]APNNR.E-Hex(3)HexNAc(3)	-5.21807	-6.46728	-6.16965	-5.84337	-0.660497	>tr|G1STF7|G1STF7_RABIT Beta-1 metal-binding globulin OS=Oryctolagus cuniculus OX=9986 PE=3 SV=1
5	R.FEAGQVNVVLIPNN[+2059.735]GTGGWWSLK.L-NeuAc(1)Fuc(1)Hex(5)HexNAc(4)	-5.97927	-6.05402	-6.13572	-5.90793	-0.758977	>tr|A0A5F9DI44|A0A5F9DI44_RABIT Amine oxidase OS=Oryctolagus cuniculus OX=9986 GN=AOC3 PE=3 SV=1
5	R.FHFPENLHIN[+1914.697]STEC[+57.021]LNVR.C-Fuc(2)Hex(5)HexNAc(4)	-6.046	-5.2748	-6.12232	-5.80173	-0.684957	>tr|A0A5F9CAP0|A0A5F9CAP0_RABIT Uncharacterized protein OS=Oryctolagus cuniculus OX=9986 PE=4 SV=1
5	R.FLFYN[+2133.772]R.S-Fuc(1)Hex(6)HexNAc(5)	-6.26101	-5.98493	-6.25979	-6.04592	-0.684957	>tr|G1SU36|G1SU36_RABIT Apolipoprotein M OS=Oryctolagus cuniculus OX=9986 GN=APOM PE=3 SV=1
5	R.GDN[+2350.830]ASLEAVFVK.R-NeuAc(2)Fuc(1)Hex(5)HexNAc(4)	-5.65622	-5.49063	-5.8427	-6.04896	-0.758977	>tr|G1T0Q0|G1T0Q0_RABIT Fibulin 1 OS=Oryctolagus cuniculus OX=9986 GN=FBLN1 PE=3 SV=2
5	R.GEEKEN[+2206.813]LTAQALDLSLK.Y-Fuc(4)Hex(5)HexNAc(4)	-5.87762	-5.7244	-6.25099	-6.01582	-0.758977	>sp|Q9GLY5|ITIH3_RABIT Inter-alpha-trypsin inhibitor heavy chain H3 OS=Oryctolagus cuniculus OX=9986 GN=ITIH3 PE=2 SV=1
5	R.GEQC[+57.021]VDIDEC[+57.021]TVPPYC[+57.021]HQRC[+57.021]VNTPGSFYC[+57.021]QC[+57.021]SPGFQLAANN[+2861.000]YTC[+57.021]VDIDEC[+57.021]R.T-NeuAc(3)Hex(6)HexNAc(5)	-5.85068	-5.93031	-6.09531	-6.22862	-0.758977	>tr|A0A5F9DS81|A0A5F9DS81_RABIT EGF containing fibulin extracellular matrix protein 1 OS=Oryctolagus cuniculus OX=9986 GN=EFEMP1 PE=4 SV=1
5	R.GGPAPAREALAIVFFGAQPQPN[+917.349]VSELLVGPLPHPSYMRDVTVER.H-Fuc(1)Hex(1)HexNAc(3)	-5.93241	-5.85234	-5.67791	-6.25887	-0.758977	>tr|A0A5F9DJG6|A0A5F9DJG6_RABIT Amine oxidase OS=Oryctolagus cuniculus OX=9986 GN=AOC3 PE=3 SV=1
5	R.GIFFDKN[+2263.835]VSMSSEC[+57.021]STTPSPGIQVFPIAPSFADTFLSK.S-Fuc(3)Hex(5)HexNAc(5)	-6.08927	-5.87907	-6.00782	-6.50494	-0.125005	>sp|P03988|IGHM_RABIT Ig mu chain C region secreted form OS=Oryctolagus cuniculus OX=9986 PE=2 SV=1
5	R.GLN[+2206.813]VTLSALGHSGLK.A-Fuc(4)Hex(5)HexNAc(4)	-6.19152	-6.19266	-6.04063	-6.22569	-0.70885	>tr|G1SS91|G1SS91_RABIT C4a anaphylatoxin OS=Oryctolagus cuniculus OX=9986 PE=4 SV=2
5	R.HAGN[+1955.724]YSC[+57.021]R.Y-Fuc(2)Hex(4)HexNAc(5)	-5.77195	-6.35945	-6.21516	-5.95878	-0.660497	>tr|G1SYM4|G1SYM4_RABIT Alpha-1B-glycoprotein OS=Oryctolagus cuniculus OX=9986 GN=A1BG PE=4 SV=2
5	R.HRPFGTN[+1622.582]ETHR.F-Hex(5)HexNAc(4)	-6.21267	-5.67634	-6.05771	-6.28242	-0.684957	>tr|G1U754|G1U754_RABIT Histidine-rich glycoprotein OS=Oryctolagus cuniculus OX=9986 GN=HRG PE=4 SV=3
5	R.HSC[+57.021]AN[+3517.228]DTIC[+57.021]FNLDGGYDC[+57.021]R.C-NeuAc(4)Hex(7)HexNAc(6)	-6.1891	-5.88941	-5.80674	-5.63248	0.184494671254987	>tr|A0A5F9CP03|A0A5F9CP03_RABIT Neural EGFL like 2 OS=Oryctolagus cuniculus OX=9986 GN=NELL2 PE=4 SV=1
5	R.IDGAQNFN[+1378.476]ETWENYKHGFGK.L-Hex(6)HexNAc(2)	-6.17292	-5.49254	-5.86616	-6.20589	-0.758977	>tr|G1SEB2|G1SEB2_RABIT Angiopoietin like 3 OS=Oryctolagus cuniculus OX=9986 GN=ANGPTL3 PE=4 SV=1
5	R.IHYNNNNNNSNNN[+1913.677]R.S-NeuAc(1)Hex(5)HexNAc(4)	-6.0659	-5.88257	-6.20349	-6.33861	-0.758977	>tr|Q5DED3|Q5DED3_SCHJA SJCHGC00752 protein OS=Schistosoma japonicum OX=6182 PE=2 SV=1
5	R.ILYSIAYN[+1913.677]C[+57.021]TLR.P-NeuAc(1)Hex(5)HexNAc(4)	-5.9175	-6.05074	-5.9006	-6.02976	-0.721466	>tr|G1SEK8|G1SEK8_RABIT Fetuin B OS=Oryctolagus cuniculus OX=9986 GN=FETUB PE=4 SV=2
5	R.ILYSIAYN[+2204.772]C[+57.021]TLR.P-NeuAc(2)Hex(5)HexNAc(4)	-0.778432	-6.1119	-5.69907	-6.09986	1.06785755252578	>tr|G1SEK8|G1SEK8_RABIT Fetuin B OS=Oryctolagus cuniculus OX=9986 GN=FETUB PE=4 SV=2
5	R.ISMIMSYIN[+1548.545]C[+57.021]SR.C-NeuAc(1)Hex(4)HexNAc(3)	-5.34316	-6.6266	-6.09182	-6.04445	-0.660497	>tr|A0A2H4E7E3|A0A2H4E7E3_SCHJA Frizzled-4 OS=Schistosoma japonicum OX=6182 PE=2 SV=1
5	R.IVGGSN[+3372.190]SSRGEWPWQVSLQVK.L-NeuAc(3)Fuc(1)Hex(7)HexNAc(6)	-6.02388	-5.34992	-6.01123	-5.85122	-0.660497	>tr|G1T127|G1T127_RABIT Kallikrein B1 OS=Oryctolagus cuniculus OX=9986 GN=KLKB1 PE=4 SV=2
5	R.IVSVDVNFHPVN[+2278.809]ETVSLITNPK.K-NeuAc(1)Hex(6)HexNAc(5)	-6.97597	-5.80638	-5.72825	-6.01504	-0.660497	>tr|A0A5F9C1C5|A0A5F9C1C5_RABIT Uncharacterized protein OS=Oryctolagus cuniculus OX=9986 PE=3 SV=1
5	R.IYSN[+2352.846]QSAIESLALIPLQAPLK.T-Hex(7)HexNAc(6)	-5.72809	-5.84339	-6.23373	-6.00914	-0.684957	>tr|A0A5F9C720|A0A5F9C720_RABIT Phospholipid transfer protein OS=Oryctolagus cuniculus OX=9986 GN=PLTP PE=3 SV=1
5	R.KNFVKPN[+1024.359]ETK.T-Pent(1)Hex(3)HexNAc(2)	-5.79985	-5.44089	-5.88674	-5.5755	-0.758977	>tr|A0A5F9DUT3|A0A5F9DUT3_RABIT Uncharacterized protein OS=Oryctolagus cuniculus OX=9986 PE=3 SV=1
5	R.LGIANPATGFQLEVTPQN[+1095.397]ITLNPSSGGPVFSWR.D-Hex(3)HexNAc(3)	-6.32972	-5.78508	-6.11208	-5.64025	-0.758977	>tr|Q9TTJ4|Q9TTJ4_RABIT Inter-alpha-trypsin inhibitor heavy chain H1 OS=Oryctolagus cuniculus OX=9986 GN=ITI HC1 PE=2 SV=1
5	R.LGLALN[+2424.867]FSVFYYEILNSPEKAC[+57.021]SLAK.T-NeuAc(1)Fuc(1)Hex(6)HexNAc(5)	-6.46027	-6.11118	-5.96852	-5.87081	-0.684957	>tr|A0A5F9C4B7|A0A5F9C4B7_RABIT Tyrosine 3-monooxygenase/tryptophan 5-monooxygenase activation protein zeta OS=Oryctolagus cuniculus OX=9986 GN=YWHAZ PE=3 SV=1
5	R.LGLALN[+2569.905]FSVFYYEILNSPEKAC[+57.021]SLAK.T-NeuAc(2)Hex(6)HexNAc(5)	-6.36189	-6.1601	-5.72659	-6.06094	0.283213876956592	>tr|A0A5F9C4B7|A0A5F9C4B7_RABIT Tyrosine 3-monooxygenase/tryptophan 5-monooxygenase activation protein zeta OS=Oryctolagus cuniculus OX=9986 GN=YWHAZ PE=3 SV=1
5	R.LGMYVMFHC[+57.021]STLASTVVLMDYKGN[+568.212]ATALFLLPDEGK.L-Hex(1)HexNAc(2)	-5.47897	-5.76932	-6.09389	-5.65287	-0.660497	>tr|Q28666|Q28666_RABIT Alpha-1-antitrypsin OS=Oryctolagus cuniculus OX=9986 PE=2 SV=1
5	R.LGMYVMLHC[+57.021]STLASMVLRMDYKGN[+1622.582]ATALFLLPDEGK.L-Hex(5)HexNAc(4)	-6.0518	-6.05603	-5.85727	-6.02721	-0.684957	>tr|G1TFX2|G1TFX2_RABIT SERPIN domain-containing protein OS=Oryctolagus cuniculus OX=9986 GN=SERPINA1 PE=3 SV=2
5	R.LGMYVTLHC[+57.021]STLASTVVLMDYKGN[+2407.852]ATALFLLPDEGK.L-NeuAc(2)Hex(5)HexNAc(5)	-6.2814	-6.06881	-5.62325	-6.30173	0.184494671254987	>tr|O62663|O62663_RABIT ATS-22 OS=Oryctolagus cuniculus OX=9986 PE=2 SV=1
5	R.LLN[+2204.772]ETEGISFDLSWK.E-NeuAc(2)Hex(5)HexNAc(4)	-5.76701	-6.24107	-5.95624	-6.28258	-0.672672	>tr|Q5D9W6|Q5D9W6_SCHJA SJCHGC06245 protein OS=Schistosoma japonicum OX=6182 PE=2 SV=1
5	R.LNDFN[+1751.624]C[+57.021]TTSSVSSALANTK.D-NeuAc(1)Hex(4)HexNAc(4)	-0.563901	-5.32913	-5.60605	-5.77609	0.0057244580162851	>tr|G1U754|G1U754_RABIT Histidine-rich glycoprotein OS=Oryctolagus cuniculus OX=9986 GN=HRG PE=4 SV=3
5	R.LNDFN[+2190.793]C[+57.021]TTSSVSSALANTK.D-Hex(6)HexNAc(6)	-6.27759	-5.90041	-5.73866	-5.8737	-0.758977	>tr|G1U754|G1U754_RABIT Histidine-rich glycoprotein OS=Oryctolagus cuniculus OX=9986 GN=HRG PE=4 SV=3
5	R.LPGNYHFQFDVELQHC[+57.021]N[+568.212]VTVWLK.K-Hex(1)HexNAc(2)	-6.07881	-5.98357	-5.96287	-5.30813	-0.684957	>tr|G1TZA1|G1TZA1_RABIT C1q domain-containing protein OS=Oryctolagus cuniculus OX=9986 PE=4 SV=2
5	R.MDYKGN[+1419.502]ATALFLLPDEGK.L-Hex(5)HexNAc(3)	-6.0462	-6.34796	-5.6859	-6.1673	-0.758977	>tr|G1TGM8|G1TGM8_RABIT SERPIN domain-containing protein OS=Oryctolagus cuniculus OX=9986 GN=SERPINA1 PE=3 SV=1
5	R.MDYKGN[+1694.603]ATALFLLPDEGK.L-NeuAc(1)Fuc(1)Hex(4)HexNAc(3)	-5.44373	-6.41803	-5.88412	-5.67969	-0.684957	>tr|G1TGM8|G1TGM8_RABIT SERPIN domain-containing protein OS=Oryctolagus cuniculus OX=9986 GN=SERPINA1 PE=3 SV=1
5	R.MDYKGN[+1711.618]ATALFLLPDEGK.L-Fuc(2)Hex(5)HexNAc(3)	-6.57125	-6.30058	-5.58207	-6.38256	-0.660497	>tr|G1TGM8|G1TGM8_RABIT SERPIN domain-containing protein OS=Oryctolagus cuniculus OX=9986 GN=SERPINA1 PE=3 SV=1
5	R.MDYKGN[+2204.772]ATALFLLPDEGK.L-NeuAc(2)Hex(5)HexNAc(4)	-5.89221	-5.59548	-5.91459	-5.58965	-0.305489	>tr|G1TGM8|G1TGM8_RABIT SERPIN domain-containing protein OS=Oryctolagus cuniculus OX=9986 GN=SERPINA1 PE=3 SV=1
5	R.MPRSFPFN[+2569.905]TSVIYK.K-NeuAc(2)Hex(6)HexNAc(5)	-5.36564	-6.53275	-6.27359	-5.87872	-0.684957	>tr|A0A5F9DUT3|A0A5F9DUT3_RABIT Uncharacterized protein OS=Oryctolagus cuniculus OX=9986 PE=3 SV=1
5	R.N[+1200.428]LSC[+57.021]VVLR.L-Fuc(1)Hex(4)HexNAc(2)	-6.34072	-5.88889	-6.15636	-6.20975	-0.684957	>tr|G1SQG6|G1SQG6_RABIT SERPIN domain-containing protein OS=Oryctolagus cuniculus OX=9986 PE=3 SV=3
5	R.N[+1257.449]C[+57.021]SR.S-Hex(4)HexNAc(3)	-6.11927	-6.03983	-6.18384	-5.98736	-0.758977	>tr|G1U754|G1U754_RABIT Histidine-rich glycoprotein OS=Oryctolagus cuniculus OX=9986 GN=HRG PE=4 SV=3
5	R.N[+1647.613]LSC[+57.021]VVLR.L-Fuc(1)Hex(3)HexNAc(5)	-0.778432	-5.53348	-6.63134	-6.67174	-0.660497	>tr|G1SQG6|G1SQG6_RABIT SERPIN domain-containing protein OS=Oryctolagus cuniculus OX=9986 PE=3 SV=3
5	R.N[+2076.750]YTLTGMDSC[+57.021]AVPAAVQK.A-Fuc(2)Hex(6)HexNAc(4)	-5.91907	-5.83165	-5.94706	-5.43573	-0.660497	>tr|A0A5F9DPA2|A0A5F9DPA2_RABIT Caspase recruitment domain family member 6 OS=Oryctolagus cuniculus OX=9986 GN=CARD6 PE=3 SV=1
5	R.N[+2204.772]C[+57.021]SR.S-NeuAc(2)Hex(5)HexNAc(4)	-0.778432	-5.85615	-5.92053	-5.96578	-0.684957	>tr|G1U754|G1U754_RABIT Histidine-rich glycoprotein OS=Oryctolagus cuniculus OX=9986 GN=HRG PE=4 SV=3
5	R.N[+2204.772]ISEGFSGIPDNVDAAFALPAHSYSGR.E-NeuAc(2)Hex(5)HexNAc(4)	1.24172866941573	0.653659256935637	0.841931229170787	-0.0150889	1.57861300705436	>tr|G1U415|G1U415_RABIT Vitronectin OS=Oryctolagus cuniculus OX=9986 GN=VTN PE=4 SV=1
5	R.N[+2206.813]C[+57.021]SR.S-Fuc(4)Hex(5)HexNAc(4)	-5.48233	-5.82668	-6.03661	-6.49731	-0.758977	>tr|G1U754|G1U754_RABIT Histidine-rich glycoprotein OS=Oryctolagus cuniculus OX=9986 GN=HRG PE=4 SV=3
5	R.N[+2245.799]C[+57.021]SR.S-NeuAc(2)Hex(4)HexNAc(5)	-5.96927	-5.86378	-5.79543	-5.7438	-0.660497	>tr|G1U754|G1U754_RABIT Histidine-rich glycoprotein OS=Oryctolagus cuniculus OX=9986 GN=HRG PE=4 SV=3
5	R.N[+2352.846]HTHPLKPEIQPFPQVASER.C-Hex(7)HexNAc(6)	-6.27201	-5.87732	-6.19488	-6.13746	-0.758977	>tr|G1U754|G1U754_RABIT Histidine-rich glycoprotein OS=Oryctolagus cuniculus OX=9986 GN=HRG PE=4 SV=3
5	R.N[+2424.867]KTIFK.T-NeuAc(1)Fuc(1)Hex(6)HexNAc(5)	-5.85917	-5.37549	-5.86963	-5.87763	-0.758977	>tr|A0A4Z2D8Z3|A0A4Z2D8Z3_SCHJA Transient receptor potential cation channel subfamily M member 7 OS=Schistosoma japonicum OX=6182 GN=EWB00_003312 PE=4 SV=1
5	R.N[+2457.877]LTPSTTK.D-Fuc(1)Hex(8)HexNAc(5)	-6.07593	-5.38528	-5.91259	-5.84602	-0.758977	>tr|G1SD43|G1SD43_RABIT Glycosyl-phosphatidylinositol-specific phospholipase D OS=Oryctolagus cuniculus OX=9986 GN=GPLD1 PE=3 SV=3
5	R.N[+2553.910]MTAEQALSR.G-NeuAc(2)Fuc(1)Hex(5)HexNAc(5)	-0.778432	-6.12678	-6.5432	-5.93065	-0.660497	>tr|A0A5F9DNQ4|A0A5F9DNQ4_RABIT Coagulation factor XII OS=Oryctolagus cuniculus OX=9986 GN=F12 PE=4 SV=1
5	R.N[+2569.905]HTHPLK.P-NeuAc(2)Hex(6)HexNAc(5)	-6.40401	-6.36732	-5.61174	-6.70065	-0.660497	>tr|G1U754|G1U754_RABIT Histidine-rich glycoprotein OS=Oryctolagus cuniculus OX=9986 GN=HRG PE=4 SV=3
5	R.N[+2569.905]TTYC[+57.021]SK.V-NeuAc(2)Hex(6)HexNAc(5)	-5.79699	-5.82216	-6.23117	-5.64079	-0.660497	>tr|A0A5F9C6E6|A0A5F9C6E6_RABIT Interleukin 1 receptor accessory protein OS=Oryctolagus cuniculus OX=9986 GN=IL1RAP PE=3 SV=1
5	R.N[+2715.963]KTIFK.T-NeuAc(2)Fuc(1)Hex(6)HexNAc(5)	-5.81961	-5.69864	-6.29602	-6.39738	-0.758977	>tr|A0A4Z2D8Z3|A0A4Z2D8Z3_SCHJA Transient receptor potential cation channel subfamily M member 7 OS=Schistosoma japonicum OX=6182 GN=EWB00_003312 PE=4 SV=1
5	R.N[+2861.000]KTIFK.T-NeuAc(3)Hex(6)HexNAc(5)	-6.31511	-5.99517	-5.99823	-6.21496	-0.758977	>tr|A0A4Z2D8Z3|A0A4Z2D8Z3_SCHJA Transient receptor potential cation channel subfamily M member 7 OS=Schistosoma japonicum OX=6182 GN=EWB00_003312 PE=4 SV=1
5	R.N[+2861.000]MTAEQALSR.G-NeuAc(3)Hex(6)HexNAc(5)	-5.50864	-5.81559	-6.03473	-5.77124	-0.684957	>tr|A0A5F9DNQ4|A0A5F9DNQ4_RABIT Coagulation factor XII OS=Oryctolagus cuniculus OX=9986 GN=F12 PE=4 SV=1
5	R.N[+3007.058]LSSDLDSLR.E-NeuAc(3)Fuc(1)Hex(6)HexNAc(5)	-5.89716	-5.7127	-6.09101	-6.31013	-0.684957	>tr|A0A4Z2CPI5|A0A4Z2CPI5_SCHJA Myosin heavy chain, striated muscle OS=Schistosoma japonicum OX=6182 GN=EWB00_008791 PE=3 SV=1
5	R.N[+3372.190]KTIFK.T-NeuAc(3)Fuc(1)Hex(7)HexNAc(6)	-5.72357	-5.67523	-5.83145	-6.11676	0.737251484100417	>tr|A0A4Z2D8Z3|A0A4Z2D8Z3_SCHJA Transient receptor potential cation channel subfamily M member 7 OS=Schistosoma japonicum OX=6182 GN=EWB00_003312 PE=4 SV=1
5	R.N[+3663.286]STLTELLEGLK.F-NeuAc(4)Fuc(1)Hex(7)HexNAc(6)	-5.89105	-5.6606	-6.34719	-5.92072	-0.684957	>tr|G1TM88|G1TM88_RABIT Serpin family A member 3 OS=Oryctolagus cuniculus OX=9986 GN=SERPINA3 PE=3 SV=2
5	R.N[+4028.418]KTIFK.T-NeuAc(4)Fuc(1)Hex(8)HexNAc(7)	-5.60557	-6.40155	-5.84329	-6.16835	0.184494671254987	>tr|A0A4Z2D8Z3|A0A4Z2D8Z3_SCHJA Transient receptor potential cation channel subfamily M member 7 OS=Schistosoma japonicum OX=6182 GN=EWB00_003312 PE=4 SV=1
5	R.NC[+57.021]GVN[+1694.603]C[+57.021]SGDVFTTLIGEITSPNYPRPYPENSR.C-NeuAc(1)Fuc(1)Hex(4)HexNAc(3)	-6.16393	-6.00133	-6.18766	-6.24367	-0.660497	>tr|G1T7G7|G1T7G7_RABIT Complement C1s OS=Oryctolagus cuniculus OX=9986 GN=C1S PE=4 SV=2
5	R.NIN[+2861.000]YTER.G-NeuAc(3)Hex(6)HexNAc(5)	-6.10064	-6.05865	-5.95689	-5.86983	0.184494671254987	>tr|G1SD43|G1SD43_RABIT Glycosyl-phosphatidylinositol-specific phospholipase D OS=Oryctolagus cuniculus OX=9986 GN=GPLD1 PE=3 SV=3
5	R.NIPPGLN[+1751.624]ISC[+57.021]TFHK.T-NeuAc(1)Hex(4)HexNAc(4)	-6.6003	-6.26701	-6.19414	-6.08711	-0.758977	>tr|A0A5F9CKV3|A0A5F9CKV3_RABIT P2X purinoceptor OS=Oryctolagus cuniculus OX=9986 GN=P2RX7 PE=3 SV=1
5	R.NIPPGLN[+1872.651]ISC[+57.021]TFHK.T-NeuAc(1)Hex(6)HexNAc(3)	-6.00524	-5.64066	-5.75135	-5.71602	-0.684957	>tr|A0A5F9CKV3|A0A5F9CKV3_RABIT P2X purinoceptor OS=Oryctolagus cuniculus OX=9986 GN=P2RX7 PE=3 SV=1
5	R.NVILFSVFDEN[+2352.846]QSWYLTENMQR.F-Hex(7)HexNAc(6)	-5.86461	-5.53461	-6.36088	-6.03265	-0.684957	>tr|A0A5F9DUT3|A0A5F9DUT3_RABIT Uncharacterized protein OS=Oryctolagus cuniculus OX=9986 PE=3 SV=1
5	R.NVIRIIPYHKYN[+2263.835]ATINK.Y-Fuc(3)Hex(5)HexNAc(5)	-6.05877	-6.09669	-5.90198	-5.83739	-0.684957	>sp|P16292|FA9_RABIT Coagulation factor IX (Fragment) OS=Oryctolagus cuniculus OX=9986 GN=F9 PE=2 SV=1
5	R.NYYEAVAYTN[+1710.598]LSTFVNKIFVKPSSTGNEILDDENSIDSDIDGENNSR.R-NeuAc(1)Hex(5)HexNAc(3)	-6.33066	-6.39547	-5.63304	-5.30584	-0.660497	>tr|A0A4Z2CP65|A0A4Z2CP65_SCHJA Uncharacterized protein OS=Schistosoma japonicum OX=6182 GN=EWB00_008685 PE=4 SV=1
5	R.PAPEELTVVLGQSRHN[+3372.190]QSC[+57.021]EQC[+57.021]QTLAVR.S-NeuAc(3)Fuc(1)Hex(7)HexNAc(6)	-5.90615	-5.96299	-5.86224	-6.35846	-0.660497	>tr|A0A5F9DNQ4|A0A5F9DNQ4_RABIT Coagulation factor XII OS=Oryctolagus cuniculus OX=9986 GN=F12 PE=4 SV=1
5	R.PELTNLSLN[+1241.454]TSGTSFK.K-Fuc(1)Hex(3)HexNAc(3)	-5.9697	-6.17761	-6.12763	-5.9455	-0.758977	>tr|A0A5F9DND9|A0A5F9DND9_RABIT Coagulation factor V OS=Oryctolagus cuniculus OX=9986 GN=F5 PE=3 SV=1
5	R.PHTAVDSELPPN[+1768.640]VSVFIPPR.D-Fuc(1)Hex(5)HexNAc(4)	-5.33113	-5.88435	-5.54515	-5.66248	-0.660497	>tr|G1TK85|G1TK85_RABIT Immunoglobulin heavy constant mu OS=Oryctolagus cuniculus OX=9986 GN=IGHM PE=4 SV=2
5	R.PHTAVDSELPPN[+2060.755]VSVFIPPR.D-Fuc(3)Hex(5)HexNAc(4)	-5.98096	-6.58866	-6.46829	-5.41197	-0.660497	>tr|G1TK85|G1TK85_RABIT Immunoglobulin heavy constant mu OS=Oryctolagus cuniculus OX=9986 GN=IGHM PE=4 SV=2
5	R.PHTAVDSELPPN[+2278.809]VSVFIPPR.D-NeuAc(1)Hex(6)HexNAc(5)	-6.24377	-6.31983	-5.25429	-5.95022	-0.721466	>tr|G1TK85|G1TK85_RABIT Immunoglobulin heavy constant mu OS=Oryctolagus cuniculus OX=9986 GN=IGHM PE=4 SV=2
5	R.PIKN[+1024.359]K.S-Pent(1)Hex(3)HexNAc(2)	-5.82933	-6.1466	-5.4824	-5.6766	-0.660497	>tr|A0A5F9D3S6|A0A5F9D3S6_RABIT Uncharacterized protein OS=Oryctolagus cuniculus OX=9986 PE=4 SV=1
5	R.PIKN[+2424.867]K.S-NeuAc(1)Fuc(1)Hex(6)HexNAc(5)	-5.89987	-6.24118	-5.88187	-5.9466	0.283213876956592	>tr|A0A5F9D3S6|A0A5F9D3S6_RABIT Uncharacterized protein OS=Oryctolagus cuniculus OX=9986 PE=4 SV=1
5	R.PLFNLQN[+3007.058]K.T-NeuAc(3)Fuc(1)Hex(6)HexNAc(5)	-5.92249	-6.35501	-6.03998	-5.51265	-0.758977	>tr|A0A4Z2DWB7|A0A4Z2DWB7_SCHJA DNA ligase OS=Schistosoma japonicum OX=6182 GN=EWB00_003933 PE=3 SV=1
5	R.PLGVRAGPN[+2116.756]GTLFVADAYK.G-NeuAc(1)Hex(5)HexNAc(5)	-6.44183	-6.46712	-6.37273	-5.97824	-0.660497	>tr|A0A5F9CGZ9|A0A5F9CGZ9_RABIT Adipocyte plasma membrane-associated protein OS=Oryctolagus cuniculus OX=9986 GN=APMAP PE=3 SV=1
5	R.PSAISEGHGQYALN[+876.322]VTGPILNFFANHYNTPYPLEK.S-Fuc(1)Hex(2)HexNAc(2)	-5.76279	-5.72593	-5.94117	-5.37615	-0.660497	>tr|G1TE56|G1TE56_RABIT Aminopeptidase N OS=Oryctolagus cuniculus OX=9986 GN=ANPEP PE=3 SV=3
5	R.PSSRGASPN[+2457.877]R.S-Fuc(1)Hex(8)HexNAc(5)	-6.34373	-5.88072	-5.98641	-6.36576	-0.758977	>tr|G1T6S4|G1T6S4_RABIT Dystonin OS=Oryctolagus cuniculus OX=9986 GN=DST PE=3 SV=3
5	R.PTGEVYELEIDTLETTC[+57.021]HALDPTPLAN[+2407.852]C[+57.021]SVR.Q-NeuAc(2)Hex(5)HexNAc(5)	-5.64455	-5.71632	-6.12484	-6.08731	-0.684957	>tr|U3KMR2|U3KMR2_RABIT Alpha-2-HS-glycoprotein OS=Oryctolagus cuniculus OX=9986 GN=AHSG PE=4 SV=1
5	R.PTLLNDTGNYTC[+57.021]MLRN[+1095.397]TTYC[+57.021]SKVAFPLEVVQK.D-Hex(3)HexNAc(3)	-6.0246	-6.04056	-5.72198	-5.49931	-0.684957	>tr|A0A5F9DB30|A0A5F9DB30_RABIT Interleukin 1 receptor accessory protein OS=Oryctolagus cuniculus OX=9986 GN=IL1RAP PE=3 SV=1
5	R.PYLTEFIHN[+1872.651]TTVNYR.C-NeuAc(1)Hex(6)HexNAc(3)	-5.91232	-5.54107	-6.19675	-5.86215	-0.684957	>tr|G1SEL1|G1SEL1_RABIT Complement factor H related 5 OS=Oryctolagus cuniculus OX=9986 GN=CFHR5 PE=4 SV=2
5	R.PYLTEFIHN[+2861.000]TTVNYR.C-NeuAc(3)Hex(6)HexNAc(5)	-6.28751	-6.25946	-5.84295	-6.23921	-0.758977	>tr|G1SEL1|G1SEL1_RABIT Complement factor H related 5 OS=Oryctolagus cuniculus OX=9986 GN=CFHR5 PE=4 SV=2
5	R.QGASFLGILDIAGFEIFEVNSFEQLC[+57.021]IN[+1038.375]YTNEK.L-Fuc(1)Hex(3)HexNAc(2)	-6.09873	-5.59514	-6.31898	-5.99718	-0.758977	>sp|P35748|MYH11_RABIT Myosin-11 OS=Oryctolagus cuniculus OX=9986 GN=MYH11 PE=2 SV=2
5	R.QGC[+57.021]APGSQKN[+1216.423]SSLC[+57.021]ELC[+57.021]VGPSVC[+57.021]APNNR.E-Hex(5)HexNAc(2)	-6.69792	-5.70367	-5.76635	-5.91793	-0.758977	>sp|P19134|TRFE_RABIT Serotransferrin OS=Oryctolagus cuniculus OX=9986 GN=TF PE=1 SV=4
5	R.QGIPVFGQVC[+57.021]LEDGKGVPIPN[+2350.830]ETIFIQAYSANFFLK.A-NeuAc(2)Fuc(1)Hex(5)HexNAc(4)	-6.21253	-5.78485	-5.54683	-6.04393	-0.660497	>tr|A0A5F9DI97|A0A5F9DI97_RABIT Uncharacterized protein OS=Oryctolagus cuniculus OX=9986 PE=3 SV=1
5	R.QQTSN[+2861.000]DTVSPR.A-NeuAc(3)Hex(6)HexNAc(5)	-6.12015	-5.83464	-5.60207	-6.31435	-0.684957	>tr|G1TET0|G1TET0_RABIT Carboxypeptidase B2 OS=Oryctolagus cuniculus OX=9986 GN=CPB2 PE=3 SV=2
5	R.RILYSIAYN[+1063.407]C[+57.021]TLR.P-Fuc(2)Hex(1)HexNAc(3)	-5.6387	-5.74306	-5.93041	-5.76238	-0.660497	>tr|G1SEK8|G1SEK8_RABIT Fetuin B OS=Oryctolagus cuniculus OX=9986 GN=FETUB PE=4 SV=2
5	R.SAVSTSWLLPYNYTWSPKKVFVHTPTTN[+1063.407]YTLQDYR.R-Fuc(2)Hex(1)HexNAc(3)	-5.70725	-6.17025	-6.04428	-5.82443	-0.660497	>tr|G1SVB3|G1SVB3_RABIT Phospholipase A2 group XV OS=Oryctolagus cuniculus OX=9986 GN=PLA2G15 PE=3 SV=1
5	R.SDHVN[+1054.370]R.T-Hex(4)HexNAc(2)	-5.95549	-6.32633	-6.10546	-5.5064	-0.758977	>tr|G1SQ70|G1SQ70_RABIT Alpha-2-macroglobulin OS=Oryctolagus cuniculus OX=9986 GN=A2M PE=3 SV=3
5	R.SDHVNRTEVSTNHVLIYLDKVSN[+1216.423]QTLSLSFTVVQDIPVIDLKPAIVK.V-Hex(5)HexNAc(2)	-5.63513	-5.78415	-6.16183	-5.77814	-0.684957	>tr|G1SQ70|G1SQ70_RABIT Alpha-2-macroglobulin OS=Oryctolagus cuniculus OX=9986 GN=A2M PE=3 SV=3
5	R.SLHLDN[+2206.813]FSNQIGK.H-Fuc(4)Hex(5)HexNAc(4)	-6.19517	-6.47586	-5.71293	-5.91064	-0.684957	>tr|A0A5F9DND9|A0A5F9DND9_RABIT Coagulation factor V OS=Oryctolagus cuniculus OX=9986 GN=F5 PE=3 SV=1
5	R.SPLQQISTNSNNLVN[+4028.418]NSSC[+57.021]TYR.N-NeuAc(4)Fuc(1)Hex(8)HexNAc(7)	-5.76269	-5.77895	-5.97396	-5.6784	0.258695988087587	>tr|A0A4Z2D8T2|A0A4Z2D8T2_SCHJA Myosin IA heavy chain isoform 2 OS=Schistosoma japonicum OX=6182 GN=EWB00_003638 PE=3 SV=1
5	R.SQDIWTHSC[+57.021]PSSPGN[+2206.813]GTDTSH.--Fuc(4)Hex(5)HexNAc(4)	-6.16896	-6.17133	-5.91202	-6.0849	-0.758977	>sp|P15196|SHBG_RABIT Sex hormone-binding globulin OS=Oryctolagus cuniculus OX=9986 GN=SHBG PE=1 SV=2
5	R.SYFPETWIWELVVVN[+2278.809]SSGMAEVEATVPDTITEWK.A-NeuAc(1)Hex(6)HexNAc(5)	-6.00556	-6.0545	-6.07362	-6.087	-0.684957	>tr|G1TR31|G1TR31_RABIT Uncharacterized protein OS=Oryctolagus cuniculus OX=9986 PE=3 SV=3
5	R.TARPPLREQQFN[+1444.534]STIR.V-Fuc(1)Hex(3)HexNAc(4)	-5.85964	-5.8491	-6.72451	-5.70489	-0.660497	>tr|G1THZ6|G1THZ6_RABIT Immunoglobulin heavy constant mu OS=Oryctolagus cuniculus OX=9986 GN=IGHM PE=4 SV=3
5	R.TEVSTNHVLIYLDKVSN[+1850.693]QTLSLSFTVVQEIPVIDLK.P-Fuc(1)Hex(3)HexNAc(6)	-6.4793	-6.25447	-5.7115	-6.32894	-0.660497	>tr|A0A5F9CQC0|A0A5F9CQC0_RABIT Alpha-2-macroglobulin OS=Oryctolagus cuniculus OX=9986 GN=A2M PE=3 SV=1
5	R.TEVSTNHVLIYLDKVSN[+1897.682]QTLSLSFTVVQEIPVIDLKPAIVK.V-NeuAc(1)Fuc(1)Hex(4)HexNAc(4)	-6.7622	-5.9077	-5.87783	-5.93496	-0.684957	>tr|A0A5F9CQC0|A0A5F9CQC0_RABIT Alpha-2-macroglobulin OS=Oryctolagus cuniculus OX=9986 GN=A2M PE=3 SV=1
5	R.TFQIHVN[+1063.407]ISYTGK.R-Fuc(2)Hex(1)HexNAc(3)	-0.778432	-5.78924	-5.72184	-5.62474	-0.758977	>tr|A0A5F9C1C5|A0A5F9C1C5_RABIT Uncharacterized protein OS=Oryctolagus cuniculus OX=9986 PE=3 SV=1
5	R.TFQIHVN[+2076.750]ISYTGKR.P-Fuc(2)Hex(6)HexNAc(4)	-6.04402	-6.25789	-6.22349	-6.11906	-0.684957	>tr|A0A5F9C1C5|A0A5F9C1C5_RABIT Uncharacterized protein OS=Oryctolagus cuniculus OX=9986 PE=3 SV=1
5	R.TFQIHVN[+2206.813]ISYTGK.R-Fuc(4)Hex(5)HexNAc(4)	-0.778432	-0.745832	-0.837983	-0.755305	0.222099062710251	>tr|A0A5F9C1C5|A0A5F9C1C5_RABIT Uncharacterized protein OS=Oryctolagus cuniculus OX=9986 PE=3 SV=1
5	R.VDN[+2116.756]R.S-NeuAc(1)Hex(5)HexNAc(5)	-5.7012	-5.72062	-5.65739	-5.88079	-0.660497	>tr|G1SD43|G1SD43_RABIT Glycosyl-phosphatidylinositol-specific phospholipase D OS=Oryctolagus cuniculus OX=9986 GN=GPLD1 PE=3 SV=3
5	R.VELVN[+2350.830]ATC[+57.021]QDGYHLAEYAYHK.C-NeuAc(2)Fuc(1)Hex(5)HexNAc(4)	-6.43013	-6.17714	-5.75809	-6.52117	-0.721466	>tr|A0A5F9C497|A0A5F9C497_RABIT Complement C3d receptor 2 OS=Oryctolagus cuniculus OX=9986 GN=CR2 PE=4 SV=1
5	R.VLGQVNKYVEHNQNLIC[+57.021]NSLLWLVENC[+57.021]QLEN[+1316.475]GSFK.D-Fuc(2)Pent(1)Hex(3)HexNAc(2)	-5.12423	-5.70208	-6.44387	-6.52696	-0.684957	>tr|A0A5F9CD07|A0A5F9CD07_RABIT Complement C5 OS=Oryctolagus cuniculus OX=9986 GN=C5 PE=4 SV=1
5	R.VN[+1024.359]K.T-Pent(1)Hex(3)HexNAc(2)	-6.32367	-5.6459	-6.30743	-6.10513	-0.684957	>tr|A0A4Z2CPI5|A0A4Z2CPI5_SCHJA Myosin heavy chain, striated muscle OS=Schistosoma japonicum OX=6182 GN=EWB00_008791 PE=3 SV=1
5	R.VPMMNREDQYLYFLDRN[+1897.682]LSC[+57.021]VVLR.L-NeuAc(1)Fuc(1)Hex(4)HexNAc(4)	-6.26787	-6.25	-6.15376	-6.13672	-0.660497	>tr|G1SQG6|G1SQG6_RABIT SERPIN domain-containing protein OS=Oryctolagus cuniculus OX=9986 PE=3 SV=3
5	R.VSFPVDSELPPN[+1565.560]VSVFIPPR.D-Fuc(1)Hex(5)HexNAc(3)	-6.39824	-5.78844	-5.67544	-6.38096	-0.660497	>sp|P03988|IGHM_RABIT Ig mu chain C region secreted form OS=Oryctolagus cuniculus OX=9986 PE=2 SV=1
5	R.VSFPVDSELPPN[+2133.772]VSVFIPPR.D-Fuc(1)Hex(6)HexNAc(5)	-5.64313	-6.20292	-5.95875	-6.40652	-0.116839	>sp|P03988|IGHM_RABIT Ig mu chain C region secreted form OS=Oryctolagus cuniculus OX=9986 PE=2 SV=1
5	R.VSFPVDSELPPN[+2245.799]VSVFIPPR.D-NeuAc(2)Hex(4)HexNAc(5)	-6.02198	-6.17606	-6.20214	-5.82736	0.184494671254987	>sp|P03988|IGHM_RABIT Ig mu chain C region secreted form OS=Oryctolagus cuniculus OX=9986 PE=2 SV=1
5	R.VSFPVDSELPPN[+2262.814]VSVFIPPR.D-NeuAc(1)Fuc(1)Hex(5)HexNAc(5)	-5.74098	-6.38231	-6.34269	-5.6764	0.26486683679645	>sp|P03988|IGHM_RABIT Ig mu chain C region secreted form OS=Oryctolagus cuniculus OX=9986 PE=2 SV=1
5	R.VSFPVDSELPPN[+2279.830]VSVFIPPR.D-Fuc(2)Hex(6)HexNAc(5)	-5.67759	-6.26907	-6.14224	-5.94003	-0.660497	>sp|P03988|IGHM_RABIT Ig mu chain C region secreted form OS=Oryctolagus cuniculus OX=9986 PE=2 SV=1
5	R.VTGAPLVLQVGQLQLSHN[+1622.582]LSFVILMPQSLK.H-Hex(5)HexNAc(4)	-6.12932	-5.94684	-5.95412	-6.08158	-0.684957	>tr|G1SCJ8|G1SCJ8_RABIT Plasma protease C1 inhibitor OS=Oryctolagus cuniculus OX=9986 GN=SERPING1 PE=3 SV=3
5	R.VVYN[+1548.545]R.S-NeuAc(1)Hex(4)HexNAc(3)	-5.92977	-5.71506	-5.72122	-5.97142	0.283213876956592	>sp|P53761|LCAT_RABIT Phosphatidylcholine-sterol acyltransferase OS=Oryctolagus cuniculus OX=9986 GN=LCAT PE=1 SV=1
5	R.WVLTAAHC[+57.021]LLYPPWDKN[+1996.750]FTVNDILVR.I-Fuc(2)Hex(3)HexNAc(6)	-5.48321	-6.34227	-6.0979	-6.38441	-0.758977	>tr|Q28731|Q28731_RABIT Thrombin (Fragment) OS=Oryctolagus cuniculus OX=9986 GN=thrombin PE=2 SV=1
5	R.YAMFGN[+1751.624]DTISC[+57.021]TTHGNWTELPK.C-NeuAc(1)Hex(4)HexNAc(4)	-6.16755	-5.90323	-6.03025	-6.19439	-0.660497	>tr|G1SJM1|G1SJM1_RABIT Apolipoprotein H OS=Oryctolagus cuniculus OX=9986 GN=CEP112 PE=4 SV=2
5	R.YAMFGNDTISC[+57.021]TTHGN[+1913.677]WTELPK.C-NeuAc(1)Hex(5)HexNAc(4)	-6.191	-6.03225	-6.17874	-5.80848	-0.660497	>tr|G1SJM1|G1SJM1_RABIT Apolipoprotein H OS=Oryctolagus cuniculus OX=9986 GN=CEP112 PE=4 SV=2
5	R.YDLFHC[+57.021]STLASTVLRMDYKGN[+2861.000]ATALFLLPDEGK.L-NeuAc(3)Hex(6)HexNAc(5)	-6.58718	-6.01546	-5.65756	-6.67143	-0.684957	>tr|A0A5F9DT67|A0A5F9DT67_RABIT SERPIN domain-containing protein OS=Oryctolagus cuniculus OX=9986 GN=SERPINA1 PE=3 SV=1
5	R.YLN[+1914.697]YSR.T-Fuc(2)Hex(5)HexNAc(4)	-5.74537	-5.41557	-5.74091	-5.74723	-0.758977	>tr|G1TN25|G1TN25_RABIT Alpha-2-glycoprotein 1, zinc-binding OS=Oryctolagus cuniculus OX=9986 GN=AZGP1 PE=3 SV=3
5	R.YLYLASN[+2350.830]QSNK.W-NeuAc(2)Fuc(1)Hex(5)HexNAc(4)	0.0658875159211091	-0.646255	-0.361877	-0.79502	0.271009936095704	>tr|A0A5F9DJG6|A0A5F9DJG6_RABIT Amine oxidase OS=Oryctolagus cuniculus OX=9986 GN=AOC3 PE=3 SV=1
5	R.YNELLQSYQWKMLN[+2457.877]TSSLLDQPNEQFNWVSQLANLTQGPDQYYLR.V-Fuc(1)Hex(8)HexNAc(5)	-5.95813	-6.33598	-6.04466	-6.6853	-0.660497	>sp|Q9XSC5|CLUS_RABIT Clusterin OS=Oryctolagus cuniculus OX=9986 GN=CLU PE=2 SV=1
5	R.YQGN[+1548.545]ATALFILPEEGK.M-NeuAc(1)Hex(4)HexNAc(3)	-5.97332	-5.82997	-6.1193	-5.59925	-0.684957	>tr|G1SQG6|G1SQG6_RABIT SERPIN domain-containing protein OS=Oryctolagus cuniculus OX=9986 PE=3 SV=3
5	R.YQGN[+2204.772]ATALFILPEEGK.M-NeuAc(2)Hex(5)HexNAc(4)	1.24172866941573	1.07992525914939	1.08993980887759	0.850511271251207	1.4893250398731	>tr|G1SQG6|G1SQG6_RABIT SERPIN domain-containing protein OS=Oryctolagus cuniculus OX=9986 PE=3 SV=3
6	K.AFPEVC[+57.021]N[+2279.830]ETMMALWEEC[+57.021]K.P-Fuc(2)Hex(6)HexNAc(5)	-6.04674	-6.18472	-5.90334	-0.835796	-5.91059	>sp|Q9XSC5|CLUS_RABIT Clusterin OS=Oryctolagus cuniculus OX=9986 GN=CLU PE=2 SV=1
6	K.AHLN[+2569.905]MSR.V-NeuAc(2)Hex(6)HexNAc(5)	-6.03084	-6.11512	-6.33264	-0.416012	-0.660497	>tr|G1TET0|G1TET0_RABIT Carboxypeptidase B2 OS=Oryctolagus cuniculus OX=9986 GN=CPB2 PE=3 SV=2
6	K.AHSTFQISMN[+2204.772]LSYTGSRPISNMVIADVKMVSGFIALKPTVK.M-NeuAc(2)Hex(5)HexNAc(4)	0.441882944985142	0.634707972695204	0.0706913138275425	0.671945545750063	0.283213876956592	>tr|G1SQ70|G1SQ70_RABIT Alpha-2-macroglobulin OS=Oryctolagus cuniculus OX=9986 GN=A2M PE=3 SV=3
6	K.AHSTFQISMN[+2206.813]LSYTGSRPISNMVIADVKMVSGFIALKPTVK.M-Fuc(4)Hex(5)HexNAc(4)	-6.20663	-6.19161	-5.86621	-0.755305	-6.77213	>tr|G1SQ70|G1SQ70_RABIT Alpha-2-macroglobulin OS=Oryctolagus cuniculus OX=9986 GN=A2M PE=3 SV=3
6	K.AKELYDPVWQN[+917.349]FTDPELR.R-Fuc(1)Hex(1)HexNAc(3)	-6.33881	-6.00464	-6.08239	-0.416012	-6.25802	>sp|P12822|ACE_RABIT Angiotensin-converting enzyme OS=Oryctolagus cuniculus OX=9986 GN=ACE PE=1 SV=3
6	K.ALN[+1054.370]R.S-Hex(4)HexNAc(2)	-6.31324	-5.47469	-5.75	-0.416012	-6.08945	>sp|P15196|SHBG_RABIT Sex hormone-binding globulin OS=Oryctolagus cuniculus OX=9986 GN=SHBG PE=1 SV=2
6	K.ALN[+1872.651]R.S-NeuAc(1)Hex(6)HexNAc(3)	-6.04052	-5.78874	-6.61635	-0.416012	-5.9435	>sp|P15196|SHBG_RABIT Sex hormone-binding globulin OS=Oryctolagus cuniculus OX=9986 GN=SHBG PE=1 SV=2
6	K.ALN[+1955.724]R.S-Fuc(2)Hex(4)HexNAc(5)	-5.27951	-5.55569	-6.20527	-0.576258	-6.24693	>sp|P15196|SHBG_RABIT Sex hormone-binding globulin OS=Oryctolagus cuniculus OX=9986 GN=SHBG PE=1 SV=2
6	K.ALN[+2100.761]R.S-NeuAc(1)Fuc(1)Hex(4)HexNAc(5)	-6.01177	-5.59413	-6.37897	-0.755305	-0.758977	>sp|P15196|SHBG_RABIT Sex hormone-binding globulin OS=Oryctolagus cuniculus OX=9986 GN=SHBG PE=1 SV=2
6	K.AN[+1389.492]R.S-Pent(1)Hex(4)HexNAc(3)	-5.56033	-6.56135	-5.84874	-0.416012	-6.33555	>tr|A0A5F9D6F5|A0A5F9D6F5_RABIT Pericentriolar material 1 OS=Oryctolagus cuniculus OX=9986 GN=PCM1 PE=4 SV=1
6	K.AN[+2498.904]R.S-Fuc(1)Hex(7)HexNAc(6)	-5.99967	-6.0058	-6.22462	-0.416012	-6.11345	>tr|A0A5F9D6F5|A0A5F9D6F5_RABIT Pericentriolar material 1 OS=Oryctolagus cuniculus OX=9986 GN=PCM1 PE=4 SV=1
6	K.ANDRLDSFAN[+1606.587]YSHC[+57.021]GDC[+57.021]GEGAADK.T-Fuc(1)Hex(4)HexNAc(4)	-6.1706	-6.01747	-6.21371	-0.416012	-6.51347	>tr|G1SYK4|G1SYK4_RABIT Uncharacterized protein OS=Oryctolagus cuniculus OX=9986 PE=4 SV=2
6	K.ASALC[+57.021]LSN[+2116.756]DTGIGLSPIASLQAFQPFFVELTMPYSVIR.G-NeuAc(1)Hex(5)HexNAc(5)	-6.16276	-5.83225	-5.94829	-0.416012	-6.06059	>tr|G1SQ70|G1SQ70_RABIT Alpha-2-macroglobulin OS=Oryctolagus cuniculus OX=9986 GN=A2M PE=3 SV=3
6	K.C[+57.021]N[+1054.370]K.S-Hex(4)HexNAc(2)	-6.09728	-6.31747	-5.9949	0.64175371789712	-5.98098	>tr|G1TA60|G1TA60_RABIT Kinetochore scaffold 1 OS=Oryctolagus cuniculus OX=9986 GN=KNL1 PE=4 SV=2
6	K.C[+57.021]N[+1907.714]K.S-Hex(3)HexNAc(7)	-5.98195	-5.87483	-5.95495	-0.416012	-5.79646	>tr|G1TA60|G1TA60_RABIT Kinetochore scaffold 1 OS=Oryctolagus cuniculus OX=9986 GN=KNL1 PE=4 SV=2
6	K.DIHVVHFHGQTLLEN[+1694.603]GTQQHQLGVWPLLPGYWEPR.L-NeuAc(1)Fuc(1)Hex(4)HexNAc(3)	-6.09029	-6.18753	-6.03252	-0.755305	-6.09017	>tr|A0A5F9DLB4|A0A5F9DLB4_RABIT Coagulation factor V OS=Oryctolagus cuniculus OX=9986 GN=F5 PE=3 SV=1
6	K.DLLFSDDTEC[+57.021]LANLQN[+1914.697]K.T-Fuc(2)Hex(5)HexNAc(4)	-6.38589	-6.52042	-5.95241	-0.835796	-6.33186	>tr|G1TKE4|G1TKE4_RABIT Uncharacterized protein OS=Oryctolagus cuniculus OX=9986 PE=3 SV=1
6	K.EHEGAIYPDN[+1710.598]TTAFQKADDK.V-NeuAc(1)Hex(5)HexNAc(3)	-6.02315	-5.39742	-5.92442	-0.755305	-5.73737	>tr|G1SJX3|G1SJX3_RABIT Ceruloplasmin OS=Oryctolagus cuniculus OX=9986 GN=CP PE=3 SV=1
6	K.EHEGAIYPDN[+2059.735]TTAFQK.A-NeuAc(1)Fuc(1)Hex(5)HexNAc(4)	-5.69178	-6.13881	-6.06507	-0.755305	-5.92696	>tr|G1SJX3|G1SJX3_RABIT Ceruloplasmin OS=Oryctolagus cuniculus OX=9986 GN=CP PE=3 SV=1
6	K.ELHHLQEQN[+2350.830]VSNPFLDKEEFYIGSK.Y-NeuAc(2)Fuc(1)Hex(5)HexNAc(4)	0.407809343314832	0.556946564632651	0.285488893648089	0.759314487720558	0.469100170444643	>tr|G1SJX3|G1SJX3_RABIT Ceruloplasmin OS=Oryctolagus cuniculus OX=9986 GN=CP PE=3 SV=1
6	K.ELHHLQEQN[+3517.228]VSNPFLDKEEFYIGSK.Y-NeuAc(4)Hex(7)HexNAc(6)	-0.167891	0.0313484800569794	-0.102576	0.221622246184235	-0.140816	>tr|G1SJX3|G1SJX3_RABIT Ceruloplasmin OS=Oryctolagus cuniculus OX=9986 GN=CP PE=3 SV=1
6	K.EN[+2204.772]LTVR.C-NeuAc(2)Hex(5)HexNAc(4)	1.2410106062342	0.914730744193207	1.15268096545229	1.70058891661152	1.06557533703002	>tr|A0A5F9CJA1|A0A5F9CJA1_RABIT Uncharacterized protein OS=Oryctolagus cuniculus OX=9986 PE=4 SV=1
6	K.EN[+2756.989]DTK.I-NeuAc(2)Fuc(1)Hex(5)HexNAc(6)	-6.68557	-6.07694	-6.10143	-0.835796	-6.03021	>tr|G1U4L4|G1U4L4_RABIT Uncharacterized protein OS=Oryctolagus cuniculus OX=9986 PE=4 SV=2
6	K.FHDVSESTHWTPFLN[+1914.697]ASIHYIHENYPFPWEK.D-Fuc(2)Hex(5)HexNAc(4)	-5.92105	-6.05331	-6.23057	-0.755305	-5.73796	>tr|G1SD43|G1SD43_RABIT Glycosyl-phosphatidylinositol-specific phospholipase D OS=Oryctolagus cuniculus OX=9986 GN=GPLD1 PE=3 SV=3
6	K.FHIYN[+2457.877]GTR.P-Fuc(1)Hex(8)HexNAc(5)	-6.19214	-5.62562	-6.46212	-0.835796	-5.92171	>tr|A0A5F9CFU6|A0A5F9CFU6_RABIT Ubiquitin specific peptidase 9 X-linked OS=Oryctolagus cuniculus OX=9986 GN=USP9X PE=4 SV=1
6	K.FN[+1914.697]LTETAEAQIHDGFR.H-Fuc(2)Hex(5)HexNAc(4)	0.294250018604829	0.0884737366968349	0.371025325615321	0.720905141952565	0.213946091921996	>tr|G1TGM8|G1TGM8_RABIT SERPIN domain-containing protein OS=Oryctolagus cuniculus OX=9986 GN=SERPINA1 PE=3 SV=1
6	K.FN[+2204.772]VSLK.Y-NeuAc(2)Hex(5)HexNAc(4)	1.48083961139798	1.77159332930915	1.37670701183037	1.87334740706388	1.58162110718628	>tr|A0A5F9CAP0|A0A5F9CAP0_RABIT Uncharacterized protein OS=Oryctolagus cuniculus OX=9986 PE=4 SV=1
6	K.GDIYNFRLWN[+1063.407]FTMGSKILSNLSC[+57.021]NVK.G-Fuc(2)Hex(1)HexNAc(3)	-6.12666	-6.19644	-6.32267	-0.416012	-6.14886	>tr|A0A5F9DVW3|A0A5F9DVW3_RABIT Adhesion G protein-coupled receptor G6 OS=Oryctolagus cuniculus OX=9986 GN=ADGRG6 PE=3 SV=1
6	K.GDTHTQVLEGLKFN[+2060.755]LTETAEAQIHDGFR.H-Fuc(3)Hex(5)HexNAc(4)	-6.09931	-6.29514	-6.02094	-0.835796	-5.90436	>tr|G1TGM8|G1TGM8_RABIT SERPIN domain-containing protein OS=Oryctolagus cuniculus OX=9986 GN=SERPINA1 PE=3 SV=1
6	K.GHDLNEDGLVSWEEYKN[+1647.613]ATYGYVLDDPDPDDGFNYK.Q-Fuc(1)Hex(3)HexNAc(5)	-5.9532	-6.08551	-6.17627	-0.835796	-5.84009	>sp|Q6XLQ7|CALU_RABIT Calumenin OS=Oryctolagus cuniculus OX=9986 GN=CALU PE=1 SV=2
6	K.GIPMPN[+1971.719]K.T-Fuc(1)Hex(5)HexNAc(5)	-6.17418	-5.99064	-6.35618	-0.755305	-5.65157	>tr|G1SQ70|G1SQ70_RABIT Alpha-2-macroglobulin OS=Oryctolagus cuniculus OX=9986 GN=A2M PE=3 SV=3
6	K.GIPMPN[+2204.772]K.T-NeuAc(2)Hex(5)HexNAc(4)	2.83238403796782	2.91795646295549	3.0882443247528	3.15940807806037	2.44205083935712	>tr|G1SQ70|G1SQ70_RABIT Alpha-2-macroglobulin OS=Oryctolagus cuniculus OX=9986 GN=A2M PE=3 SV=3
6	K.GIPMPN[+2247.840]K.T-Fuc(4)Hex(4)HexNAc(5)	-5.86989	-5.3436	-5.8667	-0.576258	-6.11791	>tr|G1SQ70|G1SQ70_RABIT Alpha-2-macroglobulin OS=Oryctolagus cuniculus OX=9986 GN=A2M PE=3 SV=3
6	K.GIPMPN[+2861.000]K.T-NeuAc(3)Hex(6)HexNAc(5)	1.73516982329189	1.58963217609591	1.57436988014135	2.14289184831457	0.795580608877871	>tr|G1SQ70|G1SQ70_RABIT Alpha-2-macroglobulin OS=Oryctolagus cuniculus OX=9986 GN=A2M PE=3 SV=3
6	K.GKVEAHFSLIHYAGVVDYN[+2424.867]ITGWLEK.N-NeuAc(1)Fuc(1)Hex(6)HexNAc(5)	-5.46647	-6.26743	-0.866483	-0.835796	-5.69477	>tr|G1SJQ4|G1SJQ4_RABIT Uncharacterized protein OS=Oryctolagus cuniculus OX=9986 PE=3 SV=2
6	K.GN[+1095.397]R.T-Hex(3)HexNAc(3)	-0.563901	-6.08146	-6.24808	0.221622246184235	-6.33156	>sp|P13806|CA2D1_RABIT Voltage-dependent calcium channel subunit alpha-2/delta-1 OS=Oryctolagus cuniculus OX=9986 GN=CACNA2D1 PE=1 SV=1
6	K.GN[+2247.840]R.T-Fuc(4)Hex(4)HexNAc(5)	-5.97028	-6.90669	-5.70051	-0.835796	-6.02807	>sp|P13806|CA2D1_RABIT Voltage-dependent calcium channel subunit alpha-2/delta-1 OS=Oryctolagus cuniculus OX=9986 GN=CACNA2D1 PE=1 SV=1
6	K.GN[+2553.910]R.T-NeuAc(2)Fuc(1)Hex(5)HexNAc(5)	-6.01078	-6.26073	-6.49653	-0.835796	-6.18862	>sp|P13806|CA2D1_RABIT Voltage-dependent calcium channel subunit alpha-2/delta-1 OS=Oryctolagus cuniculus OX=9986 GN=CACNA2D1 PE=1 SV=1
6	K.GN[+714.269]K.S-Fuc(1)Hex(1)HexNAc(2)	-6.38824	-0.745832	-6.07907	-0.755305	-5.90362	>tr|A0A5F9CIL5|A0A5F9CIL5_RABIT Complement C3d receptor 2 OS=Oryctolagus cuniculus OX=9986 GN=CR2 PE=4 SV=1
6	K.GN[+730.264]K.S-Hex(2)HexNAc(2)	-5.85171	-6.08606	-6.07285	-0.835796	-5.9314	>tr|A0A5F9CIL5|A0A5F9CIL5_RABIT Complement C3d receptor 2 OS=Oryctolagus cuniculus OX=9986 GN=CR2 PE=4 SV=1
6	K.GVGIISEGN[+1225.460]ETVEDIAAR.L-Fuc(2)Hex(2)HexNAc(3)	-6.56094	-5.91653	-6.22331	-0.835796	-5.6612	>sp|Q9N0Z6|AT1A1_RABIT Sodium/potassium-transporting ATPase subunit alpha-1 OS=Oryctolagus cuniculus OX=9986 GN=ATP1A1 PE=1 SV=2
6	K.GVPIPN[+2204.772]ETIFIQAYSANFFLK.A-NeuAc(2)Hex(5)HexNAc(4)	-5.79623	-5.84336	-6.28881	-0.416012	-6.00748	>tr|A0A5F9DI97|A0A5F9DI97_RABIT Uncharacterized protein OS=Oryctolagus cuniculus OX=9986 PE=3 SV=1
6	K.GVPIPN[+568.212]ETIFIQAHSANFFLK.A-Hex(1)HexNAc(2)	-6.11024	-6.03232	-6.0742	-0.835796	-5.82957	>tr|G1TR31|G1TR31_RABIT Uncharacterized protein OS=Oryctolagus cuniculus OX=9986 PE=3 SV=3
6	K.HAN[+1419.502]WTLTPLK.S-Hex(5)HexNAc(3)	-5.78017	0.362848905111935	-6.3995	0.64175371789712	-5.61289	>sp|P27170|PON1_RABIT Serum paraoxonase/arylesterase 1 OS=Oryctolagus cuniculus OX=9986 GN=PON1 PE=1 SV=2
6	K.HN[+4028.418]FSFK.Y-NeuAc(4)Fuc(1)Hex(8)HexNAc(7)	-5.72519	-6.41878	-6.28095	-0.416012	-6.14202	>tr|A0A5F9CD07|A0A5F9CD07_RABIT Complement C5 OS=Oryctolagus cuniculus OX=9986 GN=C5 PE=4 SV=1
6	K.HNN[+1216.423]DTQHIWESDSNEFSVIADPR.G-Hex(5)HexNAc(2)	-6.05738	-6.12731	-6.52957	-0.835796	-6.25019	>tr|G1TBC1|G1TBC1_RABIT Endoplasmin OS=Oryctolagus cuniculus OX=9986 GN=HSP90B1 PE=3 SV=2
6	K.HNN[+1378.476]DTQHIWESDSNEFSVIADPR.G-Hex(6)HexNAc(2)	-5.75902	-6.10947	-6.52779	0.840536405342241	-5.87768	>tr|G1TBC1|G1TBC1_RABIT Endoplasmin OS=Oryctolagus cuniculus OX=9986 GN=HSP90B1 PE=3 SV=2
6	K.HNN[+1702.581]DTQHIWESDSNEFSVIADPR.G-Hex(8)HexNAc(2)	-5.43376	-6.06542	-5.78326	0.221622246184235	-6.42035	>tr|G1TBC1|G1TBC1_RABIT Endoplasmin OS=Oryctolagus cuniculus OX=9986 GN=HSP90B1 PE=3 SV=2
6	K.HRERNYYTN[+1694.603]TSPK.G-NeuAc(1)Fuc(1)Hex(4)HexNAc(3)	-5.55784	-5.25019	-5.96823	-0.416012	-5.8639	>tr|A0A5F9CIL5|A0A5F9CIL5_RABIT Complement C3d receptor 2 OS=Oryctolagus cuniculus OX=9986 GN=CR2 PE=4 SV=1
6	K.IEC[+57.021]VDGN[+1914.697]WTTLPTC[+57.021]IEEESTC[+57.021]GDIPELEHGYVEPSAPPYHHGDSVAFSC[+57.021]R.E-Fuc(2)Hex(5)HexNAc(4)	-6.57567	-5.57719	-5.95728	-0.416012	-5.81296	>tr|A0A5F9CG95|A0A5F9CG95_RABIT Uncharacterized protein OS=Oryctolagus cuniculus OX=9986 PE=4 SV=1
6	K.ISEQNDADN[+2245.799]ASVISVSSNFEPFATDDLGNTVIHLDQALAR.M-NeuAc(2)Hex(4)HexNAc(5)	-5.66657	-6.12873	-5.21015	-0.416012	-6.02129	>tr|A0A5F9D6F5|A0A5F9D6F5_RABIT Pericentriolar material 1 OS=Oryctolagus cuniculus OX=9986 GN=PCM1 PE=4 SV=1
6	K.ISETGHDIALIQLQAPLN[+2206.813]DTDIQKPIC[+57.021]LPSK.D-Fuc(4)Hex(5)HexNAc(4)	-6.27696	-0.581775	-5.97514	0.64175371789712	-6.26029	>tr|G1T127|G1T127_RABIT Kallikrein B1 OS=Oryctolagus cuniculus OX=9986 GN=KLKB1 PE=4 SV=2
6	K.ISN[+2424.867]FSTDIK.L-NeuAc(1)Fuc(1)Hex(6)HexNAc(5)	-6.01696	-6.23318	-5.98502	-0.416012	-6.02341	>tr|G1TET2|G1TET2_RABIT Lymphocyte cytosolic protein 1 OS=Oryctolagus cuniculus OX=9986 GN=LCP1 PE=4 SV=2
6	K.KGFN[+2204.772]ASYIR.V-NeuAc(2)Hex(5)HexNAc(4)	-6.12487	-6.19255	-5.38168	-0.416012	-6.41904	>tr|A0A5F9DVW3|A0A5F9DVW3_RABIT Adhesion G protein-coupled receptor G6 OS=Oryctolagus cuniculus OX=9986 GN=ADGRG6 PE=3 SV=1
6	K.KN[+1954.704]HTAVLEK.H-NeuAc(1)Hex(4)HexNAc(5)	-5.48726	-5.72492	-5.79218	-0.416012	-6.08701	>tr|G1TZA1|G1TZA1_RABIT C1q domain-containing protein OS=Oryctolagus cuniculus OX=9986 PE=4 SV=2
6	K.LC[+57.021]PDC[+57.021]PLLTPLN[+2245.799]DTR.V-NeuAc(2)Hex(4)HexNAc(5)	-0.557013	-0.581775	-0.591287	0.787817394454201	0.242775948696157	>tr|U3KMR2|U3KMR2_RABIT Alpha-2-HS-glycoprotein OS=Oryctolagus cuniculus OX=9986 GN=AHSG PE=4 SV=1
6	K.LC[+57.021]PDC[+57.021]PLLTPLN[+2350.830]DTR.V-NeuAc(2)Fuc(1)Hex(5)HexNAc(4)	-0.166109	-0.646255	-0.189594	0.337973124454817	0.010677473219746	>tr|U3KMR2|U3KMR2_RABIT Alpha-2-HS-glycoprotein OS=Oryctolagus cuniculus OX=9986 GN=AHSG PE=4 SV=1
6	K.LGAC[+57.021]N[+876.322]DTLK.Q-Fuc(1)Hex(2)HexNAc(2)	-6.12723	-6.46914	-6.96063	-0.835796	-5.77881	>tr|G1SIK0|G1SIK0_RABIT Antithrombin-III OS=Oryctolagus cuniculus OX=9986 GN=SERPINC1 PE=3 SV=1
6	K.LGN[+1751.624]WSAQPSC[+57.021]K.A-NeuAc(1)Hex(4)HexNAc(4)	-0.667458	-6.44804	-6.28617	-0.416012	-5.5689	>tr|G1SJM1|G1SJM1_RABIT Apolipoprotein H OS=Oryctolagus cuniculus OX=9986 GN=CEP112 PE=4 SV=2
6	K.LHINHNN[+1389.492]LTESVGPLPK.S-Pent(1)Hex(4)HexNAc(3)	-6.46668	-6.11351	-6.12027	-0.835796	-5.65811	>tr|G1SP97|G1SP97_RABIT Lumican OS=Oryctolagus cuniculus OX=9986 GN=LUM PE=3 SV=1
6	K.LHVLRC[+57.021]QGRN[+1647.613]YTLTGMDSC[+57.021]AVPAAVQK.A-Fuc(1)Hex(3)HexNAc(5)	-6.21177	-0.765241	-6.17484	1.36036613293671	-0.660497	>tr|A0A5F9DPA2|A0A5F9DPA2_RABIT Caspase recruitment domain family member 6 OS=Oryctolagus cuniculus OX=9986 GN=CARD6 PE=3 SV=1
6	K.LHVLRC[+57.021]QGRN[+1809.666]YTLTGMDSC[+57.021]AVPAAVQK.A-Fuc(1)Hex(4)HexNAc(5)	-5.55594	-5.64381	-6.06678	-0.755305	-5.94496	>tr|A0A5F9DPA2|A0A5F9DPA2_RABIT Caspase recruitment domain family member 6 OS=Oryctolagus cuniculus OX=9986 GN=CARD6 PE=3 SV=1
6	K.LHVLRC[+57.021]QGRN[+3517.228]YTLTGMDSC[+57.021]AVPAAVQK.A-NeuAc(4)Hex(7)HexNAc(6)	-6.0329	-5.76588	-6.22234	-0.835796	-5.82207	>tr|A0A5F9DPA2|A0A5F9DPA2_RABIT Caspase recruitment domain family member 6 OS=Oryctolagus cuniculus OX=9986 GN=CARD6 PE=3 SV=1
6	K.LN[+1914.697]GSFPGPLQPIVFQEALYNHR.G-Fuc(2)Hex(5)HexNAc(4)	-6.10719	-6.27523	-5.95736	-0.755305	-5.47041	>tr|G1U575|G1U575_RABIT C1q domain-containing protein OS=Oryctolagus cuniculus OX=9986 PE=4 SV=2
6	K.LQGPVAVYTWEGNQVN[+1897.682]ITC[+57.021]EVFAYPSATISWFR.D-NeuAc(1)Fuc(1)Hex(4)HexNAc(4)	-5.96667	-5.96976	-5.39199	-0.755305	-5.9694	>tr|G1SQI4|G1SQI4_RABIT Neural cell adhesion molecule 1 OS=Oryctolagus cuniculus OX=9986 GN=NCAM1 PE=4 SV=3
6	K.LQGPVAVYTWEGNQVN[+2262.814]ITC[+57.021]EVFAYPSATISWFR.D-NeuAc(1)Fuc(1)Hex(5)HexNAc(5)	-6.33267	-5.72377	-6.3054	-0.416012	-6.23934	>tr|G1SQI4|G1SQI4_RABIT Neural cell adhesion molecule 1 OS=Oryctolagus cuniculus OX=9986 GN=NCAM1 PE=4 SV=3
6	K.LSTSPFALN[+2756.989]LSILPNVK.F-NeuAc(2)Fuc(1)Hex(5)HexNAc(6)	-5.52181	-6.07627	-6.92137	-0.755305	-5.73603	>tr|G1U9R4|G1U9R4_RABIT Apolipoprotein B OS=Oryctolagus cuniculus OX=9986 GN=APOB PE=4 SV=2
6	K.LSYN[+2204.772]STK.K-NeuAc(2)Hex(5)HexNAc(4)	0.294250018604829	0.0884737366968349	0.101465570935514	0.481386009463258	0.000753419365710929	>tr|A0A5F9DR45|A0A5F9DR45_RABIT Complement component C6 OS=Oryctolagus cuniculus OX=9986 GN=C6 PE=3 SV=1
6	K.LVVHELLGN[+1694.603]WSYLLNC[+57.021]YDK.C-NeuAc(1)Fuc(1)Hex(4)HexNAc(3)	-5.98575	-5.52917	-5.52026	-0.416012	-5.82666	>tr|A0A4Z2DIF2|A0A4Z2DIF2_SCHJA Non-specific serine/threonine protein kinase (Fragment) OS=Schistosoma japonicum OX=6182 GN=EWB00_000694 PE=3 SV=1
[truncated: 942 more rows]

## Sheet: Table S3
Supplementary Table 3: The identified intact glycopeptides of A2M from the clinical serum samples using DDA analysis
[truncated: 55 more rows]

[truncated: 2 more sheets: Table S4, Table S5]
